# Supplementary material for: Systematic Analysis of the Aberrances and Functional Implications of UPR in Hepatocellular Carcinoma
Source: Research Square preprint supplement (doi:10.21203/rs.3.rs-2855755/v1), 2023-05-02
Supplement: Supplementary file 1 [file 6f703fdc7b33604cc00d1dd0.xlsx]

## Sheet: Table S1
Table S1. Unfolded protein response pathway relative genes from GSEA website
Symbol	Esembl_id
ALDH18A1	ENSG00000059573
ARFGAP1	ENSG00000101199
ASNS	ENSG00000070669
ATF3	ENSG00000162772
ATF4	ENSG00000128272
ATF6	ENSG00000118217
ATP6V0D1	ENSG00000159720
BAG3	ENSG00000151929
BANF1	ENSG00000175334
CALR	ENSG00000179218
CCL2	ENSG00000108691
CEBPB	ENSG00000172216
CEBPG	ENSG00000153879
CHAC1	ENSG00000128965
CKS1B	ENSG00000173207
CNOT2	ENSG00000111596
CNOT4	ENSG00000080802
CNOT6	ENSG00000113300
CXXC1	ENSG00000154832
DCP1A	ENSG00000272886
DCP2	ENSG00000172795
DCTN1	ENSG00000204843
DDIT4	ENSG00000168209
DDX10	ENSG00000178105
DKC1	ENSG00000130826
DNAJA4	ENSG00000140403
DNAJB9	ENSG00000128590
DNAJC3	ENSG00000102580
EDC4	ENSG00000038358
EDEM1	ENSG00000134109
EEF2	ENSG00000167658
EIF2AK3	ENSG00000172071
EIF2S1	ENSG00000134001
EIF4A1	ENSG00000161960
EIF4A2	ENSG00000156976
EIF4A3	ENSG00000141543
EIF4E	ENSG00000151247
EIF4EBP1	ENSG00000187840
EIF4G1	ENSG00000114867
ERN1	ENSG00000178607
ERO1L	ENSG00000197930
EXOC2	ENSG00000112685
EXOSC1	ENSG00000171311
EXOSC10	ENSG00000171824
EXOSC2	ENSG00000130713
EXOSC4	ENSG00000178896
EXOSC5	ENSG00000077348
EXOSC9	ENSG00000123737
FKBP14	ENSG00000106080
FUS	ENSG00000089280
GEMIN4	ENSG00000179409
GOSR2	ENSG00000108433
H2AFX	ENSG00000188486
HERPUD1	ENSG00000051108
HSP90B1	ENSG00000166598
HSPA5	ENSG00000044574
HSPA9	ENSG00000113013
HYOU1	ENSG00000149428
IARS	ENSG00000196305
IFIT1	ENSG00000185745
IGFBP1	ENSG00000146678
IMP3	ENSG00000136231
KDELR3	ENSG00000100196
KHSRP	ENSG00000088247
KIF5B	ENSG00000170759
LSM1	ENSG00000175324
LSM4	ENSG00000130520
MTHFD2	ENSG00000065911
SKIV2L2	ENSG00000039123
NABP1	ENSG00000173559
NFYA	ENSG00000001167
NFYB	ENSG00000120837
NHP2	ENSG00000145912
NOLC1	ENSG00000166197
NOP14	ENSG00000087269
NOP56	ENSG00000101361
NPM1	ENSG00000181163
PAIP1	ENSG00000172239
PARN	ENSG00000140694
PDIA5	ENSG00000065485
PDIA6	ENSG00000143870
POP4	ENSG00000105171
PREB	ENSG00000138073
PSAT1	ENSG00000135069
RPS14	ENSG00000164587
RRP9	ENSG00000114767
SDAD1	ENSG00000198301
SEC31A	ENSG00000138674
SERP1	ENSG00000120742
SHC1	ENSG00000160691
SLC1A4	ENSG00000115902
SLC30A5	ENSG00000145740
SLC7A5	ENSG00000103257
SPCS1	ENSG00000114902
SPCS3	ENSG00000129128
SRPR	ENSG00000182934
SRPRB	ENSG00000144867
SSR1	ENSG00000124783
STC2	ENSG00000113739
TARS	ENSG00000113407
TATDN2	ENSG00000157014
TSPYL2	ENSG00000184205
TTC37	ENSG00000198677
TUBB2A	ENSG00000137267
VEGFA	ENSG00000112715
WFS1	ENSG00000109501
WIPI1	ENSG00000070540
XBP1	ENSG00000100219
XPOT	ENSG00000184575
YIF1A	ENSG00000174851
YWHAZ	ENSG00000164924
ZBTB17	ENSG00000116809

## Sheet: Table S2
Table S2. Risky score across the 30 cancer types in TCGA pancancer project.
Tumor	Total risky score	Total risky score(absolute value)	The possible highest total risky score	Prop
LIHC	67	67	112	0.598214
ACC	66	66	112	0.589286
KICH	52	52	112	0.464286
LGG	45	45	112	0.401786
KIRP	38	38	112	0.339286
UVM	35	35	112	0.3125
BLCA	30	30	112	0.267857
KIRC	-27	27	112	0.241071
READ	-25	25	112	0.223214
LUAD	24	24	112	0.214286
BRCA	24	24	112	0.214286
MESO	24	24	112	0.214286
CESC	18	18	112	0.160714
HNSC	17	17	112	0.151786
SARC	16	16	112	0.142857
PAAD	14	14	112	0.125
PRAD	12	12	112	0.107143
GBM	11	11	112	0.0982143
LUSC	9	9	112	0.0803571
OV	-9	9	112	0.0803571
THCA	6	6	112	0.0535714
UCEC	-4	4	112	0.0357143
STAD	2	2	112	0.0178571
PCPG	2	2	112	0.0178571
COAD	1	1	112	0.00892857
ESCA	1	1	112	0.00892857
CHOL	1	1	112	0.00892857
TGCT	0	0	112	0
SKCM	0	0	112	0
UCS	0	0	112	0

## Sheet: Table S3
Table S3. The cox rank of each unfolded protein response relative genes
genes	Total risky score	Cox rank
SHC1	11	TOP
EIF4G1	10	TOP
FKBP14	10	TOP
HSP90B1	10	TOP
NOP56	10	TOP
PDIA6	10	TOP
SLC7A5	10	TOP
ASNS	9	High
EIF4EBP1	9	High
ERO1L	9	High
H2AFX	9	High
HSPA5	9	High
KDELR3	9	High
STC2	9	High
YWHAZ	9	High
CALR	8	Moderate
CEBPB	8	Moderate
CKS1B	8	Moderate
EIF4A1	8	Moderate
HYOU1	8	Moderate
MTHFD2	8	Moderate
TARS	8	Moderate
XPOT	8	Moderate
DDX10	7	Low
DKC1	7	Low
EIF4A3	7	Low
IGFBP1	7	Low
NPM1	7	Low
PREB	7	Low
DDIT4	6	Low
EIF2S1	6	Low
EXOSC1	6	Low
PSAT1	6	Low
SLC30A5	6	Low
SRPRB	6	Low
SSR1	6	Low
TUBB2A	6	Low
WIPI1	6	Low
ALDH18A1	5	Low
ARFGAP1	5	Low
BANF1	5	Low
CHAC1	5	Low
EXOSC10	5	Low
EXOSC9	5	Low
GOSR2	5	Low
RRP9	5	Low
SPCS3	5	Low
VEGFA	5	Low
YIF1A	5	Low
ZBTB17	5	Low
ATF3	4	Low
ATF4	4	Low
CEBPG	4	Low
CNOT2	4	Low
DCP2	4	Low
DCTN1	4	Low
EXOSC2	4	Low
EXOSC5	4	Low
HSPA9	4	Low
IARS	4	Low
LSM4	4	Low
NABP1	4	Low
NFYA	4	Low
NOLC1	4	Low
SRPR	4	Low
CNOT4	3	Low
EDEM1	3	Low
NOP14	3	Low
PARN	3	Low
SEC31A	3	Low
SLC1A4	3	Low
CNOT6	2	Low
DNAJC3	2	Low
EDC4	2	Low
ERN1	2	Low
EXOSC4	2	Low
KHSRP	2	Low
KIF5B	2	Low
LSM1	2	Low
NFYB	2	Low
PAIP1	2	Low
PDIA5	2	Low
POP4	2	Low
ATF6	1	Low
BAG3	1	Low
CCL2	1	Low
CXXC1	1	Low
DNAJA4	1	Low
EIF2AK3	1	Low
EIF4E	1	Low
FUS	1	Low
TTC37	1	Low
ATP6V0D1	0	Null
DCP1A	0	Null
EXOC2	0	Null
GEMIN4	0	Null
SKIV2L2	0	Null
NHP2	0	Null
RPS14	0	Null
SERP1	0	Null
TATDN2	0	Null
WFS1	0	Null
DNAJB9	-1	Protective
SDAD1	-1	Protective
SPCS1	-1	Protective
IMP3	-2	Protective
TSPYL2	-2	Protective
EEF2	-3	Protective
EIF4A2	-3	Protective
XBP1	-3	Protective
HERPUD1	-4	Protective
IFIT1	-4	Protective

## Sheet: Table S4
													Table S4. Wilcox test of the estimated AUC values among different drugs
													drug	high EPI group	low EPI group	pvalue
													PAZOPANIB	0.943626	0.720894	0.00329451
													ETOPOSIDE	0.839404	0.567854	0.0106033
													TASELISIB	0.876102	0.926942	0.0106033
													SABUTOCLAX, BI-97C1	0.706063	0.572387	0.0106033
													JQ12	0.863125	0.59139	0.0151936
													EMBELIN	0.839651	0.712062	0.0151936
													SB52334	0.96506	0.911069	0.0151936
													SB 505124	0.944694	0.841465	0.0151936
													PONATINIB	0.946825	0.834278	0.0214507
													SHIKONIN	0.623229	0.374515	0.0214507
													FH535	0.71953	0.501089	0.0214507
													OBATOCLAX	0.522523	0.175654	0.0214507
													BEXAROTENE	0.960726	0.882258	0.0214507
													KOBE2602	0.966676	0.917454	0.0214507
													AICAR, N1-(B-D-RIBOFURANOSYL)-5-AMINOIMIDAZOLE-4-CARBOXAMIDE	0.84739	0.930609	0.0214507
													TRAMETINIB	0.762905	0.468071	0.0214507
													KIN001-206	0.826002	0.560013	0.0298421
													TIPIFARNIB	0.771496	0.506978	0.0298421
													AMUVATINIB	0.918219	0.811152	0.0298421
													REFAMETINIB	0.855688	0.740331	0.0298421
													VINORELBINE	0.827901	0.638865	0.0409136
													AR-12	0.793149	0.673805	0.0409136
													GSK1059615	0.402839	0.167221	0.0409136
													DOXORUBICIN	0.769975	0.573731	0.055285
													QS11	0.916206	0.879891	0.055285
													GSK650394	0.913199	0.797342	0.055285
													RU-SKI-43	0.969483	0.926205	0.055285
													681640	0.95313	0.965474	0.055285
													RTRAIL	0.868389	0.930981	0.055285
													IPA-3	0.931553	0.867763	0.0736383
													THAPSIGARGIN	0.47992	0.187088	0.0736383
													BLEOMYCIN	0.680931	0.388676	0.0736383
													TAK-715	0.95578	0.904485	0.0736383
													SU-11274	0.937387	0.883055	0.0736383
													AST-1306	0.646591	0.51172	0.0736383
													IKK-2-INHIBITOR-V	0.569958	0.346356	0.0736383
													NILOTINIB	0.982014	0.972705	0.0736383
													DIHYDROROTENONE	0.896276	0.718268	0.0736383
													DMOG, DIMETHYLOXALYLGLCINE	0.523516	0.402314	0.0966976
													EPOTHILONE B, GNF-PF-193	0.700295	0.466344	0.0966976
													AR-42	0.656895	0.503693	0.0966976
													T0901317	0.974954	0.960202	0.0966976
													VOXTALISIB	0.931514	0.888642	0.0966976
													CPI-613	0.849214	0.778044	0.0966976
													VORINOSTAT	0.768237	0.696426	0.0966976
													AZD8055	0.778955	0.743361	0.0966976
													VE-822	0.906075	0.946107	0.0966976
													GEMCITABINE	0.69919	0.470526	0.125201
													MITOMYCIN-C	0.550249	0.458072	0.125201
													AZD6482	0.929819	0.859174	0.125201
													JQ1	0.794491	0.641037	0.125201
													AKT INHIBITOR VIII, KIN001-102	0.939192	0.884781	0.125201
													AS601245	0.877801	0.796088	0.125201
													ALECTINIB	0.983419	0.976528	0.125201
													WYE-125132	0.412522	0.238607	0.125201
													ETP-45835	0.969077	0.98426	0.125201
													AXITINIB	0.942256	0.90783	0.125201
													PD-0325901	0.878076	0.810961	0.125201
													ICL1100013	0.772911	0.629233	0.125201
													BMS-754807	0.81336	0.77918	0.159864
													AUY922	0.768936	0.61031	0.159864
													GSK1904529A	0.968382	0.950335	0.159864
													TL-1-85	0.905892	0.875465	0.159864
													KIN001-270	0.968412	0.942485	0.159864
													PILARALISIB, XL-147	0.829506	0.730733	0.159864
													C-75	0.973924	0.928119	0.159864
													CD532	0.692641	0.594606	0.159864
													PIPERLONGUMINE	0.77723	0.741354	0.159864
													TALAZOPARIB	0.853762	0.887899	0.159864
													UPROSERTIB	0.85935	0.903037	0.159864
													WZ4003	0.904941	0.925543	0.159864
													OTX015	0.855416	0.88704	0.159864
													GSK269962A	0.884116	0.831275	0.201336
													5-FLUOROURACIL	0.92075	0.862158	0.201336
													DACINOSTAT	0.583858	0.429616	0.201336
													TL-2-105	0.973539	0.958181	0.201336
													VX-11E	0.933952	0.875913	0.201336
													VNLG/124	0.979898	0.972917	0.201336
													CAY10603	0.635815	0.498262	0.201336
													MASITINIB	0.928894	0.885736	0.201336
													EX-527	0.980234	0.974815	0.201336
													TORIN-2	0.32047	0.167118	0.201336
													ALISERTIB	0.931072	0.885083	0.201336
													A-83-01	0.96108	0.943863	0.201336
													PD-173074	0.979342	0.890086	0.201336
													(5Z)-7-OXOZEAENOL	0.775538	0.660101	0.201336
													DABRAFENIB	0.960785	0.92084	0.201336
													EPZ-5676	0.976641	0.981413	0.201336
													ML323, GTPL7898, AOB2313,	0.935033	0.9009	0.201336
													CARMUSTINE	0.97606	0.961522	0.201336
													TENIPOSIDE	0.894251	0.827751	0.201336
													ELEPHANTIN	0.914501	0.875318	0.201336
													OF-1	0.941672	0.862408	0.201336
													CRIZOTINIB	0.981445	0.985613	0.250153
													JNK-9L, KIN001-204	0.694241	0.562022	0.250153
													PAC-1	0.951829	0.933693	0.250153
													ISPINESIB MESYLATE, SB-715992	0.916353	0.847537	0.250153
													GSK1070916	0.851845	0.82854	0.250153
													STF-62247	0.981517	0.974524	0.250153
													TUBASTATIN A	0.972958	0.944358	0.250153
													I-BET-762	0.921156	0.846688	0.250153
													XMD13-2	0.958295	0.937144	0.250153
													APITOLISIB, GDC0980	0.48261	0.394913	0.250153
													METAP2 INHIBITOR, A832234	0.948882	0.932213	0.250153
													BAM7	0.971778	0.925467	0.250153
													CISPLATIN	0.866385	0.913469	0.250153
													PFI-1	0.912614	0.877377	0.250153
													UNC1215	0.976539	0.982321	0.250153
													SGC0946	0.976905	0.982939	0.250153
													APR-246	0.917613	0.930458	0.250153
													ALPELISIB	0.946257	0.965893	0.250153
													LY2109761	0.968011	0.97435	0.250153
													BICALUTAMIDE	0.984719	0.983288	0.306685
													MIDOSTAURIN	0.877738	0.829978	0.306685
													CP-724714	0.968112	0.95458	0.306685
													JW-7-24-1	0.805577	0.747293	0.306685
													OSI-027	0.678343	0.518345	0.306685
													QL-XI-92	0.973866	0.950548	0.306685
													BRIVANIB	0.943962	0.91571	0.306685
													NINTEDANIB	0.82327	0.749848	0.306685
													SPHINGOSINE KINASE 1 INHIBITOR II, PF-543	0.976405	0.983944	0.306685
													ALVOCIDIB	0.656327	0.595806	0.306685
													NSC-319726	0.762214	0.654248	0.306685
													LGK-974	0.964151	0.949743	0.306685
													GEFITINIB	0.967095	0.948025	0.306685
													OLAPARIB	0.982271	0.973713	0.306685
													AFATINIB	0.968373	0.940551	0.306685
													SB-590885	0.98032	0.94133	0.306685
													TW-37	0.572217	0.498318	0.306685
													BX-912	0.848253	0.853493	0.371093
													ACY-1215	0.746308	0.668061	0.371093
													NVP-BHG712	0.927733	0.871132	0.371093
													TWS-119	0.769664	0.691325	0.371093
													CAP-232, TT-232, TLN-232	0.898315	0.921724	0.371093
													MIM1	0.884272	0.804944	0.371093
													TEMSIROLIMUS	0.774312	0.704056	0.371093
													YK-4-279	0.778192	0.733363	0.371093
													PRT062607	0.882867	0.9165	0.371093
													BMS-536924	0.919836	0.886086	0.443289
													NSC-87877	0.949727	0.97915	0.443289
													LINSITINIB	0.913645	0.884683	0.443289
													ZSTK-474	0.771502	0.677616	0.443289
													GENENTECH CPD 10	0.841045	0.770143	0.443289
													FMK, KIN001-242	0.978376	0.96772	0.443289
													NPK76-II-72-1	0.925439	0.88391	0.443289
													CUDC-101	0.62032	0.487883	0.443289
													BELINOSTAT	0.529781	0.363582	0.443289
													BIX02189	0.958736	0.957502	0.443289
													MPS-1-IN-1	0.937285	0.920539	0.443289
													TIVOZANIB	0.982248	0.979126	0.443289
													QL-X-138	0.808024	0.711484	0.443289
													DACOMITINIB	0.762235	0.688047	0.443289
													KB NB 142-70	0.818417	0.785333	0.443289
													EEF2K INHIBITOR, A-484954	0.983428	0.985676	0.443289
													LDN-193189	0.698184	0.661456	0.443289
													WNT-C59	0.957492	0.949403	0.443289
													VELIPARIB	0.984977	0.979397	0.443289
													LESTAURTINIB	0.73365	0.711074	0.443289
													CCT007093	0.980981	0.982739	0.443289
													MITOXANTRONE	0.847117	0.887285	0.443289
													MN-64	0.951319	0.958683	0.443289
													BAY-61-3606	0.881169	0.830137	0.522903
													UNC0638	0.856779	0.806863	0.522903
													QUIZARTINIB	0.983372	0.974465	0.522903
													PELITINIB	0.919997	0.879252	0.522903
													KIN001-236	0.97699	0.953102	0.522903
													TPCA-1	0.881591	0.83283	0.522903
													VENOTOCLAX, ABT-199, VENECLEXTA, GDC-0199	0.982993	0.983927	0.522903
													METHOTREXATE	0.961627	0.979142	0.522903
													TANESPIMYCIN	0.837717	0.886744	0.522903
													PEVONEDISTAT	0.868446	0.874064	0.522903
													SCH772984, CS-1421	0.912169	0.846335	0.522903
													ZOLEDRONATE, ZOLEDRONIC ACID, ZOMETA, RECLAST	0.9776	0.978673	0.522903
													ENTINOSTAT	0.873867	0.879675	0.60928
													BMS-345541	0.896777	0.856502	0.60928
													CABOZANTINIB	0.905156	0.925275	0.60928
													WZ3105	0.896012	0.903368	0.60928
													XMD14-99	0.979805	0.978258	0.60928
													LINIFANIB	0.978887	0.982583	0.60928
													WHI-P97, KIN001-055	0.966524	0.960197	0.60928
													OSI-930	0.971173	0.977963	0.60928
													THZ-2-49	0.821635	0.830495	0.60928
													CANERTINIB	0.737567	0.693136	0.60928
													LIMK1 INHIBITOR BMS4	0.955339	0.93842	0.60928
													CAY10566	0.980191	0.968078	0.60928
													PANOBINOSTAT	0.469445	0.487414	0.60928
													FTY-720, FINGOLIMOD HYDROCHLORIDE; GILENYA; TDI-132; IMUSERA; GILENIA	0.78985	0.778239	0.60928
													KU-55933	0.952664	0.937843	0.60928
													VISMODEGIB	0.975825	0.979096	0.60928
													NVP-BEZ235	0.728234	0.71465	0.60928
													IOX2	0.977868	0.981836	0.60928
													TEMOZOLOMIDE	0.980264	0.979913	0.60928
													IRINOTECAN	0.952899	0.940725	0.60928
													AZD8931	0.951891	0.957945	0.60928
													PHENFORMIN	0.908006	0.895844	0.701478
													BRYOSTATIN 1	0.9794	0.964985	0.701478
													RUXOLITINIB	0.979646	0.982658	0.701478
													AS605240, KIN001-173	0.862441	0.861567	0.701478
													FR-180204	0.97742	0.966604	0.701478
													NSC-207895, XI-006	0.873905	0.81801	0.701478
													GSK2126458	0.831057	0.779806	0.701478
													JNJ-38877605	0.938339	0.94471	0.701478
													CX-5461	0.944442	0.874005	0.701478
													PIK-93	0.821387	0.816989	0.701478
													AT7867	0.837404	0.767455	0.701478
													FILANESIB	0.726629	0.72585	0.701478
													AGI-6780	0.974456	0.976136	0.701478
													TRETINOIN	0.972336	0.973167	0.701478
													NAVITOCLAX	0.920079	0.883222	0.701478
													LENALIDOMIDE	0.984576	0.979134	0.701478
													GW 441756	0.941704	0.944266	0.701478
													PLX-4720	0.95958	0.964055	0.701478
													JNK INHIBITOR VIII	0.961644	0.967165	0.701478
													RO-3306	0.954061	0.948471	0.701478
													PF-4708671	0.958031	0.943574	0.701478
													SERDEMETAN	0.874478	0.878838	0.701478
													CCT018159	0.922719	0.929757	0.701478
													RUCAPARIB	0.974551	0.977154	0.701478
													TAMOXIFEN	0.974529	0.966751	0.701478
													BLEOMYCIN (50 UM)	0.652308	0.671377	0.701478
													AZ960	0.859813	0.856315	0.701478
													CZC24832	0.970675	0.968135	0.701478
													AZD5582	0.859464	0.880623	0.701478
													PCI-34051	0.945998	0.941879	0.701478
													DACTINOMYCIN	0.962826	0.962832	0.701478
													SINULARIN	0.958903	0.949233	0.701478
													CP466722	0.815533	0.796921	0.798298
													FTI-277	0.96159	0.93971	0.798298
													LFM-A13	0.960066	0.976119	0.798298
													NG-25	0.861326	0.871194	0.798298
													KIN001-244	0.855242	0.836658	0.798298
													KIN001-042	0.947975	0.935717	0.798298
													KIN001-260, BAYER IKKB INHIBITOR	0.942292	0.958977	0.798298
													PI-103	0.712828	0.682381	0.798298
													Y-39983	0.929519	0.91245	0.798298
													GSK690693	0.975528	0.952657	0.798298
													TENOVIN-6	0.760719	0.717569	0.798298
													THZ-2-102-1	0.655172	0.643044	0.798298
													ARA-G, 9-??-D-ARABINOFURANOSYL GUANINE	0.982666	0.978557	0.798298
													CYTARABINE	0.79471	0.763926	0.798298
													DOCETAXEL	0.77676	0.808804	0.798298
													BOSUTINIB	0.942764	0.939012	0.798298
													AZD7762	0.738856	0.774478	0.798298
													VX-702	0.980575	0.981118	0.798298
													KU-57788	0.950771	0.946407	0.798298
													MIRIN	0.832903	0.836244	0.798298
													ZM-447439	0.943654	0.942752	0.798298
													PALBOCICLIB	0.881639	0.907064	0.798298
													SELUMETINIB	0.944483	0.895179	0.798298
													SN-38	0.756967	0.771404	0.798298
													PFI-3	0.979059	0.978593	0.798298
													OXALIPLATIN	0.964926	0.96725	0.798298
													NIRAPARIB	0.951808	0.951922	0.798298
													FULVESTRANT	0.972878	0.978315	0.798298
													APABETALONE	0.96712	0.962468	0.798298
													GS-9973	0.892289	0.889557	0.798298
													FLUDARABINE	0.965237	0.910272	0.798298
													NELARABINE	0.977019	0.974277	0.798298
													KRAS (G12C) INHIBITOR-12, GTPL8020	0.920143	0.913826	0.798298
													ENZASTAURIN	0.85586	0.874835	0.898327
													IC-87114	0.97154	0.951666	0.898327
													IDELALISIB	0.959832	0.937383	0.898327
													YM-155	0.269101	0.357678	0.898327
													KIN001-266	0.887075	0.884152	0.898327
													PHA-793887	0.935562	0.898269	0.898327
													FORETINIB	0.657086	0.659794	0.898327
													YM-201636	0.90593	0.892944	0.898327
													SNX-2112	0.680982	0.651561	0.898327
													XMD15-27	0.980906	0.978265	0.898327
													PEMETREXED	0.957208	0.969782	0.898327
													ELESCLOMOL	0.572184	0.576273	0.898327
													NUTLIN-3A (-)	0.982737	0.975178	0.898327
													UNC0642	0.980242	0.980653	0.898327
													XAV-939	0.950116	0.944016	0.898327
													DINACICLIB	0.602191	0.6126	0.898327
													LEFLUNOMIDE	0.885957	0.878365	0.898327
													GSK2606414	0.91586	0.917045	0.898327
													ACETALAX, OXYPHENISATIN ACETATE	0.903874	0.894652	0.898327
													PODOPHYLLOTOXIN	0.836842	0.816136	0.898327
													GW-2580	0.972224	0.973892	0.949004
													CHIR-99021	0.967282	0.958444	1
													AVAGACESTAT	0.981032	0.977212	1
													AT-7519	0.763105	0.74141	1
													GSK429286A	0.975289	0.910736	1
													ZIBOTENTAN	0.983498	0.983842	1
													TG-101348	0.836709	0.861725	1
													TRICHOSTATIN-A	0.689434	0.696126	1
													LCL-161	0.98192	0.981066	1
													VINBLASTINE	0.680358	0.697281	1
													MOTESANIB	0.956515	0.957169	1
													BX-795	0.874497	0.871041	1
													MK-2206	0.827591	0.821135	1
													GDC-0941	0.810417	0.812382	1
													EHT 1864	0.933712	0.929571	1
													CAMPTOTHECIN	0.92357	0.91374	1
													EPZ004777	0.97682	0.975422	1
													IWP-2, WNT INHIBITOR IWP-2	0.970881	0.971372	1
													GSK343, GTPL8240, AOB3680, AK175558	0.976001	0.976303	1
													PICOLINICI-ACID, PICOLINATE	0.968094	0.968858	1
													IBRUTINIB	0.943905	0.939264	1
													TOPOTECAN	0.845307	0.832898	1
													VINCRISTINE	0.735214	0.685194	1
													GALLIBISCOQUINAZOLE	0.969694	0.969304	1

## Sheet: Table S5
Table S5. , Differences in pathway activities scored by GSVA between high and low EPI group from TCGA (n= 185 and 184 samples, respectively).
Pathway	logFC	AveExpr	t	P.Value	adj.P.Val	B
HALLMARK_UNFOLDED_PROTEIN_RESPONSE	0.26959	-0.0331853	9.46751	3.27762e-19	4.09702e-18	32.661
HALLMARK_MTORC1_SIGNALING	0.253026	-0.0396395	8.38346	1.05133e-15	8.76106e-15	24.6933
HALLMARK_MITOTIC_SPINDLE	0.252006	-0.0339598	7.85569	4.24106e-14	3.02933e-13	21.0527
HALLMARK_GLYCOLYSIS	0.15468	-0.0288779	7.42989	7.41879e-13	4.63674e-12	18.2398
HALLMARK_G2M_CHECKPOINT	0.294346	-0.0357271	7.31158	1.61044e-12	8.94687e-12	17.4788
HALLMARK_UV_RESPONSE_UP	0.156727	-0.0330429	7.21082	3.09444e-12	1.54722e-11	16.8379
HALLMARK_E2F_TARGETS	0.314095	-0.037338	7.00143	1.17734e-11	5.35154e-11	15.5276
HALLMARK_APOPTOSIS	0.173579	-0.0390836	6.8146	3.78498e-11	1.57707e-10	14.3837
HALLMARK_MYC_TARGETS_V2	0.267484	-0.03128	6.74029	5.98368e-11	2.30142e-10	13.9353
HALLMARK_MYC_TARGETS_V1	0.270257	-0.0272765	6.67451	8.94704e-11	2.98235e-10	13.5417
HALLMARK_APICAL_JUNCTION	0.142949	-0.0278648	6.57126	1.67239e-10	5.22623e-10	12.9299
HALLMARK_IL2_STAT5_SIGNALING	0.175327	-0.0401925	6.48584	2.79038e-10	8.20701e-10	12.4296
HALLMARK_P53_PATHWAY	0.134463	-0.0330743	6.33907	6.64547e-10	1.84596e-09	11.5821
HALLMARK_HYPOXIA	0.14637	-0.0271544	6.24248	1.16666e-09	2.97006e-09	11.0328
HALLMARK_NOTCH_SIGNALING	0.181483	-0.0454277	5.67569	2.76918e-08	6.59328e-08	7.95012
HALLMARK_HEDGEHOG_SIGNALING	0.191699	-0.0419335	5.64011	3.3517e-08	7.6175e-08	7.76478
HALLMARK_PROTEIN_SECRETION	0.198441	-0.0254781	5.62079	3.71635e-08	8.07902e-08	7.66454
HALLMARK_PI3K_AKT_MTOR_SIGNALING	0.151675	-0.025326	5.38862	1.25756e-07	2.61991e-07	6.48289
HALLMARK_EPITHELIAL_MESENCHYMAL_TRANSITION	0.183277	-0.0346474	5.25693	2.46542e-07	4.93085e-07	5.8316
HALLMARK_COMPLEMENT	0.151053	-0.0311611	5.22795	2.85405e-07	5.48856e-07	5.69011
HALLMARK_TNFA_SIGNALING_VIA_NFKB	0.166872	-0.038593	5.06055	6.56269e-07	1.21531e-06	4.88624
HALLMARK_DNA_REPAIR	0.148332	-0.0338096	5.04334	7.14047e-07	1.27508e-06	4.80487
HALLMARK_IL6_JAK_STAT3_SIGNALING	0.13553	-0.0322021	4.78327	2.48356e-06	4.13927e-06	3.60513
HALLMARK_TGF_BETA_SIGNALING	0.170724	-0.0341707	4.24543	2.75411e-05	4.44212e-05	1.30396
HALLMARK_ALLOGRAFT_REJECTION	0.149034	-0.0400593	3.82997	0.000150193	0.000234676	-0.302662
HALLMARK_PEROXISOME	0.0735079	-0.0219554	3.80315	0.000166746	0.000252645	-0.401137
HALLMARK_INFLAMMATORY_RESPONSE	0.12771	-0.0376135	3.56813	0.000406188	0.000597336	-1.23659
HALLMARK_WNT_BETA_CATENIN_SIGNALING	0.0787489	-0.0327852	2.4299	0.0155716	0.0222452	-4.56596
HALLMARK_UV_RESPONSE_DN	0.0766	-0.0323407	2.16918	0.0306971	0.0426349	-5.15689
HALLMARK_KRAS_SIGNALING_UP	0.0480877	-0.0268067	2.04958	0.0411008	0.0555416	-5.40611
HALLMARK_APICAL_SURFACE	0.0467642	-0.0314668	1.98959	0.0473628	0.0623195	-5.52592
HALLMARK_INTERFERON_GAMMA_RESPONSE	0.0732041	-0.0440387	1.92144	0.0554342	0.0710695	-5.65778
HALLMARK_REACTIVE_OXYGEN_SPECIES_PATHWAY	0.040699	-0.0407639	1.61383	0.107406	0.130983	-6.19678
HALLMARK_ESTROGEN_RESPONSE_EARLY	0.0324319	-0.0367349	1.44712	0.148698	0.172905	-6.45023
HALLMARK_ANDROGEN_RESPONSE	0.0227421	-0.0339255	0.828727	0.407786	0.463393	-7.15105
HALLMARK_INTERFERON_ALPHA_RESPONSE	0.0308141	-0.0377454	0.78373	0.433693	0.481882	-7.18725
HALLMARK_MYOGENESIS	0.0110241	-0.010931	0.42841	0.668599	0.692056	-7.40229
HALLMARK_SPERMATOGENESIS	0.00703757	-0.0138382	0.415225	0.678215	0.692056	-7.40784
HALLMARK_ADIPOGENESIS	-0.00825762	-0.0316572	-0.322802	0.747025	0.747025	-7.44192
HALLMARK_HEME_METABOLISM	-0.0124352	-0.017101	-0.511504	0.609299	0.648191	-7.36327
HALLMARK_CHOLESTEROL_HOMEOSTASIS	-0.0133549	-0.0414832	-0.564494	0.572756	0.62256	-7.3348
HALLMARK_OXIDATIVE_PHOSPHORYLATION	-0.0490333	-0.0356889	-1.58569	0.113653	0.135301	-6.24147
HALLMARK_ESTROGEN_RESPONSE_LATE	-0.0339513	-0.010161	-1.87729	0.0612551	0.0765689	-5.74081
HALLMARK_PANCREAS_BETA_CELLS	-0.097013	0.0201643	-4.86007	1.72836e-06	2.97993e-06	3.9536
HALLMARK_KRAS_SIGNALING_DN	-0.0816082	-0.00175807	-6.23935	1.18802e-09	2.97006e-09	11.0151
HALLMARK_ANGIOGENESIS	-0.265059	-0.0323976	-6.72762	6.46724e-11	2.30973e-10	13.8593
HALLMARK_COAGULATION	-0.333312	-0.00382817	-9.4024	5.41378e-19	5.41378e-18	32.1651
HALLMARK_XENOBIOTIC_METABOLISM	-0.305843	-0.0128392	-9.98364	5.71489e-21	9.52481e-20	36.6643
HALLMARK_FATTY_ACID_METABOLISM	-0.280193	-0.0289193	-10.7786	8.88404e-24	2.22101e-22	43.0647
HALLMARK_BILE_ACID_METABOLISM	-0.43159	-0.00399447	-12.2564	2.8328e-29	1.4164e-27	55.6093

## Sheet: Table S6
Table S6. ssGSEA scores for 1387 constituent pathways.（The samples were divided into two groups according to EPI in order, The first 179 samples belong to low EPI group,The next 180 samples belong to high EPI group)
sample	TCGA-DD-AACQ-01	TCGA-DD-AACO-01	TCGA-DD-AADS-01	TCGA-DD-AAEB-01	TCGA-ZS-A9CE-01	TCGA-DD-A3A2-01	TCGA-G3-A3CJ-01	TCGA-DD-AAW1-01	TCGA-DD-A4NP-01	TCGA-DD-AACW-01	TCGA-DD-AADG-01	TCGA-DD-A4NK-01	TCGA-2Y-A9HB-01	TCGA-BD-A2L6-01	TCGA-CC-A7IH-01	TCGA-G3-A25Z-01	TCGA-G3-A7M8-01	TCGA-EP-A2KB-01	TCGA-EP-A12J-01	TCGA-MR-A520-01	TCGA-DD-A4NI-01	TCGA-DD-AADJ-01	TCGA-DD-A4NF-01	TCGA-WX-AA46-01	TCGA-2Y-A9H4-01	TCGA-G3-AAV4-01	TCGA-DD-AAEE-01	TCGA-DD-A11A-01	TCGA-DD-AAE2-01	TCGA-RC-A7SB-01	TCGA-ZP-A9D4-01	TCGA-DD-AACG-01	TCGA-DD-AACE-01	TCGA-2Y-A9GZ-01	TCGA-DD-A1ED-01	TCGA-G3-AAV2-01	TCGA-XR-A8TF-01	TCGA-DD-A11B-01	TCGA-CC-A7IF-01	TCGA-DD-AAE1-01	TCGA-DD-AAE7-01	TCGA-DD-AADI-01	TCGA-K7-A5RF-01	TCGA-DD-A39W-01	TCGA-G3-A6UC-01	TCGA-DD-A39Z-01	TCGA-5R-AA1C-01	TCGA-ED-A4XI-01	TCGA-MI-A75H-01
G2_Phase	-0.198697	-0.135827	-0.223534	-0.240044	-0.254797	-0.242663	-0.227185	-0.165653	-0.238654	-0.0991428	-0.245536	-0.250888	-0.267777	0.251862	-0.171989	-0.258578	-0.258621	-0.169717	-0.146013	-0.23925	-0.291204	-0.255256	-0.161475	-0.265473	-0.165566	-0.264509	0.261293	0.0365272	-0.20962	-0.0241273	-0.173728	0.0882445	-0.173219	-0.194344	-0.293052	-0.242652	-0.15615	-0.163936	0.132744	-0.261604	-0.275884	-0.296326	-0.29867	-0.253408	-0.248737	-0.135012	-0.241563	-0.321664	-0.26464
Processive_synthesis_on_the_lagging_strand	0.0238233	0.233523	-0.0125931	-0.0158439	0.0231043	-0.0208221	-0.00578346	-0.0310644	-0.0394423	0.145949	0.0604388	0.00446526	-0.0427122	0.202213	0.129085	0.0107609	-0.0651172	0.0198242	0.00662445	-0.0307766	-0.111372	0.0289933	-0.044866	-0.0206919	0.148705	0.0393397	0.116238	0.0165513	0.103126	0.140099	-0.00267452	0.199524	0.0154605	0.00791187	-0.121074	0.0555219	0.0302756	0.0103011	0.108886	0.0214418	-0.050588	-0.00580981	-0.112258	0.0282557	0.123255	0.0483102	0.0758005	-0.172118	0.121161
Removal_of_the_Flap_Intermediate	0.0538018	0.195753	-0.0103779	-0.0128428	0.010377	0.00481536	-0.00360812	-0.0350215	-0.00335978	0.164118	0.0635689	0.0184631	-0.0221267	0.1839	0.100707	-0.00353734	-0.035109	0.0250876	-0.0118026	-0.0342945	-0.0897536	0.0448979	-0.0481932	-0.0290255	0.154658	0.0676001	0.132186	0.0349387	0.0741395	0.110368	-0.0174939	0.188259	0.0116467	0.0291202	-0.122901	0.0801327	0.0214694	-0.011073	0.152327	0.0339031	-0.054729	0.00505755	-0.119618	0.0233338	0.10389	0.0984243	0.0657663	-0.153251	0.112474
Ubiquitin-dependent_degradation_of_Cyclin_D1	0.158857	0.237074	0.288172	0.237329	0.254524	0.230042	0.301202	0.176404	0.236351	0.160095	0.197507	0.126068	0.245662	0.253089	0.200682	0.259801	0.169826	0.126635	0.185069	0.141926	0.12554	0.215017	0.145282	0.182378	0.271311	0.271289	0.261031	0.172376	0.177151	0.228621	0.147239	0.201752	0.119005	0.100695	0.0915929	0.195166	0.219184	0.106547	0.159306	0.155876	0.177329	0.214577	0.122118	0.182065	0.152539	0.266702	0.238642	0.0589923	0.238471
Establishment_of_Sister_Chromatid_Cohesion	-0.0738033	-0.0307528	-0.0754285	-0.0862352	-0.09723	-0.095765	-0.101551	-0.0337797	-0.121297	0.103627	-0.0625543	-0.0800919	-0.0657715	0.0240914	0.0890436	-0.101161	-0.101523	0.0524617	0.162256	-0.0772924	0.000352238	-0.126691	0.121885	-0.0525985	-0.110428	0.0304598	-0.132967	0.179415	-0.0269186	-0.0842423	0.0460017	0.0537023	-0.0795153	-0.0128966	-0.176995	-0.0766901	0.0220192	0.0413987	0.0372082	0.0501511	-0.101482	-0.167265	-0.14579	0.0732197	-0.0314911	-0.0628041	0.00248095	-0.130713	-0.146967
Association_of_licensing_factors_with_the_pre-replicative_complex	0.133657	0.147034	0.148625	0.100348	0.0667789	0.0451025	0.121395	0.0627845	0.120854	0.158506	0.071585	0.00973624	0.0707184	0.270517	0.0809774	0.116085	0.0542184	0.172511	0.0990151	0.034889	-0.0407668	0.109439	0.0671404	0.0559649	0.0973756	0.147327	0.223672	0.120186	0.0216663	0.104906	0.00659225	0.23348	0.0737841	0.0506506	0.0444332	0.117993	0.152724	0.0614165	0.280697	0.122416	0.0935384	0.0685759	-0.00532516	0.119586	0.122588	0.143669	0.0798537	-0.0324887	0.113534
Removal_of_licensing_factors_from_origins	0.133657	0.0893498	-0.0321974	-0.0312886	-0.0603472	-0.0758403	-0.0575064	-0.0499237	-0.0379216	0.218407	-0.0166942	-0.0835819	-0.0571563	0.288238	-0.0179405	-0.0450405	-0.0669185	0.099541	-0.0481344	-0.0408785	-0.133945	-0.0272268	-0.0305158	-0.107705	0.00781165	-0.0504794	0.0838199	0.0778814	-0.0431884	-0.0420015	-0.0727699	0.171607	0.0666854	-0.0128493	-0.135693	-0.024936	0.0500069	-0.0614098	0.177785	-0.0250676	-0.0937378	-0.0636445	-0.141626	-0.0604342	-0.0399859	0.0264132	-0.0154946	-0.149277	-0.00953037
extrinsic_prothrombin_activation_pathway	0.133657	0.183742	0.183439	0.174921	0.186021	0.162223	0.176561	0.150201	0.16397	0.144291	0.154293	0.153064	0.157886	0.18032	0.115221	0.178311	0.142769	0.14495	0.197332	0.160399	0.201244	0.164389	0.12334	0.20268	0.195334	0.107485	0.149382	0.14705	0.176937	0.171648	0.186649	0.15728	0.165941	0.132679	0.134827	0.156974	0.161996	0.188696	0.146494	0.178649	0.183793	0.167136	0.141768	0.162447	0.156779	0.16636	0.155804	0.160779	0.15334
IL23-mediated_signaling_events	0.133657	-0.100779	0.0316582	-0.0440201	-0.0580633	-0.0274908	-0.0726567	-0.0386117	-0.0243567	-0.0128051	-0.0689611	-0.0350722	0.0628651	0.030054	-0.102769	-0.117158	-0.0333445	-0.0159576	-0.0840552	0.053737	0.208334	0.0483822	-0.104213	0.0198551	0.00879457	-0.0783529	-0.0549931	-0.0895911	0.0800139	-0.0289529	-0.0550184	-0.025933	-0.0566669	-0.0617624	0.288693	-0.0942527	-0.0599281	-0.00702245	-0.0873823	-0.00858777	0.0587007	0.22274	0.266487	-0.0171524	-0.0464885	-0.0899195	-0.0734262	0.283125	0.0256089
il-7_signal_transduction	0.133657	-0.0493087	0.0322605	-0.0508661	-0.0492615	0.0151167	-0.0890624	-0.0264687	-0.0588452	-0.0362462	-0.0543942	-0.035474	-0.0198908	-0.00710142	-0.113928	-0.101004	-0.110041	-0.0357345	-0.0975728	0.0352306	0.0399149	-0.0507347	-0.0159139	-0.0564058	-0.116073	-0.0481415	-0.061537	0.00277967	0.0213437	0.00812784	-0.0457929	-0.0783586	-0.00805706	-0.0251644	0.00194906	-0.0682353	-0.052625	0.0460565	-0.0732889	-0.0341738	-0.0130995	-0.0177666	0.0574495	0.031179	-0.0697096	-0.117448	-0.0600146	-0.0157479	0.00547261
growth_hormone_signaling_pathway	0.133657	0.0407747	-0.0405068	0.0198794	0.00890685	0.0437164	0.00416829	-0.00731516	0.00847205	0.042111	-0.00946681	-0.00708883	-0.0210545	0.0523792	0.00939101	-0.0383083	-0.00855133	0.0780992	0.0187165	0.0188486	0.0788474	0.031789	0.0253002	0.0759603	0.0490054	0.0101653	0.0196574	0.0525155	0.00312214	0.0361893	0.0115873	-0.0264239	0.0363643	0.0263646	0.107813	0.0141828	-0.00344795	0.054828	0.0437302	0.0491008	0.0174169	0.0308192	0.0755725	0.0650346	0.0314889	0.00593356	0.0419585	0.0282986	0.0183293
CDO_in_myogenesis	0.133657	-0.0584379	-0.0528731	-0.0208797	-0.0493878	-0.0280001	0.0373212	0.0703211	0.0384077	-0.075609	-0.0084507	-0.0690071	-0.00808611	-0.0554357	0.00364928	0.0463229	-0.00820911	0.0638709	0.0168207	-0.0662944	-0.0077708	-0.106969	-0.0449267	-0.0032998	-0.0345552	0.0922954	0.0238175	0.0826523	-0.0988881	0.0704908	-0.0258145	-0.0785026	0.0870842	0.0424037	0.115973	0.0568396	-0.0234593	-0.0549789	-0.0109812	-0.0286637	0.0112206	-0.0613694	0.000855515	0.0284507	0.0421577	-0.0253085	-0.0170704	0.0581993	0.0152972
G_alpha_(s)_signalling_events	0.133657	0.0633281	0.0694255	0.120208	0.0508334	0.0721381	0.0884423	0.048134	0.0915179	0.0135949	0.0783999	0.0752852	0.0876238	0.0864241	0.0874562	0.0780505	0.0815973	0.0237007	0.0419921	0.0503537	0.0929034	0.0509722	0.0594092	0.0968208	0.0913943	-0.00531373	0.0868934	0.0603347	0.0677658	0.10152	0.0190148	0.014682	0.0192205	0.0751203	0.110357	0.0900999	0.0156468	0.0733033	0.0811807	0.0185	0.101996	0.0749672	0.117549	0.00955414	0.05196	0.0296777	0.0382542	0.104748	0.0952376
Opsins	0.133657	0.0689341	-0.0102769	0.26484	0.209907	0.11023	0.0922013	0.267804	0.19608	0.239797	0.275505	0.245569	0.226133	0.254684	0.246094	0.0637093	0.133491	0.268906	0.177595	0.0459234	0.127813	0.183639	0.233934	0.146056	0.269013	0.184876	0.17806	0.267939	0.194628	0.156093	0.180395	0.143776	0.281171	0.17642	0.1958	0.283286	0.305128	0.203024	0.201167	0.205368	0.217456	0.113571	-0.0618432	0.193672	0.230972	0.174318	0.289722	-0.0185741	0.195692
Free_fatty_acid_receptors	0.133657	0.221773	0.101237	0.216815	0.0967099	0.166067	0.201033	0.163275	0.0997912	0.171134	0.197931	0.0905832	0.0625406	0.0615255	0.15897	0.0757487	0.182053	0.0853711	0.0904696	0.0976574	0.0412702	0.092972	0.195901	0.180002	0.0832244	0.264154	0.167833	0.15041	0.0242731	0.147742	0.0856921	0.307528	0.109208	0.175831	0.11383	0.0964259	0.108316	0.081783	0.0742233	0.0811713	0.0565157	0.11868	0.207493	0.177528	0.0956653	0.222404	0.103178	0.103384	0.178616
Adenosine_P1_receptors	0.133657	0.168075	-0.20287	-0.343967	0.0290014	0.00124342	-0.0640656	-0.0903101	-0.358303	-0.129981	0.00425592	0.0874911	0.231831	-0.115368	0.2769	0.0712246	0.060819	-0.383048	0.176162	0.195649	0.11283	-0.000404894	0.0157906	-0.35261	-0.0947909	0.0120169	-0.0974735	-0.338426	0.0097783	-0.0772319	0.0332225	0.159282	-0.0612041	0.00447437	-0.0343476	0.0273366	-0.347414	-0.364853	0.0207465	-0.118195	0.251403	0.113904	0.174849	-0.128578	-0.0803702	-0.0659377	0.0161269	0.0826657	-0.104193
Lysosphingolipid_and_LPA_receptors	0.133657	-0.0661195	0.144478	0.0842673	-0.12797	0.0858897	-0.0494427	-0.0429338	-0.0161572	-0.063818	-0.144227	-0.0511357	-0.052011	0.0500204	-0.141515	-0.0131052	-0.13636	-0.13208	-0.13301	0.00129062	0.145444	0.20156	-0.0431225	-0.144005	0.0412277	-0.134758	-0.158283	-0.0198976	0.00454913	0.132373	0.061448	-0.147365	-0.136889	-0.015661	0.0741915	-0.128118	-0.13796	-0.0141369	-0.0801219	-0.0575978	0.0740358	0.121543	0.0885541	-0.134501	-0.134906	0.153237	-0.0368783	0.103181	0.0841614
Glucagon-type_ligand_receptors	0.133657	0.0846347	0.146654	0.135198	0.0783951	0.05785	0.118582	0.0494752	0.158451	0.0876447	0.0437577	0.04701	0.0845573	0.13655	0.0590131	0.0449516	0.143007	0.0460657	0.0304842	0.11635	0.093841	0.150921	0.0795614	0.0324248	0.165601	0.0366076	0.127953	0.128333	0.0453791	0.115307	0.0501005	0.135749	0.0331979	0.0822922	0.103029	0.0701034	0.0835948	0.0681681	0.105197	0.076951	0.0739165	0.092379	0.097826	0.0482638	0.0639364	0.104646	0.0919749	0.0393428	0.101773
Class_C/3_(Metabotropic_glutamate/pheromone_receptors)	0.133657	0.170364	0.0771592	0.0788467	0.063227	0.093195	-0.0639964	0.137136	0.153758	0.145039	0.109818	0.175461	-0.103638	-0.061695	-0.0399541	-0.0104715	0.130532	0.0840548	0.070953	0.0534043	-0.0732853	0.153921	0.204019	0.0464736	0.119041	0.00719728	0.0405375	0.154022	0.0247771	0.209288	0.14282	0.144797	0.0883112	0.0982581	0.0764327	0.117356	0.107818	0.135175	0.133277	-0.00499275	0.118175	0.173838	0.0883975	-0.084768	0.157972	0.0804217	0.118517	0.0604813	0.134402
Class_B/2_(Secretin_family_receptors)	0.133657	-0.0348879	-0.07758	-0.0342443	0.0403387	0.0844904	-0.0417762	-0.0322122	0.0165561	-0.032165	0.0180275	-0.00253844	0.0391193	-0.0345699	-0.0166283	-0.00743544	-0.0190574	-0.0499639	0.0484701	-0.00924697	-0.0317129	-0.0388246	-0.00311067	0.0549368	0.0265069	-0.0315717	-0.0090408	0.0130565	-0.0422599	-0.033828	-0.03199	-0.11021	-0.029104	-0.0307557	0.0554513	-0.0783835	0.0155963	-0.0269178	0.00772733	-0.075262	0.0637196	0.0585135	0.0391721	-0.038197	-0.00674985	0.0162454	-0.0439189	0.0598642	0.0359776
Calcitonin-like_ligand_receptors	0.133657	0.0779423	0.0228454	0.0322353	0.0423339	-0.04403	0.195683	0.055276	-0.0108095	0.00828514	0.164246	0.142231	0.236168	0.309739	0.173802	0.209016	0.0312055	-0.0349307	0.0989031	-0.124708	0.161525	0.0663804	0.0266207	0.233921	0.176094	-0.0350973	0.155603	0.123113	0.251835	0.280443	-0.0706003	-0.0500039	0.060432	0.114359	0.155792	0.202213	-0.011719	0.123965	0.170763	0.00122539	0.152119	0.202357	0.163975	-0.0305664	0.10961	-0.0350979	0.0237564	0.214172	0.190301
chromatin_remodeling_by_hswi/snf_atp-dependent_complexes	0.133657	-0.0247141	-0.0904294	0.0180491	-0.0184641	-0.125592	0.0040704	0.0442197	-0.101541	0.0487684	0.00763367	-0.021952	-0.078922	-0.0260814	-0.0491188	0.0421911	-0.0797356	0.032147	0.00929243	-0.11003	-0.0141744	-0.0949245	0.00163943	0.0211055	-0.0792337	-0.00519214	-0.0576756	0.0404661	0.040475	0.0271871	0.0804692	-0.080477	0.0272745	-0.0243135	-0.0858725	0.0305035	-0.0627498	-0.0420263	-0.0103731	-0.00814939	-0.0822325	0.0888524	-0.0819896	0.105874	-0.0976812	-0.0831509	-0.00643326	-0.0938312	0.0648575
how_does_salmonella_hijack_a_cell	0.133657	0.0719416	0.140882	0.0640758	-0.10208	0.00831224	0.0950759	-0.0577473	0.0435309	0.125978	-0.0254848	0.0104865	-0.0181311	0.103091	0.0833355	0.133186	-0.104956	0.0724681	-0.050117	-0.0694119	-0.0341464	0.0618649	0.0475295	-0.0454364	-0.044182	-0.0314293	0.0296115	0.0133952	-0.153277	0.044646	-0.0212745	0.21044	0.0298083	-0.0244191	-0.0485708	-0.01821	0.0302902	0.0440609	-0.00468522	0.0861784	0.0209908	0.105205	-0.10818	0.0080552	-0.0174452	0.110652	0.0982304	-0.0523201	0.0341152
sprouty_regulation_of_tyrosine_kinase_signals	0.133657	0.103232	0.0709584	0.0728698	0.0279127	0.0457168	0.0712415	0.0738834	0.0256395	0.0499626	0.0363995	0.0387723	0.1028	0.0988405	0.0755675	0.0438016	0.0324307	0.0274457	0.0782059	0.0187801	0.0264772	0.0459247	0.0944802	0.0615825	0.119594	0.100308	0.0184987	0.0230277	0.0709325	0.0427498	0.00876659	-0.00226938	0.0736053	0.0745267	0.0733893	0.0839247	0.106275	0.0371327	0.0439619	0.0311503	0.0633412	0.0556485	0.0260387	0.0797078	0.0446432	0.0462016	0.0418014	0.0524591	0.0526077
erythropoietin_mediated_neuroprotection_through_nf-kb	0.133657	0.0161015	0.0258147	0.0544686	0.0115611	0.0987315	0.124775	0.0190155	-0.0128336	0.00834908	0.0207892	0.0945057	0.0159929	0.0641811	0.0568597	0.0846839	0.0970922	0.014139	0.0118739	0.0222222	0.205026	0.0365349	0.0691118	0.149687	0.0531796	-0.0316901	-0.0451343	0.116548	0.0390794	0.11093	0.150776	-0.0372531	0.0572741	0.101864	0.24016	0.0156501	0.01617	0.118857	0.0247552	0.105178	0.0680698	0.129283	0.242803	-0.0207276	0.011356	0.0175599	0.0786797	0.200041	0.0427569
the_information_processing_pathway_at_the_ifn_beta_enhancer	0.133657	0.00568743	0.016956	0.0464548	0.0340965	-0.0428329	0.0376685	0.0704478	-0.0297458	0.0362733	0.0417316	0.0262739	-0.00163217	0.0102568	0.042801	0.0812376	-0.0307127	0.0903269	0.0628234	-0.0595836	0.116294	-0.0479219	0.0238633	0.0916686	-0.0079605	0.033044	0.0373936	0.0816268	0.0468604	0.0474332	-0.000301074	-0.0142694	0.0980299	0.0439937	0.0734749	0.0748445	-0.0344315	-0.00375821	0.0305742	0.0102589	-0.0428831	0.0959008	0.0446347	0.0387854	-0.0214263	-0.0446129	-0.0112673	-0.0503295	0.0688801
role_of_erk5_in_neuronal_survival_pathway	0.133657	-0.0449098	-0.153471	-0.0293419	-0.0927193	0.00525409	0.00990823	-0.0531324	-0.00783993	-0.0829778	0.00924691	-0.0437935	-0.0350071	0.0160544	-0.0038904	-0.0724981	-0.0772449	-0.0364945	-0.056726	-0.00729006	0.020907	-0.00152804	0.00244539	-0.0313712	0.0343091	0.0102511	-0.00376845	-0.0135479	-0.0349747	-0.0219689	-0.0629386	-0.114783	0.0156831	-0.0517296	0.100831	-0.00693798	-0.036848	-0.00399982	-0.0185802	-0.0508168	-0.0750277	0.00585132	-0.00695519	-0.00133994	-0.0592361	-0.0335901	-0.0463755	0.0393384	-0.0555142
egf_signaling_pathway	0.133657	0.081766	-0.0333722	0.0428412	0.0334716	0.0676793	0.0195573	0.0399376	0.00513907	0.0390309	0.0288604	0.0456435	0.0122371	0.0517777	0.0431568	0.017827	0.0296031	0.0559456	0.0245837	0.0675387	0.0976061	0.0278326	0.088459	0.045751	0.0572474	0.0756789	0.00760062	0.0902912	0.0719252	0.073766	0.0378957	0.00330841	0.0952135	0.0843196	0.111743	0.0192439	0.0578104	0.0719684	0.0472516	0.0576	-0.0283581	-0.00488177	0.0331419	0.137191	0.02025	0.0316224	0.0781288	0.111586	-0.00157607
repression_of_pain_sensation_by_the_transcriptional_regulator_dream	0.133657	-0.0832702	0.0143069	-0.0372148	-0.0249315	0.0542268	0.0700305	0.0594355	0.0483777	-0.0386287	0.0198719	0.0206252	0.0578969	0.00318408	0.115745	-0.01457	0.0580426	0.041803	0.13395	-0.0258914	0.0363636	-0.0328048	0.198372	0.0781364	-0.0408779	0.0517542	0.0342501	0.0876097	-0.0104961	0.00583327	0.122031	-0.0338568	0.150733	0.0292556	0.11951	0.0486192	0.0230038	0.0318303	-0.0583343	0.00254209	0.01057	-0.0332826	0.0802101	0.0757482	0.0652817	-0.0321234	0.113719	0.0976451	0.0619698
adp-ribosylation_factor	0.133657	-0.0543999	-0.0486999	-0.0270879	0.0407616	-0.0218183	0.00505707	0.0228929	-0.0538918	-0.011112	0.0177874	-0.00174647	0.0215427	-0.0456176	-0.0153675	-0.0416184	0.0130361	0.0197616	0.0143422	-0.00795748	0.000993079	-0.0245572	0.025977	-0.0147061	-0.0727161	-0.033847	-0.0364254	-0.0227996	-0.0133145	0.0369055	0.00329398	-0.0726799	0.00316844	-0.00166676	0.0161749	0.0388535	-0.00732052	0.0417525	0.0606756	0.0315835	-0.00958918	0.015275	0.000562495	-0.00670435	-0.0304385	-0.051063	-0.0245448	0.0228251	0.020345
EPHA_forward_signaling	0.133657	-0.00280408	0.031194	0.0319879	-0.00402775	0.0552011	0.00469414	-0.0444357	-0.0231237	0.00655426	0.00142022	0.0974416	0.074789	0.0256477	-0.0460933	-0.0069106	0.0454957	-0.0760813	-0.0110873	0.0781681	0.107445	0.040643	-0.015603	0.0328418	-0.0104261	-0.0232668	-0.0449259	0.0692443	0.117826	0.0329031	0.00406841	0.0108239	-0.00196181	0.0362964	0.0603353	-0.00175915	-0.0275928	0.0542172	0.0363571	0.0189147	0.0696585	0.0451131	0.104193	0.0130201	0.0197809	0.0384669	-0.0324859	0.0255252	-0.0317942
induction_of_apoptosis_through_dr3_and_dr4/5_death_receptors	0.133657	0.0144146	0.0820512	-0.0302954	0.129487	-0.00258895	-0.0184582	-0.0201438	0.0419375	0.148355	0.00878711	0.0547055	0.134742	0.178357	-0.0206959	0.19425	0.113151	0.111138	0.0214339	0.0311501	0.105402	0.079819	0.0147561	0.125398	0.117751	0.0522965	0.187546	0.0910379	0.0962246	0.137061	0.00595209	0.0448194	0.0946764	0.062427	0.0509806	0.0513208	0.0253794	0.119653	0.123238	0.123298	-0.00810908	0.0712212	0.0763963	0.00933182	0.0162574	-0.0246702	0.0592347	0.0821406	0.0169756
activation_of_csk_by_camp-dependent_protein_kinase_inhibits_signaling_through_the_t_cell_receptor	0.133657	-0.0221833	0.127889	-0.0478156	-0.0852283	-0.0089652	-0.106996	-0.0653381	-0.0536967	-0.0200263	-0.0912342	-0.0344541	0.10881	0.0150793	-0.0515239	-0.125303	-0.0275711	-0.0456267	-0.0357038	-0.0807203	0.221232	-0.0264575	-0.0757502	-0.0389886	0.00872241	-0.117979	-0.0789901	-0.0402767	0.195966	0.00232985	0.00941441	-0.0557421	-0.0118852	-0.0868376	0.217886	-0.024498	0.0346345	-0.0552432	-0.000312263	-0.0767723	0.0743474	0.182034	0.195736	0.0207391	-0.0213226	-0.119291	0.0266439	0.196764	0.201027
Canonical_Wnt_signaling_pathway	0.133657	0.0415205	-0.0293741	-0.0240535	0.004268	-0.00236735	-0.00379728	0.0237844	0.0100454	0.211537	0.0132182	-0.00294868	0.0116318	-0.0136594	0.0728311	-0.0339519	0.0366248	0.160077	0.0954166	0.0511564	0.0132434	0.0290328	0.127805	-0.0479396	0.118503	0.011846	0.0348997	0.0969009	0.00406443	0.168294	0.129072	0.00331884	0.0928022	-0.0187625	-0.0322705	0.0482504	0.132307	0.0474232	0.121511	0.0369377	0.00239746	0.0373064	-0.0812464	0.151275	0.0482732	-0.00420196	0.0114742	-0.0147261	-0.0441753
tpo_signaling_pathway	0.133657	0.0283298	-0.0141546	-0.0375345	0.00765493	0.0294807	0.000295511	0.0101916	-0.00283994	-0.019089	-0.00307307	0.00142997	-0.062503	0.0120004	-0.0238614	-0.013382	0.0231366	0.00276832	0.0234276	0.0321343	0.102156	-0.0210492	0.0108025	-0.00410535	0.0201797	0.0854542	-0.0565945	0.029591	0.0675307	0.049596	-0.0130847	0.011235	0.0737757	0.048341	0.151943	-0.0048368	0.0113014	0.0364801	-0.00383696	-0.00807269	-0.0451159	0.0236077	0.149851	0.0939044	0.0479782	-0.0390195	0.0353184	0.111617	0.0370317
Signaling_events_mediated_by_PRL	0.133657	0.00259132	0.0463189	-0.0551304	0.045472	0.0776174	0.0434211	0.0605469	0.00926625	-0.0107986	0.045569	0.0771881	0.0894407	0.133731	0.0333653	0.0665213	0.110362	-0.05376	0.0435634	0.098281	0.0328259	0.00953751	0.0208875	0.101035	0.148471	0.0555278	0.0337983	0.0668859	0.154961	0.0570117	0.0529538	0.0206611	0.145023	0.0886441	0.160604	0.0284289	0.0586426	0.0331828	0.0235629	-0.00811144	-0.03243	0.0471243	0.0798534	0.0376017	0.0889855	0.0180332	0.0232429	0.0690732	-0.0241677
Nephrin/Neph1_signaling_in_the_kidney_podocyte	0.133657	-0.00440243	0.0138088	0.0105072	0.0249456	0.0571637	0.0132216	-0.0100484	0.0503741	0.025714	0.0170966	-0.00154673	-0.0128156	0.00559735	0.0015261	0.0102847	0.0168287	0.042307	-0.0257868	0.0164296	0.0607784	0.0142104	0.0216468	0.00850776	0.0186287	0.0695277	0.0187231	0.0456071	0.00106978	0.0614829	0.0318525	0.033478	0.0944208	0.0379593	0.0288631	0.00329652	0.0213286	0.0448836	0.00670892	0.018776	-0.0378269	-0.0150123	-0.0340336	0.0339387	0.0160042	0.0228525	0.025068	-0.0142709	0.0089144
Osteopontin-mediated_events	0.133657	-0.0168445	0.027734	-0.0326363	0.0362277	0.0335716	-0.0217225	0.0333303	-0.0458986	-0.0173219	-0.00101635	-0.00203299	-0.063988	0.000911311	0.0133601	0.00661937	0.0129879	0.0447081	-0.0164362	0.0255109	-0.0116475	0.0215987	0.00649178	0.0167511	0.00481756	0.0810809	0.0127619	0.0731548	0.0374906	0.016504	-0.00682213	0.0151448	0.0958462	0.013598	0.0855152	-0.00294037	-0.0278104	0.039065	-0.054528	0.0101066	-0.0454611	-0.0613574	0.0444625	0.0156416	-0.0109414	-0.0283826	0.0998619	0.0286175	0.0102202
cardiac_protection_against_ros	0.133657	0.157138	0.0761541	0.125464	0.158584	0.160972	0.097698	0.10836	0.108128	-0.00103809	0.15819	0.183634	0.103484	0.245169	0.220793	0.127318	0.0663736	0.0792948	0.117433	0.199268	0.185634	0.144356	0.165379	0.182157	0.183785	-0.0263271	-0.00228876	0.157415	0.207562	0.185924	0.171616	0.000430535	0.176386	0.199581	0.0948864	0.101395	0.0419536	0.205982	0.0837448	0.140367	0.106556	0.047247	0.271985	0.0634002	0.22121	0.0513287	0.183033	0.147813	0.0550172
Retinoic_acid_receptors-mediated_signaling	0.133657	-0.0507091	-0.0379754	0.0686821	0.0496372	0.0753101	0.0805711	0.035573	0.0643076	0.0828107	0.0844053	0.0497506	0.0972998	0.0289557	0.0226445	0.0942608	0.0365931	0.133687	0.0226129	-0.000695281	0.0447721	0.0226867	0.0443993	0.193997	0.0579543	0.118296	0.0846388	0.0904989	-0.01222	0.0473389	0.0778479	0.0294676	0.0604042	0.113409	0.154877	0.0314929	0.0676773	0.0984253	-0.0267786	0.0302136	0.0165863	0.00699607	0.0702491	0.063213	0.0474313	0.00569303	0.108492	0.082488	0.0674603
Regulation_of_Insulin_Secretion_by_Glucagon-like_Peptide-1	0.133657	0.00113324	0.0707365	0.0808465	0.0250758	0.0346924	0.0373165	0.044551	0.0817287	0.0209819	0.0683802	0.0800153	-0.0399586	0.00648475	0.0669053	0.0273156	0.0908643	0.0204742	0.0127788	0.00882766	0.0511218	0.0515623	0.0320076	0.0774355	0.110863	0.0285141	0.0673674	0.0744237	0.0713775	0.0762398	0.0844861	0.033426	0.0518713	0.0687437	0.104783	0.0495978	0.069241	0.0124586	0.0441735	-0.0360517	0.056724	0.0462922	-0.000180476	0.0474597	0.0721035	0.0541817	0.0424562	0.0500547	0.066545
Regulation_of_Insulin_Secretion_by_Fatty_Acids_Bound_to_GPR40_(FFAR1)	0.133657	-0.0232022	0.0297892	0.00179979	-0.0068074	0.0952394	0.00821185	0.126713	0.0236156	-0.0779701	0.0663087	0.100213	0.0367967	-0.0100705	0.0981608	-0.0845947	-0.0309058	0.0593833	0.150523	-0.0931646	0.0769552	-0.0593722	-0.0203949	0.0612404	-0.0747096	0.0370788	-0.0620173	-0.126561	0.104789	0.11323	0.1069	-0.0601577	0.134384	0.0510616	-0.0604817	-0.0234105	-0.0577757	-0.000326822	-0.119069	-0.0634863	0.00264628	-0.0334586	-0.0547942	0.0904538	0.155893	-0.0827665	-0.0801362	-0.0641559	-0.00593864
PKA_activation_in_glucagon_signalling	0.133657	-0.117656	-0.052362	0.0282783	-0.0393893	0.0483664	-0.0384863	0.0202611	-0.000646655	-0.0724566	0.0196102	0.146734	-0.106479	-0.0732724	0.105104	0.0284349	0.109011	-0.014943	0.0305785	-0.0352018	0.065027	-0.0866094	0.0665622	0.131314	-0.00111769	-0.00107688	0.0536397	0.0645701	0.000486564	0.0230633	0.126476	-0.0859092	0.125819	0.0607532	0.0659845	0.0593456	0.0295277	-0.0120015	-0.00445726	-0.0939387	0.0302915	-0.0406111	0.00581631	0.11014	0.0634962	-0.0981252	0.0239	0.111369	0.0214219
Glucagon_signaling_in_metabolic_regulation	0.133657	-0.00622695	0.0781316	0.0799541	0.0163793	-0.00597326	0.0658346	0.0536029	0.0770942	0.0177943	0.0676275	0.0583309	-0.00913111	-0.00273553	0.061981	0.0576082	0.11577	0.0130513	-0.0645455	0.00907719	-0.00365688	-0.00431431	0.0525287	0.0761948	0.117174	0.0063804	0.106713	0.050926	0.0306769	0.033795	0.0629801	0.061947	0.0555156	0.0767183	0.0589534	0.0139988	0.0309923	-0.0624122	0.0775553	-0.0520504	0.0727612	0.0245204	0.010539	0.00445965	0.0506192	0.0172757	-0.0640628	0.0872514	0.02705
Inhibition_of_Insulin_Secretion_by_Adrenaline/Noradrenaline	0.133657	-0.0713108	0.0213674	0.00517313	-0.0761239	-0.118527	-0.0613357	-0.0188494	0.0410228	-0.0381419	-0.0550894	-0.062472	-0.0711025	-0.0571425	-0.0314909	-0.0406682	0.0116335	-0.0843403	-0.0654204	-0.0422946	-0.0375928	0.0294243	-0.0468646	-0.0486217	0.0528341	-0.033576	0.0739015	-0.0628024	0.0293141	-0.0194054	-0.0189252	-0.0402816	-0.0872161	0.00609983	0.00684479	-0.00270644	-0.0250714	-0.0789602	-0.0455602	0.00372551	-0.030905	0.060305	0.0232331	-0.0177551	0.0319308	-0.0589521	-0.0672533	-0.0200519	-0.0641754
Regulation_of_Insulin_Secretion	0.133657	-0.014745	0.0169857	0.0416117	0.0232328	-0.0144568	-0.0212514	0.0204598	0.0307137	-0.0283806	-0.027997	0.0131975	0.0151724	-0.0271692	0.0201425	-0.0387475	0.0210748	-0.00697509	0.0218077	0.0211577	0.0153445	0.114318	0.000942091	-0.00230025	0.014963	-0.00135031	0.000940857	-0.0335216	-0.00714236	0.0431634	-0.0231323	-0.0085623	-0.0249884	0.0323145	-0.00118934	0.0426122	0.0635876	0.0238175	-0.047249	0.0965253	0.0166451	0.0503731	-0.0251401	-0.0169596	0.0331293	0.0300784	-0.00387941	-0.0287544	0.00965857
Regulation_of_Insulin_Secretion_by_Acetylcholine	0.133657	-0.0216339	-0.0768864	0.0534156	0.0505915	0.0402666	-0.0191304	0.161735	-0.00446337	-0.0549564	0.114268	0.144538	-0.0662413	0.0242739	0.0673474	-0.131919	0.0072038	0.0697054	0.119954	-0.141539	0.0579159	-0.0272933	0.0381816	0.00864565	-0.0339107	0.0117649	0.00624184	-0.0820349	0.157571	0.137388	0.143864	-0.0823849	0.101612	0.104464	-0.0163591	0.0333554	0.00440257	-0.0243968	-0.133087	0.00187333	-0.0216556	-0.0500167	-0.0995846	0.0596867	0.124729	-0.105227	-0.10268	-0.108365	-0.0263074
proteasome_complex	0.133657	0.212411	0.239127	0.200124	0.214525	0.213401	0.248313	0.147268	0.228166	0.135123	0.180824	0.163575	0.21559	0.214367	0.19977	0.220839	0.159697	0.135986	0.201006	0.169793	0.0945551	0.187422	0.176278	0.174376	0.203521	0.244462	0.218244	0.188177	0.155891	0.191824	0.1541	0.166625	0.132019	0.139588	0.104926	0.176094	0.249947	0.152562	0.191989	0.129443	0.175293	0.194986	0.0840094	0.213037	0.211029	0.219668	0.203233	0.0452052	0.188381
PKA-mediated_phosphorylation_of_key_metabolic_factors	0.133657	0.216424	0.275601	0.295578	0.213554	0.289095	0.289044	0.193386	0.291774	0.217646	0.220729	0.294825	0.27289	0.268007	0.256558	0.22296	0.216288	0.215381	0.271332	0.233668	0.3043	0.234585	0.259937	0.259176	0.319283	0.254565	0.21897	0.222576	0.212283	0.240465	0.273222	0.201295	0.240254	0.261693	0.257416	0.212631	0.291339	0.217168	0.115518	0.225135	0.257641	0.250008	0.199066	0.280585	0.272373	0.240182	0.269323	0.178918	0.33471
Apoptotic_cleavage_of_cellular_proteins	0.133657	-0.0670577	-0.121832	-0.0707276	0.0248052	-0.125698	-0.0561402	0.0354152	-0.0306925	0.104933	-0.0132065	-0.0525673	0.136733	0.0268853	-0.0897817	0.0324967	0.0413199	0.0419665	0.0272337	0.0171329	0.102188	0.00536913	-0.0245983	-0.0084355	0.0349917	-0.0378306	0.160154	0.121503	0.0220657	-0.0464021	-0.0467735	-0.0158987	-0.0709976	0.0549442	-0.10434	-0.0740665	-0.0258521	0.0575566	0.0765449	0.0881381	-0.00369196	-0.0134458	-0.0256898	0.0283248	0.0162885	-0.0477845	0.0558483	0.0422061	0.0236856
Apoptotic_execution__phase	0.133657	-0.329683	-0.281256	-0.292357	0.385041	-0.295547	-0.287483	0.235395	-0.296283	0.239661	0.241617	-0.307306	0.218905	-0.319163	-0.318321	0.2324	-0.308907	-0.318335	-0.29931	-0.290119	-0.323054	-0.23946	-0.309472	-0.319161	-0.30231	0.250662	0.402807	0.367804	-0.372157	0.223669	-0.309362	0.246836	-0.322843	0.225349	-0.339456	-0.299657	0.266023	0.240977	0.235159	0.238471	-0.329008	-0.368493	-0.341829	0.24814	0.253136	-0.286199	0.407009	0.127457	0.221713
Activation_of_caspases_through_apoptosome-mediated_cleavage	0.133657	-0.0864131	0.0590434	-0.0849018	0.148213	0.0492195	-0.0752048	-0.0281356	-0.00764119	-0.0442345	-0.0223232	-0.0979295	0.236801	0.194613	-0.0321174	0.130416	0.216337	0.129566	-0.0162725	0.0225978	0.19053	0.143409	-0.0271768	0.00123846	0.169405	-0.0205599	0.294809	0.127922	0.0879256	0.114751	-0.0247562	0.0370062	0.0650369	0.120279	-0.0620139	0.0304049	-0.0959645	0.0957122	0.0785139	-0.0441324	0.0527366	-0.164386	0.0430016	-0.0202191	0.0273688	-0.0729294	0.0655471	-0.0974049	-0.0360548
SMAC-mediated_dissociation_of_IAP_caspase_complexes	0.133657	-0.079148	0.00181087	-0.0928952	0.0956032	-0.0222623	-0.070072	0.152655	-0.00836519	-0.0120145	-0.0350139	-0.164554	0.121948	0.0880462	0.0405724	0.0415773	0.0970963	0.0585553	0.0573323	-0.0208407	0.0533976	0.0564869	0.155798	0.0849593	0.220418	-0.0417969	0.181399	0.213639	-0.0072265	-0.082572	0.0917011	-0.0397431	-0.0601159	0.218991	0.00344515	0.16256	0.0446776	0.102273	0.00886704	-0.0299368	0.00563546	-0.138681	-0.0376683	0.0965104	0.037403	-0.14043	0.182734	-0.0156886	-0.0375044
SMAC_binds_to_IAPs	0.133657	-0.0747438	0.0100792	-0.0904547	0.109574	-0.0145423	-0.0678454	0.133287	0.000554535	-0.000611292	-0.0269588	-0.165683	0.14062	0.104684	0.0528694	0.0550898	0.113688	0.0726842	0.0693109	-0.0124376	0.0693449	0.0697055	0.13608	0.0815156	0.208038	-0.0337927	0.203364	0.199688	0.00649058	-0.0748638	0.0866981	-0.0317978	-0.0551913	0.205775	-0.000126782	0.14297	0.01094	0.0782605	0.0212334	-0.0204423	0.0184464	-0.133988	-0.0253236	0.0915576	0.0476607	-0.14177	0.165075	-0.0186746	-0.0287548
Release_of_apoptotic_factors_from_the_mitochondria	0.133657	0.372353	0.368574	0.267752	0.114205	0.259656	0.384535	-0.0202585	0.144319	0.12891	-0.0132942	0.122377	0.134122	0.13348	-0.211452	0.353521	0.220319	0.128178	-0.190222	0.248799	0.208254	0.364754	-0.0175246	0.229311	0.358019	-0.0104985	0.288769	0.233928	0.0861939	0.0854494	-0.0153951	0.240184	0.130486	-0.0282794	0.0560749	0.00172835	0.3277	0.35431	0.230148	-0.0204293	-0.0530943	0.24194	0.0492904	-0.0123466	-0.180791	0.124174	0.0115643	-0.132794	0.114779
Formation_of_apoptosome	0.133657	-0.0194204	0.205325	-0.0180771	0.199662	0.202607	-0.012802	0.109116	0.132232	-0.139131	0.116154	-0.0308305	0.188135	0.144435	0.103367	0.178854	0.17103	0.157299	0.122743	-0.0316216	0.147285	0.194815	0.112677	-0.0603244	0.228232	0.121783	0.21913	0.174472	0.100353	0.2852	0.116663	0.18772	0.219866	0.167145	0.0744738	0.181101	-0.0406223	0.0733958	-0.0378068	-0.140358	0.0827564	-0.109842	0.0638422	0.121349	0.174518	-0.0141694	0.136855	-0.224827	0.0966775
Role_of_Abl_in_Robo-Slit_signaling	0.133657	-0.0877361	-0.202489	-0.153844	0.0138794	-0.170963	-0.0702721	0.00712317	-0.0847463	-0.0895878	0.032329	0.0112685	-0.0531335	-0.0222686	-0.0440656	-0.0903719	-0.187321	-0.0913543	0.0577312	-0.165285	-0.0760847	-0.0782552	0.0100428	-0.0141864	-0.0514633	-0.0870726	-0.0834224	-0.0499128	-0.164444	-0.0593774	-0.0395178	-0.0917923	-0.128767	-0.0410227	-0.025331	0.0221192	-0.131549	-0.00582194	-0.00127621	-0.0378934	0.03011	0.0711512	-0.195719	0.0147441	-0.0747603	-0.073028	0.0325985	-0.00855487	-0.151597
L1CAM_interactions	0.133657	-0.152233	-0.0663036	-0.0933415	-0.152429	-0.117084	-0.0933803	-0.0218662	-0.0322373	-0.132163	-0.0409815	-0.0878855	-0.120232	-0.149983	-0.0555343	-0.0741799	-0.0923402	-0.134837	-0.0342298	-0.097351	-0.125721	-0.0739357	0.0399148	-0.148603	-0.113366	-0.0196113	-0.0439169	-0.0953788	-0.172174	-0.0786238	-0.0620238	-0.165492	-0.104864	-0.121013	-0.0965949	0.00921055	-0.160073	-0.0642831	-0.0941582	-0.139986	-0.137889	-0.19799	0.0556511	-0.0761996	-0.101535	-0.131551	0.0181126	-0.192892	-0.0372523
PDGFR-alpha_signaling_pathway	0.133657	0.0126269	-0.0606517	0.00438717	0.0645203	0.0751284	0.0103108	0.0174033	0.00541963	0.0140184	0.0292688	0.0310996	-0.0689099	0.0279479	0.0373696	0.0179408	0.0299899	0.0614519	0.0230795	0.0183414	0.075896	0.0192929	0.0588434	0.155845	0.00935717	0.0562785	-0.0124301	0.0861752	0.060658	0.0459537	0.0209818	0.0114478	0.0908583	0.0648395	0.117378	0.0244743	0.0267012	0.0812562	0.00153593	0.0271017	0.0104936	0.000402358	0.164875	0.0771913	0.0492062	0.0451336	0.0598863	0.102411	0.0314597
Recycling_pathway_of_L1	0.133657	-0.0456632	-0.0267717	0.00686446	-0.017184	0.00545204	0.00794594	0.031279	-0.0341289	0.0184296	0.00898812	-0.0422689	0.0469602	-0.0250912	-0.025414	0.00787743	-0.0131391	0.00234088	-0.0539417	0.0374336	-0.0493611	0.0189273	0.00396919	0.00527964	0.019649	0.0400889	-0.0579291	-0.0107054	-0.042302	0.110739	0.00217203	0.0417931	0.038227	-0.045447	-0.0459049	-0.00750254	-0.0474913	-0.0145141	-0.00121619	-0.0187494	-0.0461236	-0.0196584	0.0203341	-0.0540125	-0.0701628	-0.00915021	0.0216004	-0.0404195	0.00761634
role_of_ppar-gamma_coactivators_in_obesity_and_thermogenesis	0.133657	-0.037759	0.052817	0.154009	-0.0423431	0.1625	0.0534833	0.189722	0.0810844	0.0259725	0.147122	0.0695598	0.113802	0.0195745	0.1751	0.0256348	0.153536	0.0786132	0.201244	0.155213	0.154544	0.0394791	0.317163	0.169531	0.0160777	0.17199	0.0459369	0.187781	0.157129	0.0243823	0.214707	0.0881998	0.222361	0.304892	0.29918	0.0419568	0.0846607	0.170577	0.0430821	0.145587	0.0293567	0.016758	0.160283	0.0796087	0.17623	0.0553338	0.191706	0.0221454	0.0352914
Interaction_between_L1_and_Ankyrins	0.133657	-0.137308	0.0468292	-0.0854002	-0.080745	-0.0168975	-0.101889	-0.0831138	-0.0147371	-0.0253325	-0.0851487	0.0374321	-0.0515547	-0.0578375	-0.12173	-0.00985412	0.0388212	0.0429143	-0.153594	-0.0460756	0.0693449	-0.0206899	-0.072129	-0.0388266	-0.0385588	-0.063033	0.0232589	-0.0509439	0.0137907	-0.0244915	0.0296204	-0.0292999	-0.137416	0.0398443	0.0125643	-0.116757	-0.100495	0.0593775	0.149187	-0.0171501	-0.025629	-0.0748108	0.0376103	-0.0155051	-0.0639363	-0.137158	0.0192496	0.0281573	-0.151135
Import_of_palmitoyl-CoA_into_the_mitochondrial_matrix	0.133657	0.26241	0.340693	0.350246	0.222985	0.285978	0.23433	0.364053	0.337429	0.288238	0.39774	0.325909	0.373153	0.204253	0.269011	0.22294	0.161069	0.295964	0.333858	0.352473	0.27716	0.229404	0.329257	0.266723	0.102665	0.342749	0.372772	0.364052	0.201267	0.32824	0.40116	0.323768	0.190197	0.365536	0.253105	0.183175	0.314044	0.292802	0.301472	0.273401	0.327032	0.218016	0.116879	0.302573	0.251256	0.33955	0.280587	0.166302	0.265099
Conversion_of_palmitic_acid_to_very_long_chain_fatty_acyl-CoAs	0.133657	0.395515	0.278133	0.250974	0.270273	0.285703	0.284088	0.0341687	0.264738	0.141946	0.279396	0.281767	0.286063	0.45027	0.265582	0.2632	0.244291	0.146023	0.268447	0.286225	0.234647	0.289691	0.271309	0.249257	0.251869	0.265883	0.263528	0.25339	0.43845	0.438185	0.278217	0.429976	0.269936	0.466277	0.22873	0.153812	0.0331731	0.286742	0.451204	0.0228997	0.281532	-0.363537	0.219178	0.473548	0.274019	0.424394	0.251457	0.250449	0.283753
Signal_transduction_by_L1	0.133657	-0.0446775	-0.0035526	-0.00519307	-0.0137587	0.0104371	0.00740076	-0.0244996	-0.0224686	-0.0171115	0.0199845	-0.0553301	0.000452531	-0.0319033	-0.0137627	0.00805612	0.0217255	0.0350655	-0.0409893	0.0390629	-0.0332868	0.0128741	-0.0423635	0.0065958	-0.00825244	0.0280819	-0.0247015	0.0458516	-0.0148951	0.04405	0.0211262	0.0327537	0.0732969	-0.0577757	-0.0501995	-0.00641535	-0.0051973	-0.0339886	-0.0114995	-0.0212072	-0.0271805	-0.0157365	0.0794761	0.0213914	-0.0289616	0.0145588	0.0230522	-0.0265334	-0.0363674
Triacylglycerol_biosynthesis	0.133657	0.228677	0.217207	0.151988	0.207173	0.0458615	0.082105	0.0347657	0.00377238	0.192537	0.110877	0.10632	0.107094	0.298955	0.102809	0.223419	0.154963	0.11373	0.00273338	0.114661	0.105641	0.169671	0.0631527	0.0648288	0.300857	-0.0435649	0.16539	0.149048	0.275942	0.205537	0.0689472	0.166532	0.0455244	0.264569	0.121567	0.0637706	0.193013	0.244121	0.181244	0.210685	0.0681635	0.096172	-0.0124827	0.0569603	0.122129	0.10831	0.0163462	0.0599207	0.0125311
Hormone-sensitive_lipase_(HSL)-mediated_triacylglycerol_hydrolysis	0.133657	0.109255	0.0229281	0.102806	0.0198776	0.237855	0.122518	0.0432018	0.105791	0.0216881	0.0193744	0.0866359	0.0780805	0.0554959	0.102348	0.0670753	0.0416075	0.0915906	-0.0181951	0.0722454	0.0810942	0.0633566	-0.0288649	0.0561601	0.137835	0.127876	0.060221	0.0623995	0.0967174	0.225276	0.104665	0.0286252	0.0828577	0.187367	0.170353	0.164457	0.0645006	0.0984422	0.0015592	0.0899778	0.0436543	-0.00125964	-0.000890276	0.0981033	0.0634206	0.00102805	0.161936	0.00740386	0.142946
LDL-mediated_lipid_transport	0.133657	0.347111	0.451832	0.446671	0.454758	0.454174	0.455407	0.47038	0.465958	0.419147	0.444879	0.461565	0.446602	0.446157	0.444347	0.447632	0.453876	0.419368	0.449236	0.45404	0.434258	0.418853	0.452575	0.449383	0.311269	0.450997	0.458602	0.425052	0.450922	0.454231	0.468511	0.35451	0.446445	0.457156	0.406601	0.456938	0.441386	0.319667	0.368749	0.42265	0.457535	0.313419	0.419213	0.472894	0.45137	0.443583	0.389662	0.410918	0.437338
HDL-mediated_lipid_transport	0.133657	0.330449	0.362303	0.35354	0.330675	0.350492	0.320435	0.343884	0.367972	0.337061	0.33451	0.362188	0.315947	0.31925	0.322781	0.355095	0.356088	0.329999	0.334919	0.366246	0.297678	0.340649	0.347691	0.351309	0.290316	0.337195	0.345552	0.325659	0.308791	0.260604	0.346541	0.293106	0.34605	0.334358	0.325255	0.352079	0.324058	0.359127	0.336235	0.336369	0.331944	0.319612	0.350278	0.345674	0.321183	0.309017	0.282875	0.317976	0.35569
Chylomicron-mediated_lipid_transport	0.133657	0.281189	0.345035	0.370262	0.34815	0.351017	0.351909	0.350055	0.355693	0.332217	0.349737	0.366609	0.343874	0.339002	0.341376	0.338291	0.402184	0.330334	0.34786	0.348209	0.283624	0.346763	0.371256	0.348785	0.328435	0.387872	0.35652	0.268405	0.29302	0.297633	0.347066	0.358808	0.365601	0.38249	0.318513	0.300628	0.311458	0.309236	0.333833	0.335036	0.350824	0.293622	0.29946	0.354476	0.352657	0.359916	0.350331	0.304351	0.337464
Neurofascin_interactions	0.133657	-0.280562	-0.103409	-0.195145	-0.00557262	-0.207831	0.0615942	-0.209448	-0.146229	-0.302574	-0.230838	0.0554846	-0.148191	0.00692261	-0.145749	-0.135258	-0.210776	-0.240249	-0.12415	-0.166865	0.0311843	-0.127545	-0.0854545	-0.0316205	-0.0126646	-0.30113	-0.172007	-0.0736609	0.0830665	0.0120067	0.0181929	-0.0974751	-0.153568	-0.238709	0.13399	-0.14778	-0.217215	0.129388	-0.12878	-0.134337	-0.1636	-0.0972609	-0.0281852	-0.134502	-0.154658	-0.20904	-0.077083	-0.00423713	-0.144394
NrCAM_interactions	0.133657	-0.311166	-0.227426	-0.314396	-0.320801	-0.307719	-0.282349	-0.285536	-0.165532	-0.252887	-0.288774	-0.144314	-0.275268	-0.201484	-0.28477	-0.213443	-0.215668	-0.32099	-0.26815	-0.211373	-0.208193	-0.0157246	-0.140762	-0.213502	-0.0965499	-0.286693	0.108701	-0.318695	-0.0586731	-0.188758	-0.186377	-0.325891	-0.261085	-0.276568	-0.0989857	-0.294774	-0.306315	-0.00171358	-0.285465	-0.130045	-0.338267	-0.281293	-0.245449	0.154468	-0.273888	-0.289666	0.00522254	-0.262722	-0.330032
FGF_signaling_pathway	0.133657	0.0766276	0.0583522	0.062639	0.0742078	0.0966761	0.0500696	0.0848377	0.0379869	0.0783382	0.0542962	0.108589	0.0494616	0.0695327	0.0728329	0.0727855	0.0719703	0.103736	0.104339	0.094112	0.0455981	0.091094	0.11655	0.111198	0.0474171	0.0985507	0.0791898	0.116584	0.0913136	0.0797818	0.0784085	0.0567143	0.119539	0.123955	0.0600443	0.0621529	0.0942917	0.134501	0.0757783	0.107079	0.0621342	0.0353368	0.115804	0.0853939	0.0757982	0.0737948	0.0684031	0.117185	0.0593624
RhoA_signaling_pathway	0.133657	-0.0190049	-0.0326154	-0.0919818	-0.0355745	-0.014511	-0.0201319	-0.0141388	-0.0395894	-0.0613593	-0.0578865	-0.0325069	-0.0351459	-0.0617475	-0.0179123	0.00453837	-0.00395144	-0.0195669	-0.0702396	-0.0146929	0.0115401	-0.0533041	-0.0374853	0.0426502	-0.0282013	-0.00775005	-0.0417535	0.00827944	-0.0487246	-0.0403893	-0.00318812	-0.0481965	0.0261472	0.0131811	0.0804297	-0.0738311	-0.025929	-0.0413389	-0.0080561	-0.0286156	-0.0644198	-0.0319058	0.00917746	-0.042707	-0.00470072	-0.0103232	-0.0234422	-0.0260258	-0.0545237
IGF1_pathway	0.133657	0.0495986	0.00801232	0.0778319	0.05747	0.0815101	0.0146639	0.00493658	0.0408906	0.0510314	0.0564849	0.0764608	0.0266075	0.0312227	0.0735762	0.0182702	0.0294279	0.116815	0.0558148	0.100686	0.050899	0.0882987	0.0610281	0.0332816	0.0124477	0.0552886	0.0510988	0.09256	0.061437	0.0490376	0.0256108	0.0758827	0.0793986	0.0872229	0.0563884	0.0491701	0.0631944	0.0650516	0.0539968	0.0511624	0.0266632	0.0434113	0.0168276	0.137773	0.0618625	0.0404935	0.101451	0.0267513	0.0276619
FOXM1_transcription_factor_network	0.133657	-0.120058	-0.146923	-0.140201	-0.111512	-0.148454	-0.130341	-0.086284	-0.167422	0.125969	-0.108918	-0.162908	-0.166115	-0.0337792	-0.112764	-0.142685	-0.15934	0.161329	-0.0989389	-0.171146	-0.187759	-0.15267	-0.0720676	-0.131484	-0.0416134	-0.130672	-0.10679	-0.141064	-0.12156	-0.0852107	-0.129614	0.166223	-0.132064	-0.163754	-0.136871	-0.163679	-0.124368	-0.146906	-0.137169	-0.0978295	-0.125391	-0.167294	-0.0892997	-0.130239	-0.159223	-0.118338	-0.135391	-0.118985	-0.111423
Signaling_events_mediated_by_HDAC_Class_I	0.133657	-0.0609416	-0.019646	-0.0152563	-0.0236985	0.0131798	-0.00991351	0.00771108	-0.00985952	0.0198647	0.0199572	0.0195436	0.0174468	-0.008349	0.00015155	0.00525908	0.0188941	0.0404368	0.0337488	-0.0234128	0.00371506	0.00804051	0.0161044	0.0420452	0.0335033	0.0523389	0.0183146	0.0441891	-0.0135242	0.029466	0.0311764	0.0149515	0.031848	0.0355437	0.0569721	0.00637438	0.0680699	-0.0115473	0.0191624	0.0137981	-0.0182438	0.00668444	0.0113356	0.0411241	0.0355183	0.0158595	-0.0111957	0.0278772	-0.01311
Formation_of_the_HIV-1_Early_Elongation_Complex	0.133657	0.137263	0.201712	0.142592	0.126199	0.115431	0.213741	0.111116	0.120491	0.220887	0.153409	0.0691295	0.114675	0.138558	0.0616138	0.224002	0.0705649	0.23391	0.127629	0.0874435	0.0580703	0.165538	0.0683305	0.108057	0.137369	0.219908	0.127893	0.0990064	0.0546527	0.168996	0.148755	0.196562	0.0620578	0.0657163	-0.0131569	0.119163	0.128442	0.0806227	0.0554512	0.178916	0.122786	0.166789	-0.0440759	0.153042	0.0812449	0.144621	0.181284	-0.0727451	0.106803
RNA_Pol_II_CTD_phosphorylation_and_interaction_with_CE_1	0.133657	0.140467	0.177105	0.152642	0.127704	0.123456	0.223253	0.0882049	0.110776	0.228683	0.116412	0.0429445	0.103526	0.133615	0.050873	0.229835	0.0747991	0.249465	0.0955132	0.0881409	0.0580701	0.17508	0.105315	0.10137	0.131323	0.209407	0.116199	0.0908523	0.0475347	0.157574	0.134416	0.185425	0.0243015	0.0358372	-0.0223422	0.0784128	0.124152	0.0990682	0.0161521	0.14668	0.120751	0.141607	-0.0712066	0.153173	0.0567655	0.132666	0.187904	-0.0917595	0.0947459
RNA_Polymerase_II_HIV-1_Promoter_Escape	0.133657	0.0989286	0.11807	0.124236	0.131256	0.0998341	0.166614	0.0841676	0.0869027	0.1674	0.109306	0.049566	0.0955065	0.113464	0.0922438	0.193221	0.0434507	0.2261	0.0815638	0.0517475	0.0585629	0.14557	0.0720693	0.0862393	0.123851	0.170424	0.0963436	0.0888262	0.0856478	0.139751	0.117349	0.139372	0.0767288	0.0717262	-0.0531918	0.0828681	0.164566	0.113016	0.042895	0.131011	0.102881	0.113652	-0.102623	0.108446	0.0855636	0.108694	0.172712	-0.0743093	0.0965671
HIV-1_Transcription_Initiation	0.133657	0.0974143	0.117363	0.12418	0.132715	0.099422	0.168485	0.0843484	0.0852833	0.172939	0.110628	0.0460839	0.0980124	0.117142	0.093545	0.200324	0.0417937	0.23546	0.0803444	0.0477667	0.0606907	0.148136	0.0710259	0.0880842	0.126067	0.175532	0.0969887	0.0900947	0.0909348	0.144944	0.119283	0.142011	0.0731192	0.071828	-0.0554067	0.0810815	0.168054	0.114844	0.0402887	0.134205	0.106907	0.119108	-0.108587	0.109509	0.0842057	0.106916	0.176139	-0.0756987	0.0984835
Transcription_of_the_HIV_genome	0.133657	0.10175	0.112297	0.118464	0.135096	0.0941554	0.161718	0.0785989	0.0806323	0.163971	0.104136	0.0422713	0.0999258	0.118211	0.0872033	0.198794	0.0372741	0.229538	0.0753635	0.0445182	0.0657098	0.140914	0.0660963	0.0816493	0.122494	0.166743	0.0907948	0.0836758	0.0937758	0.136464	0.123993	0.143477	0.069088	0.0660932	-0.0588576	0.0763582	0.166012	0.117	0.0358871	0.135627	0.107968	0.118857	-0.110164	0.103355	0.079135	0.101971	0.168521	-0.0703909	0.09179
Late_Phase_of_HIV_Life_Cycle	0.133657	-0.241627	-0.228031	-0.234083	0.351381	0.353379	0.200168	0.209411	0.3977	0.155684	0.384589	0.34806	0.132169	0.130602	0.145815	0.379296	0.326643	0.215378	0.168867	0.176757	0.103258	0.224587	0.157791	0.132966	-0.255519	0.352448	0.387258	0.379463	0.291371	0.324552	0.388397	0.164832	0.408572	0.14286	0.0537877	0.176114	0.191559	0.155606	0.386751	0.211677	0.118652	0.102076	0.0464378	0.354057	0.174367	0.197033	0.237981	0.242432	0.138003
Autointegration_results_in_viral_DNA_circles	0.133657	0.257321	0.211459	0.217559	0.196557	0.197432	0.225672	0.176778	0.201252	0.184889	0.169001	0.174967	0.160048	0.218166	0.162175	0.162742	0.167298	0.230541	0.202114	0.180504	0.121261	0.203948	0.165748	0.159493	0.239768	0.170754	0.196294	0.166599	0.119765	0.177303	0.185387	0.229236	0.218875	0.170537	0.0764913	0.208724	0.198679	0.183801	0.191464	0.197722	0.149963	0.164173	0.0791048	0.196598	0.181335	0.243046	0.189437	0.0565868	0.175175
activation_of_pkc_through_g-protein_coupled_receptors	0.133657	0.148264	0.169023	0.19395	0.151468	0.18122	0.174737	0.16085	0.162731	0.158171	0.166474	0.128214	0.153183	0.14589	0.218831	0.164266	0.186356	0.151295	0.14359	0.178732	0.248318	0.177829	0.107593	0.19965	0.1159	0.177104	0.17086	0.129195	0.214965	0.148537	0.131531	0.15717	0.185883	0.119563	0.216799	0.153702	0.180801	0.1623	0.139755	0.157407	0.148972	0.215068	0.195028	0.184069	0.161761	0.161477	0.121991	0.143913	0.189302
Formation_of_HIV-1_elongation_complex_containing_HIV-1_Tat	0.133657	0.1239	0.175233	0.144583	0.122599	0.0641235	0.190732	0.107648	0.0880164	0.178684	0.14159	0.0683341	0.113744	0.130871	0.0785297	0.199777	0.0594787	0.194414	0.0941328	0.0623064	0.0402921	0.124875	0.0375499	0.096515	0.134033	0.154235	0.123374	0.100346	0.0744993	0.143861	0.133496	0.180937	0.0655841	0.0585654	-0.0321816	0.108513	0.0890225	0.039359	0.0351143	0.144929	0.0958141	0.131053	-0.0695475	0.124429	0.0578449	0.138227	0.154405	-0.0940207	0.0905309
Tat-mediated_elongation_of_the_HIV-1_transcript	0.133657	0.130918	0.174961	0.152399	0.148324	0.063537	0.194894	0.101008	0.0909857	0.194382	0.145329	0.083854	0.11688	0.150789	0.0999714	0.202533	0.0641986	0.216337	0.0940688	0.0651084	0.0436624	0.13654	0.043684	0.1121	0.141934	0.151522	0.144899	0.100544	0.0755343	0.148387	0.12914	0.181437	0.0657922	0.0564937	-0.0199883	0.109044	0.107979	0.0457373	0.0346501	0.158126	0.114579	0.146245	-0.0786489	0.118992	0.0758515	0.14669	0.154147	-0.0968486	0.0964419
Downregulation_of_TGF-beta_receptor_signaling	0.133657	0.00237595	-0.00914837	0.0346448	-0.00975055	0.0213245	0.0494795	0.123532	0.0121136	0.10234	0.0910086	0.0242879	0.0263157	0.00402177	0.0646294	0.00955789	0.0587975	0.109843	0.024344	0.0786322	0.0538642	0.0872583	0.0903086	0.0482618	-0.00795215	0.131531	0.00753554	0.0103245	0.0389159	0.0559231	0.0859272	0.00136877	0.00136805	0.0221543	0.0202161	0.0282325	0.131819	0.0857161	0.0315613	0.155399	0.112528	0.0110302	-0.0533041	0.0749493	0.0697358	0.0394738	0.143693	0.0350261	0.0928832
TGF-beta_receptor_signaling_activates_SMADs	0.133657	-0.05455	-0.0619497	-0.0437621	-0.0707395	-0.0702217	-0.0904739	0.0633718	-0.0218138	0.0730062	-0.0398032	-0.0400625	-0.0285128	-0.0427432	-0.0414133	-0.141995	0.0255294	0.0529227	0.0233237	0.0662754	-0.053603	0.1804	0.0482331	-0.0520072	-0.10908	0.0792292	-0.0583131	-0.102782	-0.0449634	-0.0243452	0.0628682	-0.0420922	-0.0360411	-0.0178869	-0.0609803	-0.0146041	0.0382316	-0.0252742	0.062297	0.0766863	0.126546	-0.0662133	0.0703743	0.0204697	0.0548984	0.056334	0.0447393	0.0581221	0.0492455
TGF-beta_receptor_signaling_in_EMT_(epithelial_to_mesenchymal_transition)	0.133657	0.0496675	0.0912214	0.013392	0.102793	-0.00138637	0.0832765	0.0693401	0.0708662	0.0681042	0.0815389	0.0704659	0.0932172	0.0611481	0.0257408	0.0946599	0.0738875	0.110618	0.0632871	0.0651548	0.0802123	0.20629	0.0336692	0.102262	0.0135545	0.103889	0.0504296	0.0743868	0.0669073	0.0346867	0.118586	-0.0262734	0.101228	0.126468	0.0245248	0.0497002	0.165311	0.0736224	0.0933595	0.128438	0.146285	0.0687714	0.0553902	0.0463475	0.163551	0.0969861	0.00131581	0.048277	0.0594244
Downregulation_of_SMAD2/3_SMAD4_transcriptional_activity	0.133657	0.0519307	0.0271345	-0.0024516	0.00292817	0.0336908	0.0304058	0.138963	0.0244807	0.121266	0.0293122	0.0469105	0.0216326	-0.0504604	0.0665988	-0.0357867	-0.050733	0.132756	0.0950564	-0.0172304	-0.0124005	0.0080084	0.094058	0.0014678	-0.0409602	0.149488	0.00354072	-0.0309827	-0.0332667	0.0614159	0.122734	0.0239219	0.0349283	-0.0122242	0.0100215	0.00788275	0.0946146	0.0652128	0.00600114	0.155438	-0.0247652	0.00377686	-0.0905664	0.0990761	0.121279	0.0199278	0.0720979	-0.0400303	0.061122
SMAD2/SMAD3_SMAD4_heterotrimer_regulates_transcription	0.133657	-0.0122589	-0.00260394	-0.0437789	-0.0757609	-0.0785489	0.000610369	0.0428939	-0.0340737	0.0492944	-0.0161055	-0.0413587	0.00289497	-0.018851	-0.126389	0.000762584	-0.0756271	0.050713	-0.0135662	-0.0674128	-0.00940897	-0.0302768	0.0631754	-0.0447284	0.0152784	0.0287349	-0.046605	-0.00302285	-0.0441618	0.0368611	0.0152244	0.022738	0.00994501	-0.0577045	0.0108554	-0.00879939	0.019035	-0.00883895	-0.00983455	0.0853203	0.0037031	-0.0318322	-0.0823742	0.0495657	0.00482489	-0.0339606	0.0207252	-0.109267	-0.0145489
Pre-NOTCH_Processing_in_the_Endoplasmic_Reticulum	0.133657	-0.0700075	-0.173945	0.165415	-0.140106	0.168454	0.187457	0.204546	0.195449	-0.13973	0.191853	0.220392	0.18965	0.19989	0.174294	0.180878	0.178393	-0.0600137	0.103879	0.245403	0.175676	0.194791	-0.0593633	0.144122	0.162377	0.195047	-0.0606285	0.185342	0.254487	-0.155361	0.248828	-0.199602	0.202861	0.255264	0.105814	-0.0520449	-0.0129821	0.294477	0.164073	0.160754	0.195254	-0.21696	0.0619051	0.217382	0.193487	-0.153325	-0.160486	0.192561	0.17454
Pre-NOTCH_Transcription_and_Translation	0.133657	0.1886	0.0860637	0.0655472	0.138685	0.17348	0.0404929	0.168956	0.104851	0.043721	0.149669	0.165549	0.140759	0.115002	0.141801	0.0199662	0.0890259	0.0188845	0.176984	0.119934	0.148256	0.0108136	0.148806	0.0632428	0.0216581	0.188093	0.0788202	0.198013	0.111894	0.0591087	0.132894	0.0316103	0.202084	0.218706	0.0670335	0.0311802	0.0543659	0.131836	0.0856114	0.0547088	-0.0232573	0.00602214	0.0240252	0.163185	0.162429	0.0314465	0.00754749	0.121195	0.127846
Vif-mediated_degradation_of_APOBEC3G	0.133657	0.265721	0.292065	0.221627	0.239232	0.207461	0.296844	0.16381	0.238824	0.123497	0.175446	0.155001	0.273447	0.287978	0.213051	0.263039	0.181379	0.123127	0.19099	0.146913	0.14147	0.204907	0.126794	0.190064	0.289883	0.269178	0.271972	0.191271	0.199872	0.22735	0.133898	0.199253	0.134604	0.138759	0.120765	0.180163	0.203806	0.0937323	0.203596	0.121689	0.166832	0.255731	0.136836	0.164258	0.152884	0.228817	0.257944	0.064371	0.249593
APOBEC3G_mediated_resistance_to_HIV-1_infection	0.133657	0.250652	0.236354	0.167514	0.166629	0.150419	0.1818	0.13727	0.170715	0.190789	0.126036	0.211607	0.17049	0.216049	0.130776	0.14671	0.197772	0.159285	0.223722	0.140441	0.16436	0.164072	0.13304	0.207475	0.23778	0.194796	0.19046	0.190195	0.154945	0.190519	0.139127	0.162435	0.177804	0.20901	0.118294	0.154984	0.166835	0.15209	0.214123	0.140758	0.100769	0.183497	0.131802	0.152992	0.142568	0.187884	0.153503	0.0988338	0.201101
E2F_transcription_factor_network	0.133657	-0.0644904	-0.109642	-0.0896557	-0.1067	-0.0799324	-0.0597983	-0.0516504	-0.0700742	-0.00953194	-0.0515963	-0.0685388	-0.0886264	0.127284	-0.070486	-0.0889073	-0.0389061	-0.0205874	-0.0427386	-0.0746972	-0.0683711	-0.110201	-0.00474822	-0.0329247	0.0462154	-0.0685126	0.0799601	0.0558186	-0.053751	-0.0237121	-0.0691919	0.0780107	-0.0224101	-0.0333347	-0.0449991	-0.0604041	-0.0465598	-0.0361484	0.0533846	-0.0334552	-0.0813795	-0.107505	-0.0810178	-0.0278094	-0.0770088	-0.0951952	-0.0332135	-0.117876	-0.0682282
Membrane_binding_and_targetting_of_GAG_proteins	0.133657	0.187099	0.243738	0.142569	0.206587	0.19008	0.270933	0.10736	0.176918	0.309315	0.132458	0.0849998	0.141923	0.161079	0.189795	0.294444	0.106641	0.231714	0.172333	0.103622	0.0483353	0.236105	0.141377	0.214345	0.21332	0.268359	0.170181	0.103751	0.10691	0.195297	0.135006	0.121568	0.057475	0.10236	0.106322	0.197158	0.306619	0.0707134	0.135825	0.182052	0.207172	0.171555	0.0917075	0.251902	0.198761	0.221095	0.0665077	-0.00827431	0.210584
Vpr-mediated_nuclear_import_of_PICs	0.133657	0.0940741	0.0245778	0.028823	0.0462612	0.0510872	0.0633612	0.0920091	0.0648829	0.162826	0.0687619	0.0990009	0.0751869	0.0819784	0.0654114	0.0643118	0.050359	0.154465	0.0736637	0.0737159	0.0137642	0.0846383	0.10055	0.07728	0.0924558	0.124567	0.0558128	0.127316	0.0285297	0.0458339	0.135102	0.124722	0.10599	0.0831065	-0.0146651	0.103295	0.168843	0.131013	0.0855402	0.130034	0.0269924	0.0599615	-0.0313417	0.124829	0.0958276	0.0944196	0.115853	-0.0425526	0.0504683
Vpr-mediated_induction_of_apoptosis_by_mitochondrial_outer_membrane_permeabilization	0.133657	0.209522	0.212522	0.0158776	0.187166	0.177168	0.248607	0.29321	0.21474	0.144603	0.2004	0.229507	0.254638	0.25436	0.287226	0.157666	0.257708	0.183775	0.299569	0.279418	0.128274	0.327141	0.297742	0.251637	0.291614	0.191092	0.140737	0.258887	0.121036	0.16201	0.139595	0.151012	0.201425	0.269465	0.115313	0.303833	0.330499	0.15019	0.127675	0.183592	0.17045	0.0840544	0.104814	0.144619	0.306085	0.223527	0.307202	0.0938286	0.1806
Nuclear_import_of_Rev_protein	0.133657	-0.0742735	-0.156049	-0.153722	-0.117626	-0.118347	-0.103649	-0.0493289	-0.116497	0.0592889	-0.0120263	-0.0345313	-0.0493103	-0.0522948	-0.0883825	-0.0294957	-0.114411	0.0379513	-0.102779	-0.0787487	-0.112864	-0.0796953	-0.0327767	-0.0643628	-0.0511791	0.00193643	-0.0412192	0.0218345	-0.116159	-0.110664	0.0421135	0.0677758	-0.0628961	-0.0493577	-0.158446	-0.0557999	0.0720187	0.0116926	-0.0513049	0.00299433	-0.139992	-0.0874139	-0.190137	-0.00465174	-0.0453895	-0.0639531	-0.0153753	-0.184804	-0.119386
antisense_pathway	0.133657	0.272654	0.00814004	0.0413111	0.266062	0.00897107	0.283976	0.322728	0.0108205	0.252401	0.254714	0.2615	0.22891	-0.0195884	0.241542	0.243611	-0.0137174	0.252093	0.332993	0.00814344	0.20416	0.0297428	0.328189	-0.0165154	-0.00395044	0.340159	-0.00483934	0.232406	0.183573	-0.0192781	0.255935	-0.00294953	0.355609	0.00647541	-0.0691362	0.26736	0.282434	0.331287	0.0144792	0.328863	-0.00850661	0.292242	0.201472	0.337551	0.266409	0.0468728	0.274505	0.232217	0.00432041
tnfr2_signaling_pathway	0.133657	0.0219336	0.0798436	0.00513438	0.0175369	0.108492	-0.0968121	0.121302	0.147134	0.013111	0.02509	0.0735028	0.08446	0.20409	0.0551992	0.0497965	0.0720297	0.0751143	-0.000259107	0.0149127	0.116255	0.0238959	0.0982916	0.0417218	0.11283	0.138449	0.0865658	0.106804	0.0559519	0.173016	0.0701734	0.0929015	0.0728347	0.156587	0.108561	0.288887	0.0176192	0.0401002	0.112937	0.0471673	0.0498948	0.132999	0.113651	0.0555699	0.137409	-0.0815031	0.0315897	0.00160398	0.136439
The_IPAF_inflammasome	0.133657	0.0644885	0.130017	0.0639114	0.102618	0.144888	0.0798946	0.0481222	0.145357	0.045046	0.0501179	0.0586583	0.247981	0.0301728	0.0429757	0.223836	0.290487	0.0442768	0.057422	0.0624226	0.167704	0.0561514	0.0527598	0.184766	0.30725	0.133834	0.129201	0.18703	0.300842	0.0262724	0.051702	0.0909535	0.0697823	0.045468	0.235625	0.0614835	0.0728119	0.0378217	0.0336821	0.0409378	0.0944068	0.163894	0.27414	0.0598106	0.0540771	0.0730044	0.152437	0.220091	0.189439
The_NLRP1_inflammasome	0.133657	-0.309871	-0.100926	-0.140062	-0.146499	-0.322127	-0.107225	0.310812	-0.119461	-0.140355	-0.246323	-0.133412	0.316669	-0.176098	-0.0458938	-0.374026	-0.147093	-0.319844	-0.032905	-0.317914	0.161181	-0.126653	-0.0397861	-0.228442	-0.362136	-0.150166	-0.16123	0.0457014	0.197464	-0.174175	-0.248348	-0.336687	-0.345988	-0.379476	0.151218	-0.211036	0.088314	-0.0644045	-0.356148	-0.156998	0.0534625	-0.175912	-0.200785	-0.0347409	-0.12611	-0.109257	-0.0280806	-0.0339505	-0.151454
Advanced_glycosylation_endproduct_receptor_signaling	0.133657	-0.129738	0.0203018	0.100284	-0.0144563	-0.0850579	-0.0165792	-0.0642332	-0.0549451	-0.143279	-0.115817	-0.182161	-0.13827	0.0617643	-0.064679	-0.0872966	-0.093371	-0.13327	-0.100206	-0.0252802	-0.0435613	-0.0836322	-0.0886678	0.0512669	-0.148109	-0.0280266	-0.148886	0.0627265	-0.0236448	0.0399197	-0.137884	-0.0765622	-0.017817	-0.152501	-0.00644944	-0.0766848	-0.19264	-0.0634513	-0.112366	-0.184658	-0.0781253	0.0707158	-0.0843089	-0.083863	0.0174712	0.0253211	-0.103512	-0.0310662	-0.101475
The_AIM2_inflammasome	0.133657	0.200412	0.419804	-0.277278	-0.107152	-0.286473	-0.27427	-0.302583	-0.278356	-0.28819	-0.296877	-0.255309	-0.0219786	-0.269239	-0.307081	0.276135	-0.113207	-0.314122	-0.253786	-0.284266	-0.308155	-0.296746	-0.299723	-0.270751	0.415011	-0.273418	-0.018389	-0.276973	-0.0212322	0.190088	-0.298685	0.349825	-0.264252	-0.261502	-0.170964	-0.288662	-0.298701	-0.298425	0.193576	-0.30571	-0.315973	0.163727	0.309032	-0.299431	-0.283282	-0.287659	-0.284008	0.193095	-0.259696
NOD1/2_Signaling_Pathway	0.133657	-0.00683971	0.0304089	-0.0319249	0.0735781	0.0533564	0.00468771	0.0465698	0.0304371	0.0175048	-0.0110384	-0.0286617	0.0158464	-0.044721	-0.00179523	0.0467393	0.0139831	0.0262988	0.0176444	0.0192504	-0.00656163	-0.0234445	-0.002779	0.00804565	0.0297489	0.0545009	0.0802704	0.0720079	0.00237798	0.0483767	0.0367992	0.110169	0.0791219	0.0654288	0.0329945	-0.0122501	0.0224612	0.0263541	-0.0286593	0.10259	-0.00806613	-0.0012656	0.0304515	0.0327123	0.0252819	0.00251661	0.0597758	0.0340114	0.00932708
The_NLRP3_inflammasome	0.133657	0.00697912	0.0971485	-0.0033916	-0.00325203	-0.120355	-0.113669	-0.0815669	-0.14653	-0.128317	0.00225125	-0.0216727	0.0247435	-0.0578661	-0.00103565	0.00379015	-0.159384	-0.0851466	-0.165612	-0.14111	-0.0591834	-0.0573876	-0.172145	-0.00499519	0.0446873	0.06326	-0.0354246	-0.0397095	0.0201245	0.0238559	-0.156733	-0.0119906	-0.00600091	-0.145506	0.0738882	-0.114686	0.00601066	-0.144467	-0.0920479	-0.0834072	0.0884135	0.182827	0.175839	0.0696016	-0.00851367	-0.0795496	-0.0653586	0.227998	0.00618687
Inflammasomes	0.133657	-0.0976225	0.229111	0.079622	-0.0561137	-0.0593388	0.0578363	0.0691869	-0.158912	0.165485	0.214713	-0.066248	0.0843816	-0.184411	0.00821062	0.0930274	-0.0875844	0.26212	-0.0995263	-0.155197	-0.0296261	0.312028	-0.112983	-0.0931488	0.25439	-0.0668084	0.250739	0.145817	-0.0783775	-0.0920352	0.16118	0.172451	-0.0470441	-0.0887751	0.180769	0.28661	0.047287	-0.0767832	0.0929626	0.208377	-0.00265019	0.128353	0.172402	-0.0919296	0.0537876	0.134331	-0.149024	0.137012	0.147485
TRAF3-dependent_IRF_activation_pathway	0.133657	0.0491176	0.00465301	-0.0342448	0.126896	-0.107077	0.0518385	0.0704516	0.0167003	-0.00494221	-0.12726	0.0106982	0.178318	-0.0167292	-0.0329442	0.0955399	-0.0299464	0.0148792	0.20131	-0.156867	-0.058475	-0.0290581	-0.0606999	-0.0582288	0.050171	0.122708	-0.041043	0.0605308	0.0668195	-0.0236565	-0.037908	0.124051	-0.190972	0.0472255	-0.136733	-0.0186721	-0.142159	0.0511642	-0.0254608	0.158039	-0.14351	0.11057	0.0291322	0.175271	-0.0270298	0.0267258	-0.0283152	0.0448671	-0.0306882
RIG-I/MDA5_mediated_induction_of_IFN-alpha/beta_pathways	0.133657	0.0688376	0.152143	-0.0665718	0.229027	0.0189814	0.188705	0.255949	0.0271346	-0.0599825	-0.137668	0.198484	0.357927	0.0355209	-0.0897644	0.0559043	0.127806	-0.0694746	0.318055	-0.202359	0.0553512	-0.12936	-0.133018	-0.0132868	0.155085	0.257562	0.0907632	0.0162146	0.093063	0.0330811	0.0741805	0.197304	-0.132563	0.120749	-0.0507411	-0.0853183	-0.035242	0.0959785	0.0881273	0.148574	-0.0784709	0.0332571	0.198178	0.1821	0.164456	-0.0503254	0.159019	0.318105	0.130044
Cyclin_E_associated_events_during_G1/S_transition	0.133657	-0.0627978	-0.126239	-0.134365	-0.101733	-0.0748088	-0.0853647	-0.0567678	-0.149056	-0.084381	-0.118619	-0.164755	-0.169128	0.0232391	-0.0760943	-0.148298	-0.131006	0.00259237	-0.108405	-0.117867	-0.141233	-0.0722359	0.0275292	-0.0674106	0.246095	-0.124241	-0.136493	-0.0158016	0.0863356	-0.0440117	-0.0162929	0.01039	-0.116396	-0.0743582	-0.123129	-0.179448	0.0261518	0.0544165	-0.02802	-0.0445379	-0.0823835	-0.0464158	-0.139612	-0.175121	-0.100599	-0.232252	-0.0576136	-0.226953	-0.144856
G0_and_Early_G1	0.133657	-0.0365316	-0.144847	-0.177955	-0.170868	-0.145094	-0.101137	-0.0887517	-0.177756	-0.0386271	-0.16294	-0.145233	-0.0943404	0.0936131	-0.0723555	-0.0937725	-0.181843	-0.042008	-0.0908747	-0.12602	-0.175052	-0.161898	-0.0783533	-0.185028	0.0863685	-0.1395	0.0634265	-0.054238	-0.0753125	-0.0885089	-0.116949	0.0134049	-0.0591682	-0.102489	-0.175335	-0.0856564	-0.0659061	-0.037169	0.0301216	-0.0725626	-0.173704	-0.193605	-0.20622	-0.112916	-0.110204	-0.105497	-0.105249	-0.210994	-0.143235
Cyclin_D_associated_events_in_G1	0.133657	0.0541251	-0.0102208	-0.0523027	-0.0367143	0.0107006	-0.000582094	-0.0230407	-0.0686458	0.0532808	0.000119453	-0.0672223	-0.0554177	0.0820588	-0.0329804	0.0162248	-0.059239	0.039304	-0.0359554	-0.0775205	-0.0854561	-0.010925	-0.0190321	-0.0158552	0.0847796	0.0390256	0.00998614	0.0027853	-0.0703989	0.00433003	-0.115573	0.119957	-0.0185182	-0.0701347	-0.041224	-0.00541253	0.0433798	-0.0336074	-0.00365447	0.0782011	-0.0773599	-0.0110086	-0.0994283	-0.0767836	-0.0760672	0.00225555	0.00742722	-0.149868	-0.0112094
Inhibition_of_the_proteolytic_activity_of_APC/C_required_for_the_onset_of_anaphase_by_mitotic_spindle_checkpoint_components	0.133657	0.130418	-0.159541	-0.170914	-0.178191	-0.177704	-0.159384	-0.187735	-0.177273	-0.214079	-0.193472	-0.189809	-0.21088	0.485655	-0.205629	-0.201698	-0.2003	-0.020557	-0.183031	-0.175647	-0.244843	-0.198635	-0.195499	-0.212151	-0.190057	-0.188782	0.235342	-0.220904	-0.24192	-0.214717	-0.195301	0.118287	-0.164405	-0.201101	-0.249116	-0.181283	-0.164214	-0.215052	-0.20805	-0.215568	-0.224093	-0.246613	-0.256435	-0.194105	-0.180711	0.0219529	-0.174066	-0.26978	-0.202906
Amplification__of_signal_from_unattached__kinetochores_via_a_MAD2__inhibitory_signal	0.133657	-0.190782	0.156824	0.0936206	0.129461	0.150163	0.163356	-0.215231	-0.197681	0.0668854	-0.210619	0.141084	0.0466491	0.448492	-0.221935	0.0595501	0.0531198	-0.211358	-0.203097	0.128802	0.0211825	-0.195381	-0.214244	0.0453744	0.118574	0.0742366	0.47188	0.128586	0.0720367	0.100734	-0.213395	0.0756466	0.160387	0.124881	-0.266475	0.127244	-0.160799	-0.215492	0.119072	0.0648569	0.0352391	0.0803206	-0.0266437	-0.211778	0.082826	0.16209	-0.191948	-0.0431045	0.102968
Inactivation_of_APC/C_via_direct_inhibition_of_the_APC/C_complex	0.133657	0.0471146	-0.00824683	-0.0434719	0.0512836	0.00160149	-0.0309632	-0.0235974	0.0503721	0.15675	-0.00298136	-0.155148	-0.0109556	0.142585	0.0764781	0.0260973	-0.110585	0.218401	0.00409058	-0.0146511	-0.0398815	0.087013	-0.032307	-0.0390256	0.076419	-0.019338	0.154456	0.0217786	-0.0361878	-0.00560819	0.0637126	0.131039	-0.0312241	-0.0750682	-0.10012	0.0375873	0.0635435	0.0712947	0.0786681	0.124371	-0.0115677	0.0901757	-0.134982	0.0539176	-0.114528	0.000913556	0.097474	-0.141401	-0.0294468
basic_mechanism_of_action_of_ppara_pparb(d)_and_pparg_and_effects_on_gene_expression	0.133657	-0.0253538	0.248035	0.254646	-0.00781042	0.370517	0.191762	0.359405	0.257385	0.167399	0.329907	0.0020927	0.30472	0.159915	0.375926	0.264341	0.377398	0.459408	0.337724	0.25937	0.343185	0.246891	0.348106	0.374533	0.144235	0.247771	0.348608	0.35805	0.220481	0.364959	0.26539	0.241757	0.392029	0.367393	0.469993	0.249126	0.463723	0.170227	0.152536	0.170069	0.336923	0.209653	0.346058	0.253364	0.36152	0.193801	0.35021	0.19077	0.173552
HIF-2-alpha_transcription_factor_network	0.133657	0.0102562	-0.0354656	0.0887916	0.124238	0.0595214	0.128718	0.177281	-0.0151741	0.0752941	0.114019	0.109221	0.105467	0.174832	0.220718	0.141562	0.160127	0.0529574	0.0594178	0.0680777	0.15447	0.0786058	0.0561749	0.139739	-0.0100587	0.0949815	0.0320653	0.14666	0.192648	0.143782	0.119031	0.0823153	0.169682	0.130665	0.179512	0.129476	0.0816582	0.034171	0.105609	0.0515381	0.180043	0.0974983	0.115437	0.0838365	0.144125	0.0849056	0.0712708	0.168456	0.0919201
P2Y_receptors	0.133657	-0.299482	-0.0232834	-0.0488024	0.0256885	-0.0859221	-0.109548	-0.0193017	-0.0431305	-0.183254	-0.0175086	0.00527337	0.0268248	-0.195939	0.0114456	-0.105626	-0.101808	-0.19247	-0.0982476	-0.131277	0.0949329	-0.173074	0.0494983	-0.0395218	-0.100043	-0.0606473	-0.0748079	-0.137507	0.118776	-0.182593	0.0213281	-0.166927	-0.0757135	0.0424518	-0.00508073	-0.00655208	-0.081231	-0.0142132	-0.0245056	-0.206846	0.0210051	0.0443592	0.130457	-0.222022	-0.0205948	-0.18075	0.0764016	0.184988	0.141823
Nongenotropic_Androgen_signaling	0.133657	0.0256215	0.0790865	0.0779645	0.0307087	0.0811204	0.0853726	0.112548	0.106764	0.0292719	0.0572267	0.0467774	0.0891789	0.123666	0.0929356	0.0285647	0.0590123	0.104996	0.0455814	0.0658016	0.0652084	0.0619644	0.109285	0.0655973	0.0839309	0.118047	0.0769862	0.095481	0.0306297	0.0784609	0.0873321	0.112548	0.144928	0.0800844	0.106617	0.108387	0.0990508	0.0733345	0.0473646	0.0512063	0.0832849	0.0762793	0.0648166	0.0591518	0.0276599	0.0680489	0.146923	0.0612259	0.127227
Elongation_arrest_and_recovery	0.133657	0.146069	0.208443	0.181465	0.129113	0.0450402	0.228606	0.136105	0.100902	0.184953	0.172589	0.0479616	0.154797	0.155723	0.125339	0.219235	0.073721	0.200333	0.108937	0.0612109	0.0639037	0.140865	0.0459713	0.0994962	0.161955	0.105835	0.174656	0.111592	0.0505737	0.187787	0.154316	0.18661	0.0864778	0.0269599	-0.0180331	0.129657	0.0997992	0.0517554	0.0875994	0.15652	0.102312	0.147849	-0.0616735	0.115844	0.052349	0.174164	0.160894	-0.089176	0.120492
Transcriptional_Regulation_of_White_Adipocyte_Differentiation	0.133657	0.0268407	0.0355674	-0.00184242	0.027901	0.101338	0.0582201	0.116166	0.0866595	0.0790892	0.0849178	0.0616013	0.0964211	0.0644444	0.107316	0.0758949	0.0962972	0.111602	0.128323	0.0638609	0.0596146	0.0741591	0.12226	0.09363	0.0666959	0.0957967	0.0464824	0.0902317	0.0214274	0.0846419	0.139811	0.0695402	0.0984058	0.107588	0.126725	0.0995355	0.0655761	0.104128	0.0360174	0.0657617	0.110898	0.102108	0.0936094	0.123617	0.0598509	0.0755136	0.0777371	0.0492355	0.059949
Dopamine_receptors	0.133657	0.0348079	-0.0203211	0.196018	0.28071	0.189464	-0.018231	0.174341	0.112717	0.0956614	0.27813	0.188067	0.128481	0.0304871	0.270152	0.136074	0.12692	0.186415	0.148408	-0.0232023	0.169527	0.0639804	0.275758	0.160153	0.188181	0.1508	0.100594	0.263159	0.0890828	0.203965	0.100093	0.00565259	0.123931	0.0900527	0.0290551	0.110718	0.286956	0.141069	0.1688	0.241388	-0.0676412	-0.175705	0.0992223	0.147207	0.189486	-0.121166	0.159367	0.0902607	0.16367
Adrenoceptors	0.133657	0.173479	0.101156	0.295739	0.122001	0.21185	0.122332	0.294283	0.267073	0.0822829	0.349229	0.208167	0.0939165	0.094422	0.306784	0.178643	0.239987	0.233921	0.228979	0.104285	0.170322	0.301099	0.296968	0.188513	0.0960851	0.26407	0.208817	0.0867346	0.0713048	0.196159	0.179931	0.174318	0.225562	0.214867	0.326698	0.28608	0.101663	0.204818	0.237476	0.214817	0.260314	0.155272	0.285911	0.172383	0.217386	0.177001	0.352803	0.227001	0.150199
Serotonin_receptors	0.133657	0.0368496	0.000800715	0.119953	-0.0525756	-0.0414627	0.0763962	0.0699736	0.0875076	0.0299952	0.151908	0.0586838	-0.000750036	0.0707653	0.0985547	0.0899883	0.0638768	0.098488	0.0425643	-0.0671182	0.0598187	-0.137103	0.128067	0.0675942	-0.0132949	0.0774338	0.00300275	-0.014085	0.099958	-0.128829	0.10288	-0.0298457	-0.00452496	-0.0207807	0.0540939	0.152253	0.0324825	0.0244917	0.047142	-0.147563	0.0185206	0.0555401	0.0919457	0.156064	-0.00542106	-0.00288472	0.179697	-0.0133173	0.129518
Histamine_receptors	0.133657	-0.308341	-0.313184	-0.0409702	0.084537	-0.0452411	-0.0373212	-0.0600475	-0.10533	-0.0869313	-0.0476258	-0.0449466	-0.0606851	-0.0997691	-0.0635901	-0.059799	-0.0614661	-0.146429	-0.0800065	-0.0429314	-0.176907	-0.337847	5.21e-05	0.0876461	-0.0768897	-0.0463607	0.21807	-0.375334	0.0918351	-0.0617141	0.102959	-0.309036	-0.0564141	-0.351593	0.182823	0.11261	-0.0843654	-0.141911	0.0288607	0.132969	-0.0748193	-0.368391	-0.151312	-0.342344	-0.045877	-0.337153	-0.331934	-0.0419572	-0.35625
Eicosanoid_ligand-binding_receptors	0.133657	0.460374	0.452643	0.455393	0.461367	0.455515	0.455929	0.447715	0.455644	0.454439	0.447509	0.44668	0.443016	0.443268	0.440269	0.46297	0.442954	0.44838	0.452589	0.453456	0.437602	0.456416	0.451132	0.435125	0.454718	0.472488	0.454101	0.463581	0.433689	0.451562	0.451027	0.45279	0.422085	0.458477	0.402806	0.455258	0.457335	0.455157	0.452253	0.45334	0.435984	0.376535	0.393364	0.45608	0.457135	0.459295	0.467384	0.395579	0.441369
Hormone_ligand-binding_receptors	0.133657	0.193547	0.0778565	0.206639	0.102449	0.0300761	0.0206661	-0.00951323	0.132136	0.0925134	0.0616048	0.0966034	0.115188	0.0845329	0.0492526	0.0981741	0.0863794	0.114859	0.0645773	0.10037	0.0185562	0.079974	0.127285	0.0544768	0.0517882	0.0926982	0.152793	0.0283232	-0.00437733	0.058015	0.0451	-0.00342139	0.149508	0.128305	-0.0455287	0.133815	0.113012	0.214322	0.119828	0.106184	0.00568201	0.166563	0.117427	0.0629444	0.104182	0.0883561	0.0163497	0.0772846	0.154933
Leukotriene_receptors	0.133657	0.0485845	0.00901638	-0.0988151	0.229338	0.294113	-0.281589	-0.0866834	0.0276796	-0.170011	0.117454	0.230228	0.185589	0.0904754	0.246171	-0.17311	0.0381198	0.0705807	0.101611	-0.0769082	0.209001	-0.160724	-0.0349866	0.104374	-0.0143244	-0.113465	0.227051	-0.195566	0.238282	-0.0251332	0.113993	-0.312749	-0.166442	0.183059	-0.13204	0.232631	-0.0823358	0.0653548	0.220484	-0.298276	0.132343	-0.325371	0.114924	-0.297961	0.238472	-0.283159	-0.155489	0.254908	-0.0478226
Prostanoid_ligand_receptors	0.133657	0.155071	-0.015459	0.100009	-0.0491456	0.0936565	-0.0472721	-0.0377988	0.0734319	-0.134158	-0.0606484	0.0575694	0.186615	0.29425	0.152847	0.108298	0.0236254	-0.139493	-0.155769	0.00750773	0.108873	0.111899	-0.243038	0.159834	0.0825778	-0.0555042	-0.148755	-0.143182	0.144967	0.0825561	-0.172942	-0.09881	-0.0587638	0.101148	0.227754	-0.0182579	-0.157525	0.0868878	0.178223	-0.258772	0.241306	0.325723	0.219461	-0.245212	-0.0573919	0.0522661	-0.236309	0.253725	-0.0369388
regulation_of_bad_phosphorylation	0.133657	-0.11123	-0.0685082	-0.0126672	0.0130233	-0.00138478	-0.0462977	-0.0308898	0.028628	-0.0465054	-0.0426893	-0.00314295	-0.0819743	-0.0190499	0.0233437	-0.0699661	0.0135986	-0.034151	-0.0318177	-0.0390703	0.0874949	-0.00651851	-0.031079	-0.0235525	-0.0782177	-0.00335202	-0.0167365	0.0212338	0.00533301	0.0288039	0.0415251	-0.0954284	0.0603846	-0.00675495	0.119963	-0.0123848	-0.0830752	-0.00122733	-0.0699033	-0.0235396	-0.032677	-0.0679639	-0.0272949	0.0535802	0.0207543	-0.0382132	-0.00730301	0.0188364	-0.0159205
links_between_pyk2_and_map_kinases	0.133657	0.0706242	0.0744458	0.0486644	0.113931	0.148624	0.0715131	0.0990936	0.107379	0.0735185	0.0698557	0.136079	0.0499793	0.0801533	0.0908786	0.0490349	0.145658	0.0927545	0.123103	0.128217	0.12956	0.110408	0.103373	0.119028	0.154927	0.1349	0.121361	0.112898	0.0780022	0.154506	0.0943955	0.0715049	0.147066	0.0893482	0.124027	0.135075	0.0927497	0.0958018	0.1288	0.0694889	0.0284008	0.075697	0.0712233	0.144765	0.0964675	0.121583	0.0896742	0.0677287	0.098965
segmentation_clock	0.133657	-0.0444373	-0.0640913	0.0253566	-0.0508732	0.0132594	0.0456386	0.0344016	0.0165448	-0.0197058	0.0453614	0.0586571	-0.000305936	0.0445515	0.00777766	-0.0192256	0.00588886	-0.108998	0.0207761	0.00471536	0.0821776	0.01267	-0.0724817	-0.00690181	0.0257938	-0.00240147	-0.0470823	0.00731842	0.00624706	-0.0253449	0.0724845	-0.082792	-0.00613459	-0.039753	0.0163555	-0.100414	-0.00420371	0.0448964	0.0282691	0.000255816	0.0224093	-0.00609221	-0.0305887	0.0623551	-0.00627496	-0.0207345	-0.123714	0.0197873	0.0150172
gamma-aminobutyric_acid_receptor_life_cycle_pathway	0.133657	-0.0242239	-0.0539946	-0.0309495	-0.0179153	-0.00129004	-0.0491628	-0.0588065	-0.0112754	0.0260242	-0.00832591	-0.0471097	0.0239966	0.1639	0.0120148	0.0324993	0.0146526	-0.0677307	-0.028114	0.0752573	-0.00667824	0.0605239	0.0229559	-0.0982106	0.0278526	-0.0840235	0.0278931	0.0146333	-0.00233987	0.0119764	-0.0528177	-0.0192546	0.0155644	0.139139	-0.0773944	-0.0212682	0.0589035	0.0380543	-0.0465804	0.00364596	0.0129947	-0.0265849	0.000740005	-0.0130226	0.0970306	-0.0312997	0.0357787	0.0170411	-0.0402995
Thromboxane_A2_receptor_signaling	0.133657	0.025192	0.0445584	0.0627279	0.0217651	0.079554	0.0688905	0.0738953	0.0501129	-0.0273286	-0.0062069	0.0407144	0.0718199	0.0448292	0.0307033	0.0782709	0.0469388	-0.00737111	0.0298556	0.0511725	0.187466	-0.0216785	0.000117407	0.114516	0.0120345	0.0136393	-0.0294982	-0.0139648	0.0957179	0.0665837	0.0538054	0.0330274	0.0448881	0.0808768	0.158881	0.0436205	-0.0234457	0.0352411	-0.000206203	-0.00397137	0.0419365	0.0993398	0.121979	-0.0059584	0.0410198	-0.0134162	-0.0296558	0.103044	0.0844191
role_of_ran_in_mitotic_spindle_regulation	0.133657	-0.0702894	-0.0923395	-0.129961	-0.121405	-0.102244	-0.142951	-0.227679	-0.130744	0.00509559	-0.11636	-0.146153	-0.245502	0.0644861	-0.124183	0.0915703	-0.160888	-0.0187006	-0.181479	-0.177275	-0.266102	-0.0403218	-0.188867	-0.105085	-0.0791874	-0.0772395	-0.111513	0.0667387	-0.199315	-0.0469678	-0.152624	0.191619	-0.141751	-0.126306	-0.244536	-0.138006	-0.0571557	-0.0680821	0.0407176	-0.155214	-0.21665	-0.187314	-0.217702	-0.12755	-0.105203	-0.132898	-0.20845	-0.242355	-0.0784771
ADP_signalling_through_P2Y_purinoceptor_12	0.133657	-0.0124723	0.0848748	0.0923361	-0.0764075	-0.0518257	0.0211533	0.0068792	0.109068	-0.0358095	-0.0598344	-0.0676983	0.0461006	0.0376214	-0.0791395	0.00615109	0.0176699	-0.0364163	-0.0877464	-0.00739002	0.0911973	0.0511991	-0.0877546	0.0602241	0.137605	0.0591298	0.124429	0.0781811	0.0750631	0.0540488	0.0526621	0.0632807	-0.0361736	0.0620308	0.118939	0.0271678	-0.0113612	-0.0789629	-0.0674891	-0.0332899	0.00177545	0.0828449	0.0438789	-0.024416	0.0386312	0.0238031	0.0798666	0.00915677	0.0643923
Syndecan-1-mediated_signaling_events	0.133657	-0.0396065	-0.0607759	0.0226043	0.0117195	-0.0161993	-0.0271896	0.0261157	0.0163836	-0.0536361	-0.00480835	-0.0200832	-0.105659	-0.0439104	0.00725985	-0.0289033	-0.0382354	0.0149296	0.0165399	-0.00253923	-0.0566273	0.0117858	0.00181995	0.00927801	0.0143393	-0.00744748	-0.0191702	0.0334223	-0.0594739	0.0426133	-0.00506037	-0.0345532	0.000671158	-0.0806038	0.01252	0.0246733	-0.0109882	-0.0227346	-0.0337262	0.0155975	-0.000793667	-0.0251357	0.0400931	-0.0628865	-0.016773	-0.0364633	0.0124462	0.142119	0.00741829
Regulation_of_Ras_family_activation	0.133657	-0.0296175	-0.0389359	-0.0374367	0.0430605	-0.0727724	-0.110311	-0.0597606	-0.0271171	-0.138321	-0.15591	-0.070861	-0.128129	-0.0694413	0.0141583	-0.0981459	-0.0605038	-0.112467	-0.0253318	-0.0920324	0.0214492	-0.0470186	0.0294234	0.0412104	-0.0183495	-0.044907	-0.0735974	0.061808	0.011565	-0.0188181	-0.0957339	-0.0515636	-0.0359124	-0.0264643	0.0332204	-0.0287869	-0.110783	0.0684972	0.0147957	0.0169899	-0.118116	0.0121236	-0.0539436	-0.0563103	-0.122346	-0.128726	-0.0646396	-0.0264862	-0.063217
Degradation_of_beta_catenin	0.133657	0.0136337	-0.0958406	-0.0676345	-0.0231476	-0.0402277	-0.0507643	0.00210003	0.00710496	0.198098	0.00484402	-0.0333624	-0.0232494	-0.0641075	0.0295886	-0.0484494	-0.0199018	0.097003	0.0614663	0.00360102	-0.0361109	0.0195739	0.111427	-0.078601	0.084249	0.0175241	0.0999998	0.0603228	-0.0561276	0.106241	0.117614	-0.0169353	0.0245546	-0.0280463	0.00860191	-0.0145856	0.105404	0.0481766	0.0795688	0.0124377	-0.0421432	0.0319925	-0.122944	0.117095	-0.0092352	-0.0517583	-0.0354934	-0.0455113	-0.136768
anthrax_toxin_mechanism_of_action	0.133657	0.0941558	0.167739	0.169179	0.182721	0.157313	0.201261	0.0645106	0.160984	0.166292	0.143851	0.150548	0.11756	0.142036	0.128669	0.160632	0.122544	0.17152	0.150616	0.156453	0.0925795	0.177415	0.0979843	0.0465913	0.166553	0.148252	0.164906	0.126413	0.0713734	0.147211	0.143991	0.146307	0.177525	0.125248	-0.0185435	0.181176	0.196947	0.0676706	0.137533	0.194046	0.034034	0.147033	0.0355383	0.175792	0.157061	0.198945	0.122582	-0.0449654	0.146803
Passive_Transport_by_Aquaporins	0.133657	0.286925	0.338008	0.282069	0.281943	0.177875	0.195443	0.193902	0.13284	0.189388	0.163039	0.233758	0.218136	0.281411	0.27259	0.292801	0.296954	0.299719	0.328983	0.238601	0.169077	0.308534	0.325326	0.168748	0.235376	0.220984	0.225404	0.25213	0.306924	0.291763	0.252386	0.0444131	0.201616	0.27703	0.317176	0.230427	0.19331	0.283267	0.260451	0.178784	0.289613	0.142853	0.244123	0.0973286	0.218061	0.190283	0.18098	0.305268	0.248677
Regulation_of_Telomerase	0.133657	0.038616	-0.0272083	-0.00196772	-0.0411041	-0.0372331	0.00133221	0.0468239	-0.0581822	0.0313721	-0.0459925	-0.0367984	0.0237369	0.0608111	0.0370798	-0.0142802	-0.0143414	0.0417016	0.0473198	-0.0138209	-0.0224791	-0.00586168	0.0293042	0.00516793	-0.00769979	0.0224164	-0.0216915	-0.000420502	-0.00898972	-0.00153745	0.0273311	0.018024	-0.000236769	-0.0294011	0.0373927	-0.013504	0.0399502	0.0242886	0.0199119	0.03245	-0.0174903	-0.016581	0.056217	0.069081	-0.0117275	-0.00379342	0.049425	0.0746378	-0.0226864
Regulation_of_Water_Balance_by_Renal_Aquaporins	0.133657	-0.00195457	0.0852146	0.075027	-0.046315	0.0234731	0.0176243	0.0173733	0.00414129	-0.0382168	0.0160479	0.083285	-0.0475121	0.031263	0.0522756	0.00814633	0.111346	-0.0388553	0.0485809	0.00450615	0.0300696	-0.0261059	0.0964841	0.0192183	0.11225	0.00739876	0.0620939	0.0422104	0.00972055	0.0117703	0.0500065	-0.0228723	0.0640892	0.0911861	0.129335	0.0591964	0.0104218	-0.0309196	0.0232143	-0.103439	0.00357719	-0.013099	0.0264349	0.0120293	0.0522161	0.0193676	-0.0118216	0.023396	0.0180459
Transport_of_Glycerol_from_Adipocytes_to_the_Liver_by_Aquaporins	0.133657	0.446319	0.459901	0.462338	0.46717	0.462478	0.462142	0.455198	0.462142	0.46174	0.455774	0.454858	0.459241	0.451869	0.447711	0.428227	0.450429	0.437821	0.460153	0.460355	0.429401	0.463667	0.458692	0.443513	0.46204	0.443268	0.436063	0.405004	0.442442	0.434628	0.458842	0.437511	0.446843	0.421618	0.413394	0.462063	0.464063	0.439159	0.442394	0.435823	0.445702	0.448201	0.405604	0.462962	0.47004	0.471117	0.4648	0.407556	0.44937
e2f1_destruction_pathway	0.133657	0.0644922	-0.00164197	0.0103584	-0.0119229	0.00126487	0.0175869	0.00176697	0.0120378	0.112202	-0.013189	-0.0105238	-0.0641068	0.072026	0.0205085	-0.0366621	-0.0261522	0.0900542	0.0341439	-0.00841404	-0.0513275	-0.0283155	0.0156915	-0.0186093	0.159761	-0.0189928	0.0681181	0.0918056	0.0294488	0.00406173	-0.0151391	0.114447	0.0489376	-0.0437667	-0.0713727	-0.00666864	0.034437	-0.0142977	0.118075	0.0228363	-0.0639264	-0.0800595	-0.108233	-0.0164156	-0.0107284	0.0281238	-0.0232006	-0.14257	-0.0471997
Iron_uptake_and_transport	0.133657	0.232871	0.282898	0.274258	0.160086	0.328945	0.324238	0.298378	0.328888	0.241302	0.209208	0.241218	0.279971	0.271465	0.197397	0.254049	0.241809	0.145001	0.222824	0.333097	0.283832	0.280225	0.297488	0.298202	0.293552	0.346452	0.270224	0.308114	0.304934	0.30339	0.324051	0.269309	0.317521	0.257853	0.28977	0.315576	0.162965	0.262511	0.264929	0.25137	0.311787	0.196282	0.307439	0.300374	0.292969	0.305849	0.355135	0.333324	0.302883
multi-drug_resistance_factors	0.133657	0.0566275	0.0194694	0.0122868	0.000584757	0.061296	0.0980096	0.0704719	0.044721	0.0213765	0.0462943	0.0455951	0.0539277	-0.00898415	0.088525	0.0427193	0.0838317	0.0504662	0.11107	0.0458453	0.049469	0.0335912	0.0863687	-0.0160429	-0.021099	0.0468786	0.0450715	0.0900066	-0.0540282	0.0249029	0.0833691	0.000414759	0.0944637	0.0234758	0.0415218	0.0324208	-0.00469987	0.0561823	-0.00915793	-0.02603	-0.0179014	0.0241308	0.0112934	0.0960545	0.05917	0.0524269	-0.0107169	-0.0188123	-0.00787558
Transferrin_endocytosis_and_recycling	0.133657	0.0632554	0.0560048	0.0540631	-0.0113667	0.0631875	0.103143	0.032532	0.0636211	-0.00585977	0.0366964	0.0954239	-0.0246064	-0.0437732	0.045499	0.168144	0.105545	0.00036838	0.0232159	0.152552	0.0503213	0.051702	0.0663952	-0.04542	0.0468924	0.0692605	0.0345822	0.163216	0.122698	0.094557	0.101108	0.150117	0.069545	0.0147543	-0.0791087	0.0633769	0.0180608	0.0901507	0.0317693	0.144659	-0.0214939	0.0339085	-0.0562296	0.0330686	0.0281433	0.0899763	0.159865	-0.0110448	0.119948
y_branching_of_actin_filaments	0.133657	0.077801	0.152059	0.0521821	-0.138577	0.0168524	0.0684131	-0.127047	-0.0467707	-0.000108304	-0.0632354	0.0286708	-0.0527065	0.0464735	0.0519822	0.141403	-0.0877381	0.0175198	-0.0327274	-0.0782901	-0.0974277	-0.0100477	-0.029387	-0.0800126	-0.066411	-0.0681949	0.00692132	0.0531115	-0.114173	-0.0325098	-0.120645	0.16913	0.0168912	-0.0571704	-0.0398785	-0.054649	-0.0319379	0.0158637	-0.0522315	-0.0463354	0.00428146	0.078377	-0.096284	-0.0849271	-0.0485013	0.0650178	0.0723821	-0.0308371	0.00159847
ras_signaling_pathway	0.133657	0.00361233	0.116301	0.0256684	0.0371175	0.0166653	0.0323863	0.0539194	0.0389807	0.0254586	0.00354734	0.0111733	0.116718	0.0630231	0.0132446	-0.0274103	-0.0240219	-0.00590188	0.0491418	0.0166864	0.140417	0.0346832	0.0383645	-0.0129628	0.0189099	0.0234225	0.0124747	-0.0230711	0.145096	0.00448183	0.0119524	0.024966	0.0131438	-0.0286062	0.0925439	0.0234362	-0.0320254	0.038096	-0.0650583	0.00985173	0.0837081	0.0982953	0.100458	0.0401993	0.0332173	0.0107276	0.0782895	0.121109	0.101939
carm1_and_regulation_of_the_estrogen_receptor	0.133657	0.0138498	0.0642967	0.0655093	0.092619	0.0117142	0.0717457	0.0169595	0.0646809	-0.013897	0.0872435	0.0806619	-0.062173	0.0635857	0.0492086	0.0475803	-0.0198399	0.0858174	0.108961	0.0361797	0.0215052	0.038916	0.0725844	0.0463383	0.107983	-0.0791627	-0.0272816	0.0236236	0.0499172	0.0551818	0.139754	-0.0636139	0.125132	-0.0346158	0.00797215	0.0799713	-0.0225518	0.0671141	0.0486831	0.0406357	0.019432	0.128151	0.0948015	0.0617471	0.0377928	-0.0694079	0.0576372	0.0512245	0.0602309
Ion_transport_by_P-type_ATPases	0.133657	0.155174	-0.00490009	0.130435	0.0211511	-0.0727284	-0.0467476	0.0434965	0.0771838	0.0893258	-0.0519074	0.0969142	0.0395364	-0.109384	-0.0538427	-0.0574826	0.113294	0.0811009	-0.000615519	0.0180285	0.11457	0.00325137	-0.00796674	0.014131	-0.0304246	-0.0980606	0.0190239	0.00448084	0.0655442	-0.0183154	-0.0795584	-0.114477	-0.187058	-0.112488	0.146875	0.0256638	0.0591595	0.058827	0.0882739	0.0631001	0.115874	0.195931	0.0670708	0.187879	0.0782702	-0.0950387	-0.082284	0.117644	-0.0102672
caspase_cascade_in_apoptosis	0.133657	0.00199489	0.0600429	-0.0529067	-0.0208307	-0.0245203	0.0120935	0.0118443	0.0238628	0.0908487	0.0089219	-0.0758838	0.192863	0.0739852	-0.0657768	0.00681358	0.00958615	0.100055	0.00818776	-0.0376816	0.0435132	0.144834	-0.0480198	-0.0307695	0.118089	0.0233573	0.200323	0.0940028	0.107102	-0.0545607	-0.00675106	0.133374	-0.0529315	0.00181567	0.0633315	0.0358376	-0.0949018	-0.00536274	0.0314589	0.081699	0.0153452	0.0725325	0.145979	-0.0115698	-0.0553019	-0.00304616	0.0725386	0.0585626	0.033727
Ligand-gated_ion_channel_transport	0.133657	0.00175288	-0.00960778	-0.00996859	0.0127207	0.0214091	0.0520787	0.0154784	-0.0203037	0.0782413	0.0849513	0.0630241	-0.0476326	0.191545	0.0631456	0.099929	-0.04636	-0.0361507	-0.0192376	0.196259	0.0492855	0.131923	0.0985673	0.00275599	0.0692885	0.00262649	0.0514731	0.0767305	0.0447337	0.117943	0.00238414	0.0365035	0.032733	0.16023	-0.106537	0.0216338	0.0411091	0.0481722	-0.0256984	0.107997	-0.0286991	0.0126849	0.112758	0.0289657	0.0347229	0.0937356	0.173251	-0.0138056	-0.04946
regulation_of_eif-4e_and_p70s6_kinase	0.133657	0.0812369	-0.0338183	0.0856799	0.10393	0.119681	0.0781492	0.0706021	0.0876312	0.10964	0.0643025	0.068756	0.0516077	0.0890374	0.0728567	0.0673321	0.104637	0.125791	0.0654005	0.101325	0.13618	0.148499	0.0668022	0.0974832	0.0804001	0.193931	0.0830707	0.175941	0.0471488	0.131988	0.0515801	0.108964	0.158913	0.123189	0.0856278	0.0412206	0.0898267	0.103745	0.113614	0.0983774	0.0459421	0.0358871	0.104511	0.120251	0.0575956	0.0783436	0.11831	0.0539323	0.0972586
visceral_fat_deposits_and_the_metabolic_syndrome	0.133657	-0.0125776	0.133058	0.2082	0.0654531	0.0818694	0.239623	0.21151	0.0736329	0.0848838	0.198346	0.121098	0.0647635	0.0729484	0.137693	0.161251	0.308746	0.165727	0.281369	0.0699409	0.177901	0.071107	0.1286	0.226507	0.0130933	0.223603	0.0847509	0.243351	0.205071	0.219441	0.167189	0.188046	0.142261	0.284373	0.387943	0.143037	0.155069	0.148034	0.158943	0.195333	0.164234	0.263151	0.127241	0.210109	0.154714	0.0175874	0.201256	0.164507	0.0968546
p38_MAPK_signaling_pathway	0.133657	0.0417165	0.0600276	0.0703009	0.113566	0.113459	0.0634743	0.11927	0.115955	0.0489182	0.0904155	0.0736428	0.108062	0.122828	0.101935	0.112471	0.165913	0.133498	0.109933	0.129291	0.114009	0.0666184	0.099707	0.0954689	0.134733	0.120834	0.103195	0.127634	0.0874211	0.191009	0.141802	0.0436666	0.12177	0.100444	0.106765	0.139696	0.0564608	0.118735	0.103638	0.0997548	0.0908335	0.0837366	0.0708307	0.101898	0.104457	0.0681801	0.0654598	0.094957	0.0666
Ubiquinol_biosynthesis	0.133657	0.415632	0.400676	-0.438091	0.300969	0.303282	-0.443077	-0.451814	0.307651	-0.485169	-0.449398	0.29732	0.389626	-0.491028	-0.451865	-0.488767	0.392761	-0.481777	-0.442614	0.407871	0.242739	0.407152	-0.452071	-0.452225	0.406792	-0.486197	0.402063	-0.476021	-0.441329	-0.486094	-0.447342	0.286065	-0.472732	-0.441021	0.336792	-0.489486	0.317621	0.28735	-0.481366	-0.48666	0.25862	-0.484501	0.322093	0.299171	-0.44174	-0.431718	0.309193	0.168216	-0.447497
Integration_of_energy_metabolism	0.133657	0.074157	0.181322	-0.0355498	-0.0156659	0.0272744	0.0164483	-0.0440863	-0.0491493	0.229696	0.0708028	0.0731982	0.0509513	0.205706	-0.0180501	0.183825	0.0334731	0.326085	-0.064855	-0.0290319	-0.034368	0.189058	-0.0408219	-0.00555172	-0.0233345	0.0593979	0.0578285	0.139719	0.0351285	0.11924	-0.0497372	0.217436	0.0927578	-0.0959303	-0.0585203	-0.133721	0.0864024	0.00872034	0.0339798	0.0921958	-0.0173905	0.159047	-0.0670263	-0.0740719	-0.113243	0.0855071	-0.138871	-0.220501	0.13947
Synthesis_of_Hepoxilins_(HX)_and_Trioxilins_(TrX)	0.133657	0.405305	-0.223285	-0.27466	0.256996	0.261156	-0.227086	-0.292129	-0.191325	0.245983	-0.289003	-0.251817	0.224832	-0.301685	0.379723	-0.294482	-0.255396	0.247617	0.253583	-0.23671	0.327683	-0.239057	-0.252452	-0.267461	0.242576	-0.288142	-0.292376	0.227641	-0.323467	0.337751	0.246554	-0.282892	-0.267895	-0.299328	-0.295603	0.259628	-0.240883	-0.250808	-0.291973	0.241293	0.215283	-0.277887	-0.299227	-0.254501	0.400061	-0.228411	0.399116	-0.31582	0.226103
Synthesis_of_(16-20)-hydroxyeicosatetraenoic_acids_(HETE)	0.133657	0.303431	0.393822	0.346614	0.397963	0.399216	0.448353	0.409794	0.419899	0.346672	0.429051	0.413792	0.337879	0.284903	0.421882	0.375063	0.435365	0.31036	0.396025	0.446222	0.374684	0.326391	0.426273	0.360419	0.354798	0.335862	0.396448	0.326631	0.322017	0.383467	0.431442	0.253899	0.353156	0.293441	0.359158	0.380077	0.389682	0.427853	0.341648	0.306696	0.328611	0.219414	0.370151	0.381457	0.397403	0.359237	0.447768	0.340015	0.364286
Synthesis_of_12-eicosatetraenoic_acid_derivatives	0.133657	0.27883	0.00813612	0.113473	0.187323	0.0556016	0.00991254	-0.0671222	0.0209617	0.002994	0.00259771	0.138585	0.156743	0.127503	0.0826003	0.0826638	0.0220909	0.0582545	0.0645916	0.00666281	0.195033	-0.0474379	-0.139496	-0.0149569	0.212767	-0.148177	0.0806968	0.152332	-0.0424598	0.12473	0.119218	0.112579	-0.0524382	0.109723	-0.0377472	0.124098	-0.0543986	0.0879809	0.115382	0.161926	0.0292762	0.0180468	-0.0378069	-0.0943203	0.101759	0.0098571	0.15803	-0.0584334	0.157228
Synthesis_of_Lipoxins_(LX)	0.133657	-0.00120039	-0.207112	-0.10616	-0.0560715	-0.0504809	-0.209207	-0.250161	-0.209098	-0.0630729	-0.125703	-0.225863	0.0741027	-0.259835	-0.0156047	-0.134426	-0.0673645	-0.0575336	-0.0544421	-0.108557	0.030275	-0.112063	-0.2364	-0.0761231	0.0878221	-0.260432	-0.136358	-0.0904024	-0.0933133	0.0476626	0.0284218	-0.247874	-0.214876	-0.262815	-0.108165	0.0941276	-0.217583	-0.235144	-0.139506	-0.0658221	0.0603605	0.0104207	-0.0325744	-0.230657	6.7e-05	-0.203434	0.0926757	-0.0223932	0.0716866
Sphingolipid_de_novo_biosynthesis	0.133657	0.0658752	-0.0761223	-0.060857	0.0549859	0.123697	0.0481162	0.0527596	0.106356	0.117374	0.0719132	0.242034	0.0734339	0.0560147	0.0481765	0.0857893	0.0720814	0.0956882	0.108323	0.120772	0.051771	0.14525	-0.0290915	0.0855975	0.0814283	0.0942534	0.0754156	0.165096	0.0767516	0.219329	0.239796	0.0788167	0.0789461	0.127017	0.14715	0.100757	0.0419355	0.104742	0.153922	0.0624783	0.129729	-0.0260926	0.0218052	0.120206	0.155749	0.150256	0.167601	0.0704134	-0.0180458
Glycosphingolipid_metabolism	0.133657	0.113993	0.243573	0.115065	0.206561	0.164685	0.281508	0.14978	0.18337	0.174078	0.177632	0.217385	0.141389	0.258493	0.158191	0.157144	0.232133	0.282289	-0.00260583	0.20464	0.0507397	0.299339	0.114068	0.0102343	0.0415325	0.18637	0.177162	0.204478	0.162761	0.259836	0.10665	0.297574	0.240581	0.0853299	0.0969456	0.267267	0.0467281	0.0457501	0.116849	0.16422	0.130641	0.243306	0.242051	0.13998	0.136874	0.179516	0.192037	0.131389	0.167814
Synthesis_of_epoxy_(EET)_and_dihydroxyeicosatrienoic_acids_(DHET)	0.133657	0.327025	0.370282	0.375766	0.374354	0.376982	0.44188	0.416981	0.426318	0.367269	0.417904	0.418753	0.366453	0.300486	0.433639	0.369239	0.427726	0.325108	0.373105	0.439494	0.344068	0.278815	0.436472	0.356554	0.315013	0.346614	0.365496	0.302983	0.285293	0.357287	0.421132	0.268034	0.385294	0.318923	0.363115	0.375355	0.390284	0.415453	0.369664	0.321917	0.359348	0.315776	0.351998	0.378552	0.429686	0.391041	0.440611	0.314599	0.359326
FAS_(CD95)_signaling_pathway	0.133657	0.0200903	0.0855323	0.0155462	0.065418	0.0585137	0.0325939	0.0618014	0.0594144	0.0657387	0.0552243	0.0569152	0.16027	0.0293745	0.0258118	0.081706	0.122033	0.0593644	0.0311997	0.0979728	0.106773	0.075492	0.0400053	0.0524499	0.112462	0.122652	0.0883636	0.0920126	0.0931292	0.101521	0.0671829	0.0647172	0.0990103	0.0952659	0.090777	0.0271074	0.0703781	0.0968991	0.0195104	0.0850656	0.0630162	0.102383	0.0497477	0.0744988	0.0510341	0.0439151	0.11283	0.0823437	0.123291
Activation_of_NOXA_and_translocation_to_mitochondria	0.133657	0.219142	-0.316452	-0.370447	-0.381144	-0.371999	-0.365188	-0.381109	-0.370232	-0.141188	-0.319711	-0.37506	-0.383007	0.156278	-0.383643	-0.376437	-0.377528	-0.225108	-0.368766	-0.368203	-0.382655	-0.0837254	-0.151162	-0.386818	-0.310217	-0.382432	0.124484	-0.291923	-0.397219	-0.389607	-0.37825	-0.0487125	-0.14364	-0.350309	-0.400968	-0.371342	-0.296225	-0.284054	0.302439	-0.062639	-0.389862	-0.333701	-0.3761	-0.383489	-0.374218	-0.138532	-0.374069	-0.412085	-0.379235
Activation_of_PUMA_and_translocation_to_mitochondria	0.133657	0.21379	-0.16034	-0.177029	-0.371989	-0.179549	-0.166188	-0.191985	-0.365702	-0.137182	-0.169232	-0.371529	-0.069223	0.215987	-0.379418	-0.378365	-0.193464	-0.0167206	-0.364848	-0.176519	-0.375753	0.0123598	-0.154359	-0.383593	-0.165112	-0.376236	0.290549	-0.292958	-0.391945	-0.385225	-0.194552	0.0242421	-0.143175	-0.352307	-0.241561	-0.366273	-0.133469	-0.280878	0.35267	0.12011	-0.0527396	-0.208354	-0.247855	-0.379262	-0.369439	0.0729676	-0.176931	-0.0791223	-0.376023
Activation_of_BAD_and_translocation_to_mitochondria	0.133657	-0.0284452	-0.121328	-0.0600725	-0.156858	-0.103334	-0.171386	-0.12132	-0.054875	-0.182364	-0.0934507	-0.0814936	-0.170303	-0.0562976	-0.0611367	-0.065432	-0.116886	-0.135311	-0.164567	-0.100044	-0.178126	-0.0619277	-0.219241	-0.0730311	-0.189965	-0.123501	-0.118182	0.0276479	-0.132193	-0.156062	-0.140584	-0.0374554	-0.09639	-0.187216	-0.187077	-0.162302	-0.0565311	-0.0944577	-0.0209737	-0.124525	-0.144167	-0.0930666	-0.180688	-0.0881441	-0.13597	-0.17933	-0.0933311	-0.208258	-0.194384
BH3-only_proteins_associate_with_and_inactivate_anti-apoptotic_BCL-2_members	0.133657	-0.0973856	0.0742991	0.0498099	0.0166764	-0.103403	0.105529	-0.0718056	-0.0287838	0.0432955	0.117677	0.013061	0.0462061	0.0251509	-0.0665634	-0.0762402	0.00286136	0.162566	-0.21108	-0.0401306	0.0336787	0.0843887	-0.0843894	0.0498697	-0.0639152	0.0546737	0.0919171	-0.0241646	-0.0682043	0.031747	0.0268347	-0.019631	-0.118243	-0.0150974	0.0301526	-0.0179327	0.0229214	-0.0578522	-0.00161486	0.111071	0.104747	0.070684	-0.00432172	-0.179022	-0.00395723	0.14044	-0.00589004	0.0347496	-0.0447515
Activation__translocation_and_oligomerization_of_BAX	0.133657	0.185391	0.119512	0.330241	0.326871	-0.180134	0.336354	0.117031	0.322835	0.354684	0.312749	-0.0193728	0.300443	0.152885	0.112107	-0.0233352	0.299481	0.363306	-0.178761	0.323679	0.279577	0.42997	-0.0195193	0.296093	0.302143	0.325395	-0.0319035	-0.0274117	0.260085	-0.0461285	0.31431	0.179499	-0.00660862	0.318376	0.246777	0.32095	-0.0103318	-0.0145541	-0.0191944	0.437124	0.154224	0.306669	0.217191	-0.188112	-0.176602	0.195273	0.189963	0.226779	0.16134
Activation_of_BIM_and_translocation_to_mitochondria	0.133657	0.000263805	-0.0431049	-0.0655378	-0.343939	-0.0346862	-0.0307341	-0.318934	-0.40281	-0.014115	-0.321219	-0.330074	-0.161209	-0.0810781	0.176393	-0.0851399	-0.226931	0.271964	-0.333859	-0.343878	-0.0158885	-0.011283	0.132931	-0.0741952	-0.406665	-0.0646012	-0.0651243	0.169412	-0.343774	-0.079189	-0.343964	-0.236163	-0.30958	-0.148479	0.0919447	-0.0595548	0.293458	-0.28521	-0.405714	-0.0186549	-0.169509	-0.0538247	-0.199706	-0.0718011	-0.216975	-0.037682	-0.326765	-0.433381	-0.0877521
Activation_of_BMF_and_translocation_to_mitochondria	0.133657	-0.413374	-0.428986	-0.419502	-0.0506221	-0.0221608	-0.134969	0.0721523	-0.0369496	0.0577555	0.292226	-0.0464512	-0.069041	-0.307915	0.163295	-0.35434	0.108742	-0.000540882	-0.0433892	-0.0489207	0.137029	-0.16198	-0.0322395	0.106293	-0.0554784	-0.0525192	0.0658019	0.00338174	-0.0836098	0.140879	-0.0312796	-0.299846	-0.0207633	0.0693623	0.20092	-0.0509509	-0.0310166	0.172393	0.133872	-0.314978	-0.0811814	-0.194317	-0.123211	0.0438553	0.07505	-0.15354	-0.0332904	-0.0623314	-0.443194
Activation_and_oligomerization_of_BAK_protein	0.133657	0.0049735	0.00512685	0.00153148	0.000978605	-0.159504	0.00797705	-0.178255	-0.00919053	-0.00742276	0.0206877	0.00846062	-0.0216221	0.258607	-0.170405	-0.017844	-0.0150909	-0.00984094	-0.148476	-0.00576758	-0.020441	-0.0149404	-0.0130948	-0.020394	-0.0145655	0.00846244	-0.0129304	0.268119	-0.0461969	-0.0143166	-0.0181825	-0.00512074	0.0267068	0.009033	-0.0454027	-0.0112076	0.00910363	-0.00816032	0.0119856	-0.0126262	-0.0387186	-0.0360099	-0.0709869	-0.173828	-0.140176	0.30057	0.00532397	-0.0636424	0.00332646
Insulin-mediated_glucose_transport	0.133657	0.0263325	-0.0484567	-0.046368	-0.0571431	-0.0272173	-0.000313035	-0.00571089	-0.0363177	0.0205966	-0.040686	-0.0368575	-0.0122567	0.025811	0.0258385	-0.0526541	-0.0411925	0.0546973	0.00130365	-0.00450984	-0.0449502	-0.050265	0.0127341	-0.0660021	-0.0456428	0.0196866	-0.00594342	0.0411391	-0.0831905	-0.0449051	0.00280951	0.0471332	-0.00807191	-0.0482616	-0.0769583	-0.0149008	0.00991548	0.0250522	0.0201113	-0.0469675	-0.0626729	-0.0271453	-0.121609	0.00557297	-0.0565752	-0.0695958	0.0109112	-0.100471	-0.0828308
mitochondrial_fatty_acid_beta-oxidation_of_unsaturated_fatty_acids	0.133657	0.471825	0.442975	0.461049	0.453653	0.452465	0.464784	0.460457	0.452557	0.41584	0.446922	0.458459	0.441236	0.438937	0.452305	0.456846	0.439899	0.444008	0.461882	0.450081	0.436702	0.417425	0.46121	0.435279	0.448951	0.324167	0.449761	0.460981	0.428997	0.444515	0.460671	0.459311	0.32996	0.444029	0.40516	0.464221	0.457225	0.43672	0.448932	0.427588	0.439153	0.431278	0.3975	0.453273	0.453233	0.467176	0.461527	0.40372	0.453818
Beta_oxidation_of_decanoyl-CoA_to_octanoyl-CoA-CoA	0.133657	0.483025	0.472636	0.475103	0.46624	0.477296	0.477324	0.474955	0.476872	0.435994	0.47315	0.472781	0.470939	0.469176	0.467227	0.453532	0.467509	0.431259	0.47612	0.475422	0.43583	0.453744	0.4756	0.462781	0.477674	0.463674	0.470079	0.45638	0.462283	0.458824	0.473441	0.457299	0.464758	0.437331	0.439025	0.477441	0.465729	0.451617	0.449016	0.419884	0.468104	0.415105	0.433843	0.477904	0.479158	0.480103	0.475279	0.439907	0.469313
Beta_oxidation_of_octanoyl-CoA_to_hexanoyl-CoA	0.133657	0.483025	0.472636	0.475103	0.46624	0.477296	0.477324	0.474955	0.476872	0.435994	0.47315	0.472781	0.470939	0.469176	0.467227	0.453532	0.467509	0.431259	0.47612	0.475422	0.43583	0.453744	0.4756	0.462781	0.477674	0.463674	0.470079	0.45638	0.462283	0.458824	0.473441	0.457299	0.464758	0.437331	0.439025	0.477441	0.465729	0.451617	0.449016	0.419884	0.468104	0.415105	0.433843	0.477904	0.479158	0.480103	0.475279	0.439907	0.469313
Beta_oxidation_of_hexanoyl-CoA_to_butanoyl-CoA	0.133657	0.476025	0.468273	0.470842	0.446337	0.470451	0.47097	0.46585	0.470323	0.438569	0.465873	0.46562	0.462574	0.461448	0.459417	0.42845	0.459524	0.403375	0.469458	0.468757	0.423554	0.471913	0.468518	0.454223	0.470844	0.443457	0.47677	0.429607	0.453607	0.435722	0.465842	0.438191	0.446931	0.393532	0.42722	0.470918	0.442783	0.439335	0.43625	0.408696	0.457632	0.383621	0.420219	0.471331	0.473045	0.474425	0.468927	0.423796	0.461196
Beta_oxidation_of_butanoyl-CoA_to_acetyl-CoA	0.133657	0.476025	0.468273	0.470842	0.446337	0.470451	0.47097	0.46585	0.470323	0.438569	0.465873	0.46562	0.462574	0.461448	0.459417	0.42845	0.459524	0.403375	0.469458	0.468757	0.423554	0.471913	0.468518	0.454223	0.470844	0.443457	0.47677	0.429607	0.453607	0.435722	0.465842	0.438191	0.446931	0.393532	0.42722	0.470918	0.442783	0.439335	0.43625	0.408696	0.457632	0.383621	0.420219	0.471331	0.473045	0.474425	0.468927	0.423796	0.461196
Beta_oxidation_of_palmitoyl-CoA_to_myristoyl-CoA	0.133657	0.460974	0.44703	0.404486	0.417234	0.455024	0.451805	0.397455	0.46429	0.452125	0.402639	0.446102	0.441938	0.391847	0.439006	0.398793	0.441771	0.454659	0.451143	0.452434	0.393506	0.455029	0.448944	0.434502	0.199243	0.417225	0.40585	0.3977	0.38041	0.174572	0.201607	0.407917	-0.308792	0.391845	0.40283	0.453337	0.453077	0.454054	0.191276	0.405146	0.435504	0.437158	0.393207	0.453666	0.454936	0.458201	0.449628	0.390271	0.440174
Beta_oxidation_of_lauroyl-CoA_to_decanoyl-CoA-CoA	0.133657	0.476025	0.468273	0.470842	0.446337	0.470451	0.47097	0.46585	0.470323	0.438569	0.465873	0.46562	0.462574	0.461448	0.459417	0.42845	0.459524	0.403375	0.469458	0.468757	0.423554	0.471913	0.468518	0.454223	0.470844	0.443457	0.47677	0.429607	0.453607	0.435722	0.465842	0.438191	0.446931	0.393532	0.42722	0.470918	0.442783	0.439335	0.43625	0.408696	0.457632	0.383621	0.420219	0.471331	0.473045	0.474425	0.468927	0.423796	0.461196
JNK_signaling_in_the_CD4__TCR_pathway	0.133657	-0.0359245	0.125175	-0.0306517	-0.0246736	0.00389976	0.0130163	0.00778592	-0.0139087	-0.0163264	-0.0424321	-0.0145161	0.139849	-0.016059	0.0823382	-0.0461852	0.019571	0.0024685	-0.0454542	-0.0326169	0.193144	0.0729296	-0.0281955	0.0527347	-0.117317	0.00841751	-0.0628975	0.0412111	0.110095	0.0224637	-0.0465994	0.00780022	0.114306	0.0248496	0.201351	0.0551263	-0.033072	-0.0432042	-0.0368361	0.00235018	0.0618208	0.154914	0.15585	0.00460998	0.00368223	-0.0461679	0.0699737	0.174259	0.175605
cbl_mediated_ligand-induced_downregulation_of_egf_receptors_pathway	0.133657	0.219896	0.191326	0.160402	0.156124	0.188061	0.218982	0.151599	0.165189	0.18151	0.131106	0.146421	0.167887	0.15259	0.173009	0.162019	0.101362	0.149962	0.1579	0.144636	0.129124	0.171767	0.131885	0.150402	0.146694	0.179069	0.11433	0.114707	0.138667	0.166777	0.120891	0.113705	0.133864	0.142086	0.142894	0.145222	0.231563	0.141043	0.159275	0.158304	0.123198	0.156053	0.0863662	0.172559	0.165831	0.160707	0.145628	0.140058	0.175887
FOXA2_and_FOXA3_transcription_factor_networks	0.133657	0.319342	0.304629	0.308801	0.344997	0.311581	0.285203	0.326883	0.311043	0.288081	0.279651	0.294202	0.276066	0.304568	0.277182	0.294862	0.296022	0.25019	0.319012	0.272245	0.290164	0.28949	0.292869	0.306437	0.296646	0.323825	0.252578	0.263843	0.282351	0.33769	0.308642	0.308252	0.256126	0.308106	0.295109	0.335672	0.26052	0.291908	0.288066	0.300998	0.326437	0.337837	0.29803	0.277312	0.291152	0.28226	0.240839	0.289656	0.300224
Circadian_rhythm_pathway	0.133657	-0.0580045	-0.0408641	-0.00277187	0.021821	0.0184558	-0.0102315	0.00620333	-0.0147861	0.00936288	0.059589	0.125435	-0.0232186	0.101544	0.0656729	0.0453797	0.0459824	0.105829	0.177968	0.00541461	0.0851527	-0.112519	0.0253929	0.130391	0.0852301	0.0642504	-0.112396	0.0704885	0.201926	0.0768136	0.0218931	-0.116699	0.14233	0.132754	0.0514705	0.0754368	0.0964006	-0.00838524	0.0481473	-0.0662486	-0.0541174	-0.102313	0.00775012	-0.00522045	0.100572	-0.0948206	0.0521053	-0.142559	-0.0225952
Arf6_downstream_pathway	0.133657	0.104138	0.0903489	0.134408	0.157279	0.087132	0.190497	0.143552	0.084417	0.102476	0.128831	0.100167	0.115516	0.159664	0.0403663	0.124439	0.144944	0.0783089	0.133101	0.106842	0.112387	0.150273	0.0518427	0.210207	0.0937006	0.115897	0.137107	0.124261	0.0476824	0.120732	0.145208	0.0896033	0.141306	0.0680024	0.0889053	0.116723	0.160475	0.118805	0.134433	0.161071	0.0982619	0.17035	0.105764	0.0467842	0.0821426	0.117885	0.0998722	0.122117	0.115031
aspirin_blocks_signaling_pathway_involved_in_platelet_activation	0.133657	0.0901245	0.0347514	0.157441	0.086801	0.0633953	0.130402	0.120809	0.0811002	0.0831296	0.224308	0.180876	0.078151	0.120707	0.102695	0.100125	0.114015	0.0675864	0.0688335	0.120365	0.0594149	0.153224	0.0868079	0.150012	0.122603	0.106293	0.204366	0.162848	0.18042	0.179397	0.118858	0.204592	0.204043	0.0875826	0.138799	0.104522	0.224587	0.150226	0.0460845	0.0622701	0.0807192	0.148704	0.0806858	0.0698784	0.102896	0.134858	0.0825432	0.0313941	0.0953111
Lissencephaly_gene_(LIS1)_in_neuronal_migration_and_development	0.133657	-0.127022	-0.0760254	-0.0973169	-0.0369562	-0.0469464	0.00882587	-0.0517146	-0.0752702	-0.0714983	-0.0402344	0.0356962	-0.0581362	-0.0783058	-0.00904075	-0.0676371	-0.129493	-0.0934091	0.0220505	-0.0647134	-0.0590055	-0.0603619	0.0093682	-0.0392727	-0.0384627	-0.0905012	-0.0754067	-0.0458719	-0.0705797	-0.107973	0.0400562	-0.000834313	-0.00371792	-0.0799533	-0.0648462	-0.0570496	-0.0781753	-0.00421259	-0.100188	-0.0883807	-0.109178	-0.0588745	-0.103608	-0.0159277	0.0137684	-0.0295149	0.0348067	-0.111081	-0.0410809
eicosanoid_metabolism	0.133657	0.0819431	-0.0505673	-0.0362978	-0.0151984	-0.0425038	-0.0943621	0.0222735	0.023248	-0.216909	-0.0477214	-0.0428435	0.0536556	0.140856	0.0648973	0.0414479	-0.000917062	-0.120398	-0.223016	-0.0292801	0.018378	0.0522877	-0.263016	0.130903	-0.0271784	-0.156795	-0.0859237	-0.14432	0.0796076	0.0658043	-0.169583	-0.104429	-0.0210783	0.0445623	0.241037	-0.0655834	-0.134167	0.0105824	0.0765385	-0.249055	0.137636	0.196984	0.242844	-0.226179	-0.0987429	0.0118728	-0.253858	0.199605	-0.117621
Retrograde_neurotrophin_signalling	0.133657	0.0797306	0.0548491	0.153469	0.0585306	0.130138	0.151922	0.00457231	0.0830796	0.0104502	0.132578	-0.0269121	0.128827	0.0713306	0.0647399	0.142104	0.0680306	0.132738	-0.0613123	0.0711748	0.0357316	0.12028	0.0400519	0.0888136	0.131102	0.0826771	0.0474139	0.0593121	0.0405662	0.123495	0.0631438	0.101559	0.0757732	-0.0483871	0.0505435	0.128409	0.0498925	-0.0045216	0.080055	0.0433445	0.0519514	0.125926	0.0814533	-0.00719281	-0.0624992	0.0828073	0.0143572	0.0184293	0.138915
Signaling_by_PDGF	0.133657	-0.0368562	-0.146527	0.0455338	0.0443467	-0.037768	-0.13609	-0.0648556	-0.04207	-0.12758	-0.00126789	-0.00737199	-0.106775	-0.0432134	0.0466419	-0.00747853	0.0867492	-0.0967313	-0.0937194	-0.114404	0.0311883	0.0158726	0.0347391	-0.0638942	-0.022356	-0.0545988	-0.0466405	-0.146856	0.00495803	-0.10541	-0.153612	-0.158076	0.0465702	-0.0155423	0.0934063	-0.0283764	-0.159643	-0.11998	-0.0112147	0.0114549	0.0187148	0.0441238	-0.0292009	-0.0743261	0.00720208	-0.0543895	-0.140283	0.187655	-0.0266361
Downstream_signal_transduction	0.133657	-0.0127317	-0.10272	-0.00786214	0.101954	-0.00382263	-0.0865718	-0.0715628	-0.0844327	-0.0201621	-0.00632389	0.0109866	-0.0835534	-0.0389975	0.0359697	-0.0192776	0.104995	0.00220256	-0.0517346	-0.0174252	0.0846715	0.0751289	0.0621572	-0.0355444	-0.0172607	0.00949382	-0.00380448	0.00175954	0.0492712	-0.0457963	-0.0668529	-0.0665798	0.112694	0.0320213	0.0596559	-0.0300918	-0.0233311	0.0112908	0.0232506	0.082744	-0.0678119	0.0232058	-0.0284583	0.0449735	0.0185113	0.0354782	-0.0114525	0.172504	-0.0579721
PLC-gamma1_signalling	0.133657	0.13205	-0.105601	0.125579	-0.11622	0.114716	0.133125	0.0336847	0.115707	-0.146822	0.160089	-0.128502	0.0161145	0.0862285	0.0938441	0.0990789	0.091488	0.0849894	-0.12336	-0.122148	0.0534623	0.0984811	0.159905	0.0841503	0.105256	-0.0579837	0.102805	0.0231614	-0.0292819	0.0752033	-0.135767	-0.128263	-0.0996464	-0.139567	0.300147	0.173278	0.0664205	0.0351399	0.0833983	0.0581415	0.00385291	0.0756274	0.0297993	-0.0559516	-0.120727	0.0736262	-0.113754	0.0307415	0.0942611
PI3K/AKT_activation	0.133657	0.137675	-0.0734466	0.149738	0.0997283	0.192425	0.131502	0.119878	0.144028	0.118274	0.140883	0.0674245	0.112184	0.123243	0.141126	0.117453	0.0195545	0.181555	0.0683572	0.139373	0.155391	0.186679	0.177952	0.11286	0.0444007	0.109951	0.128926	0.138891	0.100683	0.150258	0.0895663	0.0729309	0.13431	0.0975369	0.216517	0.142234	0.139486	0.194317	0.123846	0.17226	0.0864397	0.0842339	0.0788414	0.172712	0.0852922	0.138474	0.129414	0.0859069	0.121157
Signalling_to_STAT3	0.133657	0.139332	-0.222739	0.130168	-0.224611	0.121118	0.134262	0.0210787	0.121388	-0.264515	0.114643	-0.238795	0.002742	0.103017	0.10733	0.111164	0.112363	0.086186	-0.23072	-0.235176	0.154727	0.100378	0.117658	0.101308	0.115426	-0.234732	0.113335	0.00797389	-0.037752	-0.00508779	-0.239504	-0.239199	-0.202624	-0.246838	0.431126	0.123962	0.0442743	0.0180932	0.0898706	0.0179647	-0.00585099	0.0980753	0.152384	-0.242876	-0.227531	0.0508862	-0.227482	0.212673	0.106674
Signalling_to_ERK5	0.133657	-0.0781456	-0.166088	-0.178245	-0.0867877	-0.00765593	-0.0679377	-0.0262868	-0.00197097	-0.108191	0.120585	-0.189516	0.12494	-0.123454	-0.0403709	-0.0367647	-0.113305	-0.0249418	-0.0143651	-0.00677634	0.137667	-0.194715	-0.0294717	-0.0503095	-0.0975877	-0.204087	-0.0314279	-0.216284	-0.167461	-0.0559375	-0.0295192	-0.0984005	-0.0785153	0.214917	0.0840292	-0.0971912	0.00348032	-0.0932374	-0.0376723	-0.213751	-0.15389	-0.153254	-0.118484	-0.0849459	0.154948	-0.0672339	0.00224413	-0.144937	-0.0426606
VEGF_ligand-receptor_interactions	0.133657	0.0624607	-0.1462	0.187918	-0.0121244	-0.0026917	-0.00187193	0.0505572	0.0192091	-0.216606	0.116862	0.174853	-0.0735754	0.159533	0.236586	-0.0121131	0.0529664	-0.0523073	0.0612731	-0.0571652	0.0850508	-0.0122594	0.0548836	0.0104256	0.114457	0.110895	0.0414823	0.186441	0.124736	-0.159526	0.0668754	-0.0650349	0.228052	0.223614	0.0449453	0.117123	0.0955337	-0.0251442	0.299092	0.0720044	0.27586	0.140328	0.104003	0.0712311	0.180093	-0.0558047	-0.0720475	0.00708602	0.0606988
Toll_Like_Receptor_TLR1_TLR2_Cascade	0.133657	0.137616	0.137576	0.137383	0.136269	0.12914	0.145519	0.111055	0.1318	0.116721	0.122152	0.252362	0.284728	0.0965453	0.104691	0.110553	0.102611	0.120584	0.123197	0.25475	0.07875	0.127745	0.115131	0.0953179	0.124048	0.123873	0.12428	0.0908491	0.25183	0.101161	0.10537	0.131026	0.142754	0.108423	0.218233	0.128421	0.144485	0.116251	0.111493	0.115538	0.0866188	0.0851892	0.143178	0.125876	0.128478	0.14389	0.0736437	0.130093	0.101146
regulation_of_cell_cycle_progression_by_plk3	0.133657	-0.0396594	-0.00448041	-0.050784	-0.0684912	-0.112543	-0.0814646	-0.105898	-0.0956603	-0.0833886	-0.180828	-0.108467	-0.00484237	0.0174792	-0.0741476	-0.0879109	-0.0635204	-0.0942869	-0.0509185	-0.0933049	0.0571905	-0.101858	-0.0704259	-0.0295747	-0.0216299	-0.116503	-0.00943807	-0.0516278	0.00924025	-0.0458247	-0.133814	-0.0656498	-0.090504	-0.0638068	0.115692	-0.107199	-0.181516	-0.0988768	0.00429522	-0.111447	-0.0689468	-0.0355178	0.0691827	-0.148751	-0.149548	-0.193146	-0.119324	0.0302637	-0.0192588
DAI_mediated_induction_of_type_I_IFNs	0.133657	0.268012	0.40728	0.265297	-0.125351	-0.127353	-0.113584	-0.145958	-0.12691	-0.140412	-0.139542	-0.135537	0.22028	-0.143928	-0.150197	-0.146313	-0.147965	-0.132309	0.394864	-0.12397	0.200231	-0.129045	-0.140802	-0.156526	-0.137646	-0.133616	-0.139835	-0.139185	-0.183212	-0.155922	-0.139692	-0.13259	-0.108741	-0.14286	-0.19668	-0.129936	-0.108654	-0.127657	-0.141765	-0.141248	-0.165946	0.369987	0.324059	-0.138487	-0.128757	-0.114808	-0.124102	-0.215981	-0.150675
IRF3_mediated_activation_of_type_1_IFN	0.133657	0.215747	0.270462	0.208471	0.0562529	-0.113651	0.0616288	-0.132602	0.0589222	0.104347	-0.01405	-0.121798	0.304657	-0.0323999	0.0319315	0.0346674	-0.135691	0.104359	0.349516	-0.111234	0.2393	0.0455982	-0.128471	-0.144325	0.03855	0.0491066	0.103096	0.0411805	-0.0158827	0.077821	-0.126569	0.0643144	-0.187561	-0.230369	-0.185986	0.0478044	-0.102608	-0.123497	-0.141457	0.0925017	0.0798707	0.227966	0.263766	0.0474354	-0.114781	0.0576947	-0.108815	-0.207395	-0.030181
CREB_phosphorylation_through_the_activation_of_CaMKII	0.133657	0.0418464	-0.058934	0.0330058	0.0426089	0.0718953	-0.00921619	0.024958	0.0380915	-0.0683087	-0.0656992	0.112277	0.0262512	0.0391587	0.116614	-0.166476	-0.0389364	-0.0137282	0.0839182	0.0426502	0.0817732	0.0970239	0.0219748	0.0846925	0.00642762	-0.0461145	0.146202	-0.127366	-0.0677629	0.0904371	0.0539581	-0.0633656	-0.0408491	-0.0446587	0.00977293	0.0626553	-0.0777189	0.119065	0.137021	-0.0162746	0.13916	0.0314759	0.0391808	0.102014	-0.00359961	-0.0449733	0.0282712	0.110676	-0.0313735
CREB_phosphorylation_through_the_activation_of_CaMKK	0.133657	0.000402869	-0.276302	-0.289167	-0.275678	-0.201251	-0.139007	-0.17082	-0.151042	-0.0176523	-0.143139	-0.205634	-0.140814	0.0234596	0.0697251	-0.292675	-0.297528	-0.288968	-0.133943	-0.267188	-0.231619	-0.263421	-0.159609	0.0425826	-0.198408	-0.209404	-0.206132	-0.308135	-0.315047	-0.0405437	-0.163338	-0.021109	-0.282451	-0.226719	-0.126442	-0.14682	-0.295374	0.0339804	-0.00833148	-0.0305135	0.0535587	-0.0571179	-0.0784332	-0.287096	-0.270898	-0.278275	0.0900175	-0.0251686	-0.28583
NF-kB_activation_through_FADD/RIP-1_pathway_mediated_by_caspase-8_and_-10	0.133657	-0.112468	-0.0190954	-0.144578	0.265394	-0.0532731	0.00387994	0.158055	-0.103456	0.0962248	-0.00643671	0.132916	0.267131	-0.0904127	-0.119599	0.0500337	0.00577522	-0.139687	0.105818	-0.145897	-0.0730508	-0.115499	-0.118453	-0.0441459	-0.00800834	0.236152	0.158945	0.0448482	-0.0872458	0.0819268	0.000403116	0.238753	-0.105558	0.101268	-0.188108	-0.103792	-0.0242979	0.0697883	0.0243563	0.248874	-0.156178	-0.0133835	-0.0886209	0.271343	0.135947	-0.0105564	0.166043	0.115989	0.0859277
TRAF6_mediated_IRF7_activation	0.133657	0.029228	0.0100912	-0.0387552	0.117565	-0.00514251	0.029552	0.164439	0.0312121	0.0351237	-0.017979	0.0777613	0.169241	0.0514713	0.0540244	0.0575593	0.0609209	0.0866614	0.167558	-0.0251815	0.026425	0.00992367	0.0522775	0.0441191	0.050926	0.153808	0.0490878	0.0819664	0.132147	0.00596159	0.063388	0.127622	-0.0397756	0.098178	0.0429147	0.0411145	-0.0159969	0.0661991	0.00460307	0.151644	-0.0369923	0.0689105	0.0452819	0.112374	0.0965245	0.0123356	0.0843048	0.0340019	0.0447778
TRAF6_mediated_NF-kB_activation	0.133657	0.0421966	0.144415	0.0990271	0.123714	0.0249414	0.0619486	0.138694	0.00848019	0.0645408	0.00886916	0.067489	0.100841	0.0681906	0.0294375	0.0876612	0.0459996	0.0747789	0.100283	-0.0325368	0.0382383	0.0898853	-0.0257403	0.0643016	0.0945537	0.0897608	0.0658543	0.0768872	0.0765342	0.0768141	0.0849198	0.120641	-0.0757834	0.0403904	0.035319	0.0609179	0.00300633	0.00556441	-0.00837058	0.143075	-0.0397557	0.157723	0.0492478	0.0920932	0.1733	0.108186	0.0405453	0.103261	0.0550405
Negative_regulators_of_RIG-I/MDA5_signaling	0.133657	0.0568817	0.067405	0.0211855	0.157655	0.0460494	0.128902	0.120952	0.0655849	0.0652749	-0.0129327	0.0693229	0.256719	0.0593842	0.000383679	0.0827643	0.0357505	0.0858651	0.171777	-0.0936023	0.0586561	-0.0471125	-0.0180894	0.0229969	0.11059	0.235692	0.0913797	-0.0137361	0.0689319	0.103473	0.0628762	0.203677	-0.144027	0.0433672	0.0108081	-0.0239439	0.0507158	0.0925937	0.00573094	0.172462	0.00698125	0.123284	0.0666435	0.193834	0.110033	-0.00920122	0.0704002	0.146604	0.0467517
Unblocking_of_NMDA_receptor__glutamate_binding_and_activation	0.133657	-0.00628784	-0.00608569	-0.000742606	0.018169	0.0589122	0.00604257	0.0306011	0.0259665	-0.151209	-0.109899	0.0784331	0.0197136	-0.05494	0.0588722	-0.127502	0.000261098	-0.0227551	0.0720281	0.0590206	0.0540299	0.0870407	0.026994	0.036011	0.0177791	-0.0872743	0.107438	-0.0961924	-0.0653741	0.105355	-0.0052216	-0.0774009	-0.041204	0.0314591	0.0129961	0.0612559	-0.09985	0.0871906	0.0509231	-0.0153318	0.0727376	-0.0593335	0.0147071	0.0529988	0.00538636	-0.0679136	-0.0106475	0.0351364	0.0237975
Beta_defensins	0.133657	0.203431	0.178488	0.17521	0.165297	0.165777	0.183931	0.150916	0.174121	0.203861	0.153833	0.17384	0.225624	0.166267	0.123904	0.166009	0.170175	0.189148	0.173856	0.211469	0.141642	0.210884	0.155148	0.134496	0.173405	0.144425	0.150126	0.120803	0.166562	0.161387	0.152606	0.204839	0.183032	0.14449	0.164242	0.165171	0.186046	0.185567	0.131082	0.20062	0.133122	0.162441	0.125799	0.155943	0.14996	0.17893	0.17331	0.140923	0.148015
Cyclin_A_Cdk2-associated_events_at_S_phase_entry	0.133657	0.0103257	-0.0239884	-0.0880849	-0.0188267	0.011191	-0.00107171	-0.100427	-0.10984	-0.0352205	-0.0310485	-0.0696506	-0.108901	0.110844	-0.120352	-0.156053	-0.0400307	0.0624671	-0.193163	-0.0192106	-0.0505898	0.0134139	0.0105443	0.0106768	0.0468486	-0.0943954	-0.100052	-0.0224302	-0.0501378	-0.0773963	-0.0336235	0.0905345	-0.0171947	0.0433437	-0.0500699	-0.130214	-0.0430268	0.0445869	-0.0495148	-0.0412749	-0.00306475	0.0246443	-0.0581111	-0.179548	-0.00841785	-0.211917	0.018589	-0.134884	-0.106199
Inhibition_of_replication_initiation_of_damaged_DNA_by_RB1/E2F1	0.133657	0.180003	0.00524077	-0.0296369	-0.0582963	-0.0313321	-0.0516044	-0.061615	-0.0618151	0.110514	-0.0440371	-0.000420785	-0.102434	0.197949	-0.0140995	0.076503	-0.101681	0.139064	-0.0962467	-0.0589915	-0.172934	0.0380643	-0.0665555	-0.0808492	0.000680053	-0.0201445	0.095756	0.0610108	-0.0797104	0.0208408	-0.124679	0.140878	0.0528039	-0.123275	-0.149187	-0.0556293	0.0291177	-0.0998312	0.0876717	0.0210846	-0.102804	0.0163866	-0.162254	-0.122657	-0.0598163	-0.0325024	-0.113778	-0.217969	0.0253949
E2F-enabled_inhibition_of_pre-replication_complex_formation	0.133657	-0.019151	-0.0101329	-0.013878	-0.0297949	-0.0221141	-0.00600583	-0.0421385	-0.0212382	0.288324	-0.0325537	-0.0321692	-0.0604491	0.117224	-0.0499702	-0.0489008	-0.0497698	0.202474	-0.0305275	-0.0252386	-0.0895542	-0.0334486	-0.0371802	-0.0544197	-0.0424374	-0.0334788	-0.0469697	0.0387759	-0.00513307	-0.0631446	-0.0403941	0.229146	-0.0134803	0.0417228	-0.109591	-0.0278057	0.0774409	-0.047765	0.00636168	-0.0465115	-0.0682658	-0.0886192	-0.1165	-0.0348616	-0.0226615	-0.012593	-0.018673	-0.138366	-0.0523124
Activation_of_the_pre-replicative_complex	0.133657	0.0937316	-0.0946507	-0.0811127	-0.0182509	-0.0543222	-0.0906007	-0.0535612	-0.077811	0.149859	-0.0104103	-0.0499635	-0.112219	0.214359	-0.0530001	-0.07827	-0.119155	0.00654963	-0.05803	-0.0845188	-0.136551	-0.0594854	-0.0678372	-0.104044	0.0508912	-0.0114253	0.0116023	0.0461494	-0.00802293	-0.0206637	-0.0443733	0.132964	0.0209191	-0.0127258	-0.180455	-0.04324	0.0406124	-0.0348915	0.120568	-0.0308892	-0.111191	-0.111239	-0.17691	-0.07228	-0.0187443	-0.027741	-0.061175	-0.205982	-0.065463
E2F_mediated_regulation_of_DNA_replication	0.133657	0.0169967	-0.234565	-0.227484	-0.188956	-0.14463	-0.195712	-0.168069	-0.14807	0.108565	-0.153132	-0.184379	-0.263065	0.323687	-0.127852	-0.265901	-0.123783	-0.00672404	-0.125284	-0.159702	-0.228591	-0.193605	-0.121607	-0.127284	0.0252108	-0.157457	0.180251	-0.0302286	-0.0643879	-0.0765199	-0.220441	0.193074	-0.0972524	-0.0989227	-0.195547	-0.247622	-0.218914	-0.0775976	0.208172	-0.18023	-0.202921	-0.354938	-0.232948	-0.153252	-0.098358	-0.17206	-0.0390486	-0.25868	-0.211643
G1/S-Specific_Transcription	0.133657	0.0169967	-0.234565	-0.227484	-0.188956	-0.14463	-0.195712	-0.168069	-0.14807	0.108565	-0.153132	-0.184379	-0.263065	0.323687	-0.127852	-0.265901	-0.123783	-0.00672404	-0.125284	-0.159702	-0.228591	-0.193605	-0.121607	-0.127284	0.0252108	-0.157457	0.180251	-0.0302286	-0.0643879	-0.0765199	-0.220441	0.193074	-0.0972524	-0.0989227	-0.195547	-0.247622	-0.218914	-0.0775976	0.208172	-0.18023	-0.202921	-0.354938	-0.232948	-0.153252	-0.098358	-0.17206	-0.0390486	-0.25868	-0.211643
SCF(Skp2)-mediated_degradation_of_p27/p21	0.133657	0.199982	0.208944	0.165903	0.185063	0.182955	0.252137	0.128137	0.185731	0.102431	0.151781	0.111049	0.19149	0.224796	0.148223	0.182016	0.129171	0.121696	0.118209	0.126098	0.0896798	0.177715	0.13583	0.128499	0.2726	0.194781	0.230501	0.158089	0.169891	0.163339	0.120838	0.194005	0.0953846	0.100907	0.0744705	0.136026	0.1643	0.104333	0.157826	0.1035	0.141784	0.165849	0.0771282	0.0933747	0.125082	0.160458	0.195879	0.0232967	0.154041
Phosphorylation_of_proteins_involved_in_G1/S_transition_by_active_Cyclin_E_Cdk2_complexes	0.133657	-0.0632377	-0.148042	-0.140966	-0.161297	-0.159373	-0.133979	-0.0290016	-0.154348	-0.170375	-0.175089	-0.166339	-0.192947	0.000858228	-0.0292347	-0.174903	-0.178857	0.0286085	-0.016146	-0.158767	-0.201298	-0.160572	-0.0242014	-0.180049	0.221503	-0.169914	-0.0561506	0.0907745	0.0505584	-0.0454114	-0.0299543	-0.156566	-0.0468118	-0.188543	-0.215771	-0.155622	-0.00137059	-0.0352005	0.0433796	-0.0560442	-0.202687	-0.204766	-0.22845	-0.166523	-0.165774	-0.140622	-0.144624	-0.252526	-0.179522
alternative_complement_pathway	0.133657	0.355699	0.270839	0.276122	0.357125	0.354574	0.362539	0.342614	0.35626	0.210245	0.344899	0.350641	0.33238	0.328747	0.334556	0.337828	0.332266	0.215247	0.348636	0.353271	0.256744	0.222098	0.258583	0.326465	0.344746	0.230688	0.209388	0.283232	0.305732	0.320399	0.346738	0.347594	0.359886	0.330154	0.27558	0.273418	0.288329	0.290415	0.28639	0.208975	0.325481	0.241842	0.266316	0.352031	0.270551	0.281314	0.355142	0.265213	0.324785
roles_of___arrestin_dependent_recruitment_of_src_kinases_in_gpcr_signaling	0.133657	0.0152994	0.0615338	0.0575972	0.00287027	0.0529501	0.0460708	0.0276401	0.0316994	-0.00783653	0.0395883	0.0637173	0.0700014	0.00129389	0.0721609	0.0379325	0.0516395	-0.050688	0.0160884	0.0255735	0.0628402	0.0471927	0.0402657	0.0968321	0.0389609	0.0558297	0.0607491	0.0536787	0.092876	0.0690422	0.0170487	0.00724062	0.0603937	0.0282033	0.108207	0.0894872	0.034441	0.00704243	0.0448599	-0.0296281	0.0890917	0.158983	0.193988	0.032778	0.0413734	0.0270375	0.0405855	0.119551	0.131088
ErbB2/ErbB3_signaling_events	0.133657	0.00299483	0.0137122	-0.00777121	0.0313949	0.0915459	-0.000848921	0.0148981	-0.0127942	0.00413742	-0.0230996	0.0499759	0.00811059	0.0809858	0.0672441	0.0489883	0.0488059	0.0216876	0.00319298	0.069551	0.0798451	0.0237321	0.0419272	0.0354848	0.0328874	0.0859322	0.0553833	0.145302	0.0452343	0.0346439	0.0499118	0.0277577	0.115794	0.0568183	0.080703	-0.0320529	0.0479861	0.105912	0.0682122	0.0329664	0.0218207	0.00942017	0.0423489	0.0616491	0.0245286	0.00206765	0.0503564	0.0125921	0.0135447
IL3-mediated_signaling_events	0.133657	-0.0704737	-0.0150074	0.0351894	0.000198664	0.0655138	0.00129169	0.0327646	0.0661119	-0.00788061	-0.0269641	-0.0141093	0.0173095	0.0143142	0.0106177	0.0165869	0.0260558	0.00331343	0.0607602	-0.0168816	0.08018	0.0213035	0.0240372	0.0409729	-0.0169289	0.02872	-0.00469948	-0.0230747	-0.0329785	0.0421702	-0.00280902	0.00122694	0.033795	-0.0341104	0.173436	0.0020428	-0.0246427	0.0340474	-0.041059	-0.0193412	0.0261265	0.0453313	0.117557	0.0523368	0.0150653	-0.00934606	-0.0160163	0.0820291	0.0380437
TNF_receptor_signaling_pathway	0.133657	-0.0576546	0.0154491	-0.00195791	0.049971	-0.0106575	0.011278	0.108296	0.0328202	0.00923094	0.0418972	0.00351575	0.0187015	0.0020641	0.0105633	0.0379773	0.0238503	0.00889929	0.0211897	0.00338585	-0.0051509	0.0525044	0.0220956	-0.0161996	0.0758887	0.0914703	0.0250602	0.0557201	0.0477269	0.0284178	0.0306468	0.0659561	0.0253585	0.0199706	0.0366985	0.0594278	0.0198797	0.000722895	-0.00286886	0.0594622	-0.0417036	0.0808102	0.0265413	0.0279075	0.0441803	-0.000379825	0.0463414	0.0528027	0.0289188
EGFR_Transactivation_by_Gastrin	0.133657	0.135109	-0.0606105	0.0659499	0.0984793	0.01412	0.0579975	0.068525	-0.00192307	0.0041196	-0.023891	0.0700864	-0.0859634	0.0372736	0.120535	0.0671219	0.0551193	-0.00426804	0.0617312	0.0115437	0.1651	-0.0591773	0.167619	0.0927523	0.0430194	0.0869432	0.0757027	0.187899	0.132776	0.0400069	0.00992793	0.0258983	0.149184	0.124628	0.137548	-0.0220512	0.139483	0.141719	0.10369	0.0776801	-0.104308	-0.019022	0.0522905	0.0432938	-0.0206791	0.00444886	0.115186	0.0662427	-0.0426797
Adenylate_cyclase_activating_pathway	0.133657	-0.149186	-0.0981924	-0.104953	-0.136635	-0.15721	0.0348295	0.102542	0.0815479	-0.21388	0.198026	0.00138853	0.0381522	-0.216619	-0.0407341	-0.0445152	0.15606	-0.116519	0.0750463	-0.119362	-0.144033	-0.233425	0.15852	0.000268597	-0.159323	0.0240565	0.184628	0.00164145	0.132038	-0.150016	0.120798	-0.102384	-0.0682467	-0.0857615	0.103388	0.0893975	-0.131785	-0.0534678	-0.0720328	-0.208796	-0.0250631	-0.0387355	-0.116731	0.0971977	-0.0982365	-0.284759	0.0446441	0.17814	0.0810679
Adenylate_cyclase_inhibitory_pathway	0.133657	-0.0998244	-0.0456313	0.0218419	-0.111018	-0.114204	-0.00690469	0.0973846	0.0903338	-0.158203	0.10406	-0.00250459	0.0360493	-0.0993955	-0.0397546	0.0179392	0.10875	-0.0249826	0.0138063	-0.0249993	-0.0244799	-0.0842713	0.0701448	0.0794904	-0.0563624	0.101076	0.233793	0.0561287	0.187626	-0.0445888	0.163416	-0.0177464	-0.04872	0.0551578	0.123722	0.118202	-0.0950347	0.0024155	-0.127558	-0.0713512	0.0585747	0.053207	-0.0815454	0.0968209	0.0232232	-0.192438	0.064636	0.150536	0.0792315
DARPP-32_events	0.133657	-0.00452535	8.74e-05	-0.0223234	-0.0780691	0.0291082	-0.00251827	-0.0673097	-0.0154639	0.0298398	-0.0938788	0.00100588	-0.0542672	0.0359208	0.077983	0.0225211	0.0118709	0.0500097	-0.0337784	-0.0227758	-0.0113473	-0.000991257	-0.00159676	0.0321778	-0.0306865	-0.0608601	-0.0138314	0.0386778	-0.0581735	0.133346	0.0217184	-0.0366746	0.0686143	-0.0403377	-0.0438267	-0.0542676	-0.016349	0.0577191	-0.00316283	0.0512502	0.0226577	0.0558193	-0.0663619	0.0109123	-0.0416294	0.0187606	0.0389314	-0.116876	-0.0364217
Gastrin-CREB_signalling_pathway_via_PKC_and_MAPK	0.133657	-0.149922	-0.261073	-0.266636	-0.260317	-0.222645	-0.175855	-0.0545493	-0.133977	-0.0714082	-0.180347	-0.222553	-0.135899	-0.0863079	-0.185231	-0.237317	-0.0701153	-0.166016	-0.131409	-0.237434	-0.149248	-0.0111235	-0.0774953	-0.0312198	-0.150729	-0.0856125	-0.237076	0.0016231	-0.240051	0.0238046	-0.210194	-0.204852	-0.0544386	-0.174983	-0.0165832	-0.114586	-0.268382	-0.1706	-0.261603	-0.109556	-0.207074	-0.192132	-0.0840338	-0.271106	-0.259012	-0.16706	-0.193172	-0.0606619	-0.274569
PLC_beta_mediated_events	0.133657	0.0459659	-0.0355651	-0.0447512	-0.0385879	0.0453087	0.0597142	0.0759165	0.0521221	-0.0399818	0.0783071	-0.00753838	-0.0427481	0.112517	0.0349808	-0.0299471	-0.0367405	0.0263372	-0.00757835	0.0247989	-0.0129388	0.0397431	-0.0146602	0.0154967	0.128668	0.0896866	0.104556	0.109228	0.196906	0.0366267	0.117769	0.102029	-0.0403195	0.119115	0.162006	0.0402835	-0.00839963	0.0466311	-0.0717503	0.00971367	0.124764	0.067291	0.063327	0.0616157	-0.00820379	0.00128286	0.100054	0.0832627	0.0367581
phospho-PLA2_pathway	0.133657	-0.240854	-0.235559	-0.24924	-0.258699	-0.272647	-0.229524	-0.0790844	-0.274929	-0.274751	-0.23046	-0.255648	-0.276829	-0.281525	-0.236352	-0.225336	-0.00775131	-0.287199	-0.0658134	-0.247795	-0.257383	-0.253959	-0.209201	0.0612727	-0.261766	0.0607748	-0.266469	0.0592232	-0.255807	-0.101315	-0.276132	-0.257285	-0.0345238	-0.212955	-0.031224	-0.25673	-0.255686	-0.282182	-0.249099	-0.248027	-0.255724	-0.2944	0.000354909	-0.283705	-0.260909	-0.234744	-0.258585	0.0361597	-0.267922
il_6_signaling_pathway	0.133657	0.0735453	-0.0337506	-0.0617583	-0.0244467	0.0135006	0.00189559	-0.0177525	-0.0389808	-0.0294084	-0.00222974	0.0216587	-0.0448884	-0.0195085	-0.0158991	-0.0283785	-0.0319689	-0.0101633	0.00789597	0.0085226	0.0968284	-0.0492519	0.0127664	0.0508676	0.0244093	-0.00795251	-0.00372431	0.0490054	0.0282766	-0.023161	0.0104976	-0.0624672	0.0243892	0.0170771	0.185313	-0.0441603	0.0162425	-0.00664757	-0.0161993	-0.0346387	-0.0522989	0.0447177	0.130431	0.0377581	0.0497089	-0.0190412	0.00366062	0.0954204	-0.00423595
Validated_transcriptional_targets_of_TAp63_isoforms	0.133657	-0.00867628	0.0250197	-0.0334442	-0.0170737	-0.0134502	-0.0028316	0.0107728	0.00432922	-0.0279461	0.000580702	0.0315954	0.0297662	-0.00415583	-0.0584617	-0.0306851	0.0209372	-0.0493326	-0.0293555	-0.00325375	0.000244626	-0.0473523	-0.0208243	-0.00192277	0.0146587	-0.0500922	-0.00691616	-0.0422248	0.000408596	-0.0148687	0.0110253	-0.0183489	-0.0493273	0.0135834	0.0243316	-0.0821382	-0.0220159	-0.0439547	-0.0283444	-0.0189786	-0.0271316	-0.0105588	-0.0040597	-0.0271439	-0.00930877	-0.0815156	0.00483294	0.0169448	-0.0755387
IL2_signaling_events_mediated_by_STAT5	0.133657	-0.0715288	0.00582908	-0.0544097	-0.0600736	0.0267486	-0.0821606	-0.00249175	-0.0231986	0.0103967	0.0380481	0.0170671	0.0791554	0.00868646	-0.0210378	-0.0742571	-0.0277219	-0.00138758	0.0396761	-0.025675	0.082606	-0.0734432	0.0171953	0.0404163	-0.0927489	-0.0244789	-0.00548955	-0.0568909	0.0850255	-0.080592	-0.0372332	-0.009014	-0.0384831	-0.00234215	0.108141	-0.0789174	-0.0318312	0.00950628	-0.10186	0.0112369	0.00623265	0.0560735	0.145617	0.0342576	-0.0197827	-0.108096	0.0408356	0.040233	0.0680974
ahr_signal_transduction_pathway	0.133657	-0.042616	-0.0849978	0.0593635	0.00611579	0.193039	0.143852	0.0408457	0.0166382	0.0821192	0.0527895	0.0127267	-0.17489	-0.129848	0.196078	-0.0859395	-0.0177488	-0.0568637	0.00955293	-0.0442201	-0.148608	0.00338945	0.132641	0.231401	-0.000889639	0.165105	-0.0502573	0.103132	-0.0913877	0.0307681	0.0471411	0.0483317	-0.0878332	-0.0702819	-0.00521261	0.138206	-0.0790136	-0.00728539	-0.0140583	0.0810359	-0.0335258	-0.115647	0.00997933	0.13836	0.0190529	0.0715715	-0.0338533	-0.0917125	0.0344465
cystic_fibrosis_transmembrane_conductance_regulator_(cftr)_and_beta_2_adrenergic_receptor_(b2ar)_pathway	0.133657	0.0253124	0.0871978	0.0819259	0.0532497	0.1072	0.047909	0.0734023	0.0811884	0.0585208	0.125749	0.108621	0.0127733	0.0390397	0.11379	0.0465774	0.132913	0.0768479	0.0993002	0.0589935	0.151093	0.0825012	0.068217	0.107743	0.0633698	0.0237093	0.0938467	0.115604	0.161728	0.171981	0.13239	0.062402	0.127523	0.0832489	0.172398	0.104092	0.191909	0.124492	0.0908815	0.0539571	0.101538	0.12284	0.135606	0.147827	0.116973	0.0117906	0.0690499	0.110033	0.111023
tumor_suppressor_arf_inhibits_ribosomal_biogenesis	0.133657	0.0378072	0.0553106	0.0702934	0.107763	0.0590977	0.0849843	0.0762181	0.0786713	0.109616	0.0897	0.067536	0.0574277	0.0522187	0.111402	0.0720132	0.00488276	0.0916187	0.089132	0.0382214	0.0123214	0.0749996	0.107471	0.0308669	0.0840911	0.137503	0.0708614	0.0466664	0.0374918	0.092225	0.0669482	0.0639875	0.0456589	0.0942165	0.0336852	0.0778088	0.138398	0.0819426	0.0640473	0.108833	0.0654904	-0.0179391	-0.015588	0.107005	0.126742	0.0920795	0.0957375	0.0207206	0.0707545
IFN-gamma_pathway	0.133657	-0.00262215	-0.0100913	-0.022033	0.00982167	-0.0155024	-0.0825981	0.00369189	0.0169979	-0.0469738	-0.0509452	-0.0308788	0.032236	0.00924785	-0.0227833	0.0352477	0.0347834	-0.00257413	-0.0123274	-0.00730857	0.0385979	-0.0215356	-0.0271228	0.0288733	0.0201214	-0.000164998	-0.013041	-0.0178637	0.00896873	0.0298345	-0.0165768	0.00600172	0.0166967	-0.0556809	0.173755	-0.0378812	-0.010997	0.0302394	-0.0737527	-0.0117658	0.00332697	0.0790134	0.0821116	0.0788013	-0.0271263	-0.0744961	0.0079431	0.137224	-0.0306649
TRAF6_mediated_IRF7_activation_in_TLR7/8_or_9_signaling	0.133657	-0.0426632	-0.00576978	-0.0805396	0.0211003	-0.0512184	-0.0487519	0.0493708	0.0240427	-0.106893	-0.0703746	0.0323016	0.0271895	-0.0503454	0.0149848	-0.0255736	0.0119544	-0.0294126	0.052021	-0.147331	0.0188931	-0.0423559	0.0131366	-0.0370219	0.0496303	0.0447529	-0.0386927	0.172867	0.0623022	0.0640917	-0.0461697	-0.0110431	-0.134592	0.0280551	0.0892274	0.0886713	-0.01976	-0.0126758	-0.028266	0.0278881	-0.16922	0.105137	0.138523	-0.0161644	-0.0719237	-0.0564533	0.0387165	0.159341	0.0867194
sumoylation_by_ranbp2_regulates_transcriptional_repression	0.133657	-0.0831411	-0.0163898	-0.0503869	-0.0535818	-0.0412348	-0.059572	-0.0128115	-0.0425652	0.0396987	-0.0483957	-0.0168937	0.028254	-0.0673907	-0.0513988	-0.0195553	-0.0748097	-0.05709	-0.00361239	-0.0188057	-0.0428506	-0.0489337	0.0656584	0.0326642	0.0222172	-0.0704811	-0.0119341	0.0430518	-0.0518335	-0.0445663	-0.00902491	0.0536965	-0.0536538	-0.0572491	0.0102033	-0.0390869	-0.00232069	0.0216684	-0.0790211	0.0287261	-0.0572824	-0.0719111	-0.0615085	0.0442968	-0.0165078	-0.0427863	0.0394156	-0.0175452	-0.0735842
platelet_amyloid_precursor_protein_pathway	0.133657	-0.0237875	0.0117206	0.0480762	0.0759239	-0.039743	0.0211748	0.116005	0.0102658	-0.12118	-0.0282826	-0.0122771	-0.0488646	0.0853656	-0.0938416	0.0618507	0.117104	0.00916387	-0.0114054	0.0958991	0.0958425	0.0309611	0.0223216	0.0179362	0.0474456	-0.0776325	-0.0770957	0.086476	0.0638812	0.203371	-0.0273054	-0.0876041	-0.00864655	0.0280676	0.0786451	0.0895411	-0.00682292	0.00294071	-0.0348591	0.0444044	0.0706073	0.0577396	0.0170714	-0.0376642	-0.0190988	-0.0143742	0.0508293	0.09245	0.00353496
EPHA2_forward_signaling	0.133657	0.0882992	0.143893	0.090863	0.122111	0.132043	0.114143	0.103467	0.110716	0.0964293	0.103488	0.183265	0.0822016	0.100107	0.140973	0.140139	0.147451	0.101047	0.123616	0.128537	0.0795515	0.10447	0.119111	0.134084	0.130433	0.108528	0.111662	0.18065	0.112779	0.166599	0.102985	0.10006	0.136322	0.176315	0.048019	0.127446	0.12445	0.114622	0.100414	0.107993	0.107226	0.0570782	0.0958008	0.126162	0.120143	0.0993077	0.150079	0.101228	0.0956518
Toll_Like_Receptor_9_(TLR9)_Cascade	0.133657	-0.325313	-0.3158	-0.356019	-0.386344	-0.121981	-0.342173	-0.0201732	-0.134686	-0.0190673	-0.285993	0.273572	-0.205584	-0.347698	-0.103041	-0.340091	-0.19785	-0.0203968	-0.0816046	0.0405265	-0.096168	-0.252892	-0.0207134	-0.0285661	0.138501	-0.0624091	-0.0856877	0.19682	-0.268938	0.0758864	0.0322202	-0.185467	-0.239479	-0.0549009	-0.0395291	0.0313923	-0.12641	-0.0116507	-0.00406911	0.0560704	-0.126448	0.109973	0.0737687	-0.00269088	-0.0807042	-0.25404	-0.0209261	0.0592447	-0.342501
mechanism_of_protein_import_into_the_nucleus	0.133657	-0.0385527	-0.0313374	0.0256969	0.0297052	0.00532984	0.0174061	-0.0126194	-0.0136345	0.0659522	0.0216488	0.0334336	-0.00393812	0.0204665	-0.030988	0.065923	-0.0274186	0.0384557	0.0136316	-0.0223013	-0.0964865	0.0243872	-0.00644698	0.0029044	0.0428885	0.00216939	-0.0161317	0.125875	0.00253843	-0.00249321	-0.017602	0.137437	0.0561669	-0.0155255	-0.112323	0.0349677	0.0736191	-0.0458905	0.0193966	0.0105834	-0.0758228	-0.0550258	-0.151621	-0.0305663	0.0340847	0.00426862	-0.0276428	-0.12755	0.00755965
Signaling_events_mediated_by_HDAC_Class_III	0.133657	0.0553276	0.0569569	0.0376166	0.0761831	0.0725549	0.0938952	0.135422	0.0794432	0.124791	0.0785775	0.0412296	0.126994	0.070283	0.133646	0.03539	0.0347372	0.139186	0.102006	0.089665	0.0839581	0.0689239	0.107586	0.104932	0.0429891	0.0699776	0.069717	0.0476753	0.0283943	0.0586468	0.0981583	0.0849851	0.130664	0.161932	0.0924188	0.0532405	0.0988659	0.0794941	-0.0140799	0.0729319	-0.00655276	0.017261	0.0233982	0.0735876	0.139172	0.0541416	0.0967482	0.0243172	0.105267
Regulation_of_Androgen_receptor_activity	0.133657	-0.0146388	0.0940261	0.0651742	0.0435117	0.0553959	0.0393335	0.130106	0.112897	0.0651089	0.108117	0.0416781	0.106979	0.00242612	0.113261	0.014854	0.044498	0.106598	0.101336	0.0115007	0.0424344	-0.0150003	0.100764	0.101004	0.0479802	0.0813483	0.0792964	0.064353	0.0226432	0.0661428	0.0776857	0.067593	0.145259	0.0905637	0.0982552	0.0705273	0.0871024	0.0605193	0.0219376	0.0834893	-0.0194182	-0.0242387	0.0346292	0.105314	0.0815388	0.0274831	0.0808288	0.0205452	0.137388
cd40l_signaling_pathway	0.133657	0.00896572	0.190215	-0.045278	-0.0578018	-0.0489292	-0.0581384	0.0389543	0.0140954	-0.0259525	-0.054228	-0.0206026	0.00607398	0.0413606	-0.0965456	-0.102188	-0.104368	-0.0437134	0.103381	-0.0691795	0.192105	-0.0339733	-0.0216812	-0.0840499	0.0250227	0.0718532	-0.0173892	-0.0441195	0.203755	0.0261319	0.0333667	0.0635647	-0.00486655	0.0273157	0.227955	0.0293018	-0.0498027	-0.0517413	-0.0266868	-0.00916138	-0.063885	0.172814	0.230591	-0.0147075	-0.020885	-0.148667	0.0136122	0.131468	0.155922
fas_signaling_pathway_(cd95)	0.133657	-0.0581462	0.0440605	-0.0859997	0.0732993	-0.0650299	-0.0653246	0.000608112	-0.0847465	0.0830632	0.00515073	-0.0241789	0.128018	0.0805098	-0.0562135	0.0893435	0.0677023	0.0285121	-0.0193444	0.0584894	0.103426	-0.0285001	-0.0922414	-0.00923263	0.096474	0.0410956	0.169335	0.130938	0.0791665	0.0483596	0.0495359	0.137543	0.051506	0.0643781	-0.0719668	-0.062679	-0.0344472	0.0122661	-0.0172995	0.0861207	0.0285512	-0.0308428	-0.0591534	-0.0200348	0.0156326	-0.0209814	0.146611	-0.0117972	0.0621884
Regulation_of_RhoA_activity	0.133657	-0.0138593	-0.0122063	-0.0271654	-0.00852963	-0.0568224	-0.0509058	-0.0339836	-0.0371194	0.0201506	-0.0297913	-0.0102691	0.0213909	-0.0876788	-0.046941	-0.0830372	-0.0503513	-0.00308563	-0.0221412	-0.0323844	-0.0183117	0.00255329	-0.0138615	-0.0784774	-0.0387765	-0.0868926	-0.115059	-0.0734539	0.00483395	-0.0275407	-0.00948154	-0.0539377	-0.0166689	-0.00388405	-0.00715078	0.00110762	-0.0780887	0.0164236	0.049515	0.0607964	-0.057704	0.060998	-0.0453889	-0.0297603	-0.0199292	-0.052693	-0.115117	0.0296496	-0.0396894
RAC1_signaling_pathway	0.133657	0.0120934	0.0471207	0.000240235	0.00834363	0.0197226	0.0542463	-0.0228634	0.0313326	0.0195611	-0.00985716	0.00302982	0.0348296	0.0214132	0.0342927	0.0632126	0.0457946	0.0444323	-0.00306655	-0.00976453	0.0459724	-0.00106013	-0.0264084	-0.000547261	-0.00435963	-0.0221388	0.0198552	0.0714362	-0.0003987	0.0350559	-0.0151556	0.0182963	0.0594413	0.0187266	0.02954	0.011878	-0.0373742	-0.0148795	-0.00762965	0.0350257	0.000691866	0.037101	0.053546	0.00736127	-0.0248767	0.023556	0.000899628	0.0425572	0.0202834
Insulin_Pathway	0.133657	0.0650539	0.0277058	0.0513765	0.051188	0.0580227	0.049128	0.0237972	0.0276292	0.0313467	0.0299887	0.0790507	0.0530078	0.0304543	0.0283058	0.020846	0.0671895	0.0519215	0.0468331	0.101655	0.0720135	0.0444964	0.0672683	0.0240223	0.0082751	0.058953	0.0284151	0.120423	0.0283591	0.0572457	0.0452827	0.0361281	0.122211	0.0671	0.0368657	0.0158404	0.0445421	0.0771254	0.075073	0.00545843	-0.0113452	-0.0259983	-0.00259842	0.0730302	0.0685952	0.0368097	0.0703082	-0.0217172	0.00290613
Validated_targets_of_C-MYC_transcriptional_repression	0.133657	0.0645558	0.0906351	0.0773447	0.102397	0.106579	0.0735541	0.147777	0.0642415	0.112865	0.0926914	0.0577571	0.141175	0.13415	0.0924487	0.0728752	0.119585	0.138804	0.120359	0.102422	0.0811353	0.0785058	0.102695	0.104039	0.13873	0.14456	0.0869814	0.0957843	0.108661	0.131334	0.148363	0.0389163	0.0809826	0.0932986	0.0791535	0.0523387	0.12127	0.0871042	0.0714519	0.119801	0.128819	0.0984586	0.0972633	0.137251	0.089054	0.079618	0.132462	0.133524	0.123441
Recycling_of_bile_acids_and_salts	0.133657	0.363715	0.227025	0.364207	0.359195	0.362801	0.366634	0.354374	0.364214	0.355578	0.357062	0.357999	0.313171	0.308009	0.327401	0.300835	0.347371	0.25374	0.340078	0.361147	0.268298	0.363423	0.305	0.342134	0.334648	0.308953	0.299779	0.265128	0.384166	0.345001	0.358408	0.362567	0.30889	0.362876	0.307579	0.35991	0.321459	0.35442	0.367456	0.355408	0.341992	0.329412	0.31508	0.311554	0.363721	0.367372	0.365632	0.298939	0.346687
Synthesis_of_bile_acids_and_bile_salts_via_27-hydroxycholesterol	0.133657	0.376009	0.451277	0.459498	0.457154	0.455398	0.460607	0.454611	0.455746	0.452824	0.379438	0.455819	0.444956	0.26755	0.453399	0.452484	0.443283	0.386489	0.457944	0.453129	0.348723	0.454756	0.456083	0.438253	0.452608	0.340944	0.452346	0.362515	0.432941	0.448267	0.456925	0.177558	0.28795	0.446628	0.408972	0.459375	0.461958	0.45348	0.457009	0.457921	0.440249	0.24991	0.401257	0.456611	0.456793	0.461868	0.459511	0.403578	0.449181
Synthesis_of_bile_acids_and_bile_salts_via_24-hydroxycholesterol	0.133657	-0.0327386	0.370404	0.379707	0.382225	0.38315	0.384229	0.368502	0.385514	0.37616	0.374105	0.376828	0.358943	0.356836	0.379552	0.366858	0.362489	0.390602	0.376366	0.379707	-0.112093	0.377702	0.372768	0.356425	0.371278	-0.0550441	0.374207	-0.0770926	0.336021	0.361873	0.378473	-0.0479002	0.396564	0.381403	0.304104	0.379244	0.406586	0.376777	0.375389	0.375287	0.35406	0.338231	0.287093	0.38608	0.384024	0.384332	0.384641	0.288275	0.355037
Synthesis_of_bile_acids_and_bile_salts_via_7alpha-hydroxycholesterol	0.133657	0.349974	0.377792	0.415644	0.414298	0.416742	0.417972	0.405575	0.418021	0.412026	0.412319	0.414035	0.401174	0.395081	0.401671	0.404627	0.399445	0.409151	0.410996	0.41385	0.329624	0.419104	0.409013	0.392951	0.405113	0.371217	0.403551	0.260695	0.371178	0.391607	0.416032	0.366365	0.408129	0.407783	0.351615	0.414453	0.427186	0.401573	0.399949	0.410764	0.393192	0.325678	0.338813	0.420424	0.417774	0.418796	0.422651	0.340391	0.396001
Synthesis_of_bile_acids_and_bile_salts	0.133657	0.488993	0.477423	0.48531	0.481431	0.478828	0.485344	0.482403	0.478537	0.477646	0.381179	0.481376	0.472709	0.233888	0.477332	0.480122	0.469398	0.385071	0.484317	0.476929	0.470896	0.479702	0.483	0.46469	0.4789	0.450179	0.477633	0.481292	0.464082	0.476144	0.482315	0.247626	0.245977	0.467825	0.442532	0.485294	0.480016	0.478316	0.483394	0.484626	0.468053	0.217231	0.437651	0.479498	0.480388	0.486971	0.483772	0.440324	0.479475
Activation_of_Gene_Expression_by_SREBP_(SREBF)	0.133657	0.0704193	0.0434844	0.079466	0.158059	0.192665	0.209573	0.179838	0.152302	0.270486	0.21035	0.162113	0.212605	0.178932	0.242028	0.154032	0.0488994	0.246432	0.237966	0.179788	0.0727533	0.229585	0.225084	0.121021	0.052821	0.192615	0.127034	0.281071	0.169357	0.152538	0.240743	0.175335	0.217699	0.200439	0.0731476	0.16801	0.117274	0.0628741	0.15375	0.230337	0.134203	-0.0142389	0.0704716	0.245501	0.236008	0.213819	0.0822156	0.0795838	0.108727
Regulation_of_Cholesterol_Biosynthesis_by_SREBP_(SREBF)	0.133657	-0.00783916	-0.0201576	-0.0443796	0.238393	0.314243	0.242754	0.23754	0.2482	0.203319	0.344918	0.288068	0.242114	0.184589	0.265267	0.219062	0.136399	0.118589	0.239862	0.313878	0.120625	0.192729	0.296927	0.164805	-0.0360363	0.271761	0.167403	0.238518	0.138313	0.167113	0.301457	0.130029	0.28288	0.289442	0.172482	0.30919	0.189886	0.0379353	0.20377	0.246992	0.273742	-0.0345595	0.165838	0.334188	0.287818	0.173368	0.106686	0.217803	0.192019
Cholesterol_biosynthesis	0.133657	0.327382	0.3063	0.359448	0.361509	0.309423	0.395321	0.282998	0.263354	0.410175	0.29462	0.336237	0.335947	0.305942	0.341036	0.342995	0.21612	0.410028	0.308812	0.333581	0.139355	0.35531	0.34576	0.223825	0.340227	0.309979	0.293621	0.306701	0.245465	0.336787	0.269972	0.374523	0.395316	0.305694	0.0898109	0.301577	0.15115	0.333654	0.350154	0.401141	0.278879	0.149199	0.157282	0.310836	0.321673	0.408513	0.282565	0.206496	0.296803
Visual_signal_transduction__Rods	0.133657	0.128844	0.231224	0.170202	0.125648	0.233639	0.17489	0.122456	0.182743	0.189374	0.0408132	0.230147	0.213691	0.17166	0.147532	0.221003	0.174129	0.206721	0.0664615	0.177937	0.122392	0.184364	0.115686	0.157738	0.252056	0.203545	0.178229	0.215752	0.177644	0.190198	0.174436	0.209243	0.148825	0.18068	0.151505	0.148631	0.217686	0.173869	0.257786	0.187956	0.210815	0.215884	0.15294	0.187159	0.192227	0.189673	0.0659488	0.160867	0.144424
Dimerization_of_procaspase-8	0.133657	-0.104495	0.257552	-0.0519275	0.177804	0.0300804	-0.0637611	0.163564	0.0842362	0.210102	0.152327	0.066515	0.162373	0.142117	-0.0378057	0.177134	0.148071	0.0250125	-0.0224074	0.0786875	0.0681589	0.162209	-0.0140953	0.0797618	0.182723	0.287328	0.224292	0.083615	0.282364	0.238691	-0.0639011	0.176619	0.0583812	0.0937332	0.0799939	0.00154478	0.0179579	0.102268	0.0480357	0.260198	-0.0706957	0.166807	0.0712739	0.191626	0.167031	-0.0349901	0.0574918	0.119357	0.26327
Caspase-8_activation	0.133657	-0.0776078	0.252852	-0.0316201	0.18756	0.0368427	-0.0390101	0.16118	0.10124	0.209145	0.152337	0.0859315	0.169746	0.148649	-0.0246811	0.186615	0.150217	0.0299046	-0.00806769	0.078367	0.0615064	0.167738	-0.00335569	0.0936451	0.169124	0.276962	0.230159	0.106823	0.269335	0.230826	-0.0440228	0.174155	0.0819082	0.108686	0.067002	0.0134535	0.0505856	0.125392	0.0778076	0.25158	-0.0540259	0.164514	0.05859	0.194318	0.18102	-0.0151399	0.0885464	0.110849	0.251726
TRAIL__signaling	0.133657	-0.0589644	0.244001	-0.0774749	0.0586325	0.134174	-0.0682552	0.0615707	0.221226	0.338073	0.0575214	0.240602	0.0301477	0.264722	-0.165101	0.181284	0.047545	0.12988	0.0619553	0.140135	0.123529	0.231107	0.128626	0.287842	0.0389621	0.318676	0.300608	0.204926	0.274955	0.352611	0.0168588	0.0848386	0.219315	0.188708	0.093963	-0.089559	0.0602382	0.201867	0.115643	0.301379	-0.0847748	-0.0170291	0.0859045	0.340275	0.146392	-0.0180694	0.0683978	0.0909755	0.0105257
TNF_signaling	0.133657	-0.0881337	0.16136	-0.00927952	0.267896	-0.0322261	0.053734	0.244895	0.0246202	0.0477471	0.221439	0.0236198	0.00268944	0.15244	0.115183	0.182237	0.150974	-0.00428465	0.00274165	0.0729488	-0.145024	0.200129	-0.0479059	-0.00880646	0.219281	0.241741	0.197454	0.0119902	0.17849	0.0935176	-0.0168648	0.208554	-0.0217361	-0.01226	0.0383371	0.149745	0.0480226	-0.0075698	0.00970474	0.164214	-0.020284	0.216762	0.0136603	0.0145312	0.190555	0.0664331	0.0968687	0.0763289	0.206399
FasL/_CD95L_signaling	0.133657	-0.0521028	0.327426	-0.0282121	0.101295	-0.0548948	-0.0278975	0.0279261	0.021582	0.0864519	0.0416802	0.0651824	0.297488	-0.0463245	-0.107104	-0.0175493	0.268735	-0.12815	0.0623933	-0.023302	0.198796	-0.051411	-0.102683	0.0375297	0.282939	0.124864	0.0979874	-0.0371529	0.311476	0.138709	0.0337272	0.0603561	-0.0427856	0.0431695	0.14692	-0.032277	-0.0167954	0.00507337	-0.0772778	0.0603646	0.0377341	0.270305	0.180687	0.0308878	0.017285	-0.0354295	0.0835415	0.211471	0.38358
Activation__myristolyation_of_BID_and_translocation_to_mitochondria	0.133657	-0.174756	0.0129633	-0.0774975	0.31237	-0.119789	-0.00144373	0.0918785	-0.00297132	0.174161	0.241652	-0.0155734	0.155706	-0.00850419	-0.208757	0.238598	-0.0202328	-0.095228	-0.192356	-0.0755668	-0.0944683	0.0802382	-0.0827001	-0.0965559	-0.0610727	0.238525	0.325063	0.300004	0.113462	0.211276	-0.00275338	0.176125	0.00438667	0.170264	-0.0924133	0.0154271	0.199762	0.179403	0.235703	0.168965	-0.103086	0.0534822	0.0234904	0.159772	0.116025	-0.0685805	0.276947	0.148831	0.273678
rac1_cell_motility_signaling_pathway	0.133657	0.00517515	0.00170542	-0.0544809	0.0445278	-0.0359415	-0.018434	-0.100359	-0.0450607	0.0228414	-0.0208971	0.0277452	0.0240766	0.0204591	-0.0499912	-0.0345623	-0.0295766	0.0139489	-0.0852334	0.0338946	0.0289644	0.0550887	-0.0336284	-0.0209149	-0.0133111	-0.0560258	-0.0720732	0.0120149	-0.015365	0.0289172	0.0521841	0.0333358	0.0457001	-0.00353441	0.0242119	-0.022107	-0.0751304	0.0684166	0.00794906	0.0328865	-0.00351968	0.0505438	0.000772455	0.0403248	-0.0607892	0.000646779	-0.0434631	-0.0261981	-0.0508867
Metabolism_of_folate_and_pterines	0.133657	0.180189	0.175122	0.260399	0.327478	0.375131	0.145926	0.361343	0.377973	0.438786	0.347943	0.324846	0.066511	0.334654	0.36682	0.0622656	0.235876	0.0592341	0.436518	0.236221	0.162446	0.274659	0.357077	0.330448	0.322884	0.368843	0.23384	0.269698	0.293207	0.206598	0.202119	0.262178	0.299101	0.391086	0.203089	0.199985	0.221873	0.307293	0.211142	0.364606	0.215286	0.0599001	0.157885	0.359279	0.377399	0.237401	0.326154	0.202069	0.218159
Nicotinamide_salvaging	0.133657	0.29398	0.28699	-0.334068	0.438194	0.465177	0.465279	0.268282	0.429817	-0.419538	-0.321836	0.457673	0.420977	0.424934	-0.437012	0.420309	0.412856	-0.471704	-0.411366	0.42735	0.460757	0.429406	0.27337	0.466975	0.428737	-0.412856	-0.410389	0.466307	0.417636	0.426784	0.279692	-0.39348	0.481829	0.455206	0.3629	-0.420566	0.465485	0.43141	0.425757	-0.420874	0.402937	-0.421439	0.368502	-0.439016	0.289714	-0.335404	0.424061	0.154082	0.252401
Amino_acid_synthesis_and_interconversion_(transamination)	0.133657	-0.332376	-0.442254	-0.1959	-0.322777	-0.443548	-0.446202	-0.478035	-0.480853	-0.471335	-0.448085	-0.440339	-0.408199	-0.352897	-0.259499	-0.259256	-0.269455	-0.441966	-0.476903	-0.256046	-0.423699	-0.254418	-0.482504	-0.237302	-0.319948	-0.466055	-0.465255	-0.260494	-0.25507	-0.470934	-0.373947	-0.3279	-0.189738	-0.430802	-0.308416	-0.474975	-0.249174	-0.468239	-0.360073	-0.297169	-0.266419	-0.349047	-0.30906	-0.483996	-0.442661	-0.234758	-0.247943	-0.476647	-0.27109
Molybdenum_cofactor_biosynthesis	0.133657	0.181168	0.183583	0.417636	0.427196	0.422364	0.421388	0.406175	0.421902	0.417996	0.410081	0.408899	0.400265	0.4384	0.399905	0.407614	0.134244	0.153003	0.35514	0.419024	0.324303	-0.477511	0.411983	0.393994	-0.478385	0.425654	0.152438	0.135529	0.392041	0.414295	0.413833	0.160558	0.190624	0.434699	0.350874	0.417636	0.373436	0.419229	0.145345	0.414809	0.393172	0.392196	0.335969	0.420977	0.419332	0.424112	0.415889	0.33931	0.399648
Branched-chain_amino_acid_catabolism	0.133657	0.226429	0.160572	-0.236358	-0.236406	-0.242914	-0.229175	-0.260892	-0.241182	0.156837	-0.256055	0.160774	0.14419	-0.281527	-0.265346	-0.282756	-0.259374	0.215294	-0.245432	-0.239731	-0.285853	0.159778	-0.255551	-0.26989	0.153622	-0.246625	0.203352	0.142434	0.172502	-0.26637	-0.256573	0.155192	-0.253632	0.145616	-0.298554	-0.244012	-0.229062	0.20411	0.171548	-0.255801	-0.253841	-0.279009	-0.30118	-0.256675	0.166236	0.212504	-0.241315	0.132251	-0.261988
Activation_of_PKB	0.133657	0.0735008	0.0455373	0.25312	0.356347	0.144763	0.258072	0.19912	0.147408	0.175625	0.277966	0.36083	0.199325	0.122593	0.348867	0.151683	0.243919	0.17424	0.308213	0.346532	0.1058	0.248591	0.17666	0.00338692	0.13573	0.181952	0.338071	0.247817	0.0950787	0.121624	0.21446	0.23013	0.402765	0.149532	0.336723	0.0221048	0.258103	0.2412	0.254711	0.158465	0.155724	0.031302	-0.0432275	0.111748	0.164157	0.070569	0.251685	0.21016	0.149873
NICD_traffics_to_nucleus	0.133657	0.000617754	-0.13639	0.0500271	-0.1159	-0.0346657	0.0256896	-0.0407284	-0.0351765	-0.0186559	0.0661018	0.047461	0.0442636	-0.00089827	0.0681779	-0.00658248	-0.036541	0.0575603	-0.0454051	0.0450492	0.0194304	0.020234	-0.106488	-0.0126921	0.0145971	0.0394793	-0.0615538	-0.0500432	0.0241146	-0.143679	0.0695078	-0.11041	0.00934491	0.0811995	-0.0385057	0.0507048	-0.113495	0.0834529	0.00972906	0.0182611	0.0159173	-0.00872053	-0.0861373	0.0539638	0.00404606	-0.00562313	-0.0604932	0.00276681	0.0415489
Circadian_Repression_of_Expression_by_REV-ERBA	0.133657	-0.030359	0.0190555	-0.0306234	0.0137964	0.113566	0.00252428	0.120245	0.0526031	0.00692191	0.0918086	0.0569096	0.135326	0.0610313	0.0790126	0.0521937	0.00953808	0.132779	0.22686	0.0653788	0.109709	-0.0187526	0.147244	0.147634	0.0410989	0.0828326	0.0391222	0.172624	0.110322	0.0803718	0.183669	0.0514315	0.202227	0.121518	0.0819011	0.0657496	0.024717	0.0981458	0.0402638	0.103365	0.0212259	0.0299784	0.0927755	0.151467	0.103395	0.0614707	0.048946	-0.0286977	-0.0190662
BMAL1_CLOCK/NPAS2_Activates_Circadian_Expression	0.133657	0.0227605	0.0210399	0.0261324	0.0761608	0.110015	0.0614526	0.149196	0.0277329	0.00308113	0.126352	0.119029	0.132475	0.11509	0.0643553	0.102069	0.0928591	0.0982081	0.20241	0.0893975	0.178526	0.0027524	0.103305	0.211276	0.0407557	0.0717928	-0.0102692	0.221031	0.170035	0.147305	0.175455	-0.00804766	0.2418	0.153406	0.132812	0.0664285	0.0440829	0.11227	0.0501554	0.0883145	0.0406514	0.0272823	0.13314	0.09928	0.132881	0.0215425	0.0817126	-0.00693173	0.0167325
Circadian_Clock	0.133657	-0.042006	0.00250619	0.0139713	0.0220246	0.0547863	0.0471745	0.090099	0.0571034	0.0276691	0.0925352	0.0816779	0.0868169	0.101112	0.082153	0.11783	-0.00173254	0.101386	0.179947	0.0244793	0.147323	0.00782809	0.0938103	0.175091	0.0590209	0.0807773	0.00247194	0.14135	0.09894	0.0789227	0.109709	-0.0415333	0.197928	0.123663	0.161806	0.0921246	0.10819	0.160003	-0.0033561	0.0674631	0.0683285	0.0548626	0.11387	0.0714531	0.126857	-0.00113996	0.0241818	-0.0434608	-0.00238886
APC-Cdc20_mediated_degradation_of_Nek2A	0.133657	0.106769	0.0937272	0.0159055	0.105	0.0501682	0.0873377	0.0144376	0.0933575	0.193993	0.0295871	-0.0772892	0.0295951	0.14381	0.0919989	0.0866837	-0.0536585	0.253248	0.0486531	-0.00744997	-0.0181313	0.120554	0.000217649	0.0486815	0.110799	0.0874845	0.14267	0.0122792	0.00469417	0.0472051	0.0687545	0.151973	-0.026099	-0.0136361	-0.0138741	0.0841711	0.13756	0.0695325	0.0914441	0.157206	0.061195	0.114434	-0.0742243	0.107449	-0.00332311	0.0705774	0.0931133	-0.104537	0.0535815
A_third_proteolytic_cleavage_releases_NICD	0.133657	0.0564739	0.0913446	0.164538	0.148333	0.168155	0.174248	0.114807	0.0215836	0.140966	0.169598	0.165877	0.183463	0.102497	0.0237437	0.217266	0.123109	0.0797306	0.114924	0.0572192	0.127591	0.206087	0.139354	-0.0509294	0.0914115	0.188206	0.128014	0.135491	0.133927	0.146607	0.215769	0.0972203	0.180086	0.0926753	-0.0013753	0.152437	0.0275295	0.175059	0.106209	0.19645	0.167622	0.167193	0.0743858	0.151442	0.155819	0.1579	0.144947	0.117195	0.160786
RORA_Activates_Circadian_Expression	0.133657	-0.0231081	-0.00143605	-0.0223073	0.0260539	0.127313	0.0315929	0.136509	0.0826058	0.0424162	0.115703	0.0726918	0.178732	0.0978717	0.0802897	0.066903	0.0131484	0.140427	0.250824	0.0642601	0.149668	0.0177214	0.166502	0.185093	0.0172744	0.0942554	0.0601666	0.214516	0.141725	0.069687	0.20876	0.0679666	0.229973	0.11142	0.0889978	0.0921475	0.0304576	0.0781515	0.0173086	0.1264	0.0409603	0.0376914	0.128246	0.146254	0.098722	0.0686781	0.0528979	0.00384268	-0.0102407
mcalpain_and_friends_in_cell_motility	0.133657	-0.0199984	-0.062778	-0.0095494	-0.0251923	-0.0382733	-0.0435404	-0.00749695	-0.00477698	-0.0470894	0.00806475	-0.0236894	-0.0725461	-0.0393223	0.00306197	-0.0631893	-0.0221502	-0.0219999	0.00615717	-0.00193508	-0.0464042	-0.0216122	0.019334	-0.036921	-0.0138478	-0.0396182	-0.0210411	-0.0306569	-0.0126154	-0.0112932	-0.00579101	-0.067734	-0.0272165	-0.0770128	-0.0127009	0.0101645	-0.0229352	-0.0296186	-0.0106019	-0.050674	-0.0577552	-0.026775	-0.0502502	0.00480915	-0.029985	-0.0569491	0.00599754	0.0354528	-0.0261559
brca1_dependent_ub_ligase_activity	0.133657	0.0911465	0.0251655	-0.00122184	0.0169761	0.0187632	0.0736679	-0.0198272	0.0339698	0.0513878	-0.0283602	-0.0052228	-0.00383899	0.0766094	0.0368748	0.0118555	0.0138241	0.132042	0.0301341	-0.0460218	-0.0295614	-0.0257276	0.0225406	-0.00719927	0.0335415	0.119179	-0.00446634	-0.0647512	-0.0313126	-0.05667	-0.0096363	0.0346159	-0.0758513	0.0414337	0.00179648	0.0157149	0.0573106	-0.0866076	-0.0172309	-0.0421891	-0.00425773	0.0229634	-0.0526769	0.111413	-0.0133031	0.01318	-0.0129605	-0.12136	0.011976
CXCR4-mediated_signaling_events	0.133657	0.0337311	0.0749066	0.0474265	0.0172749	0.0542844	0.0271128	0.0298676	0.0418233	0.0350945	0.00240069	0.0261953	0.0753595	0.0465682	0.0131227	0.030063	0.000949689	0.0343835	0.0234027	0.0382724	0.114983	0.0396313	0.0122501	0.013955	0.0454194	0.0264061	0.0144737	0.060668	0.0714257	0.037481	0.0275222	0.0839254	0.0388412	0.0250414	0.120857	0.0088356	0.0416505	0.0402428	0.00629772	0.0463628	0.085355	0.0599601	0.0984397	0.00497609	0.0187666	0.00476238	0.0340862	0.0452025	0.0775175
GRB7_events_in_ERBB2_signaling	0.133657	0.0860167	0.287711	-0.122875	0.051634	0.27001	-0.131193	0.0995405	-0.119768	0.132272	0.00219608	0.246186	0.174378	-0.0536299	-0.151547	0.343553	0.204594	-0.0542948	0.0451962	0.236854	-0.131234	0.0337957	0.0368915	-0.0511842	-0.133801	-0.137673	0.239932	0.357169	0.259143	0.140876	0.410374	-0.143348	-0.116612	0.179629	0.144626	-0.152103	0.104853	0.233764	0.354688	-0.143412	0.211028	-0.0890346	0.229611	0.198628	0.00581214	-0.115519	0.0845271	0.0481267	-0.0605929
PLCG1_events_in_ERBB2_signaling	0.133657	0.0285463	0.169749	0.0298545	-0.0763888	0.174336	0.00680698	0.0103399	-0.0687626	-0.0347976	-0.0354029	0.167425	0.141051	0.129921	-0.00378745	0.213279	0.135871	-0.0933417	0.014233	0.172705	0.115702	0.110193	0.0525148	-0.0120345	-0.0889118	-0.0351086	0.0704878	0.147879	0.173137	-0.00291961	0.189093	-0.0851915	0.0367161	-0.00280825	-0.0620101	-0.0252728	0.0279582	0.159638	0.148792	-0.016131	0.19203	-0.132049	0.0739669	0.185223	-0.0774157	-0.0564621	-0.00696483	0.0625795	-0.103416
Regulation_of_KIT_signaling	0.133657	-0.0428172	-0.0292517	-0.0091152	-0.0514475	-0.028022	0.0178638	-0.0231416	0.182948	-0.0451851	-0.0249254	-0.00413025	-0.0127696	-0.0269832	0.0169272	-0.0375597	-0.0822721	-0.0465333	-0.0277645	-0.0404968	0.0338015	-0.0486591	-0.0140674	-0.0569753	-0.0515404	-0.0617351	-0.0345919	-0.0316739	0.0545768	0.0475294	-0.0310075	-0.0369123	0.0459651	-0.0296369	0.253824	-0.073309	-0.0167538	0.0282348	-0.0344829	-0.0357108	-0.0561834	-0.0295716	0.0057691	-0.0493748	0.00607262	-0.0886332	0.0135562	-0.010952	0.0150585
Signaling_by_SCF-KIT	0.133657	-0.0156315	-0.0208887	0.0101493	0.0333951	-0.0218211	-0.013463	0.0258995	0.128975	-0.0151563	0.0145049	0.0100684	-0.00664835	0.0153333	0.0233473	-0.0356017	-0.0541184	-0.00421092	-0.0133097	-0.00587964	0.102736	-0.0011426	0.0128205	-0.0150836	-0.0598192	0.00289214	-0.00370092	-0.00259233	0.0551323	0.020043	0.0337143	-0.0333125	0.0288642	0.0229929	0.224192	0.000320949	0.00116356	0.0694605	-0.0308183	-0.00292124	-0.0661254	0.0226832	0.0827064	-0.00227663	0.00442068	-0.0413284	0.0387005	0.0821364	0.0561047
Neurophilin_interactions_with_VEGF_and_VEGFR	0.133657	-0.360837	-0.343382	0.181727	-0.346606	0.105627	-0.020841	0.275597	0.108338	-0.014345	0.208551	0.0483497	-0.0598885	0.0622405	0.322944	-0.153864	0.315835	-0.0230048	0.197792	-0.00622868	0.306946	0.0966483	0.152193	0.456135	-0.0855002	0.342613	0.162781	0.146238	0.312173	-0.343269	0.24707	-0.23844	0.0808789	0.318127	0.43879	0.240329	-0.122057	0.0883213	-0.154996	-0.0112528	0.345827	-0.0505475	0.166841	0.0954822	0.296223	-0.223294	-0.170839	0.324611	0.14156
VEGF_binds_to_VEGFR_leading_to_receptor_dimerization	0.133657	0.0433929	-0.173437	0.230565	-0.031421	0.10054	-0.0120006	0.174238	0.126606	-0.14251	0.200707	0.209497	0.0647859	0.265605	0.288082	0.116299	0.227282	-0.0120609	0.150334	0.110343	0.238552	0.123315	0.132554	0.189861	0.142563	0.255081	0.169506	0.187663	0.294668	-0.131355	0.160543	-0.108364	0.261082	0.305669	0.208654	0.224258	0.13798	0.0227886	0.25296	0.113618	0.344777	0.2101	0.195709	0.10362	0.21464	-0.0532504	-0.135833	0.193043	0.175495
PI3K_events_in_ERBB2_signaling	0.133657	0.00573152	0.120919	-0.0252844	0.062999	0.187235	-0.0863666	-0.0179781	-0.0550543	0.0248609	-0.0239792	0.135123	0.0822134	0.00979282	-0.0398338	0.186274	0.227966	-0.0467799	0.00709214	0.232217	0.116329	0.0586942	0.0240905	-0.0330527	-0.0398117	-0.0933242	0.116339	0.179685	0.212141	0.0153935	0.161512	-0.102352	-0.046338	0.147524	0.127249	-0.0969436	0.0423409	0.173633	0.196967	-0.0614271	0.150302	-0.128546	0.197584	0.115623	0.0165957	-0.0709973	0.0691007	0.0646799	-0.0783258
GRB2_events_in_ERBB2_signaling	0.133657	-0.00306337	0.0812748	-0.0634191	0.058906	0.110789	-0.0909892	-0.0929331	-0.104107	-0.0532594	-0.0920242	0.0599807	-0.000288443	0.0111266	-0.0444298	0.137043	0.215236	-0.0775062	-0.0681125	0.205566	0.141335	0.0553261	-0.0379602	-0.0292283	-0.0367145	-0.0929672	0.0816302	0.146282	0.131604	-0.0339298	0.0603458	-0.0930039	-0.0566392	0.0539504	0.0424414	-0.144795	0.00192016	0.108356	0.121582	-0.05345	0.089822	-0.135839	0.138945	-0.0113501	-0.067225	-0.0836335	0.00384859	0.0366062	-0.131194
SHC1_events_in_ERBB2_signaling	0.133657	0.0489383	0.131453	-0.0566473	0.0664503	0.153563	-0.0800066	-0.0552351	-0.0885914	-0.013795	-0.0559504	0.107273	0.0402423	0.0132435	-0.0470314	0.181322	0.212749	-0.072209	-0.0341748	0.214659	0.0801523	0.0266393	-0.0113266	-0.028422	-0.0384609	-0.0827733	0.124527	0.207943	0.180493	-0.00027987	0.131876	-0.0847713	-0.0498764	0.0812551	0.0636273	-0.126343	0.0354998	0.143206	0.200161	-0.0528413	0.121253	-0.125145	0.165565	0.0499173	-0.0354189	-0.0689677	0.0312987	0.0379502	-0.107746
Signaling_by_ERBB2	0.133657	0.0344719	0.185517	-0.0251061	0.0591814	0.207971	-0.0156113	0.019285	-0.0270721	0.015159	0.000817535	0.143005	0.0834552	0.0388258	-0.0279908	0.213996	0.250102	-0.0305881	0.00830172	0.254954	0.0930701	0.093335	-0.00821503	0.0151066	-0.00824504	-0.0317508	0.168388	0.193001	0.180821	0.0328355	0.186265	-0.0700996	-0.0626641	0.0611608	0.0637463	-0.0633669	0.0278536	0.160019	0.211125	-0.0471231	0.20435	-0.0671572	0.199711	0.10748	0.00818812	-0.0396669	0.0233895	0.0122367	-0.050757
TRAF6_mediated_induction_of_TAK1_complex	0.133657	0.0917163	0.0972721	0.063572	0.18257	0.199783	0.116723	0.144342	0.125854	0.0492924	0.0769808	0.164039	0.175633	0.202349	0.051068	0.0745308	0.0998654	0.0781879	0.199419	0.0961969	0.221427	0.0657323	0.0172048	0.272262	0.18595	0.216037	0.158263	0.0297816	0.24692	0.0835792	0.229139	0.0675092	0.122957	0.0467041	0.165871	0.0758103	0.0738742	0.0899475	0.0747992	0.0777288	0.17238	0.0504292	0.141421	0.0700885	0.191364	0.0993645	0.101603	0.206668	0.0404552
TRIF-mediated_programmed_cell_death	0.133657	-0.0753004	0.00207661	-0.107869	0.21101	0.0850136	-0.0220774	0.14343	-0.0130244	0.0497423	0.054246	0.118774	0.211845	0.126137	-0.130031	-0.00406514	0.171226	-0.0959656	0.12531	-0.0154717	0.176547	0.00146941	-0.134885	0.195778	0.136574	0.191937	0.224419	-0.00299724	0.22423	0.0694529	0.16506	0.0420378	0.111108	-0.0212196	0.0722468	-0.074448	-0.044643	0.0364642	-0.00498582	0.056071	0.0754954	-0.0422066	0.164452	-0.0320163	0.119848	-0.0072509	0.150058	0.196001	0.00020265
Toll_Like_Receptor_7/8_(TLR7/8)_Cascade	0.133657	-0.126299	-0.0907624	-0.105922	-0.136496	-0.0990814	-0.0713106	-0.14387	-0.103134	-0.144009	-0.126681	-0.0904626	-0.126364	-0.126254	-0.148336	-0.116017	-0.118082	-0.123197	-0.14035	-0.101401	0.21322	-0.104378	-0.146935	-0.126281	-0.143893	-0.133343	-0.11714	-0.151397	0.0932917	-0.151269	-0.111751	-0.135952	-0.0873242	-0.125958	0.176021	-0.132973	-0.0990193	-0.135995	-0.117725	-0.114322	-0.134256	0.298272	0.335965	0.104752	-0.130939	-0.0892376	0.0504095	0.336541	0.223529
Toll_Like_Receptor_5_(TLR5)_Cascade	0.133657	-0.0820312	-0.0960609	-0.0806005	0.184938	-0.107461	-0.0716999	-0.108736	-0.105856	-0.104628	-0.102781	-0.097879	0.34451	-0.137103	-0.113113	-0.109278	-0.130222	-0.109927	-0.093851	-0.105513	-0.139663	0.181118	-0.103214	-0.136711	-0.11747	-0.0968937	-0.119456	-0.117772	-0.16589	-0.136358	-0.102454	-0.111484	-0.0725575	-0.131026	-0.181026	-0.0914067	-0.0843677	0.36056	-0.106915	0.163796	-0.13197	0.33341	-0.185733	-0.100168	-0.0906915	-0.074168	-0.0852761	-0.189871	-0.115221
MyD88-independent_cascade	0.133657	-0.0149107	0.0658691	-0.0655886	0.183664	0.189364	-0.000679164	0.105702	0.0348967	-0.025829	-0.0151267	0.181647	0.218454	0.197581	-0.0890334	-0.00622495	0.136052	-0.0364844	0.193326	0.0605643	0.320727	0.0194531	-0.0975909	0.294723	0.199164	0.174622	0.18238	-0.0325783	0.339983	-0.00886659	0.234617	0.044862	0.178892	-0.0299754	0.191838	-0.066955	-0.0881589	0.051096	0.0371028	0.00524102	0.134382	0.00570487	0.197267	-0.147465	0.158282	0.00621936	0.0916035	0.303402	-0.0889089
IKK_complex_recruitment_mediated_by_RIP1	0.133657	0.056833	0.0987703	-0.00508486	0.134209	0.107132	0.0725865	0.110066	0.0405502	0.0431174	0.0276338	0.0950239	0.165682	0.0825414	0.0026942	0.0557591	0.0781397	0.0810981	0.112381	0.0251205	0.153157	0.102033	-0.0390002	0.164974	0.172606	0.186038	0.175217	0.00437047	0.175295	0.0523514	0.144569	0.0782782	0.0574216	-0.0231806	0.142108	-0.00894489	0.0633582	0.0855654	0.0715127	0.101468	0.0821449	0.0962165	0.0936378	0.0143548	0.117104	0.0484175	0.0824508	0.13703	0.00234041
Activation_of_IRF3/IRF7_mediated_by_TBK1/IKK_epsilon	0.133657	0.1052	0.131871	0.0345136	0.18008	0.0703042	0.112186	0.0580189	0.114226	0.142709	-0.000788356	0.04646	0.184423	0.190064	0.0440131	0.107821	0.0605163	0.121813	0.181628	0.0234722	0.150169	0.100353	-0.0356066	0.167467	0.167924	0.192392	0.115722	0.0331953	0.264749	0.0846865	0.0736136	0.08329	-0.0135632	-0.0200274	0.0926543	0.0774301	-0.0161393	-0.00342245	0.00717585	0.141531	0.110055	0.118842	0.117344	0.0223161	0.0672451	0.0891326	-0.0049054	0.0950633	0.0160253
TRAF6_mediated_induction_of_NFkB_and_MAP_kinases_upon_TLR7/8_or_9_activation	0.133657	-0.00727228	-0.0198521	-0.0213549	0.0528446	0.0665311	-0.00319453	0.0718528	0.0971433	0.0295572	0.0275994	0.188357	-0.0117168	0.015215	0.0597864	0.0467183	0.0896465	0.0454417	0.0770852	7.17e-05	0.137023	0.037867	0.0646978	0.0574301	0.12519	0.0744738	0.0668627	0.202932	0.0826866	0.191706	0.0722996	0.0336506	-0.00288416	0.0639505	0.139832	0.129669	0.0805933	0.0371194	0.0487742	0.111544	-0.0320312	0.194119	0.212694	0.144644	0.110682	0.0105682	0.135714	0.225723	0.113998
MyD88_dependent_cascade_initiated_on_endosome	0.133657	0.024125	-0.0456795	-0.0209351	0.0738866	0.100182	-0.00395481	0.102697	0.117996	0.0643254	0.0502857	0.204233	-0.0541208	0.0344733	0.0631672	0.0793667	0.136965	0.0641978	0.118815	0.0147998	0.104584	0.0607183	0.0988767	0.0588469	0.142766	0.0791488	0.0917627	0.248497	0.0837956	0.192037	0.0758444	0.0889961	0.0281113	0.0951916	0.129053	0.145032	0.112306	0.0557036	0.0766923	0.123457	-0.02172	0.168574	0.193204	0.139875	0.125684	0.0272481	0.145784	0.239926	0.0954188
Beta2_integrin_cell_surface_interactions	0.133657	-0.078813	-0.0877674	-0.324288	-0.322638	-0.329527	-0.321374	-0.344981	-0.329013	-0.352218	-0.338089	-0.337553	0.194612	-0.348968	-0.347132	-0.341627	-0.0996699	-0.353173	-0.330484	-0.324478	0.168435	-0.343636	-0.338679	-0.349362	-0.333043	-0.332266	-0.334876	-0.330728	0.148272	-0.345416	-0.338594	-0.0963958	-0.309762	-0.352485	-0.168794	-0.33117	-0.346041	-0.352396	-0.33246	-0.353222	-0.356167	0.223083	-0.0483936	-0.339556	-0.32932	-0.33533	-0.328894	0.156899	0.243033
antigen_processing_and_presentation	0.133657	0.069396	0.285799	-0.0831988	0.166124	-0.0432312	0.128567	0.115761	0.162738	-0.140946	-0.0582223	-0.11781	0.262977	0.153539	0.0978831	0.204064	0.0331655	-0.0693067	0.204292	0.0268804	0.0676443	-0.0909873	-0.10941	-0.121823	0.317614	0.218008	0.152094	-0.0318445	0.377549	-0.189986	-0.124684	0.162785	0.0395425	-0.193266	0.219036	-0.0018835	-0.0410325	-0.141004	-0.0507901	-0.0481009	0.0117791	0.269502	0.307466	-0.126547	0.0998917	0.119454	0.345963	0.24365	0.40967
cell_cycle__g1/s_check_point	0.133657	0.0335145	-0.0107384	-0.0134785	-0.0415218	-0.0246495	-0.0342607	0.00157911	-0.0458643	0.0235683	0.0121715	-0.0677123	-0.0323203	0.0904714	-0.029445	-0.124781	-0.019418	-0.0233066	0.0294585	-0.0380849	0.0242132	-0.0565977	0.0576197	-0.0153849	0.0844153	0.00496569	0.00414644	0.0208016	0.0319032	-0.0313933	-0.00684043	0.0390614	-0.0148817	-0.0001132	0.0144371	-0.0764245	-0.00351406	0.00896376	0.0837906	0.0395013	-0.0475593	-0.0397852	-0.0419584	0.00539027	0.0179232	0.0147462	0.016037	0.0238402	-0.0444287
Trafficking_of_GluR2-containing_AMPA_receptors	0.133657	-0.0701776	-0.0838642	-0.117239	-0.0940737	-0.0542808	-0.00335226	-0.0352819	-0.0135395	-0.0789951	-0.0764479	-0.0896724	-0.0306792	-0.106571	-0.040555	-0.0317177	-0.00169876	-0.030006	-0.0450863	-0.0226133	-0.000850242	-0.0608174	-0.00420839	-0.0026773	-0.0258651	-0.0524617	-0.016413	-0.046061	0.00968461	0.104399	-0.074982	0.0684724	-0.00403335	0.0815937	0.019632	0.02201	-0.134617	0.0426823	-0.0150283	0.0303838	-0.0382913	-0.0424894	-0.0134651	0.0255309	-0.0189127	-0.0952192	-0.0469397	-0.075661	0.112173
Trafficking_of_AMPA_receptors	0.133657	0.00509145	0.0967426	-0.0104444	0.0447676	0.107571	-0.0119345	0.0668043	0.054156	-0.0911992	-0.137353	0.119934	0.0568446	-0.0591675	0.0680308	-0.158631	0.075252	-0.0393265	0.0976717	0.175823	0.0702041	0.0838276	0.0555802	0.0886371	0.0363419	-0.0997646	0.126622	-0.173698	-0.0704194	-0.00236385	-0.0197186	-0.170172	-0.00260919	0.00517719	0.102165	0.079804	-0.137666	0.0906062	0.0977037	-0.0370392	0.111793	-0.0590876	0.0415605	0.114112	0.0119858	-0.0852942	0.047971	0.0701246	-0.0398168
RAF_activation	0.133657	0.0462351	-0.0532922	0.0816182	0.068972	0.0281673	-0.0407976	0.0372903	0.0468966	0.0379615	0.0438276	0.0545131	0.0333555	0.0779574	0.116459	0.107758	0.0310203	-0.0859739	0.0531596	0.0532362	-0.0284885	0.0198742	0.128021	0.12991	0.129856	0.12958	0.131775	0.17435	0.0499121	0.0247646	0.0412478	0.0946069	0.148255	0.0940329	-0.0255729	0.0567645	0.142801	0.230257	0.10801	0.0398772	0.0153583	0.0174483	-0.036588	0.0505713	0.0580198	0.0800735	0.144208	0.0129307	0.03294
Highly_sodium_permeable_acetylcholine_nicotinic_receptors	0.133657	-0.0299128	-0.0323404	-0.0401012	0.0342135	-0.0240345	-0.0196082	-0.0335949	0.0122953	0.201584	-0.0297064	-0.0481782	0.0170594	-0.0714594	-0.050295	-0.00491999	-0.0705745	-0.00239315	0.0339008	0.267433	0.00899936	-0.11918	-0.000869645	-0.0107768	-0.0582114	-0.0873537	-0.0440803	0.131845	-0.0395063	0.213923	-0.0424127	-0.089058	-0.0561554	0.139319	-0.0472442	0.24272	-0.0646278	0.35921	0.18364	-0.0522012	-0.0733488	-0.161258	-0.081675	0.202241	-0.102988	-0.105588	-0.037926	-0.0549453	-0.0393929
Highly_calcium_permeable_postsynaptic_nicotinic_acetylcholine_receptors	0.133657	-0.133095	-0.125303	-0.212199	-0.218306	-0.158934	-0.204461	-0.0804251	-0.169632	-0.081215	-0.155122	-0.225493	-0.111281	-0.155202	-0.18374	-0.0163086	0.0564334	-0.147701	-0.134542	0.0853456	-0.138879	-0.207397	-0.105837	-0.149417	-0.219569	-0.214411	-0.19653	-0.0756282	-0.149987	-0.00242463	-0.194004	-0.255117	-0.204795	-0.132968	-0.224689	-0.0740934	-0.132944	0.00665507	-0.100673	-0.152609	-0.238463	-0.322999	-0.250702	-0.120013	-0.199355	-0.266307	-0.140068	-0.261853	-0.2321
Highly_calcium_permeable_nicotinic_acetylcholine_receptors	0.133657	-0.0314612	-0.0226499	-0.124745	-0.130552	-0.0665412	-0.115189	0.00895038	-0.0940384	0.0531066	-0.0831592	-0.138887	-0.0374973	-0.0546294	-0.0919937	0.114545	0.0461835	-0.0379039	-0.0669414	0.0669755	-0.0505599	-0.0880596	-0.0116604	-0.149056	-0.139579	-0.105239	-0.119364	0.0545154	-0.0582972	0.110017	-0.115942	-0.16775	-0.118249	0.0101085	-0.165273	0.0182101	-0.0248533	0.120363	0.0193007	-0.0439697	-0.162325	-0.236363	-0.190361	-0.00974294	-0.0967008	-0.172604	-0.0346746	-0.203741	-0.151397
visual_signal_transduction	0.133657	0.0592102	0.179642	0.119614	0.0126587	0.0830247	0.0375559	0.0413427	0.0758049	0.0923505	0.0509319	0.0582604	0.068534	0.148842	0.0345374	0.107193	0.0592172	0.0623001	0.0240997	0.0250261	0.00424499	0.0823536	0.00513141	0.0833563	0.11802	0.0862425	0.0838936	0.142329	0.124483	0.0905282	0.0601584	0.134112	0.0825755	0.0480186	0.0805403	0.0253539	0.110418	0.060338	0.150008	0.0923052	0.0609316	0.120486	0.0605361	0.0815795	0.0286418	0.0808696	0.021777	0.0307486	0.129333
Notch_signaling_pathway	0.133657	-0.0617543	-0.0896693	-0.0463982	-0.074563	-0.0753932	-0.045373	-0.0482899	-0.0649229	-0.061554	-0.0321065	-0.0360737	-0.0729173	-0.0835954	-0.0976465	-0.0699144	-0.101113	-0.0576222	-0.0672854	-0.0783335	-0.0804644	-0.0672152	-0.0244731	-0.0937877	-0.105687	-0.0770821	-0.0877605	-0.0307338	-0.0402151	-0.0695629	-0.0423358	-0.043094	-0.0706677	-0.0450217	-0.0860615	-0.11588	-0.0713965	-0.0579224	-0.0700316	-0.0259652	-0.0760595	-0.0564941	-0.119741	-0.0263585	-0.0851065	-0.0839681	-0.0693249	-0.0119091	-0.0970885
Internalization_of_ErbB1	0.133657	0.0757502	-0.0301923	0.0345242	0.0603346	0.0757099	0.0170319	0.0625854	0.0335169	0.0551498	0.046007	0.0501427	0.0371736	0.0638473	0.072888	0.0304014	-0.00427302	0.0427832	0.0310198	0.0903706	0.0463917	0.0299038	0.0920198	0.0243358	0.0487585	0.0743434	0.033895	0.122426	0.0308746	0.0513968	0.0523875	0.0705657	0.0977225	0.0528269	0.0204774	-0.00318221	0.0620614	0.103151	0.051817	0.0491485	-0.008351	-0.00791203	-0.039005	0.0622137	0.0264114	-0.0205016	0.090662	0.00796656	0.0372818
mechanism_of_gene_regulation_by_peroxisome_proliferators_via_ppara	0.133657	0.110502	0.123618	0.177348	0.179144	0.224257	0.197912	0.194685	0.20415	0.161177	0.184744	0.182519	0.170103	0.18568	0.200436	0.162637	0.203499	0.198344	0.210664	0.194943	0.182461	0.181648	0.201387	0.21672	0.168076	0.215408	0.171611	0.215808	0.195094	0.191387	0.257349	0.134595	0.255798	0.202582	0.271528	0.196998	0.169622	0.208992	0.122694	0.183071	0.14891	0.086069	0.226022	0.19199	0.182835	0.166587	0.17361	0.201789	0.220748
stathmin_and_breast_cancer_resistance_to_antimicrotubule_agents	0.133657	0.0456988	0.169612	-0.00508577	-0.0093857	0.000182856	-0.0402634	-0.0534451	-0.0165876	-0.0357731	-0.102633	-0.00930904	0.144607	0.0859049	-0.0261161	-0.08383	-0.0608824	-0.050605	0.020546	-0.0094193	0.158216	-0.0266779	-0.00619898	-0.0443568	-0.0118511	-0.0448634	-0.0182913	-0.075074	0.106335	-0.0402822	0.00318777	0.0785289	-0.0248443	-0.0859555	0.100204	-0.0185078	-0.0780396	-0.0188612	-0.0144961	-0.0369003	0.0919708	0.144813	0.160474	0.0153416	-0.0242357	-0.0135058	7.57e-05	0.117227	0.122367
G_alpha_(12/13)_signalling_events	0.133657	-0.0194509	0.00459314	0.0228261	0.0513236	-0.00401693	0.0259822	0.0737552	0.0167987	-0.00945066	0.0114177	0.0205413	0.0338559	-0.00364142	-0.000777616	0.0359882	-0.00700214	-0.0112167	0.0122354	0.0577809	0.0466812	0.0122319	0.00742073	-0.0141169	0.0326943	0.00391683	0.0232026	0.00392321	0.0251969	0.0314514	0.0623381	-0.001098	0.0161398	0.0756328	0.0862706	0.0454885	-0.00768273	0.0192949	0.0402033	0.013479	-0.0200931	-0.011817	-0.00717087	-0.0227539	0.0213245	0.00521721	-0.0045299	-0.00608986	0.0134056
G_alpha_(q)_signalling_events	0.133657	0.0401962	0.0499305	0.059852	0.0148209	0.0443133	0.00404135	-0.00861488	0.0265178	0.0310355	0.0285657	0.0444787	0.0312183	0.0774627	0.0403891	0.010619	0.0638358	0.0291347	0.0176082	0.00414444	0.0535705	0.0321652	0.0157448	0.063958	0.0579244	0.037975	0.010967	0.0183526	0.0868731	0.0629438	0.0174729	0.0336027	0.0226213	0.0681422	0.0486619	0.0189994	0.0151663	0.00804412	0.0340282	0.00363646	0.0384118	0.0879792	0.0723437	-0.0104022	0.0415773	0.0353667	-0.00572541	0.0545253	0.0568857
G_alpha_(z)_signalling_events	0.133657	0.0671438	-0.018309	-0.00733641	-0.0630509	-0.025934	-0.00107898	0.00986321	0.024618	-0.0859235	0.0032766	-0.039827	-0.0802767	-0.0203723	-0.00792123	-0.0312468	0.0124321	0.00453751	-0.0322958	-0.045389	-0.00265286	0.0327114	-0.018432	-0.0115565	0.0382207	0.00912471	0.0618122	0.0144028	0.0263341	-0.0179124	-0.0199146	0.0201717	-0.0299427	-0.0175502	0.0624238	0.0201955	-0.0542198	-0.0956581	0.0656439	-0.0169434	0.0341529	0.101912	0.0522749	0.0458458	0.0228964	-0.0194098	-0.0144213	0.0833871	-0.0296298
G_alpha_(i)_signalling_events	0.133657	0.0628616	0.0939364	0.0645113	0.0115404	0.0641424	0.0281097	0.0448204	0.0516287	0.0567404	0.0233033	0.0497141	0.0890989	0.0328348	0.0344778	0.0475022	0.0769135	0.0103345	0.0241915	0.0485894	0.119817	0.0860982	0.0363789	0.0826159	0.0697252	0.00585717	0.0311049	0.0328459	0.107447	0.0682801	0.0678652	0.0450633	0.0194882	0.0320261	0.122031	0.0513116	0.0292047	0.0310517	0.044919	0.0432343	0.120482	0.136259	0.153977	0.0515159	0.0442327	0.0296262	0.0424296	0.116427	0.0996535
Olfactory_Signaling_Pathway	0.133657	0.202654	0.204417	0.208944	0.208304	0.192722	0.221308	0.179597	0.201059	0.193499	0.198043	0.196949	0.16355	0.160236	0.170322	0.170739	0.16171	0.18688	0.195299	0.196609	0.129132	0.19216	0.188566	0.161547	0.189983	0.193102	0.191977	0.176204	0.13144	0.167507	0.194599	0.186795	0.219691	0.176312	0.0891723	0.198444	0.209184	0.181959	0.181146	0.185978	0.146249	0.128031	0.0759301	0.190414	0.199268	0.219129	0.207414	0.0592396	0.161505
G_beta_gamma_signalling_through_PLC_beta	0.133657	-0.0233191	0.104387	0.0266287	-0.0843547	-0.0664572	0.0216269	-0.0337346	0.0263888	-0.0197341	-0.0503253	-0.086262	0.0145323	0.0356655	-0.0704803	-0.0232636	0.00912282	-0.0875382	-0.110643	-0.0724565	-0.022107	0.0174041	-0.109267	-0.11601	0.146362	-0.0576056	0.0737539	0.0154945	0.00851632	0.0446703	-0.0591998	0.0596938	-0.0253115	-0.0176857	0.0270767	-0.0561265	0.00673789	-0.146643	-0.0201052	-0.0841165	-0.0358011	0.0199542	-0.0136189	-0.106029	-0.0442841	0.0271291	-0.0721229	-0.0771373	-0.0251615
G_beta_gamma_signalling_through_PI3Kgamma	0.133657	-0.013668	0.0545138	0.0285331	-0.0622332	-0.0855834	0.0286512	-0.0554431	-0.031093	-0.0549273	-0.0569645	-0.0338214	-0.0344076	-0.0312084	-0.0727968	-0.0751331	0.0267895	-0.117912	-0.0927694	-0.0593921	0.00286174	-0.0322423	-0.0961463	-0.0933833	0.0575844	-0.0583761	0.0170859	-0.00779408	0.0195341	-0.0357668	-0.0556323	-0.00210956	-0.0322982	-0.0666346	0.0984044	-0.0778099	-0.0379389	-0.158314	0.00346227	-0.124464	-0.0776012	-0.00732146	-0.0255538	-0.0887079	-0.0610214	0.0149155	-0.0732374	-0.0382133	-0.0701462
G-protein_activation	0.133657	0.0506063	0.0897687	0.0717283	0.0132617	0.0916311	0.14152	0.0891608	0.120867	0.0312714	0.0115013	0.0476966	-0.00393917	0.153964	-0.00404658	0.0619066	0.0739842	0.0481958	0.0242512	0.0571936	0.0213373	0.105325	0.0277166	0.0535727	0.224084	0.140497	0.16903	0.185269	0.162217	0.104387	0.138894	0.157237	0.0213135	0.153118	0.147746	0.106372	0.0523846	-0.0030866	0.0278595	0.00315725	0.108843	0.131238	0.0992451	0.0906646	0.0462354	0.0916495	0.122717	0.0243618	0.0896774
Opioid_Signalling	0.133657	0.114567	0.113695	0.123373	0.107094	0.222136	0.224231	0.0834993	0.226274	0.147058	0.0908508	0.194951	0.0644595	0.0644493	0.0828315	0.0849119	0.184294	0.207319	0.154386	0.104505	0.0401812	0.211536	0.198625	0.159635	0.0927754	0.165686	0.0874395	0.166698	0.11153	0.160612	0.0919062	0.0943134	0.120799	0.170512	0.110871	0.22294	0.117224	0.0878679	0.0824516	0.0876682	0.0572582	0.0889278	0.101267	0.0939702	0.102524	0.121737	0.115055	-0.0302113	0.187389
FOXA1_transcription_factor_network	0.133657	0.222054	0.229854	0.247166	0.269266	0.264042	0.251308	0.222181	0.267346	0.141084	0.203793	0.217663	0.209542	0.243895	0.248472	0.227063	0.26542	0.198362	0.275252	0.223655	0.220094	0.18418	0.244868	0.287439	0.223995	0.215738	0.148153	0.160765	0.252717	0.2624	0.236912	0.138814	0.219609	0.2377	0.25459	0.26407	0.155909	0.261912	0.228772	0.205665	0.221812	0.201529	0.282024	0.205276	0.203247	0.216571	0.196225	0.251412	0.252143
d4gdi_signaling_pathway	0.133657	-0.140338	0.00755967	-0.0124203	0.0165199	0.0399351	-0.0498845	-0.163316	-0.147562	-0.0536643	-0.137113	-0.163556	0.0304637	-0.0875414	0.0349626	0.149103	0.137195	0.0411474	-0.0960885	-0.0510213	0.192924	-0.0495539	-0.0833488	0.025339	-0.00160778	-0.0269143	0.0470779	0.0744966	0.0156718	-0.0842804	-0.0860087	-0.0901569	0.0464411	0.0995829	0.135177	-0.14936	-0.118998	0.0336513	-0.145242	0.0106679	0.0389679	-0.0407118	0.161023	-0.0897746	-0.149377	-0.137339	-0.0422886	0.146612	0.0792764
Glypican_3_network	0.133657	0.0960235	0.106494	0.220205	0.116304	-0.0471812	0.00626652	0.224943	0.0726664	0.281793	0.247455	0.140961	0.224134	0.159322	0.27127	0.220542	0.322489	0.237812	0.0197236	0.166331	0.237078	0.247271	0.220047	-0.037881	0.173489	-0.0536655	0.255876	-0.0126322	0.107187	0.128504	0.230015	0.144434	0.215407	0.187083	0.317173	0.229585	0.203898	0.148539	0.189063	0.270051	0.115066	0.307992	0.296476	0.240873	-0.0848863	0.261596	0.188628	0.27344	0.221383
role_of_egf_receptor_transactivation_by_gpcrs_in_cardiac_hypertrophy	0.133657	0.0336552	-0.00960576	0.0830289	-0.0126311	0.0316742	0.0552205	0.0375288	0.0145589	-0.00548172	0.0850914	0.0843144	0.0141755	0.0199323	0.0754929	0.0106692	0.047298	-0.0298648	0.062314	0.0235313	0.036771	0.0178772	0.0524285	0.028459	0.0773385	0.0341436	0.0300514	0.0741673	0.0445704	0.0751961	0.0561175	0.000192823	0.101256	0.0427774	0.0658693	0.0434629	0.0692347	0.0336109	0.045014	0.00713409	-0.0511811	0.0101685	-0.012614	0.0513407	0.0639929	0.0405011	0.0367688	0.0215953	0.0289126
fc_epsilon_receptor_i_signaling_in_mast_cells	0.133657	0.0222405	-0.0332312	-0.0102605	-0.0122726	0.0091531	-0.00991215	0.0115294	-0.0112186	0.0455131	-0.0165496	-0.0329873	-0.0229952	0.0128835	0.0353961	0.0206389	0.0372223	0.0286216	0.0180873	0.0295827	0.0509599	0.0236581	0.0367088	0.0525086	0.0465255	0.080767	-0.0294661	0.100727	0.0370115	0.0749455	0.00419523	0.0131459	0.0899957	0.0193155	0.131396	0.0177508	-0.00477236	0.0132235	-0.0254685	0.0921249	-0.0522072	0.0318437	0.0730824	0.0598824	-0.00758431	0.00734755	0.0531298	0.0728127	0.0296758
Plexin-D1_Signaling	0.133657	-0.044798	-0.072491	-0.00606354	-0.0597781	-0.0686748	-0.0912046	0.000575368	-0.00297856	-0.0553489	-0.028145	-0.0442432	-0.0272875	-0.034491	-0.0401177	0.0291132	0.0340943	-0.018237	0.0537594	-0.00304982	0.0329655	0.00901375	0.0263194	-0.0261078	-0.0549819	-0.050693	-0.00445978	0.0389472	0.0196984	0.0346691	0.029241	-0.0363922	-0.0485831	-0.0563544	0.0100516	-0.0338381	-0.0128638	0.00913239	0.0619042	-0.00586776	0.00482736	-0.0241082	0.0499376	0.0882912	-0.0588464	-0.00668218	-0.0135811	0.0624741	-0.0518487
regulation_of_ck1/cdk5_by_type_1_glutamate_receptors	0.133657	-0.0476346	0.0137733	-0.0455068	-0.0148988	0.0351955	-0.0554965	0.040312	0.000543212	-0.0225823	-0.0193788	0.0637325	-0.0149069	-0.0286125	0.0126307	-0.0769081	-0.0210228	-0.0436799	0.0310888	0.0334106	0.0169692	0.029876	0.032766	-0.0377496	0.0228412	-0.0741233	0.0406275	0.0124414	-0.0413722	0.129633	0.094746	0.00259436	0.0300157	-0.0242898	-0.019689	0.0425441	0.00354753	0.0260936	0.0474541	-0.0710664	-0.0104469	0.0144896	-0.0555325	0.0659217	-0.0372122	0.00319387	0.00402603	-0.0748751	0.00016038
C-MYC_pathway	0.133657	0.0856804	-0.0385205	0.0160488	0.0495804	0.00835264	-0.039883	-0.0627548	0.0381549	0.122504	-0.001041	0.00732513	0.0706034	0.0547331	-0.0291232	0.0598255	-0.0324235	0.130386	-0.0772559	-0.0516718	0.0474641	0.00800378	-0.00928492	0.0233148	0.126728	-0.00992256	0.0239115	0.0181861	0.0188073	0.0615923	0.0348709	0.203312	0.0949395	0.0130892	-0.0034006	-0.0707463	0.166398	0.0165378	0.0930367	0.102283	0.00707115	0.0587287	0.008708	0.0496819	0.042627	-0.0201754	0.0810701	-0.0454088	0.0203112
Beta-oxidation_of_very_long_chain_fatty_acids	0.133657	0.28442	0.398774	0.404685	0.447394	0.409875	0.409464	0.393686	0.409824	0.403811	0.428378	0.429354	0.424061	0.385566	0.387519	0.394149	0.390757	0.428994	0.400624	0.406278	0.388392	0.405507	0.40011	0.38094	0.43876	0.411469	0.437063	-0.0287298	0.374156	0.397541	0.433055	0.437115	0.420309	0.421953	0.334222	0.404942	0.442563	0.405867	0.401498	0.401652	0.380632	-0.0627534	0.319729	0.410132	0.408077	0.410903	0.405507	0.322401	0.384229
PPARA_Activates_Gene_Expression	0.133657	0.107933	0.103191	0.0956056	0.147601	0.170987	0.149677	0.166082	0.151718	0.176699	0.157161	0.160375	0.204388	0.152274	0.181956	0.152271	0.099648	0.193865	0.222757	0.153288	0.126802	0.161068	0.195553	0.167174	0.117507	0.159782	0.1332	0.215422	0.139006	0.173858	0.214272	0.17451	0.218533	0.177793	0.126693	0.179028	0.145906	0.145189	0.126888	0.15849	0.142973	0.08058	0.120983	0.192175	0.174315	0.161337	0.143698	0.0971968	0.123964
Beta-oxidation_of_pristanoyl-CoA	0.133657	0.28442	0.398774	0.404685	0.447394	0.409875	0.409464	0.393686	0.409824	0.403811	0.428378	0.429354	0.424061	0.385566	0.387519	0.394149	0.390757	0.428994	0.400624	0.406278	0.388392	0.405507	0.40011	0.38094	0.43876	0.411469	0.437063	-0.0287298	0.374156	0.397541	0.433055	0.437115	0.420309	0.421953	0.334222	0.404942	0.442563	0.405867	0.401498	0.401652	0.380632	-0.0627534	0.319729	0.410132	0.408077	0.410903	0.405507	0.322401	0.384229
Synthesis_of_Ketone_Bodies	0.133657	0.491223	0.490876	0.492279	0.489733	0.491629	0.492126	0.492127	0.491595	0.491114	0.491185	0.491425	0.490568	0.486645	0.487503	0.488888	0.485772	0.489281	0.4918	0.491047	0.482823	0.491902	0.492194	0.482706	0.492708	0.491835	0.487424	0.485276	0.484096	0.490996	0.490345	0.491166	0.491218	0.490294	0.468927	0.492863	0.494507	0.492109	0.491149	0.493051	0.487813	0.486661	0.467805	0.493222	0.49365	0.493547	0.493479	0.472024	0.48973
Utilization_of_Ketone_Bodies	0.133657	0.488076	0.488948	0.4909	0.486534	0.489873	0.490438	0.489976	0.489744	0.49067	0.489051	0.489385	0.488511	0.484348	0.484965	0.486814	0.483295	0.48851	0.490129	0.489333	0.482191	0.491209	0.490592	0.479877	0.491414	0.489975	0.483246	0.479809	0.481087	0.489154	0.488229	0.489847	0.48959	0.488357	0.464028	0.491235	0.493213	0.490362	0.490284	0.491749	0.484941	0.485762	0.461901	0.49162	0.492211	0.492134	0.491903	0.465758	0.487252
Regulation_of_Lipid_Metabolism_by_Peroxisome_proliferator-activated_receptor_alpha_(PPARalpha)	0.133657	-0.0518455	-0.00477636	-0.0360106	-0.0195545	0.102038	-0.0147092	0.13426	0.0400422	0.0314367	0.0832952	0.0807732	0.086105	-0.0121482	0.0920116	-0.00632231	0.0592119	0.160036	0.17598	0.0572594	0.0778086	0.0273287	0.100897	0.126749	0.00801581	0.0729768	0.0554117	0.146035	0.0373919	0.0462658	0.195244	0.0189964	0.158419	0.0941452	0.12441	0.0169721	0.0896958	0.095201	0.0172785	0.128364	0.0419675	-0.0164764	0.078371	0.133148	0.150583	0.0165496	0.0959629	0.029434	-0.00604924
DAP12_signaling	0.133657	0.115439	0.184236	0.0701525	0.0716845	0.062061	0.0413047	0.0350361	0.0758694	-0.0430345	-0.00470983	0.0185013	0.139568	0.0682484	0.0473268	0.0388526	-0.00849976	0.0032789	-0.0114409	0.0571938	0.168602	0.0122368	0.0444003	0.0591513	0.129613	0.0572691	0.0269804	0.0345116	0.226607	0.0472449	-0.0002121	0.0649391	0.0431911	0.0134806	0.175817	0.0489128	0.0738146	0.0742945	-0.0157875	-0.0191481	0.107463	0.129327	0.148647	-0.0121872	0.0185607	0.00234727	0.0949172	0.154789	0.129762
DAP12_interactions	0.133657	0.110858	0.243712	0.0590643	0.0246398	0.0910491	0.108207	0.0568484	-0.00758909	-0.109007	-0.119787	-0.0714385	0.115114	0.00762683	0.0370803	0.139035	0.0837277	-0.0630734	0.0636045	0.0468421	0.1958	-0.0724162	-0.0908358	0.142423	0.190297	0.0304908	-0.010977	-0.0805466	0.301536	0.0107345	-0.0400405	0.14609	-0.0594183	-0.122008	0.275369	0.0200329	-0.0129932	-0.108586	-0.021655	-0.116024	0.12359	0.248073	0.28001	-0.0701371	0.0309039	-0.043065	0.0314486	0.199192	0.248559
Role_of_phospholipids_in_phagocytosis	0.133657	0.173896	0.186197	0.169742	0.174803	0.174457	0.167182	0.133364	0.16883	0.134803	0.150701	0.149131	0.142251	0.124837	0.134113	0.140126	0.134321	0.14481	0.131702	0.168386	0.124449	0.162092	0.143189	0.13031	0.158629	0.162641	0.127251	0.127791	0.115613	0.124713	0.14277	0.154774	0.172697	0.13011	0.0889989	0.159487	0.162303	0.145452	0.127143	0.144026	0.131496	0.117447	0.0887063	0.146233	0.153673	0.165902	0.174267	0.0773735	0.126091
ATP_sensitive_Potassium_channels	0.133657	0.065278	0.166807	0.168845	0.390433	0.166996	0.170758	0.270983	0.166958	0.161925	0.159203	0.159805	0.120191	0.119394	0.152073	0.126866	0.153324	0.156883	0.335411	0.166215	0.278229	0.42173	0.160954	0.147702	0.276995	0.165937	0.25076	0.161109	0.137015	0.357522	0.161179	0.135356	0.151809	0.152821	0.116014	0.283555	0.176593	0.276201	-0.000764287	0.417611	0.145795	0.179243	0.267744	-0.0723035	0.167022	0.232462	0.16501	0.107252	0.262501
Classical_Kir_channels	0.133657	-0.0683791	-0.0957986	-0.0797039	0.103425	-0.153374	-0.065739	-0.084687	-0.0728686	-0.322329	-0.0904718	0.128998	-0.102757	-0.102896	0.111917	-0.0897627	-0.0976488	-0.159764	-0.0864625	-0.0827217	0.0763447	-0.0831231	-0.0908371	0.0146178	-0.109498	0.095557	-0.113379	0.0820241	0.0758748	0.112679	0.0962306	-0.148398	-0.0728124	-0.0834481	-0.221811	-0.0850282	0.14345	-0.0918526	-0.0913841	-0.0157863	-0.105178	-0.113751	-0.13905	0.0918284	0.134347	-0.0744699	-0.082553	-0.0490047	-0.100163
Voltage_gated_Potassium_channels	0.133657	-0.0469472	-0.119674	-0.0801983	-0.0302834	-0.0868982	-0.144156	-0.0569159	-0.0718197	-0.15508	-0.00939854	0.000720563	-0.153804	-0.205435	-0.116068	-0.0503976	-0.00965518	-0.104107	-0.0366326	-0.0887557	-0.0329378	-0.101416	-0.0750247	-0.10363	-0.00958073	0.0276329	-0.0344841	-0.0916085	-0.104765	0.0317272	-0.0773644	-0.100035	-0.12046	-0.0294513	-0.106327	-0.0454862	-0.115505	-0.0881623	0.0690431	-0.104302	-0.0552261	-0.0225194	0.0406455	-0.0545395	-0.0501025	-0.148532	-0.140925	0.0910726	-0.0754075
FCGR_activation	0.133657	0.175348	0.210915	0.175937	0.165248	0.167988	0.169445	0.128644	0.167717	0.134888	0.132461	0.140962	0.155118	0.114359	0.119302	0.140815	0.117095	0.126835	0.140123	0.1565	0.135488	0.151412	0.130219	0.135965	0.147687	0.140226	0.128339	0.113985	0.117727	0.112276	0.132528	0.154562	0.164769	0.114638	0.0936457	0.154793	0.159411	0.128897	0.121868	0.143304	0.145154	0.123638	0.111927	0.133978	0.142378	0.161174	0.185155	0.0899565	0.143304
STING_mediated_induction_of_type_1_IFN	0.133657	0.0683269	0.00525492	0.00357118	0.0267994	-0.102072	0.0225483	-0.084937	-0.0151006	0.0278057	-0.0320477	-0.074627	0.0807378	0.0373525	0.0384603	0.0359136	-0.089692	0.0285766	0.0589613	-0.0681207	-0.0661612	0.0103212	-0.136268	-0.108471	0.0135632	0.0323848	0.0287	-0.0144565	-0.0343073	0.0715589	-0.08301	0.0563724	-0.100469	-0.0882802	-0.140161	0.0514205	-0.0872528	-0.129539	-0.119379	0.0199798	0.00109573	-0.0265719	-0.0640255	0.0769551	-0.0681488	0.0334285	-0.0389252	-0.191972	-0.0224893
RIP-mediated_NFkB_activation_via_DAI	0.133657	0.0207112	0.181653	0.128646	0.105893	0.0774794	0.0387231	0.082171	0.0633211	0.0460024	0.0381743	0.0748722	0.112339	0.139167	0.0178069	0.0118974	0.0735508	0.0520425	0.154907	0.0155754	0.135903	0.104391	-0.023455	0.121691	0.102806	0.0704156	0.084133	0.0528311	0.111972	0.0748125	0.138212	-0.00810975	-0.0230422	0.0170746	0.123513	0.0630246	0.0149626	-0.0130014	-0.0462794	0.0436618	0.0538961	0.144628	0.145987	-0.0225637	0.126768	0.0678356	0.0115544	0.0687017	0.019387
classical_complement_pathway	0.133657	0.362267	0.363424	0.303973	0.335154	0.404928	0.35612	0.323174	0.406185	0.249024	0.327046	0.384004	0.39201	0.317904	0.318497	0.395785	0.387061	0.252657	0.328226	0.331431	0.339753	0.255303	0.272941	0.381203	0.388854	0.339597	0.241869	0.285466	0.379431	0.362802	0.327022	0.359999	0.3252	0.31608	0.350526	0.292829	0.300796	0.296532	0.292662	0.247822	0.392053	0.335616	0.340747	0.340759	0.284621	0.290758	0.406096	0.34289	0.393962
GPVI-mediated_activation_cascade	0.133657	0.0229034	0.129649	0.0461811	-0.0359826	-0.0685129	-0.0412304	-0.0494014	-0.0646382	-0.078144	-0.0687279	-0.047471	0.0377746	-0.0476579	-0.0551614	-0.0175127	-0.0751352	-0.020709	-0.082991	-0.0429001	0.0506774	1.24e-05	-0.0499668	-0.0192972	-0.0326729	-0.0507721	-0.012848	-0.0812648	0.106243	-0.0926958	-0.0492437	0.0435657	-0.0376013	-0.0915267	0.126989	-0.00450619	-0.067289	-0.0589814	-0.0769315	-0.0223589	0.00567482	0.0961399	0.106448	-0.0605879	-0.0836804	-0.00466229	-0.0374423	0.0465371	0.0383213
Platelet_Aggregation_(Plug_Formation)	0.133657	0.397326	0.26818	0.0849129	0.246249	0.374232	0.262801	0.218922	0.245032	0.0730054	0.20325	0.368028	0.196361	0.261922	0.0617208	0.186369	0.282288	0.099832	0.361864	0.283731	0.324871	0.0785961	0.0676066	0.368817	0.25737	0.197047	0.143945	0.351192	0.249599	0.271184	0.0715334	0.196044	0.263186	0.408567	0.218318	0.182446	0.207571	0.2534	0.204955	0.0728713	0.272502	0.159192	0.328706	0.286857	0.299086	0.111583	0.202349	0.267611	0.134602
Thromboxane_signalling_through_TP_receptor	0.133657	0.0266495	0.101499	0.0684708	-0.015098	0.0409928	0.0692758	0.0411723	0.0554321	-0.104429	0.028075	0.0229913	-0.00114032	0.0360566	0.0354	0.0194068	0.032013	-0.086339	-0.0313983	-0.0442044	0.0676071	0.0148885	-0.106137	0.0182027	0.0959347	-0.0470738	0.041424	-0.013266	0.0640174	0.0691237	0.0429209	0.013624	0.0577799	0.0370152	0.068254	0.0114559	-0.00739451	-0.0657993	0.0511575	-0.156472	-0.0203001	0.0348661	-0.00739965	-0.0574042	0.0697513	0.0348632	-0.111985	-0.0532076	0.0146471
Phenylalanine_and_tyrosine_catabolism	0.133657	0.460485	0.482087	0.484967	0.48733	0.483757	0.486147	0.482553	0.483988	0.453958	0.481858	0.481834	0.479573	0.477462	0.476309	0.479983	0.476485	0.447466	0.484298	0.482524	0.442934	0.453391	0.483451	0.47479	0.485532	0.484323	0.483219	0.45339	0.474868	0.465444	0.481806	0.452078	0.482937	0.478315	0.453646	0.484068	0.457163	0.46128	0.45442	0.457698	0.474588	0.448738	0.447762	0.485377	0.486919	0.457551	0.483375	0.449153	0.478776
Processing_of_Intronless_Pre-mRNAs	0.133657	-0.0146683	-0.0264765	0.0448242	0.038562	-0.0207659	-0.0439663	0.0325102	-0.0662811	0.0833102	0.0258761	0.0178895	-0.0444016	-0.0227034	0.0191269	-0.072038	-0.112323	0.0350797	0.0130795	-0.048725	-0.0829132	0.00653273	0.0862527	-0.0347685	0.0577975	0.0448033	-0.0203794	0.0280438	-0.0102042	0.0641582	0.00986863	0.0300279	-0.0521553	0.0288121	-0.147881	-0.0379923	0.0120548	-0.034083	-0.026977	0.0972764	-0.0492279	-0.00613948	-0.149339	0.0459391	0.0167965	-0.0193501	0.0823691	-0.148341	-0.0181972
Urea_synthesis	0.133657	-0.0326088	0.341701	-0.0268767	-0.175102	-0.00457255	-0.00791222	-0.0603124	0.201932	-0.06242	-0.0578192	-0.196114	-0.0829529	0.396417	-0.0680467	0.405705	0.172772	0.406369	-0.182116	-0.0414751	0.374752	-0.189283	-0.0597212	0.46848	-0.0545813	-0.167422	-0.206657	-0.163849	-0.211236	-0.0484923	-0.0608278	0.180713	-0.0890923	-0.216424	0.460924	-0.0386744	-0.183555	-0.0608001	-0.211891	-0.0649123	0.146993	0.409246	0.456279	-0.0577171	-0.188617	-0.168726	-0.180441	0.454131	-0.183353
Carnitine_synthesis	0.133657	0.430013	0.143838	0.400122	0.406225	0.417326	0.424178	0.420307	0.425016	0.420894	0.393367	0.413256	0.404593	0.37075	0.403694	0.388153	0.399058	0.120196	0.41728	0.414322	0.38023	0.422617	0.415975	0.390561	0.412246	0.428675	0.386845	0.4213	0.355119	0.379461	0.397542	0.273649	0.415291	0.384191	0.346027	0.421524	0.428312	0.422344	0.395939	0.418528	0.39748	0.252039	0.331976	0.424215	0.423134	0.427454	0.419457	0.344417	0.403033
Creatine_metabolism	0.133657	-0.262708	0.0764526	-0.0133626	-0.299115	-0.305136	-0.298933	-0.326539	0.0689513	-0.295214	0.0586578	-0.318925	0.0490288	-0.314303	-0.328583	-0.323334	-0.315281	-0.341703	0.0343664	-0.297557	-0.359808	-0.303604	-0.31598	-0.328145	-0.349045	0.0661544	-0.0439304	-0.384566	-0.340963	0.0531012	-0.318906	0.0668876	-0.36173	-0.0511104	-0.346134	-0.0221645	-0.0132643	-0.313744	0.0518154	-0.316571	-0.318172	-0.0350023	-0.073336	0.0623076	-0.308713	-0.299084	-0.31135	0.18933	-0.322138
Metabolism_of_polyamines	0.133657	0.448987	-0.394149	-0.401447	-0.382431	-0.407511	-0.407614	-0.419178	-0.405456	-0.402063	-0.416248	0.301432	0.271417	-0.414398	-0.419229	0.468877	0.43069	-0.405404	-0.403708	-0.401138	-0.388495	0.444824	-0.411931	-0.419229	0.476535	-0.310426	0.290947	0.273062	0.226395	0.270698	-0.414604	0.471961	-0.442717	-0.359406	-0.422878	-0.40304	0.321168	0.443436	-0.384846	-0.403091	0.26268	-0.466718	-0.417276	-0.417996	-0.406175	0.317981	-0.318135	-0.422981	-0.413422
Interconversion_of_polyamines	0.133657	0.389163	0.437012	0.440096	-0.456234	0.442049	0.312996	0.465228	0.441175	-0.465588	0.286579	0.292438	0.425808	0.426939	0.366549	0.429868	0.428172	-0.400367	-0.472063	0.439942	0.424677	0.441895	0.377959	0.260676	0.281799	0.293363	-0.385463	-0.446572	0.342599	0.261806	-0.406792	0.376726	-0.356887	-0.412137	0.380221	0.383356	0.443796	0.282364	0.277533	0.283598	0.417893	-0.397335	0.369119	-0.409207	0.387827	0.446006	0.304464	0.162768	0.424472
Transport_of_the_SLBP_Dependant_Mature_mRNA	0.133657	-0.038183	-0.139388	-0.0898573	-0.0966052	-0.0875739	-0.0849594	-0.0068043	-0.0866244	0.116899	-0.0251331	-0.000521572	-0.029011	-0.0161438	-0.0444854	-0.0524976	-0.0980174	0.0528077	-0.0409842	-0.0602097	-0.068609	-0.0441869	-0.000621862	-0.0337162	-0.0587066	0.0647407	-0.0718801	0.049475	-0.0876059	-0.0950389	0.0781468	0.0370711	-0.0293808	-0.02927	-0.131522	-0.0166107	0.0885322	0.0390446	-0.02172	0.0619073	-0.110827	-0.0297382	-0.163546	0.0306555	-0.00692829	-0.00374316	0.0239035	-0.160562	-0.0604485
Fructose_catabolism	0.133657	0.494472	0.493418	0.494035	0.495268	0.493932	0.494164	0.494523	0.494164	0.493778	0.49401	0.494164	0.493444	0.489512	0.490541	0.491311	0.48905	0.493187	0.493855	0.493624	0.481752	0.495268	0.494317	0.486275	0.494446	0.493701	0.494446	0.490669	0.488279	0.490027	0.493033	0.492519	0.490515	0.491799	0.475228	0.495011	0.496065	0.49162	0.491106	0.494523	0.49126	0.491234	0.475254	0.4955	0.4955	0.495243	0.495731	0.479082	0.492416
Galactose_catabolism	0.133657	0.0927749	0.0485429	0.0523655	0.359784	0.389303	0.0584918	0.0788776	0.0537233	-0.209351	0.317841	0.32264	0.298778	0.364377	0.0437626	0.0369706	0.03389	-0.211934	0.0467743	0.327075	0.073806	-0.194461	0.0415045	0.296658	0.0403725	0.324887	-0.208082	-0.195221	0.365207	0.37103	0.0446197	0.0515172	0.378641	0.0719833	0.013634	0.0489893	0.111075	-0.209545	-0.217679	0.0156215	0.0657165	0.0115033	0.252099	0.390227	0.329345	0.0556826	0.0553288	0.0222119	0.0298418
GP1b-IX-V_activation_signalling	0.133657	0.062836	0.00751228	0.0584925	0.00130571	0.151742	0.0158021	0.0802481	0.12977	-0.0137197	0.0825331	0.236225	0.100195	0.0484267	0.0124946	-0.0205528	0.107801	-0.0265786	0.19301	0.157132	0.143836	0.0215446	0.048788	0.169771	0.0940282	0.0528075	0.0285777	0.209207	0.0850342	0.0713551	0.000942258	-0.0360004	0.122965	0.228697	0.0557831	0.0772661	0.0706772	0.132045	0.0441192	-0.0479391	0.0736465	0.00586292	0.116539	0.115813	0.145585	0.0332996	0.040548	0.138	0.0574708
Glycolysis	0.133657	0.0111943	0.125459	0.0407133	0.0629221	0.0631769	0.083463	0.0226046	0.0498889	0.0465448	0.0362874	0.0575311	0.0440412	0.0494653	0.0237543	0.116977	0.0666988	0.0935394	-0.0263461	0.0918807	-0.0257452	0.079634	0.030073	0.0103207	0.0438891	0.0186054	0.0503555	0.0873138	-0.00435987	0.0764666	0.0439241	0.151802	0.10038	0.00606891	0.00414481	0.00553742	0.00576745	0.0693866	0.0532846	0.0585396	0.0216529	0.0183413	0.0215847	0.0422434	0.0386581	0.0702256	-0.00925906	-0.0369865	0.0498526
Gluconeogenesis	0.133657	0.115909	0.256943	0.176746	0.174001	0.229185	0.222305	0.0808961	0.183398	0.0502823	0.117546	0.187473	0.167427	0.127335	0.15205	0.201967	0.177057	0.142618	0.072647	0.178573	0.127551	0.156229	0.108598	0.137426	0.199014	0.100065	0.187114	0.193748	0.10705	0.187724	0.168705	0.249929	0.19454	0.122035	0.108895	0.0739146	0.120368	0.200383	0.145254	0.114419	0.111449	0.0880091	0.0872959	0.207702	0.175247	0.175847	0.177979	0.0861682	0.15345
Glycogen_synthesis	0.133657	0.101392	0.0659814	0.0993858	0.153319	0.167302	0.123176	0.0786756	0.0982174	0.0322302	0.146024	0.165013	0.125734	0.140826	0.0698483	0.0822203	0.0817144	0.0607893	0.077298	0.152458	0.0622511	0.0551058	0.0746996	0.131565	0.0758348	0.136228	0.040811	0.0333789	0.0562057	0.130916	0.0910642	0.204788	0.163199	0.093032	0.0471298	0.0798642	0.0838351	0.0333836	0.0608967	0.0529423	0.0828385	-0.0203165	0.087336	0.170125	0.137262	0.102714	0.0877103	0.0365907	0.0810413
Glycogen_breakdown_(glycogenolysis)	0.133657	0.0485945	0.0411017	0.0480811	0.139507	0.166928	0.0561606	0.0214779	0.094559	-0.0495484	0.0757358	0.0798495	0.0622747	0.114604	0.0524291	0.0208565	0.0742442	-0.0458504	0.0725889	0.0809617	0.02162	-0.0231292	0.0176743	0.0928556	0.00239745	0.0675585	-0.0190924	-0.0136814	-0.00888872	0.0805452	0.0197506	0.143507	0.0951747	0.0556548	-0.00988348	0.0913459	0.0233341	-0.0291264	0.014545	0.0048301	0.0626606	-0.0268978	0.0889103	0.0886143	0.0703488	0.000143279	0.0560346	0.0740053	0.00440027
Arf6_signaling_events	0.133657	0.0254325	0.049884	-0.0502891	0.0165102	0.0299272	-0.0284468	-0.0210356	-0.00331262	0.00283834	-0.0366551	0.0237369	0.037454	0.0320109	-0.0301121	0.0128117	0.0268763	0.0108459	-0.00692251	0.0126875	0.0470644	-0.0129113	-0.0368311	0.0338606	0.0124003	-0.001692	-0.0326458	-0.00798656	0.054964	0.028173	-0.0222428	-0.0146182	0.0284126	0.0145013	0.00644425	-0.0337303	-0.0156219	0.0380196	-0.0066575	-0.0113866	0.0206601	0.0857355	0.0759189	0.0166626	-0.00814952	-0.0383152	0.0356617	0.0764941	0.0203194
IL4-mediated_signaling_events	0.133657	-0.00259389	0.0368287	-0.00412678	-0.0368948	-0.0158762	-0.0299403	-0.0144692	0.0266207	-0.00461036	-0.0714616	-0.0139009	0.0207189	0.0312636	-0.0316384	-0.0204296	0.00567881	-0.0159914	-0.00935972	-0.0319816	0.0750261	0.00239114	-0.0235596	0.0554287	-0.0437269	-0.0054859	-0.0396291	-0.0217697	0.0362398	-0.0101222	-0.0224503	0.0344472	-0.0281334	0.00734839	0.122493	-0.0407338	-0.0458527	0.00717907	-0.00648133	0.00501611	0.0157358	0.14007	0.2189	-0.0167989	-0.0242984	-0.0614511	-0.00790032	0.149683	-0.00646725
Fatty_Acyl-CoA_Biosynthesis	0.133657	-0.319676	-0.318691	-0.257325	0.0138048	0.13438	-0.103912	0.13532	0.0529771	0.112854	0.360049	0.0194035	-0.0954813	0.00404086	0.0103723	0.371934	-0.336709	0.140079	0.117986	0.122198	0.0561337	-0.133987	-0.0625364	-0.00165	-0.319052	0.00864559	0.182182	0.406402	0.102113	0.0444753	0.186708	-0.0815721	0.265295	0.035179	-0.350391	-0.270076	0.0262835	0.00150972	0.142099	0.12307	-0.347409	-0.358248	-0.172782	0.255331	0.0170369	-0.111256	-0.317	-0.0463311	-0.00234937
Notch-mediated_HES/HEY_network	0.133657	-0.0164006	-0.091561	-0.00081056	-0.139612	-0.0340559	0.0153242	-0.0244261	-0.0539006	-0.0595977	-0.073131	-0.0456792	-0.0647797	-0.0120793	-0.0589592	-0.0380268	0.00363907	-0.01099	-0.0614999	-0.0668091	0.0400967	-0.0528444	-0.0915398	0.00704261	-0.0393517	-0.0823728	-0.00266226	0.00387844	-0.0138275	-0.0315729	-0.0136989	-0.0754513	-0.0681922	-0.0239965	0.0863186	-0.0984688	-0.150704	-0.0347599	-0.058554	-0.0437951	-0.0212677	-0.000484037	-0.0250093	-0.0542204	-0.0667942	-0.0128764	-0.155918	-0.00747611	-0.0458881
Regulation_of_retinoblastoma_protein	0.133657	-0.0455099	-0.0475783	-0.0394258	-0.0531366	-0.00869845	-0.0868396	0.0107887	-0.0340051	0.00628012	-0.0150185	-0.065396	-0.0479098	0.034953	0.000381558	-0.0410311	-0.0162555	-0.0169474	0.0350289	-0.0879482	-0.0167126	-0.0846355	-0.0129015	-0.00946828	0.0283261	0.0226556	-0.000781017	-0.0345041	-0.0432514	0.0214302	-0.0429132	0.0413908	0.0166378	0.0129796	-0.012175	-0.0195209	-0.0221139	-0.0288378	-0.0124399	0.00591075	-0.0523692	0.0324361	-0.0296954	-0.0231715	-0.0606614	-0.0356516	-0.0480077	-0.00968876	-0.0365873
the_prc2_complex_sets_long-term_gene_silencing_through_modification_of_histone_tails	0.133657	0.0591141	-0.0125222	0.0107699	0.0177185	-0.00771943	0.0784683	0.0757512	-0.0122168	0.0836595	0.0181403	-0.077833	0.0581573	0.113486	-0.0128139	-0.0255696	-0.0704945	0.00400223	0.0423035	-0.0842776	-0.0394767	0.010597	0.0453437	-0.0602233	0.0876679	0.0992506	0.12635	0.0651857	0.0265617	0.0371359	0.0830554	0.159339	0.0919386	0.0601769	-0.00670982	0.000734244	0.0907897	0.00364033	0.116664	0.0375315	-0.0911053	0.0815339	-0.153433	0.0871349	0.0494264	0.114965	0.033641	-0.0388654	-0.00575957
Alternative_NF-kappaB_pathway	0.133657	0.0347247	0.114025	-0.0343634	-0.0789505	-0.0753162	0.0898388	0.101237	-0.0457883	0.201117	-0.0359877	-0.0537895	0.116573	-0.106237	0.00556403	0.176574	-0.0952395	0.241445	-0.115886	-0.0986597	0.0230037	0.251627	-0.0131547	-0.0805576	0.178861	-0.105408	0.0507871	0.0799485	-0.0204377	-0.019104	0.102388	0.174225	-0.0711101	-0.120844	0.208946	0.140941	-0.0512905	-0.030839	-0.0284619	0.0417643	0.0582836	0.195536	0.0861099	0.00899709	-0.0194801	0.180156	-0.109712	0.0628397	-0.0849627
Axonal_growth_inhibition_(RHOA_activation)	0.133657	-0.082213	0.0148689	0.0274006	0.0418555	0.124524	0.0328631	-0.00965179	0.0997696	0.0999271	0.0189416	0.00799276	-0.025486	0.0437266	0.0107493	0.0419522	-0.0886686	-0.00243788	-0.0611945	-0.0361752	0.0692657	0.014383	-0.056468	0.0445851	-0.012133	0.100761	-0.00807473	0.0462128	-0.0204193	0.0464489	-0.0474294	-0.0580061	0.0497463	0.102526	-0.13227	-0.0509491	-0.0445937	-0.053254	0.0764491	0.0704923	-0.0461293	0.00141302	-0.0279144	0.00858215	-0.0413059	0.00841302	-0.0258439	0.107004	0.0593142
Regulated_proteolysis_of_p75NTR	0.133657	0.0606582	0.123742	0.140064	0.151409	0.164437	0.127612	0.089184	0.0133841	0.11584	0.141462	0.12274	0.134925	0.0654702	0.0205024	0.157731	0.0994946	0.0805405	0.104892	0.00933607	0.0873198	0.182231	0.118187	-0.00997281	0.0798367	0.174862	0.129956	0.157135	0.0841381	0.177969	0.149781	0.0893434	0.160241	0.0545234	0.0176704	0.164936	0.0456288	0.113834	0.0775897	0.175353	0.101212	0.154803	0.0857799	0.128456	0.127648	0.151888	0.139163	0.0938728	0.116166
Axonal_growth_stimulation	0.133657	0.143554	0.0595537	0.142992	-0.0293126	0.248333	0.239453	0.128194	0.252194	0.0676603	0.225635	-0.0743499	0.108415	0.214131	0.134154	0.211798	0.0873534	0.18009	-0.0716589	-0.0450699	0.186861	0.192736	0.129053	0.172098	0.197937	0.0876233	0.196673	0.118004	0.131465	0.124163	-0.041988	-0.0721632	0.0705286	0.0493944	0.0435375	0.210198	0.15925	0.0582558	0.267665	0.1581	0.0106548	0.195256	0.143265	-0.0385819	-0.0681922	0.162824	-0.0250644	0.142027	0.181632
NF-kB_is_activated_and_signals_survival	0.133657	0.139464	0.164878	0.183646	0.149735	0.198005	0.21655	0.12875	0.182537	0.0837868	0.142857	0.095576	0.115158	0.166808	0.0911757	0.177583	0.128707	0.166662	0.130984	0.031842	0.116141	0.183597	0.0623728	0.182679	0.19291	0.163353	0.143967	0.0877336	0.111702	0.167353	0.0777131	0.002169	0.0473522	0.107588	0.173697	0.210083	0.204113	0.0982459	0.168262	0.158661	0.159593	0.192007	0.122976	0.134547	0.15236	0.150728	0.0822704	0.112849	0.170215
Ceramide_signalling	0.133657	0.326903	0.0236765	0.164103	-0.256451	0.160977	0.243542	-0.0687637	0.162533	-0.274556	0.0512677	-0.269855	-0.0823074	0.285081	0.130181	0.0495018	0.212649	0.201058	-0.262016	-0.199038	0.107246	0.239208	0.0415403	0.0356591	0.0539159	-0.228425	0.0491098	-0.0701632	-0.00982393	0.104276	-0.255166	0.0157823	-0.240616	-0.280501	0.100216	0.234986	-0.0496129	-0.0655295	0.130614	-0.0659876	0.18344	0.301976	0.223533	-0.256301	-0.260858	-0.0419285	-0.262213	0.097158	0.0437364
p75NTR_recruits_signalling_complexes	0.133657	0.132098	0.116738	0.0956599	0.125064	0.178828	0.132363	0.125883	0.155541	0.0780954	0.091243	0.0993946	0.0822656	0.111939	0.140781	0.182904	0.108062	0.16885	0.128559	-0.0274296	0.0815407	0.117044	0.121106	0.141138	0.164051	0.139538	0.15682	0.132953	0.0751781	0.150249	0.0645497	0.122818	-0.0297905	0.0967528	0.109032	0.140865	0.201735	0.0628146	0.0836715	0.139769	0.0656918	0.0851211	0.0464508	0.115493	0.155223	0.0734317	0.13407	0.109966	0.114339
Syndecan-4-mediated_signaling_events	0.133657	0.103108	0.105942	0.149618	0.105792	0.132925	0.163049	0.14352	0.096059	0.117984	0.14441	0.128343	0.105555	0.0694292	0.0966667	0.162829	0.103963	0.1736	0.114314	0.140528	0.128657	0.144956	0.104423	0.130356	0.136183	0.0916727	0.180259	0.112861	0.101191	0.161803	0.185815	0.13056	0.124993	0.0723712	0.177215	0.0665447	0.145048	0.134105	0.142362	0.18575	0.133558	0.171482	0.148182	0.089755	0.121507	0.123263	0.0734705	0.102542	0.130818
mechanisms_of_transcriptional_repression_by_dna_methylation	0.133657	-0.223787	-0.209862	-0.161154	-0.213455	-0.18568	-0.108284	-0.0412364	-0.12422	-0.125883	-0.195792	-0.180933	-0.056898	-0.0920242	-0.143207	-0.185249	-0.184145	-0.0491644	-0.0998451	-0.221622	-0.156845	-0.161932	-0.08715	-0.198554	-0.0472959	0.00161357	-0.0590749	-0.285481	-0.171152	-0.0992195	-0.112149	-0.0014773	-0.221573	-0.182393	-0.171416	-0.132313	-0.081274	-0.226706	-0.0401079	-0.121905	-0.112459	-0.183917	-0.166619	-0.085705	-0.0862875	-0.095415	-0.17322	-0.114305	-0.0946163
srebp_control_of_lipid_synthesis	0.133657	0.0829788	0.0596659	0.142655	0.333475	0.436818	0.432663	0.386325	0.344303	0.431445	0.464888	0.395456	0.402594	0.264738	0.351904	0.359717	0.196692	0.372602	0.35655	0.424161	0.270531	0.422938	0.391979	0.258529	-0.0953292	0.415547	0.223161	0.427146	0.373323	0.357893	0.420113	0.287833	0.357833	0.414538	0.261618	0.440244	0.360757	-0.074389	0.33288	0.44801	0.422649	-0.147672	0.303661	0.474249	0.361801	0.403653	0.118054	0.283161	0.34683
Regulation_of_cytoplasmic_and_nuclear_SMAD2/3_signaling	0.133657	-0.0165432	-0.163338	-0.0671111	-0.06822	-0.114505	-0.0622538	0.145206	-0.0677092	0.219348	-0.00945685	-0.0188361	-0.00153647	-0.0154936	0.0578389	-0.110538	7.63e-05	0.161255	0.010667	-0.046094	-0.130106	-0.0398691	0.0997588	0.0483802	-0.0244207	0.162129	-0.0765458	0.0276429	-0.0843667	0.0160917	0.0766853	0.0460361	0.017607	-0.059451	0.0111828	-0.0832817	0.0586352	0.026124	0.00211167	0.123056	-0.041005	0.00316199	-0.0427565	0.0698957	0.0856427	-0.0132268	0.171153	0.0648422	0.0268403
Proteoglycan_syndecan-mediated_signaling_events	0.133657	0.330864	0.314236	0.319439	0.3207	0.257386	0.268455	0.309358	0.203508	0.310575	0.245134	0.311986	0.295933	0.302147	0.189401	0.311823	0.235994	0.314149	0.315273	0.316105	0.301016	0.314797	0.251971	0.292366	0.321523	0.244271	0.314157	0.316223	0.294284	0.30585	0.314958	0.319107	0.308911	0.304675	0.251934	0.2051	0.260654	0.315768	0.314558	0.314251	0.297386	0.282781	0.340212	0.200671	0.315824	0.325349	0.210559	0.343062	0.239061
Signaling_mediated_by_p38-gamma_and_p38-delta	0.133657	0.0872955	0.129097	0.0459129	0.120338	0.0613175	0.0520827	0.101412	-0.00811211	0.0811915	0.0857377	-0.0459932	-0.0359141	0.0445641	0.0997137	-0.00942117	0.0946858	-0.00190118	0.0887031	0.0198816	0.00317902	-0.000567119	0.0826974	0.0633637	0.0581468	0.0580392	0.0254861	-0.00815079	-0.0446563	0.187434	0.0599222	0.0801226	0.0116544	0.0450009	-0.0834751	0.0402008	0.0560154	0.0268843	0.0588911	0.0359004	-0.0142021	-0.00212708	-0.0260081	0.0821261	0.0624832	0.1558	-0.0246277	0.0489459	0.0125537
HIV-1_Nef__Negative_effector_of_Fas_and_TNF-alpha	0.133657	-0.00389466	0.13357	0.0254901	0.119115	0.0298851	0.000865233	0.0586388	0.0422668	0.0463798	0.0586833	0.0602964	0.153379	0.0697961	-0.0141374	0.08665	0.0825622	0.0439352	0.00304527	0.0402981	0.108037	0.088188	-0.0492715	0.05587	0.151916	0.098102	0.128365	0.0634667	0.125849	0.134255	0.0402981	0.102873	0.021926	0.0413015	0.110238	0.112485	0.0406675	0.0516492	0.0518748	0.0910456	0.0574429	0.118077	0.0856055	-0.00900795	0.0726571	0.0433442	0.0793985	0.0691061	0.132945
rho_cell_motility_signaling_pathway	0.133657	0.0130903	0.0551414	-0.0760246	-0.0151694	-0.0763926	-0.013961	-0.0970812	-0.0601611	-0.0584054	-0.070656	-0.0316119	0.00486337	-0.0380912	-0.109099	0.0132741	-0.0558836	0.00365749	-0.0764413	-0.0394019	-0.0642353	-0.0275448	-0.0478065	-0.0644943	-0.0117742	-0.0909597	-0.0911703	-0.0501584	-0.0761896	-0.000528616	-0.0318103	-0.0170384	-0.0180852	-0.0822251	0.0357837	-0.0175641	-0.0534813	-0.0539077	-0.0671997	-0.0428427	-0.0290353	0.0246748	-0.0557951	-0.0265394	-0.0729001	-0.022374	-0.100873	-0.0455774	-0.0315401
Inhibition_of_Host_mRNA_Processing_and_RNA_Silencing	0.133657	0.201865	0.279575	0.218192	0.0684145	0.220824	0.240805	-0.10743	0.22468	0.245142	0.264066	0.0943562	0.0358004	0.275866	0.192284	0.0486449	0.185832	0.203619	-0.097723	0.0728183	-0.134082	0.215872	0.0578603	0.0618005	0.245407	0.212367	0.244791	0.145381	0.0224725	0.179732	0.0589225	0.194788	0.182679	0.189654	-0.163369	0.220421	0.287366	-0.108854	0.174183	0.201606	0.0561435	0.282507	-0.00941183	0.0885728	0.0986951	0.224699	0.106747	-0.185024	0.182319
Release	0.133657	0.253086	0.187229	0.191026	0.251058	0.246951	0.201118	0.224832	0.250595	0.23056	0.239394	0.245172	0.213945	0.206401	0.219716	0.222527	0.213681	0.231294	0.224906	0.246976	0.183004	0.181541	0.215485	0.207305	0.230801	0.240098	0.234981	0.197639	0.162589	0.208338	0.219651	0.237702	0.265921	0.224027	0.132792	0.246625	0.261227	0.229762	0.230788	0.229611	0.134374	0.183635	0.129262	0.245294	0.245746	0.267021	0.254339	0.114535	0.209636
Inhibition_of_PKR	0.133657	0.0438211	0.046084	0.0468979	0.0371727	0.0380179	0.056433	0.196051	0.0405452	0.0212159	0.0261085	0.0315333	0.240674	0.00196276	0.0138874	0.0220324	0.00940213	0.0222431	0.267899	0.0382818	-0.0200458	0.0343142	0.0224964	0.00388993	0.0237826	0.28307	0.021375	0.183508	-0.0359603	0.00246096	0.0252033	0.0268701	0.0559378	0.0134588	-0.0571726	0.0372185	0.0485979	0.0207431	0.016417	0.0207112	-0.00697108	-0.0162649	0.162305	0.0292032	0.036537	0.0533788	0.0494171	0.0730885	0.0073666
Influenza_Virus_Induced_Apoptosis	0.133657	-0.0256212	-0.0303534	-0.0309571	-0.036993	-0.0376987	-0.0130719	-0.0431209	-0.0366244	-0.0391831	-0.0496749	-0.0415722	-0.0684769	-0.0672625	-0.048079	-0.0573969	-0.0612158	-0.047088	-0.0321954	-0.0352254	-0.0853616	0.208759	-0.0381279	-0.0676903	-0.0435339	-0.037607	-0.051508	-0.0661472	-0.0922281	-0.0619786	-0.0486164	-0.0397201	-0.0280461	-0.0666354	-0.107567	-0.0287818	0.130346	-0.0459934	0.0618531	-0.0520474	0.115655	-0.0892972	-0.0178186	-0.045501	-0.02805	0.138651	-0.0224591	0.0542348	-0.0635967
Inhibition_of_IFN-beta	0.133657	0.206064	0.206218	0.209662	0.197651	0.197549	0.219668	0.173802	0.201318	0.177862	0.18254	0.189993	0.15367	0.152984	0.167668	0.171386	0.161397	0.179833	0.189564	0.197531	0.126428	0.193676	0.178873	0.155366	0.181066	0.188142	0.178633	0.161311	0.106382	0.15588	0.182351	0.184801	0.217098	0.165252	0.0763123	0.197771	0.212352	0.177931	0.172105	0.177502	0.142105	0.123943	0.0685509	0.186977	0.195698	0.216669	0.205944	0.048659	0.159015
Phagosomal_maturation_(early_endosomal_stage)	0.133657	-0.00480174	0.0286497	0.0109937	-0.035474	0.0158237	0.0436249	0.00620402	0.0134896	-0.0675354	-0.0200952	-0.025091	-0.0734088	-0.143006	0.0326334	0.125586	0.0584745	-0.0487634	-0.00129773	0.0898244	-0.0546197	-0.00822334	0.00605646	-0.0720008	-0.0178846	-0.0204613	0.0231111	0.100127	0.0471545	0.031318	-0.026396	0.00449501	0.0242771	-0.0708613	0.014173	0.0205435	-0.0312994	-0.0257127	-0.013703	0.104532	-0.0515428	0.0521442	0.00199045	-0.0454395	-0.109812	0.00590992	0.0240992	0.0501456	0.0913665
G2/M_DNA_damage_checkpoint	0.133657	-0.248597	-0.0986749	-0.117472	-0.325252	-0.199889	-0.185699	-0.346493	-0.327045	-0.1868	-0.209661	-0.310426	-0.210195	-0.193692	-0.349473	-0.203839	-0.315774	-0.219062	-0.178214	-0.034452	0.0123631	-0.204856	0.0333731	-0.326751	-0.172071	-0.190585	-0.196237	-0.323413	-0.230901	-0.224844	-0.215261	-0.123824	-0.184771	0.0168502	0.145543	-0.117818	-0.199861	-0.0526348	-0.199259	-0.213364	-0.357529	-0.148138	-0.3487	-0.0336146	0.0450303	-0.126267	0.00803741	0.0297615	-0.193434
Chk1/Chk2(Cds1)_mediated_inactivation_of_Cyclin_B_Cdk1_complex	0.133657	-0.00197556	-0.194965	-0.199964	0.0412458	-0.131395	-0.194442	-0.230246	-0.212862	0.385921	-0.223011	-0.220234	-0.242642	0.147263	-0.237873	0.0253475	-0.232573	0.390764	-0.217306	-0.211172	-0.239718	-0.218888	-0.226647	-0.144712	0.000233976	-0.224601	0.0588869	-0.115265	-0.0929561	-0.0688152	-0.146949	0.392199	-0.115422	-0.157173	-0.167521	-0.21883	0.0442939	-0.153159	-0.0247164	-0.138544	-0.171495	-0.188397	-0.187304	-0.14267	-0.133288	-0.0297125	-0.204864	-0.300924	-0.235011
Activation_of_ATR_in_response_to_replication_stress	0.133657	0.0826403	-0.0183411	-0.0338201	-0.0421826	-0.0506114	-0.070341	-0.100025	-0.086548	0.153374	-0.0444253	-0.0505245	-0.084749	0.15703	-0.083358	-0.0676737	-0.0923814	-0.0208719	-0.0765691	-0.081159	-0.117364	-0.0453634	-0.0781154	-0.116825	0.0785861	-0.0391297	0.0117998	0.063417	-0.0372041	0.0219329	-0.0491902	0.108019	-0.0223039	-0.0256836	-0.129899	-0.0721514	0.0361117	-0.0847715	0.0921695	-0.0352336	-0.129888	-0.0753581	-0.189648	-0.104773	-0.0753144	0.0225992	-0.0166876	-0.174872	-0.0862264
p53-Independent_DNA_Damage_Response	0.133657	0.00200441	-0.00770926	-0.0151615	-0.0292438	-0.0309398	0.000154185	-0.0509325	-0.0251322	-0.0279589	-0.045793	-0.0373128	-0.0716447	0.341469	-0.0593099	-0.0570999	-0.0647064	-0.0492878	-0.0361307	-0.029398	-0.10094	-0.0337665	-0.0483627	-0.0734435	-0.0445595	-0.0442511	0.489743	-0.0655287	-0.116718	-0.0752423	-0.0493392	0.35329	-0.0133113	-0.0651689	-0.13373	-0.0298605	-0.0174743	-0.0525257	0.338642	-0.0529883	-0.0870632	-0.0963143	-0.14478	-0.0448679	-0.0303745	-0.00673275	-0.0162922	-0.167753	-0.0604406
Ubiquitin_Mediated_Degradation_of_Phosphorylated_Cdc25A	0.133657	0.143582	0.197981	0.0643517	0.128003	0.074408	0.205865	0.0252274	0.104851	0.11875	0.0293048	0.0140253	0.0437039	0.130237	0.0512321	0.122815	0.000461822	0.138986	0.0716647	0.0538121	0.104496	0.113076	0.111895	0.12588	0.10918	0.183256	0.11304	-0.0780693	0.018712	0.0783633	0.013601	0.0624461	-0.0792976	0.163586	0.188647	0.110567	0.194905	0.108957	0.0948264	0.139573	0.116836	0.0873015	-0.0216605	0.222421	0.215233	0.126861	0.0161685	0.0636887	0.127458
Translocation_of_GLUT4_to_the_Plasma_Membrane	0.133657	-0.01567	-0.0132231	-0.00145045	-0.0160773	0.0292496	0.0328499	0.0504065	0.00623343	-0.040947	0.0569834	0.0167874	-0.00981526	-0.0287486	0.091653	-0.00622742	-0.0181107	0.0107544	0.0251541	0.063181	0.017799	-0.00543376	0.0569789	0.00136665	-0.0552866	0.0673557	0.0403601	0.0830035	-0.0895924	0.00304601	0.0544779	-0.00663536	0.0339198	-0.00200426	-0.0203696	-0.0061674	0.0520627	0.0811078	0.000233048	-0.0419304	-0.0345848	0.00333876	-0.104183	0.0801416	-0.0209818	-0.015658	0.0609443	-0.0912914	-0.0581669
Inhibition_of_HSL	0.133657	0.0609041	0.0491501	0.311003	0.37881	0.135924	0.317774	0.368862	0.139503	0.147337	0.370738	0.37065	0.247855	0.10658	0.360845	0.113678	0.385333	0.14491	0.376339	0.375323	0.0718956	0.0832716	0.291673	0.10349	0.12691	0.332798	0.367366	0.316657	0.0781605	0.0913362	0.265962	0.295722	0.360691	0.0991315	0.354873	0.13692	0.315861	0.293422	0.289188	0.121204	0.117616	-0.283702	0.0445895	0.272804	0.165669	-0.218903	0.308012	0.317685	0.11066
c-src_mediated_regulation_of_Cx43_function_and_closure_of_gap_junctions	0.133657	-0.0365791	-0.0262392	-0.0340389	0.0604702	-0.0471676	-0.0200519	-0.068416	-0.0437612	0.0208505	-0.0627321	0.0314336	0.000171041	0.000936933	0.0119358	-0.0722815	-0.0788207	-0.066467	0.0541487	-0.0462888	-0.0267054	-0.0489075	-0.0655361	-0.00121956	-0.0613735	-0.0603805	-0.0663763	0.00629827	-0.044231	-0.0896606	0.0454677	-0.0550584	0.0567583	0.00759888	-0.0594673	-0.0470679	-0.0364198	0.041587	-0.0719646	-0.0697972	-0.101621	-0.0256678	-0.144892	-0.062087	0.0633912	-0.0248077	-0.0362359	-0.0887144	-0.0774985
Endosomal_Sorting_Complex_Required_For_Transport_(ESCRT)	0.133657	0.0548876	0.120506	0.0463872	0.0528253	0.0794005	0.105256	0.0798782	0.112109	0.157528	0.088672	-0.0287442	0.0358742	0.134759	0.110316	0.260372	0.063368	0.195948	0.0561091	0.0507427	0.0646239	0.128881	0.0483151	0.0895437	0.0715806	0.194224	0.03071	0.11807	0.0316342	0.150016	0.058783	0.0601743	0.0241582	-0.0627079	0.0438348	0.0478033	0.13545	0.0480331	0.0241076	0.127418	0.0768172	0.0669094	0.0117865	0.0869388	0.0200736	0.11071	0.0201096	-0.0645953	0.0827937
Signaling_events_mediated_by_VEGFR1_and_VEGFR2	0.133657	-0.00507784	-0.0109786	0.0454284	0.0351023	0.0709543	0.048593	0.135607	0.0329387	0.0565763	0.0939245	0.0865386	0.0659005	0.0691148	0.112221	0.0334846	0.0880916	0.0709159	0.0735796	0.051553	0.103368	0.0609179	0.0574474	0.0809769	0.0125922	0.106856	0.0728171	0.0889915	0.0631172	0.0560305	0.082126	0.0384967	0.127231	0.0868384	0.0968918	0.0816853	0.0872106	0.077452	0.0497864	0.0883609	0.0837371	0.0544779	0.044212	0.0667927	0.0706827	0.00570139	0.0545999	0.0733339	0.0456962
atm_signaling_pathway	0.133657	-0.168057	-0.0620049	-0.0618551	-0.0803586	-0.0537108	-0.155125	-0.122725	-0.104453	-0.133145	-0.0803865	-0.126593	-0.125974	-0.0654262	-0.0939918	-0.128757	0.0201793	-0.0542009	-0.0964154	-0.105983	-0.00934002	-0.138554	-0.0654571	-0.0626661	-0.0614624	-0.0700702	-0.0458183	-0.0258168	-0.148172	-0.0137989	-0.115079	-0.169944	-0.0506569	-0.0421186	0.062334	-0.0601459	-0.120511	-0.0553513	-0.0770282	-0.033641	-0.171899	-0.202498	-0.069612	-0.0947904	-0.0856105	-0.189231	-0.117425	-0.0363628	-0.14529
IL8-_and_CXCR2-mediated_signaling_events	0.133657	-0.0265895	-0.0254889	-0.0359065	-0.0681704	-0.0609258	-0.0573986	-0.0811818	-0.0264907	-0.0553016	-0.101725	-0.0600383	-0.0313732	-0.03855	-0.0787257	-0.0255536	-0.014291	-0.0262524	-0.0826058	-0.0512791	0.0170246	-0.052515	-0.0759161	-0.0162648	-0.11297	-0.0691272	-0.0609973	-0.0725389	0.00945659	-0.0506285	-0.0621707	-0.0349545	-0.0390127	-0.0876172	0.0786709	-0.0576475	-0.112201	-0.0340611	-0.0445336	-0.0587366	-0.058183	0.10704	0.0710637	-0.0778951	-0.0904719	-0.0705743	-0.0805441	0.0164519	0.0853683
ATM_mediated_response_to_DNA_double-strand_break	0.133657	-0.421744	-0.245665	-0.3592	-0.335222	-0.403171	-0.392341	-0.410363	-0.344458	-0.308615	-0.394053	-0.27748	-0.323473	-0.296943	-0.411394	-0.336513	-0.277707	-0.405029	-0.275861	0.265328	0.461756	-0.396839	0.249309	-0.295493	-0.273332	-0.307697	-0.316559	-0.4219	-0.313303	-0.430713	-0.415067	-0.354568	-0.347218	0.483707	0.458539	-0.472158	-0.46801	0.249326	-0.31868	-0.387901	-0.393932	-0.30931	-0.32038	0.260086	0.264729	-0.390694	-0.397697	0.464204	-0.281371
The_canonical_retinoid_cycle_in_rods_(twilight_vision)	0.133657	0.242938	0.204566	0.331521	0.191152	0.283773	0.347174	0.303333	0.32904	0.277118	0.325386	0.28291	0.214076	0.194477	0.319703	0.223222	0.249124	0.27013	0.257042	0.280495	0.244718	0.278438	0.326731	0.286211	0.191985	0.29034	0.275807	0.206459	0.171419	0.226363	0.318075	0.251647	0.180473	0.275908	0.286236	0.339909	0.24542	0.275687	0.242714	0.227172	0.322189	0.257046	0.262877	0.264983	0.266384	0.278924	0.328093	0.276021	0.295118
The_retinoid_cycle_in_cones_(daylight_vision)	0.133657	0.16332	0.17291	0.169175	0.224775	0.270475	0.176389	0.268876	0.161588	0.275597	0.281803	0.250016	0.186794	0.189867	0.262245	0.137278	0.135189	0.228308	0.157418	0.155458	0.17859	0.126812	0.232116	0.205154	0.274272	0.154116	0.20923	0.148515	0.276205	0.22986	0.144113	0.210135	0.310616	0.139664	0.0571394	0.155984	0.227839	0.143541	0.274302	0.252082	0.244599	0.235485	0.0565557	0.281922	0.2491	0.173562	0.163117	0.0377392	0.191924
Retinoid_metabolism_and_transport	0.133657	0.157848	0.205299	0.254983	0.203255	0.215461	0.231106	0.241929	0.222879	0.209717	0.252747	0.270732	0.265592	0.196879	0.244475	0.202943	0.245664	0.207054	0.204162	0.227204	0.197952	0.223794	0.246687	0.23675	0.1908	0.229961	0.231605	0.136148	0.148189	0.155418	0.219978	0.211369	0.212351	0.271302	0.238022	0.184351	0.190433	0.194897	0.203988	0.19483	0.258126	0.204218	0.274573	0.17251	0.198185	0.281442	0.238937	0.28934	0.217246
ATM_mediated_phosphorylation_of_repair_proteins	0.133657	-0.105298	-0.315624	-0.354801	-0.348301	-0.364514	-0.355212	-0.373946	-0.352657	-0.148223	-0.175876	-0.121934	-0.355011	-0.254258	-0.277001	-0.354828	-0.339047	-0.164685	-0.126317	-0.113011	-0.0987884	-0.155822	-0.147091	-0.347608	-0.145852	-0.132262	-0.119652	-0.158406	-0.202689	-0.384411	-0.338563	-0.251536	-0.243796	0.11218	-0.0936097	-0.375629	-0.363862	0.0130108	-0.284548	-0.180959	-0.381933	-0.194285	-0.369407	-0.139324	0.0523645	-0.144266	-0.290564	0.0699005	-0.334341
Recruitment_of_repair_and_signaling_proteins_to_double-strand_breaks	0.133657	-0.0688245	-0.208317	-0.224114	-0.230549	-0.234229	-0.215672	-0.247574	-0.229553	-0.153121	-0.126668	-0.108756	-0.243452	-0.204473	-0.187175	-0.243222	-0.242562	-0.157001	-0.10744	-0.136638	-0.155626	-0.147986	-0.161536	-0.250738	-0.148684	-0.105788	-0.146658	-0.136312	-0.175436	-0.265851	-0.237991	-0.189138	-0.150116	0.101087	-0.167154	-0.235914	-0.229894	-0.160321	-0.202062	-0.129332	-0.267218	-0.162219	-0.290891	-0.156717	0.0512001	-0.122075	-0.212976	-0.183153	-0.240601
Deadenylation_of_mRNA	0.133657	-0.0507395	-0.143966	0.0126676	-0.0848318	-0.0452072	-0.00518755	-0.0224115	0.0233233	0.0550465	0.0651248	-0.09133	0.0187859	-0.0700812	-0.0980009	-0.00252451	-0.146378	0.00311563	-0.00952296	-0.0944584	-0.0860232	-0.0563173	-0.00834801	-0.0589886	0.0172815	0.10506	0.000549897	-0.00552772	-0.0458866	-0.0747836	0.085132	-0.03305	-0.0630421	0.0142435	-0.0241307	0.00713795	0.0366655	-0.0542833	-0.0747551	-0.000189139	-0.0681645	-0.0238141	-0.15114	0.0117191	-0.0118363	-0.0576454	0.000375647	-0.120494	0.0221955
toll-like_receptor_pathway	0.133657	0.00543151	0.0119601	0.00631089	0.0854323	0.108866	0.0543289	0.0868683	0.0321215	0.0303527	0.0582431	0.104556	0.0646087	0.018185	0.0459478	0.0581597	0.111474	0.0240248	0.0739093	0.0259598	0.0947489	0.0188372	0.0185685	0.122795	0.0856421	0.0610755	0.0508046	0.140364	0.0792885	0.102264	0.0700781	0.00201791	0.106723	0.0771658	0.106901	0.0848935	0.0354979	0.0297427	-0.00559511	-0.000828582	0.0216409	-0.0210854	0.136377	0.0363458	0.0855196	-0.00351078	0.0937687	0.185362	-0.00362084
Signaling_events_mediated_by_HDAC_Class_II	0.133657	-0.0534367	-0.0569677	-0.0911494	-0.0315923	-0.076067	-0.0313562	-0.0516995	-0.0777881	0.0155556	-0.0214173	-0.055139	-0.0958194	-0.0183249	-0.0146227	-0.0257835	-0.0699461	0.00536861	-0.0570772	-0.10374	-0.118015	-0.0140776	-0.0557966	-0.0447515	-0.0671779	-0.0215019	-0.0417397	-0.00798392	-0.124513	-0.031645	-0.0501521	0.0487784	-0.05684	-0.064807	-0.101881	-0.0108327	-0.0358349	0.0105846	-0.0660623	-0.0224785	-0.122399	-0.0141134	-0.0766396	0.0860461	-0.0568138	-0.0078527	0.0146293	-0.0807438	-0.0937172
ca-calmodulin-dependent_protein_kinase_activation	0.133657	0.0217628	0.0463465	0.0450799	0.0891148	0.127494	0.082749	0.0627817	0.0827244	-0.0298285	-0.0123458	0.137967	0.0862151	-0.00241926	0.0983931	-0.0899165	0.00636306	0.0500825	0.128121	0.107058	0.0667316	0.0855359	0.104722	0.0611559	0.0281608	0.0446494	0.151316	-0.100697	-0.0432711	0.0121486	0.10831	-0.0533429	-0.0134954	0.0245997	0.0726874	0.100365	-0.0314599	0.160813	0.0906364	-0.016813	0.095071	0.0509661	0.100621	0.132856	0.038483	0.0272287	0.0318797	0.0681042	0.00498013
pdgf_signaling_pathway	0.133657	0.0373858	-0.0851944	-0.0033292	0.0421693	0.0396898	-0.00556371	0.00208139	-0.00539541	0.0151216	0.0144037	0.0231934	-0.0401414	0.0266532	0.0310408	0.00348096	0.0680316	0.0436557	-0.0111988	0.0234189	0.0731993	0.00683414	0.0523434	0.0556607	0.0572387	0.0741045	0.0107386	0.0557957	0.0227067	0.0352322	0.0127517	-0.00847869	0.0946553	0.0595814	0.100103	0.0107437	0.0112238	0.0502093	0.0276887	0.0304729	-0.045881	0.0205914	0.0428466	0.103924	0.0590369	0.0404848	0.0490296	0.0601517	0.0171449
cadmium_induces_dna_synthesis_and_proliferation_in_macrophages	0.133657	0.127171	0.163292	0.171928	0.17768	0.146261	0.19908	0.145154	0.12472	0.207981	0.167518	0.144614	0.0979861	0.141291	0.126128	0.124873	0.147946	0.168866	0.174369	0.0580835	0.0658959	0.181468	0.0837936	0.17027	0.192188	0.222341	0.172412	0.120219	0.107379	0.207597	0.144711	0.113815	0.157758	0.156446	0.180827	0.188258	0.198661	0.169352	0.130703	0.193352	0.0708239	0.167623	0.103338	0.153439	0.148791	0.171049	0.0975936	0.0640169	0.20456
fosb_gene_expression_and_drug_abuse	0.133657	0.034948	0.1687	0.128884	-0.0226459	0.0141624	0.127733	0.0463966	0.00899885	-0.0126207	0.000763615	0.00695483	0.0181095	0.0385091	0.104468	-0.00696802	0.0885717	0.168658	0.0213029	-0.0274647	0.116658	0.0721847	0.121682	0.0687024	-0.00579317	0.0089712	-0.00607309	0.16396	-0.128088	0.054321	-0.012897	0.0860792	0.153733	0.072826	-0.0100511	0.00478612	0.122881	0.0142945	-0.0198376	0.0267411	0.0983706	0.109562	-0.00746186	0.0212599	0.0447643	0.0638431	-0.0227314	-0.0345483	0.0372331
Reelin_signaling_pathway	0.133657	-0.0534091	-0.0640234	-0.051901	-0.0268737	-0.0289888	0.00355182	-0.00978052	-0.0219441	-0.0395609	-0.0155298	-0.0167343	-0.0721089	-0.0627978	-0.0282429	-0.0761172	-0.0545726	-0.0305231	0.0261407	-0.0438782	-0.0398661	-0.0172944	0.00528144	-0.0446423	-0.0219784	-0.0813061	-0.0221323	-0.0398505	-0.00340484	-0.0179075	-0.0158672	-0.0428663	-0.00380862	-0.0714495	-0.0396493	-0.0605957	0.00101948	-0.0177549	-0.0512356	-0.0349061	-0.0539801	-0.0761276	-0.0825238	0.0359262	-0.0129016	-0.0390126	0.0205379	-0.0795641	-0.0453115
DAG_and_IP3_signaling	0.133657	0.0575946	-0.0838808	-0.0936731	-0.00286521	-0.0119689	-0.0827574	0.00670567	-0.0988726	-0.114397	0.238804	0.0194067	-0.145527	-0.0572466	0.141545	-0.126915	0.0645359	-0.0414391	0.0193917	-0.0019156	-0.0696447	-0.104819	0.0485552	-0.0432793	0.0131267	0.119454	-0.125272	0.0081122	0.14689	-0.00233597	-0.113445	-0.136976	0.0105425	-0.00939472	0.164458	-0.0698657	-0.0831215	-0.027016	-0.115902	-0.0129791	-0.139665	-0.145541	-0.0916543	0.0302239	0.026909	-0.080497	-0.0819335	-0.0391854	-0.117482
CaM_pathway	0.133657	0.239899	-0.430039	-0.433796	-0.39236	-0.43816	-0.440693	-0.446782	-0.438284	0.215408	-0.444964	-0.44031	-0.443447	0.190583	0.20464	-0.433655	-0.440782	-0.483368	-0.49112	-0.435559	-0.4689	-0.437087	-0.444065	0.191559	-0.487925	-0.428095	-0.479701	-0.457742	-0.434576	0.192921	-0.440175	0.218235	-0.474309	-0.289296	-0.424379	-0.446156	-0.429505	0.214945	0.209394	0.214174	0.180843	0.161389	-0.425592	-0.458242	-0.437544	-0.436262	0.240541	0.0887124	-0.452817
MEK_activation	0.154551	0.0299282	0.0132617	0.08415	0.165463	0.0446636	0.0688692	-0.0553241	0.0486379	0.0833871	0.0452163	0.0524749	0.0314837	0.13117	0.117837	0.154447	0.028489	0.038088	0.0513542	0.0534525	0.0305685	0.0789939	0.0822649	0.0625333	0.174017	0.13139	0.177353	0.179562	0.0480018	0.0848229	0.0419296	0.0968748	0.155769	0.0918028	-0.11743	0.097876	0.180213	0.119935	0.116016	0.180904	-0.0815605	0.0984802	-0.0436172	0.0830497	0.056568	0.122805	0.100909	-0.0591328	0.0735025
RAF_phosphorylates_MEK	0.177075	0.0538479	0.0615461	0.122228	0.185141	0.0891871	0.112341	-0.0207786	0.0928275	0.117793	0.0871178	0.0942816	0.0725549	0.151053	0.142497	0.173498	0.0700752	0.0799904	0.0926387	0.0957953	0.0638065	0.115297	0.093054	0.0720226	0.190548	0.156716	0.193548	0.191919	0.0747835	0.113039	0.084469	0.126223	0.181121	0.119581	-0.0878365	0.132177	0.20003	0.123894	0.140907	0.196063	-0.0482604	0.120166	-0.00528036	0.119615	0.0983359	0.154322	0.112935	-0.04672	0.105812
PKA_activation	-0.168254	-0.16497	-0.0863325	0.00909107	-0.0686608	0.0340404	-0.0714385	0.00469712	-0.0239102	-0.105029	-0.000475178	0.145604	-0.143926	-0.102559	0.100825	0.0131609	0.10748	-0.0379409	0.0323843	-0.0637531	0.063577	-0.124988	0.0549772	0.134608	-0.0209337	-0.0221043	0.0400643	0.0581977	-0.00983393	0.0112124	0.126572	-0.123277	0.121355	0.0530641	0.0708596	0.0643689	0.0101229	-0.0333562	-0.0237974	-0.131127	0.0200227	-0.0586586	0.00200584	0.107332	0.0520784	-0.142837	0.0222458	0.106891	0.00825311
CaMK_IV-mediated_phosphorylation_of_CREB	-0.223792	0.0330539	-0.224727	-0.233557	-0.223564	-0.149429	-0.0416674	-0.0915258	-0.0812517	0.0145867	-0.06268	-0.11577	-0.0556824	0.0830172	0.127862	-0.239337	-0.251392	-0.251469	-0.0428728	-0.216286	-0.187113	-0.208685	-0.0787095	0.0587045	-0.0960717	-0.116905	-0.107014	-0.252774	-0.268658	-0.0159874	-0.0835245	0.0105504	-0.221784	-0.181199	-0.0814809	-0.0647821	-0.241537	0.0649371	0.021164	-0.00344467	0.107095	-0.0283723	-0.0498803	-0.234706	-0.218402	-0.2229	0.149374	0.0211265	-0.236458
Calmodulin_induced_events	-0.0252495	-0.0147064	-0.309361	-0.12244	-0.125179	0.0409679	-0.00342642	-0.131851	-0.117871	0.0840381	-0.129041	-0.134642	-0.343663	0.00870359	0.0705589	-0.0707235	-0.141374	-0.0417222	-0.121732	-0.0522955	-0.140624	-0.0564767	-0.13658	0.00985888	-0.0551022	-0.13019	-0.121039	-0.130143	-0.156336	0.0638801	-0.129204	-0.0290408	-0.108352	-0.127825	-0.171524	-0.0237605	-0.122131	-0.0352353	0.138839	0.0260283	-0.21489	-0.066464	-0.0534393	0.148179	-0.127207	-0.0122674	-0.0180813	-0.0630587	-0.0405602
PKA-mediated_phosphorylation_of_CREB	0.0150907	0.0112024	0.0801143	0.103678	0.0103754	0.171352	0.256059	0.137517	0.236435	0.0223484	0.163372	0.207615	0.249854	0.185346	0.235329	0.0075869	-0.00934283	-0.0112581	0.23572	0.035872	0.17772	0.0374639	0.22105	0.145442	0.264188	0.178918	0.113293	-0.00837743	0.0265715	0.0505332	0.217015	-0.00522028	0.0248484	0.0737197	0.188496	0.167688	0.0936541	0.0851295	-0.14353	-0.0129007	0.214069	0.0649691	0.123084	0.0915555	0.105703	0.0289495	0.241101	0.111119	0.181089
t_cell_receptor_signaling_pathway	0.0693339	0.0396465	0.108004	0.0220771	0.0451385	0.0442045	0.0246751	0.0319968	0.0557162	0.00120672	0.0242524	0.0128933	0.0975053	0.0555408	0.00713216	-0.00411289	0.0391284	0.00380418	0.0421627	0.0438301	0.131243	0.0430313	0.0432324	0.0246326	0.0781666	0.00495627	0.00813903	0.0129712	0.108997	0.0748233	0.0444236	0.0181355	0.0380144	-0.00574594	0.12277	0.0582729	0.0306087	0.0633309	0.030796	0.0273243	0.0710858	0.11218	0.0886196	0.0547298	0.0199031	0.0345521	0.0561711	0.111635	0.0843873
il-2_receptor_beta_chain_in_t_cell_activation	-0.0206694	0.00827492	0.0777407	0.00740643	-0.0153759	0.0228204	-0.0322152	-0.0176815	0.0364647	0.011684	-0.0264003	-0.0337703	0.0857685	0.084323	-0.0417002	-0.0487936	-0.0141169	-0.0478841	-0.00902297	0.0112358	0.105727	0.0086456	-0.033915	0.0142312	0.0280199	-0.019384	-0.0255249	-0.00644652	0.115182	-0.0220605	-0.0181861	0.0194572	-0.00342622	-0.0511321	0.080446	-0.0244889	-0.0474019	-0.0338936	-0.0144199	-0.0244608	0.0591619	0.105552	0.122744	-0.024596	-0.0237693	-0.00495832	0.0337446	0.0941845	0.115786
ATR_signaling_pathway	0.0124936	0.0157809	-0.0316939	-0.0547619	-0.0599784	-0.0253608	-0.0817103	-0.0886432	-0.0714842	0.115881	-0.000256677	-0.0209596	-0.0840303	0.109041	-0.0675032	-0.055232	-0.0645725	0.0302845	-0.071718	-0.08365	-0.0870624	-0.0303743	-0.0398733	-0.0881589	0.0693592	-0.0300991	0.0831536	-0.00193291	-0.0245021	0.0108863	-0.0593889	0.108837	-0.0306865	-0.00894295	-0.0683807	-0.060351	-0.00515403	0.000449325	0.0163685	-0.0216327	-0.0900447	-0.0352914	-0.128653	-0.0554988	-0.0214696	-0.0173345	-0.0328966	-0.145182	-0.075713
the_igf-1_receptor_and_longevity	0.156522	0.124497	0.0166288	0.0555832	0.0751013	0.0847857	0.045719	0.0462649	0.0491884	0.0308489	0.00910009	0.0678675	0.0677796	0.0848594	0.0687669	0.0124509	0.0410225	0.077062	0.0496248	0.118522	0.0939895	0.104764	0.0892266	0.0502733	0.1324	0.0330247	0.0222671	0.0557396	0.0718539	0.0596631	0.0573437	0.0158626	0.0513196	0.0601428	0.0667776	0.0337742	0.0345155	0.121432	0.0582188	0.0647664	0.0485645	0.0438283	0.0301145	0.121332	0.04728	0.0652157	0.0673907	0.0629802	0.0258103
Hydrolysis_of_LPC	0.0428559	0.0275759	-0.0633778	-0.170289	0.0425522	0.032213	-0.0545153	0.00577759	0.0203686	0.000560197	-0.0204211	-0.089071	0.00242833	-0.00271589	0.000936777	-0.0071876	-0.0281072	-0.126166	0.0161132	0.0203991	-0.00909759	0.0191602	0.0049242	-0.00462174	0.0122785	0.012627	0.00868271	-0.0546393	0.00263391	0.0230091	-0.0815147	0.15104	0.0266315	-0.0996752	-0.0374938	0.0181897	-0.173063	0.0115167	0.0062411	-0.0394764	-0.00665555	-0.0142493	-0.0456349	-0.0936046	0.0467373	0.00889026	0.0161217	-0.0649967	0.000265524
Acyl_chain_remodelling_of_PC	0.0451993	0.0307214	0.00256239	0.00762197	0.138973	0.0666227	0.0691067	0.0982074	0.0659562	-0.0329982	-0.0127074	0.0264409	0.0863883	0.0716159	0.0316518	-0.00283461	0.0037273	-0.150775	0.0807872	0.0646534	0.0341062	-0.00757177	0.0398528	0.0729183	0.0397892	-0.00706427	0.0110997	0.0365562	0.0705925	0.0848108	0.0122767	0.149209	0.00327401	0.0703284	0.0634844	0.0474743	-0.0136574	-0.056872	-0.0389831	-0.0362626	0.0585156	-0.0277396	0.0605389	-0.0447795	0.00478233	0.00980733	-0.030685	0.0797137	0.0288969
Acyl_chain_remodelling_of_PS	0.136368	0.130234	0.0412711	0.0630753	0.182567	0.101158	0.122032	0.1194	0.10415	-0.0403721	0.014622	0.0485741	0.119619	0.14843	0.0215481	0.0254933	0.0552417	-0.138325	0.0791598	0.106529	0.0652058	0.0621209	0.0124401	0.125932	0.1371	-0.0392219	0.0576135	0.0977379	0.159574	0.111645	0.0116374	0.200766	0.0467047	0.14779	0.124024	0.089875	-0.015223	-0.0778529	0.00140378	-0.0272229	0.118878	0.026104	0.129366	-0.051032	0.022385	0.0884913	-0.0807805	0.141419	0.0754438
Acyl_chain_remodelling_of_PI	0.100293	0.113964	0.0954563	0.0654699	0.159796	0.110513	0.169522	0.13946	0.122772	-0.00653722	0.0209816	0.0229806	0.142894	0.141133	0.0438206	0.041881	0.052331	-0.102159	0.110897	0.121659	0.0930315	0.0931007	0.0392516	0.145881	0.1554	-0.0360016	0.10412	0.0760421	0.137736	0.0726951	0.0821126	0.228133	0.06297	0.123453	0.143677	0.10828	-0.0150007	-0.0520142	-0.020951	-0.0117048	0.139703	0.0555236	0.15027	-0.091	0.0539285	0.101985	-0.0794732	0.174068	0.0902171
Acyl_chain_remodelling_of_PG	0.00568236	0.0130637	-0.02858	-0.0125589	0.151755	0.0124004	0.0497367	0.0401071	0.0213415	-0.0626875	-0.0608488	0.00743528	0.0452675	0.0409772	-0.0182433	-0.0381943	-0.0158585	-0.163405	0.107698	0.0188691	-0.00207085	-0.00877663	-0.0472094	0.0432361	0.072955	-0.117756	-0.00190363	0.0391636	0.0393574	0.0484529	-0.0458089	0.116478	0.00469715	0.0702992	0.046312	0.00941221	-0.0768074	-0.0971544	-0.0952034	-0.0346091	0.0399097	-0.0237242	0.0537656	-0.0732446	-0.00495765	0.0191269	-0.11504	0.102124	0.00646896
Synthesis_of_PG	0.186961	0.0652118	-0.186945	-0.0503461	0.0625524	0.0410453	0.0429684	-0.342227	0.0372383	0.0600917	-0.3372	0.0252477	0.040605	0.05269	-0.0741986	0.0583956	0.0822055	0.253697	-0.0995406	0.0680714	0.035385	0.192338	-0.323142	0.0416405	0.33171	0.0765478	-0.0751086	0.0381896	0.02332	0.0552172	0.066204	0.0629163	-0.0445483	0.0579852	-0.105444	-0.0547033	-0.310769	0.0571167	-0.162103	0.177626	0.174932	0.330539	0.105143	-0.0998276	-0.09117	0.0416091	-0.309628	0.234182	0.0883382
Acyl_chain_remodeling_of_CL	0.212394	-0.0839897	-0.0944765	0.167159	0.132643	-0.0209797	-0.0779718	0.161788	-0.0197302	0.0211043	0.121823	0.0487949	0.0611637	0.149963	0.0766195	-0.000597505	-0.189077	-0.177017	0.00103295	-0.322099	0.0192433	-0.100799	0.143785	-0.187613	0.0924805	0.131276	-0.0504077	-0.0754056	2.11e-05	0.0401217	-0.0251385	0.101733	-0.141892	0.1198	-0.357877	0.173129	0.0462569	-0.169218	0.152549	0.199386	-0.0881127	-0.120717	-0.361252	0.019284	0.09145	-0.0922285	0.0302115	-0.0429818	-0.00700213
TCR_signaling_in_na_ve_CD4__T_cells	0.00164134	0.023511	0.105078	0.000690829	0.00965573	-0.000912222	-0.0195287	-0.00137082	0.0150513	-0.0547275	-0.0269231	0.000633229	0.079289	0.0287466	-0.0085933	-0.0336055	-0.0279029	-0.0585468	-0.0174048	-0.0276967	0.159396	-0.0129039	0.00156294	0.00439496	-0.000753122	0.00146513	-0.024899	-0.0238493	0.140834	-0.0388634	0.0136114	-0.0153642	0.0321359	-0.0218258	0.140625	-0.0128086	-0.0150199	-0.0138046	-0.0319463	-0.0101222	0.0543653	0.146222	0.139933	-0.027123	-0.0143378	-0.0210217	0.023342	0.131089	0.110786
IL12_signaling_mediated_by_STAT4	-0.0808449	-0.0392263	0.0683326	-0.0977379	-0.0803449	-0.0525405	-0.13657	-0.0772796	-0.0837768	-0.0299547	-0.111765	-0.0651585	0.122603	0.0353864	-0.096465	-0.102583	-0.0262144	-0.0479286	-0.0603694	0.014959	0.2303	-0.00337468	-0.107876	0.0718365	0.00386033	-0.058718	-0.0709684	-0.0860854	0.13892	-0.0792952	-0.123267	0.0643633	-0.0717308	-0.0652122	0.278534	-0.140903	-0.103282	-0.143759	-0.106406	-0.00813584	0.0550531	0.105016	0.267447	-0.12438	-0.0676159	-0.135679	-0.0176699	0.212914	0.0752489
inactivation_of_gsk3_by_akt_causes_accumulation_of_b-catenin_in_alveolar_macrophages	0.0473098	-0.0240045	0.00521037	0.0298741	0.0762616	0.110588	0.00503445	0.099053	0.0195957	0.101666	0.0728269	0.0621098	0.0537828	0.0141199	0.0454282	-0.012355	0.0561085	0.0198757	0.10662	0.0423771	0.102423	0.0370256	0.104176	0.0639523	0.042625	0.0585153	0.0459021	0.0624368	0.0464823	0.0713082	0.103272	0.0419829	0.0694443	0.0300395	0.0844433	0.0278421	0.0666884	0.0939664	0.0371649	0.0603103	-0.0298241	-0.00209405	0.0609576	0.121347	0.0608014	0.0314728	0.00422407	0.0754634	0.00472931
il12_and_stat4_dependent_signaling_pathway_in_th1_development	-0.089614	-0.105849	0.0073056	-0.212975	-0.133595	-0.160272	-0.172359	-0.113741	-0.0427462	-0.033134	-0.187756	-0.102583	0.158508	0.0403371	-0.0967918	-0.0716563	-0.0187946	0.0325003	-0.142113	0.0805611	0.369749	0.0154649	-0.0302391	0.00083055	-0.0212773	-0.0823519	-0.146144	-0.170922	0.292839	-0.168794	-0.132294	0.0719056	-0.103163	0.0198978	0.35725	-0.198557	-0.189229	-0.121289	-0.221825	0.0556508	0.0487976	0.201046	0.332548	-0.113877	-0.155568	-0.113408	-0.127257	0.33626	0.145707
apoptotic_signaling_in_response_to_dna_damage	0.0141449	0.00489486	0.0731222	0.0933846	0.0901742	0.013663	0.0864913	0.00582631	0.0939286	0.0816088	0.047531	0.095796	0.139318	0.117434	0.0319316	0.124627	0.143086	0.0718225	0.039074	0.114707	0.156115	0.104444	0.0641911	0.0905096	0.152769	0.0780756	0.194626	0.0578736	0.0572089	0.107153	-0.0083722	0.071974	0.0400791	0.139074	0.08985	0.0818433	-0.0488342	0.101676	0.120445	0.0653736	0.0784556	0.00181665	0.0966528	0.0367336	0.0157087	0.0788612	0.0766078	0.134158	0.102444
Purine_catabolism	0.241057	0.235125	0.236633	0.208244	0.14443	0.0485618	0.112475	0.180141	0.20599	0.18769	0.0940297	0.0993825	0.216341	0.364022	0.176514	0.222118	0.199866	0.18919	0.054054	0.262087	0.245342	0.19712	0.140678	0.349263	0.256668	0.138763	0.199397	0.154824	0.299967	0.206952	0.0961607	0.231834	0.0544214	0.305509	0.182544	0.106118	0.0675059	0.189385	0.335124	0.188561	0.279225	0.117587	0.164013	0.177389	0.160885	0.235671	0.112474	0.15296	0.173851
Purine_salvage	-0.0965813	-0.0913314	0.0699891	-0.0939929	-0.0296009	-0.103568	-0.0903813	-0.119007	-0.103224	-0.116426	-0.114918	-0.112279	-0.129976	0.296643	-0.123424	0.0384857	0.285234	-0.121869	-0.0186648	0.307822	0.135754	-0.101359	-0.115747	0.279632	0.341637	-0.110071	-0.191947	-0.123139	0.211185	0.0359154	-0.11445	0.045059	-0.177032	0.175813	-0.0975797	-0.10503	-0.0941712	-0.115747	0.337688	-0.0304008	0.219105	-0.0614671	-0.105552	-0.109849	-0.105303	0.00368869	-0.0983538	-0.120849	-0.127087
Pyrimidine_biosynthesis	0.0524896	0.15207	-0.14567	-0.144932	-0.154576	-0.15194	-0.137763	-0.164893	-0.150378	0.117999	-0.160248	-0.156326	-0.17824	0.108869	0.0517001	-0.170657	0.0282569	0.0323906	-0.157904	-0.152984	-0.198667	0.0479492	-0.161502	0.0242206	0.108035	0.145167	0.0331108	0.125602	-0.205168	0.015308	-0.163715	0.134008	-0.143903	0.0976806	-0.216968	-0.153741	0.0834607	-0.166314	0.158056	-0.168878	-0.184394	-0.190438	-0.221263	-0.157893	-0.154597	-0.144039	0.218356	-0.2376	-0.173757
The_proton_buffering_model	0.187655	-0.00824947	-0.00941733	-0.00474587	-0.0137848	-0.0116543	0.00181089	-0.0261364	-0.00996929	0.127737	-0.0209538	-0.0167781	-0.0404943	-0.0414266	-0.00142701	-0.0295285	-0.0351836	-0.0248155	-0.0175545	-0.0123819	-0.0523119	-0.016497	0.130365	-0.0382209	-0.0247979	-0.0185838	-0.025631	-0.031306	-0.0731539	-0.0239793	0.131738	-0.0373892	0.000584815	0.114336	-0.0917685	0.142621	-0.00307875	-0.0256227	0.118475	0.0120681	-0.0470923	0.0784611	-0.0984536	-0.015981	-0.0134569	-0.0012717	0.0957963	0.0205895	-0.0378417
Purine_ribonucleoside_monophosphate_biosynthesis	-0.363826	-0.344501	-0.479516	-0.365727	0.292643	-0.484501	-0.367834	-0.387467	-0.483165	0.281285	-0.383201	-0.379809	0.258157	-0.481058	-0.387467	-0.378113	-0.486608	0.280977	-0.368759	-0.481006	-0.365316	0.287864	-0.376623	-0.48815	-0.472526	-0.361204	-0.467284	-0.36398	-0.476483	-0.472526	-0.381608	-0.45978	-0.334787	-0.395947	-0.490566	-0.369325	0.308936	0.278767	-0.358275	0.279846	-0.390911	-0.377445	-0.489795	-0.382431	-0.37061	-0.362489	-0.374413	-0.39898	-0.3813
Pyrimidine_catabolism	0.367187	0.425738	0.42014	0.324639	-0.0255612	0.0821167	0.0885025	0.269175	0.164263	0.275539	0.0686431	0.0783656	0.263304	0.345065	0.265337	0.411845	0.061254	0.285162	0.0743377	0.0780085	0.224678	0.422818	0.273404	0.259774	0.161949	0.267557	0.191339	0.296045	0.14036	0.344835	0.0706803	0.35588	-0.0455951	0.223097	0.236035	0.0742866	0.195691	0.27604	0.22083	0.274183	0.396732	0.377625	0.220598	0.286479	0.232026	0.357961	0.0858996	0.204029	0.203784
Pyrimidine_salvage_reactions	0.257794	0.25487	0.336937	0.275744	0.0378089	0.22593	0.137461	0.111791	0.187353	0.0496362	0.230047	0.21867	0.205741	0.355125	0.132536	0.291441	0.208351	0.0481037	0.167757	0.223318	0.153462	0.294865	0.162207	0.202868	0.330355	0.104145	0.261113	0.280701	0.134848	0.294703	0.233671	0.316196	0.024432	0.189288	0.163134	0.102707	0.255322	0.167349	0.2569	0.0487743	0.314247	0.209791	0.151559	0.10703	0.173261	0.264456	0.109808	0.151226	0.185626
Synthesis_of_IPs_in_the_nucleus	0.335937	0.10788	-0.0479067	0.00969821	-0.46733	-0.0547254	0.11836	0.0841253	-0.355459	0.323633	0.0911367	0.0968609	0.208839	-0.372277	0.0802277	0.0824228	0.215127	0.322425	0.098037	0.105348	-0.46345	0.327028	0.0901507	-0.372706	-0.353597	0.098452	0.330193	-0.362342	-0.37388	0.209679	0.23639	0.234094	0.268515	-0.0491578	-0.383174	0.350284	0.263855	0.0891081	0.225065	0.0883149	-0.0940643	0.177708	-0.381619	0.0967444	0.102074	0.264335	0.256213	0.108026	-0.369217
Synthesis_of_pyrophosphates_in_the_cytosol	0.421341	0.404624	0.0380503	0.232736	0.268064	0.233845	0.234192	0.14648	-0.0850863	0.412753	0.291551	0.384758	0.197418	0.23389	0.222527	0.280325	0.37093	-0.0890124	-0.0654063	0.388814	0.204283	0.414191	-0.0808388	-0.114403	-0.0957314	0.116969	0.105309	0.19394	0.200586	0.375752	0.216305	0.111436	0.221168	0.268337	0.0464856	-0.0658795	0.235695	0.384801	0.380863	0.382581	0.0898785	0.180044	0.0978612	0.112809	0.226135	0.236726	-0.0603356	0.303705	-0.102206
Synthesis_of_IP3_and_IP4_in_the_cytosol	-0.0700426	-0.0357057	-0.0407805	-0.126244	-0.0344733	0.00613069	-0.101904	-0.114535	-0.0712542	-0.0373521	-0.084921	-0.057075	-0.024603	-0.0771183	0.00237002	-0.0288227	-0.0872341	-0.0828064	-0.131694	-0.0765695	-0.09822	-0.0107337	-0.0466066	-0.0637037	-0.0257833	-0.07335	-0.119286	-0.088544	-0.0494547	0.0338086	-0.0778851	-0.0342942	-0.045133	0.0279081	-0.136764	-0.0868528	-0.0828096	-0.0259568	-0.00841649	-0.00571073	0.0479704	0.0360394	-0.0334752	0.0223142	-0.0826658	-0.0678837	-0.0880218	0.0507817	-0.113075
map_kinase_inactivation_of_smrt_corepressor	0.228924	0.121899	0.0331216	0.033602	-0.0203663	0.0151174	0.0451923	0.0283315	-0.028991	-0.00247674	-0.0164841	0.0498278	0.0701496	0.0685061	0.0198179	0.0193326	0.00530418	0.0303052	0.0151218	0.0220779	0.080302	-0.0617633	0.0692226	0.0388866	0.0909144	0.027181	0.0113437	0.0530455	0.0832379	0.0293176	0.0623486	-0.0295259	0.108703	0.0834746	0.0612667	-0.0291029	0.0127845	0.0128154	0.086608	0.0299883	-0.00962189	-0.0368944	0.0322114	0.0740328	-0.0304658	0.0100644	0.0842864	0.0850184	0.0216431
hiv-1_nef__negative_effector_of_fas_and_tnf	0.0852597	-0.0408301	0.04893	-0.0415639	0.0816144	0.0122424	-0.0431597	0.047678	0.0192957	0.0552852	0.0850607	0.0362778	0.109504	0.0541592	0.0108124	0.0700976	0.0615704	0.0527508	0.011843	0.0244202	0.0976416	0.0109508	-0.0103329	0.0161146	0.093092	0.088169	0.145695	0.0888722	0.0462557	0.135559	0.0375045	0.0801822	0.0691107	0.0182157	0.0568544	0.0504056	0.0467308	0.0525208	0.0637765	0.048546	0.00796421	0.0284082	0.0123363	0.050316	0.0449768	-0.0118055	0.0664227	0.00956048	0.0616669
Potassium_transport_channels	-0.299981	-0.32934	-0.163496	-0.169151	0.132812	-0.110544	-0.10679	0.118893	-0.104158	-0.313621	-0.179253	-0.316055	-0.123925	-0.33679	-0.326202	-0.312533	-0.323447	-0.321361	-0.305194	-0.10726	0.0628035	-0.301942	-0.0472511	-0.13037	-0.317992	-0.306859	-0.0478064	-0.345142	-0.15035	-0.137272	-0.18012	-0.179174	-0.273783	-0.306151	0.409237	-0.346679	0.140507	-0.312151	-0.180725	-0.188492	-0.127127	-0.217797	0.146876	-0.115957	0.258028	-0.0170033	-0.102653	0.245287	-0.120694
Activation_of_G_protein_gated_Potassium_channels	-0.0628371	-0.0781887	-0.00970591	0.0514449	-0.0435044	-0.0787376	0.0386278	0.0743664	0.118668	-0.0645135	0.0370365	-0.054247	-0.0753084	-0.0865311	0.000576051	-0.0894053	0.0218557	-0.130126	-0.0127067	-0.0607353	0.010128	-0.0563172	0.0103025	-0.0781994	0.0484795	-0.0761951	-0.0320843	0.0329743	0.033849	0.0574099	-0.0202217	0.0143943	-0.106076	-0.04649	0.0965313	-0.0342112	0.011826	-0.115494	-0.0907713	-0.134637	-0.0481321	-0.0150104	0.0352802	0.0100812	-0.000963658	0.00461726	-0.0864907	0.0185065	0.0321826
Inhibition__of_voltage_gated_Ca2__channels_via_Gbeta/gamma_subunits	-0.0628371	-0.0781887	-0.00970591	0.0514449	-0.0435044	-0.0787376	0.0386278	0.0743664	0.118668	-0.0645135	0.0370365	-0.054247	-0.0753084	-0.0865311	0.000576051	-0.0894053	0.0218557	-0.130126	-0.0127067	-0.0607353	0.010128	-0.0563172	0.0103025	-0.0781994	0.0484795	-0.0761951	-0.0320843	0.0329743	0.033849	0.0574099	-0.0202217	0.0143943	-0.106076	-0.04649	0.0965313	-0.0342112	0.011826	-0.115494	-0.0907713	-0.134637	-0.0481321	-0.0150104	0.0352802	0.0100812	-0.000963658	0.00461726	-0.0864907	0.0185065	0.0321826
Ca2__activated_K__channels	-0.380703	-0.179118	-0.356334	0.0681559	-0.381032	-0.164428	-0.368223	-0.0454748	-0.0288439	-0.126058	-0.161756	-0.16104	-0.167853	-0.157904	-0.174867	-0.137543	-0.373905	-0.124842	-0.369863	-0.161432	-0.183676	-0.120778	0.184024	-0.272082	0.0121155	-0.136073	-0.173772	-0.410689	-0.201285	-0.268525	-0.173007	-0.138883	-0.157269	0.0431481	-0.300521	-0.370298	-0.0977968	-0.254953	-0.130642	-0.126867	-0.154141	-0.369528	0.0984748	-0.36384	-0.165905	-0.155375	-0.147531	-0.200298	-0.381576
Role_of_Calcineurin-dependent_NFAT_signaling_in_lymphocytes	-0.0208515	-0.0534719	-0.0393199	-0.0286549	-0.00402059	-0.023328	-0.0132789	-0.0398861	-0.0430869	-0.013539	-0.0329888	-0.0416102	-0.0612461	-0.00579388	-0.0634386	-0.0330091	-0.0233394	-0.0127303	-0.0317626	-0.0312496	0.0381048	-0.0271843	-0.0245659	0.0202292	-0.0223378	-0.00212109	0.0131311	-0.0041924	-0.0405115	0.0020802	-0.0076553	-0.0239998	-0.00428832	-0.036319	0.0444453	-0.0347501	-0.0430965	-0.00672933	-0.0363024	-0.0163872	-0.0540754	-0.00639304	0.0237698	0.00489549	-0.0364414	-0.0169471	-0.0365193	-0.01882	-0.0320354
Urokinase-type_plasminogen_activator_(uPA)_and_uPAR-mediated_signaling	0.0894047	0.0879443	0.0982215	0.107715	0.0244367	0.0776467	0.0634974	0.123825	0.0868021	0.0421227	0.0829087	0.0910804	0.0919547	0.0709284	0.0970749	0.0698369	0.128764	0.0512821	0.0909248	0.129505	0.117037	0.032303	0.0960678	0.0971808	0.082082	0.038197	0.0492868	0.0857926	0.0829047	0.0683023	0.0649896	0.0557768	0.105855	0.0622258	0.128349	0.0522843	0.0701401	0.116497	0.0554041	0.0618942	0.0953821	0.0759166	0.148911	0.0779021	0.0511349	0.0503393	0.138342	0.113201	0.0319757
ARMS-mediated_activation	-0.0498881	0.0995698	-0.0145055	0.0604846	-0.077738	0.0549238	0.00797044	-0.0664109	0.0902595	-0.130038	-0.0340051	-0.0306541	-0.0110227	-0.0260965	-0.0226506	0.0719984	-0.0131943	0.0476592	-0.0876667	-0.0626503	0.013051	-0.0381691	-0.0132207	0.137947	0.00804262	-0.0788214	-0.0143313	0.156843	-0.0649442	0.0145629	-0.0903518	0.0549669	-0.00987974	-0.070639	0.158164	-0.0284041	0.0788423	0.0952246	-0.0531575	-0.0215734	0.0511838	0.100354	-0.053387	-0.0583387	-0.0324717	0.000587014	-0.0353548	-0.0568518	-0.0195781
Frs2-mediated_activation	0.0260938	0.0378847	-0.0776527	0.0155162	-0.0635469	0.0238372	-0.00721856	-0.0709385	0.0722145	-0.0836878	-0.0066673	-0.0731525	-0.0477203	-0.0147288	-0.054954	0.0526237	-0.00962973	0.0343195	-0.0623976	-0.0608726	-0.0225072	-0.0150694	-0.0251109	0.091968	0.0177241	-0.0866382	0.0003785	0.0885745	-0.0699021	0.0371172	-0.0615623	0.0206709	-0.0193055	-0.0369197	0.116075	0.00260252	0.0824449	0.0295718	-0.0442075	0.0450846	0.0113654	0.0457675	-0.0729753	-0.0274481	-0.0168225	-0.0126328	-0.055638	-0.0659956	-0.0119529
p38MAPK_events	-0.035363	-0.0863179	-0.0572943	-0.0829947	-0.0676807	-0.0623792	-0.0137253	-0.15035	-0.159272	-0.175216	-0.10541	-0.0665487	-0.138108	-0.0800023	-0.112808	0.125599	-0.00641155	-0.115808	-0.156617	-0.123783	-0.0166972	-0.0825117	-0.100387	-0.00623716	-0.0263748	-0.0204746	-0.0303284	0.112854	-0.11027	0.0121191	-0.156531	-0.043102	0.124652	0.098867	-0.0455926	-0.121456	-0.0978875	-0.0875841	-0.0235704	-0.0851111	0.025559	-0.0912042	-0.112464	-0.0667968	-0.129498	-0.0201491	-0.0271196	-0.0127261	-0.0235202
Signalling_to_p38_via_RIT_and_RIN	-0.040446	0.140791	0.035761	0.0620952	-0.0681116	0.0779154	0.0696258	-0.00277438	-0.0114008	-0.0874527	0.0427655	0.0187038	0.0636875	0.0185311	-0.0306359	0.029219	-0.0328563	0.104879	-0.0745061	-0.0728016	0.0651568	0.0353047	0.0356226	0.155889	0.0353986	-0.0763322	0.0329412	0.0679203	-0.0551338	-0.0199074	-0.0822069	0.015276	0.0438653	-0.0854907	0.216358	0.0468092	0.120976	-0.000610844	0.0222519	0.081975	-0.0266999	0.0740794	-0.0364384	-0.0794943	0.0253164	0.0388119	-0.065389	-0.0896699	0.0232022
NGF-independant_TRKA_activation	-0.0588372	-0.107012	-0.165407	-0.313969	-0.0763658	-0.100544	-0.129093	-0.165304	-0.19223	-0.114893	-0.102313	-0.150427	-0.0559241	-0.0649123	0.0292864	-0.164406	0.0748858	-0.254985	0.04303	0.0338505	0.0970645	-0.0882364	-0.0187929	-0.278509	-0.16308	-0.150915	-0.16509	-0.274236	-0.0971721	-0.135111	-0.0747045	-0.101792	-0.112475	-0.106486	0.134903	-0.170358	-0.327242	0.0177996	-0.0854036	-0.113032	-0.0960787	-0.147787	-0.0267887	-0.116877	-0.142242	-0.130849	0.0420168	-0.0178295	-0.16809
TRKA_activation_by_NGF	0.00704914	0.140192	-0.260686	0.129629	-0.264982	0.121269	0.13473	-0.0148053	0.120253	-0.311152	0.117767	-0.278174	-0.0298602	0.103077	0.100144	0.114995	0.106249	0.0837723	-0.26956	-0.271299	0.0763498	0.0978959	0.109864	0.0982797	0.115661	-0.278743	0.113575	-0.0260973	-0.0725592	-0.038491	-0.280546	-0.279665	-0.249166	-0.283357	0.42721	0.125534	0.0132487	-0.0152404	0.0902087	-0.0155959	-0.0406983	0.0973116	0.0609442	-0.280926	-0.268132	0.0214208	-0.270943	0.0748298	0.110395
Signalling_to_RAS	0.086723	0.0979146	-0.0451405	0.0505548	0.104881	0.0247477	0.066004	0.0708169	0.033106	-0.0641615	0.0304475	-0.0287804	-0.0109692	0.10042	0.103052	0.0801565	0.0161586	0.0460694	0.0493606	-0.0568053	0.134586	0.0231561	0.180061	0.0918197	0.100349	0.030479	0.170015	0.0880097	0.00811672	0.0733249	-0.0623149	-0.0617595	0.00103042	-0.0245367	0.184948	0.0935835	0.0949398	0.115679	0.0628869	0.0829011	-0.0281467	0.0289344	-0.00438467	0.0485269	-0.0524374	0.0331915	0.0367723	0.0298832	0.0773597
neuroregulin_receptor_degredation_protein-1_controls_erbb3_receptor_recycling	-0.083658	0.070903	0.080483	-0.0775227	0.0859075	0.193513	-0.091407	0.0657831	0.0447349	0.249789	0.0300779	0.0582419	0.164973	-0.115569	0.0469464	0.205149	0.123869	0.150452	0.0739866	0.0976181	-0.158593	0.0297504	0.0679331	0.0318458	-0.087369	-0.0913679	0.0748271	0.176078	0.177269	0.153839	0.142166	0.000554344	-0.0805062	0.165935	0.162832	-0.105846	0.18648	0.150478	0.171109	0.00447339	0.104038	-0.0255607	0.0874311	0.0310931	0.0349373	-0.0606204	0.0704658	0.10155	-0.103768
Class_IB_PI3K_non-lipid_kinase_events	0.0931198	0.1523	0.153191	0.148219	0.0529717	0.0494772	0.187218	0.102631	0.0610056	0.0738825	0.0489433	0.139201	0.0431054	0.0676434	0.033044	0.0669769	0.157367	0.042099	0.10712	0.0661084	0.144953	-0.136122	0.10269	0.0579082	0.00412737	0.147703	0.0805265	0.0689246	0.0911112	0.0624647	0.0760203	0.0863691	0.127584	0.0505155	0.21884	0.0847479	0.0749049	0.0600309	0.115574	0.0985747	-0.0328597	-0.0127189	0.0894025	0.0801573	0.0643045	0.0400944	0.116841	0.0939164	0.0432987
IL5-mediated_signaling_events	0.0158966	-0.0743106	-0.0730481	0.0336792	0.0024011	0.0698888	0.0218053	0.0466611	0.0619757	0.0206437	0.0392684	0.0201411	-0.0348693	-0.00138995	0.0213231	-0.00414557	-0.0414384	0.0731784	0.0506915	0.0588097	0.0754828	0.0154706	0.0423663	0.0100974	-0.0327973	-0.00327222	0.0160011	0.0434662	0.0103867	0.0564478	0.057654	-0.0280657	0.0783721	0.019082	0.193439	0.0147493	0.00412337	0.0362849	-0.0350978	0.0594031	-0.0457234	-0.0119547	0.214427	0.063929	0.0495697	-0.031628	0.022088	0.101012	0.0512488
Viral_mRNA_Translation	0.221908	0.313913	0.299999	0.271612	0.193701	0.0649294	0.300508	0.0623164	0.0799666	0.246728	0.0478006	-0.125696	0.0490943	0.041807	-0.0340182	0.156734	-0.063852	0.307564	-0.0662373	-0.101497	-0.112045	0.314301	-0.12405	0.135656	0.0779036	0.156097	0.170886	-0.0880271	-0.0312509	0.0595251	0.0944211	0.316296	0.0548996	-0.00317385	-0.0686019	0.194641	0.318039	-0.12194	0.0506642	0.239274	0.0462295	0.291123	-0.175473	0.0618904	0.0104483	0.359287	0.00273985	-0.201414	0.284264
vRNA_Synthesis	0.203135	0.260147	0.208769	0.213436	0.201705	0.201997	0.239509	0.197044	0.205804	0.238276	0.187885	0.195016	0.194448	0.159553	0.191586	0.182796	0.185009	0.219131	0.22759	0.235518	0.133532	0.214445	0.236296	0.215157	0.185929	0.211635	0.183862	0.184391	0.113774	0.179568	0.187929	0.20571	0.246001	0.171546	0.0845755	0.208251	0.241457	0.237395	0.202613	0.236949	0.167506	0.182552	0.0757189	0.246454	0.219955	0.252021	0.227593	0.0762291	0.197303
Viral_RNP_Complexes_in_the_Host_Cell_Nucleus	0.224772	0.225548	0.227485	0.234894	0.221635	0.225042	0.257621	0.207261	0.206861	0.20024	0.205035	0.21288	0.176832	0.179551	0.207272	0.214931	0.208042	0.220662	0.231517	0.239746	0.156664	0.232191	0.223862	0.18953	0.208138	0.227515	0.197026	0.200534	0.126995	0.200158	0.188837	0.223405	0.253099	0.200507	0.0971174	0.239212	0.248656	0.220889	0.206283	0.21157	0.178426	0.168578	0.075802	0.209579	0.233433	0.235311	0.226346	0.0741411	0.198025
NEP/NS2_Interacts_with_the_Cellular_Export_Machinery	0.0740709	0.0607316	0.0204616	0.0237001	0.0432914	0.032106	0.0597245	0.0692876	0.0315664	0.130823	0.0439427	0.0784175	0.0481092	0.0569614	0.0397666	0.0690582	0.0321395	0.108916	0.0512947	0.0688664	0.0180178	0.0630345	0.101671	0.0541234	0.0660973	0.102764	0.0240355	0.110947	0.000601274	0.0253558	0.102675	0.127085	0.0753905	0.0621664	-0.0352175	0.0808164	0.156619	0.126533	0.07094	0.0997337	0.00293608	0.0272996	-0.0656068	0.0916237	0.0734875	0.071022	0.0905083	-0.070611	0.0148721
Transport_of_HA_trimer__NA_tetramer_and_M2_tetramer_from_the_endoplasmic_reticulum_to_the_Golgi_Apparatus	0.259209	0.263637	0.15238	0.15507	0.288778	0.258033	0.165535	0.236077	0.261969	0.242338	0.279506	0.283707	0.257327	0.218673	0.231267	0.233999	0.256133	0.242905	0.240959	0.285992	0.19641	0.159498	0.231568	0.219126	0.241999	0.251655	0.274772	0.213978	0.209061	0.220264	0.236375	0.275256	0.304444	0.265997	0.146334	0.257534	0.271727	0.270516	0.254991	0.271531	0.119376	0.227392	0.155097	0.285764	0.257004	0.285878	0.264934	0.142256	0.221151
Assembly_of_Viral_Components_at_the_Budding_Site	0.269866	0.275762	0.12748	0.15491	0.299365	0.274452	0.158793	0.240172	0.272583	0.258372	0.26991	0.253105	0.255223	0.230817	0.23529	0.254159	0.264944	0.234353	0.215827	0.293378	0.216399	0.179685	0.207853	0.223347	0.228957	0.255795	0.270093	0.207627	0.218066	0.233424	0.211232	0.252786	0.278619	0.269924	0.179379	0.275909	0.254343	0.263604	0.250453	0.279824	0.145031	0.227063	0.179109	0.280325	0.260647	0.307635	0.26865	0.157938	0.225084
Budding	0.248742	0.25371	0.181101	0.184412	0.251704	0.247614	0.194644	0.225554	0.251228	0.231277	0.240069	0.24586	0.214665	0.207182	0.220432	0.223239	0.214251	0.232005	0.225593	0.247558	0.183818	0.174131	0.216206	0.208056	0.231466	0.24082	0.235674	0.198421	0.16326	0.20908	0.220394	0.238332	0.26647	0.224773	0.133727	0.247275	0.261907	0.230387	0.230846	0.230229	0.126086	0.184385	0.12932	0.246024	0.246462	0.267094	0.255026	0.114725	0.210359
Packaging_of_Eight_RNA_Segments	0.226494	0.232866	0.207906	0.212645	0.230332	0.225703	0.222285	0.202783	0.229341	0.207993	0.217181	0.223878	0.190224	0.183183	0.197283	0.200322	0.195703	0.209045	0.210987	0.230151	0.157944	0.201659	0.201143	0.18471	0.209398	0.217725	0.213138	0.183306	0.142847	0.1854	0.204974	0.217136	0.249438	0.201069	0.107501	0.225602	0.240435	0.212067	0.207249	0.211646	0.153826	0.159963	0.104301	0.22276	0.224144	0.247149	0.233585	0.087326	0.187659
Formation_of_annular_gap_junctions	-0.017281	-0.0157486	0.0514227	0.105762	0.0128272	0.0108342	0.043278	-0.0756742	0.0320168	-0.0533564	0.0495792	-0.041189	0.063259	-0.0140627	-0.0422749	0.115565	0.0401168	0.0751497	-0.106982	0.064419	-0.0500915	0.0261541	-0.0550431	0.0143223	0.00805857	0.0480091	-0.0313066	0.0187385	-0.0329623	0.0582669	0.0258592	0.0970169	0.036841	-0.0988409	-0.0349036	0.0343092	0.0260554	-0.0986141	0.0340739	-0.0547464	-0.00827501	0.00907973	0.0519801	-0.0388146	-0.120912	0.0436303	0.0609151	-0.0766123	0.0569981
Transport_of_connexins_along_the_secretory_pathway	-0.227012	-0.226909	-0.21257	-0.227115	-0.238679	-0.231432	-0.214215	-0.249472	-0.233128	-0.248649	-0.243921	-0.245566	-0.261806	-0.256924	-0.25163	-0.247467	-0.25199	-0.248341	-0.241762	-0.22732	-0.279178	-0.231792	-0.24978	-0.26453	-0.245206	-0.242687	-0.253326	-0.258106	-0.295676	-0.269002	-0.246696	-0.241351	-0.221667	-0.263502	-0.26304	-0.234156	-0.234259	-0.250859	-0.254611	-0.249266	-0.274244	-0.28627	-0.237702	-0.244281	-0.23688	-0.216579	-0.231021	-0.282313	-0.255022
Gap_junction_assembly	-0.148528	-0.146333	-0.131364	-0.143222	-0.156843	-0.150458	-0.127754	-0.171916	-0.151406	-0.173027	-0.165876	-0.163035	-0.187361	-0.185116	-0.178106	-0.172924	-0.176401	-0.171802	-0.158653	-0.150089	-0.212425	-0.152613	-0.172255	-0.188053	-0.16712	-0.165825	-0.174649	-0.184904	-0.226035	-0.197172	-0.169726	-0.164225	-0.141271	-0.184459	-0.217488	-0.153752	-0.148685	-0.174711	-0.178891	-0.174591	-0.200882	-0.213293	-0.20716	-0.167165	-0.153134	-0.133406	-0.144787	-0.245593	-0.178627
Oligomerization_of_connexins_into_connexons	-0.195806	-0.194464	-0.179918	-0.193426	-0.20547	-0.199084	-0.179294	-0.219096	-0.200098	-0.218817	-0.212131	-0.212201	-0.232315	-0.228443	-0.222759	-0.217907	-0.221905	-0.218185	-0.208356	-0.196517	-0.252875	-0.199603	-0.219457	-0.234303	-0.214167	-0.212438	-0.221346	-0.229324	-0.267621	-0.240703	-0.21614	-0.210971	-0.190258	-0.232411	-0.245624	-0.202014	-0.200142	-0.221102	-0.224897	-0.220563	-0.245689	-0.256833	-0.227625	-0.213597	-0.202894	-0.182679	-0.195833	-0.26951	-0.22455
Gap_junction_degradation	-0.00490271	-0.00239045	0.0594902	0.100477	0.0198464	0.0183476	0.0493606	-0.0571466	0.0522236	-0.0325056	0.0488752	-0.0265388	0.0568336	-0.00263665	-0.0306481	0.123389	0.0536093	0.0856299	-0.0807333	0.0787715	-0.0432504	0.0307614	-0.0393927	0.0150779	0.0137086	0.0535371	-0.0195465	0.0202875	-0.0257171	0.0580398	0.0285196	0.109085	0.0483145	-0.0784894	-0.0201021	0.0434939	0.0328308	-0.0574465	0.0344207	-0.0338847	0.0106856	0.0123473	0.0611102	-0.0250975	-0.0910524	0.0538366	0.0818917	-0.0587122	0.0575011
Microtubule-dependent_trafficking_of_connexons_from_Golgi_to_the_plasma_membrane	-0.170684	-0.169019	-0.154256	-0.166756	-0.179651	-0.173289	-0.152023	-0.194242	-0.174317	-0.194545	-0.187678	-0.186042	-0.208693	-0.205606	-0.199365	-0.19405	-0.197831	-0.19375	-0.181967	-0.171925	-0.231625	-0.174542	-0.194628	-0.209911	-0.189233	-0.187788	-0.196649	-0.205884	-0.245429	-0.217909	-0.191761	-0.186314	-0.164488	-0.207163	-0.23104	-0.176376	-0.172882	-0.196729	-0.200727	-0.196466	-0.222334	-0.233911	-0.21738	-0.189058	-0.17638	-0.156635	-0.168714	-0.257586	-0.200217
Netrin-mediated_signaling_events	-0.00915504	-0.0511337	-0.0475931	0.0250728	0.0533112	0.0592819	-0.00622033	0.0824337	0.013087	0.0240222	0.000484615	0.0512215	0.00633117	0.0556633	0.0754583	-0.0236593	-0.0190417	0.0471524	0.0882729	0.0849547	0.0097502	-0.000103043	0.0458416	0.00338071	0.0120271	0.0387315	-0.0272237	0.0756588	0.0425667	0.0209713	-0.0274094	0.00749415	0.074016	0.00416259	0.0208538	0.0352978	0.0441077	0.0155695	0.00443022	0.00463336	-0.0100414	-0.0464112	0.00697543	0.0135286	-0.0181358	-0.012513	0.0638569	0.0421822	0.061785
role_of_mef2d_in_t-cell_apoptosis	-0.0718997	0.0171171	0.127212	0.0244915	-0.03351	0.0129245	0.0091343	-0.0190151	0.029299	-0.0467795	-0.0627442	-0.0134332	0.101013	0.0082002	-0.0664586	-0.0310207	-0.0036499	-0.0129994	-0.0152252	-0.0341302	0.14928	0.0149524	-0.00213414	-0.00609298	0.057492	-0.0300585	-0.0137227	-0.0437189	0.0930178	0.0180229	-0.00506348	-0.0131958	0.00997083	-0.0958609	0.130733	0.0453519	-0.0209864	0.0295703	-0.0354924	-0.0379968	0.0775848	0.158272	0.12575	0.0197214	-0.0419116	0.034562	-0.031386	0.107962	0.0825263
stat3_signaling_pathway	-0.131253	-0.0477971	-0.0098669	-0.0801554	-0.0784327	-0.0594416	-0.0509112	-0.0402922	-0.0843595	-0.111629	-0.0537889	-0.0317956	-0.092269	-0.104516	-0.064784	-0.0679088	-0.0460136	-0.0789623	-0.034877	-0.0494187	0.149083	-0.0736212	-0.0668001	0.0210015	-0.0820772	-0.0153561	-0.0960929	-0.0404962	-0.0744983	-0.074788	-0.0443045	-0.0920131	0.0102296	-0.0761746	0.240838	-0.0375437	-0.0326646	-0.0968005	-0.0959443	-0.0796145	-0.06004	0.215848	0.23864	-0.0635543	0.0643636	-0.0537115	-0.0898561	0.154404	0.0920542
IL2_signaling_events_mediated_by_PI3K	0.0300526	0.0230949	0.0138241	-0.0379438	0.0461347	0.0515544	-0.0212151	-0.0140648	-0.0609543	0.0188696	-0.0144085	-0.00399129	0.013257	0.0186639	-0.0191257	-0.0432817	-0.0260681	0.033245	-0.0100243	0.0192231	0.062177	-0.0194287	-0.00958971	0.0807789	-0.0414079	0.00577543	0.00527188	0.00444029	0.07271	0.00366104	0.0151443	0.0146456	0.0611756	0.0115497	0.0527158	-0.046493	0.0118405	0.0531015	-0.015405	0.0221811	-0.0307715	0.0174025	0.0784257	0.025483	-0.0189144	-0.0167451	0.0677161	0.0508634	-0.00996771
Processing_of_DNA_double-strand_break_ends	-0.0139026	0.0179913	0.0244566	0.023679	0.0227222	0.140959	0.0308751	-0.0175193	0.15048	0.145958	0.0135466	0.135416	-0.0648401	0.117728	-0.0177369	0.0044434	0.101797	0.123808	-0.0400074	-0.0345357	0.00857545	0.0126025	-0.046134	-0.00695863	0.136895	0.111634	0.134165	0.0296586	-0.0306622	-0.00277579	-0.0272707	0.138914	0.0419266	0.025386	-0.118175	0.11806	0.0373669	-0.0380715	0.0230527	-0.0123915	-0.0328622	-0.0269538	-0.126389	0.0826175	0.0164658	0.15152	0.1319	-0.267213	0.0991615
Assembly_of_the_RAD50-MRE11-NBS1_complex_at_DNA_double-strand_breaks	-0.151317	-0.113438	-0.138384	-0.141153	-0.0842562	-0.149631	-0.131361	-0.101291	-0.148281	0.114136	-0.0325215	-0.0214504	-0.0497494	-0.150637	-0.170718	-0.169825	-0.17301	0.115372	-0.0823191	-0.137445	-0.132213	-0.0581011	-0.089332	-0.116761	-0.0113553	-0.040284	0.0512752	-0.103733	-0.155637	-0.179268	-0.156126	-0.125194	-0.0729961	-0.0995513	-0.15875	-0.147057	-0.0748315	-0.000944734	-0.14301	-0.169579	-0.18833	-0.19224	-0.22788	-0.0859477	-0.0750721	-0.0361422	-0.0680742	-0.0677774	-0.172948
MRN_complex_relocalizes_to_nuclear_foci	-0.185541	-0.0937335	-0.1719	-0.179939	-0.188351	-0.190149	-0.170106	-0.206869	-0.188114	0.0051419	-0.200789	-0.177251	-0.217953	-0.129447	-0.212376	-0.207499	-0.210919	0.00382326	-0.177478	-0.15143	-0.212922	0.0175457	-0.170503	-0.220053	0.0100567	-0.199285	0.0180713	-0.20848	-0.245436	-0.226	-0.203482	-0.106806	-0.175107	-0.161153	-0.220535	-0.195297	-0.191373	0.0101923	-0.120576	-0.207246	-0.230641	-0.23663	-0.264366	-0.16956	-0.152147	0.0396072	-0.166612	-0.0216911	-0.210372
Assembly_of_the_RAD51-ssDNA_nucleoprotein_complex	0.0245232	0.0392886	-0.118055	-0.0115732	-0.125447	-0.0579115	-0.116093	-0.0476447	-0.0487739	0.0300409	-0.0303717	-0.0633238	-0.169673	-0.0720679	-0.0512861	-0.145712	0.00418405	-0.0808364	-0.048787	-0.1533	-0.0562871	-0.134311	-0.05716	-0.151862	-0.0675324	0.0121499	-0.0609138	-0.140712	-0.0831826	-0.14874	-0.0489659	0.0656075	-0.107435	-0.0309398	-0.221201	-0.0673604	-0.108975	-0.0558759	-0.0272298	-0.0514113	-0.16867	-0.169003	-0.226421	0.00450758	0.0371963	-0.0428349	-0.0613647	-0.206587	-0.086648
Presynaptic_phase_of_homologous_DNA_pairing_and_strand_exchange	0.119719	0.128218	-0.122741	0.0710993	-0.131477	-0.0724109	-0.119067	0.0409711	-0.0640947	0.1017	0.056672	-0.0775031	-0.171876	-0.0869095	0.037409	-0.144509	0.0780322	-0.0896895	0.040182	-0.15526	0.0137494	-0.138895	0.0335675	-0.15764	-0.082829	0.0942111	-0.0773172	-0.143924	0.00377534	-0.156582	0.0432496	-0.0378705	-0.115196	0.0524961	-0.223771	-0.0810241	-0.109223	0.0360487	0.0565792	0.0463157	-0.173271	-0.174966	-0.229417	0.0834377	0.126882	-0.0581088	-0.073418	-0.102272	-0.10066
Signaling_by_Type_1_Insulin-like_Growth_Factor_1_Receptor_(IGF1R)	-0.0452503	0.138786	-0.0996073	0.140232	0.135422	0.134587	0.0168262	0.125717	0.138693	-0.00346668	0.0778452	0.128776	-0.00742884	-0.069885	0.121712	0.0747346	-0.138795	-0.00658091	0.132594	0.134054	0.0894882	0.0838362	0.0765379	0.112868	0.136055	0.139349	-0.00436945	-0.130662	0.0380663	0.109941	0.0766626	-0.0054477	-0.0564938	0.129299	0.0881666	0.0865486	-0.228595	-0.00391027	-0.0739701	0.133962	0.127202	0.044474	0.0782141	-0.000902152	0.140782	-0.0900147	0.0111717	0.0766884	0.12161
IRS-related_events_triggered_by_IGF1R	0.0426652	0.119307	-0.0727118	0.121669	0.0925405	0.115297	0.0769858	0.102263	0.118468	0.0494824	0.0833507	0.109434	0.0373976	0.0365639	0.097396	0.0803114	-0.0981084	0.0488003	0.112572	0.114984	0.0758072	0.0917684	0.0837398	0.0872405	0.0335235	0.0991121	0.0495865	-0.00859729	0.0348559	0.0878219	0.0832143	0.0385069	0.0440209	0.0981199	0.0486085	0.0953867	-0.0363148	0.0488142	0.0209919	0.108541	0.0882704	0.0302865	0.261191	0.054972	0.117814	0.0311364	0.0693722	0.0289587	0.0944949
SHC-related_events_triggered_by_IGF1R	0.248811	0.225782	-0.102214	0.0376485	0.0332737	0.0310724	-0.027228	0.0200356	0.0445318	-0.0394732	0.00417936	0.034961	-0.0648042	0.0388092	0.0142879	-0.00919933	-0.127044	-0.054109	0.0286171	0.0304464	-0.0164193	0.0064468	0.0173973	0.0130536	0.202369	0.0334764	-0.0535589	-0.107549	0.024659	-0.00857189	-0.0057257	-0.053404	-0.0446571	0.0146869	-0.021949	0.00367636	-0.158357	-0.053878	0.0113043	0.0291684	0.0141782	-0.0404435	-0.030291	-0.0474487	0.0462401	-0.0686985	-0.0397945	-0.0403914	0.0349954
Beta-catenin_phosphorylation_cascade	-0.0670656	0.0481562	-0.00100311	-0.0780321	-0.0373874	-0.0460152	-0.0172304	0.0377675	0.0552785	0.116683	0.0872113	0.0109011	0.0311776	0.0924218	0.0970215	-0.0294011	-0.0419495	0.0325649	-0.00972695	-0.0698576	-0.0330069	-0.00515531	-0.0125133	-0.0603336	0.0126126	0.0249835	0.129384	0.102028	0.0262593	-0.0135898	-0.00863475	0.0709428	0.0580365	-0.0170265	0.0624834	-0.0349981	0.114874	0.0576559	0.0544455	0.0182505	0.0705433	-0.00691318	-0.0758638	0.150395	-0.00980128	0.00937726	-0.0538412	-0.0555408	-0.00794789
Degradation_of_beta-catenin_by_the_destruction_complex	0.100075	0.191986	0.194192	0.14898	0.166888	0.149667	0.226049	0.123415	0.184273	0.135341	0.161569	0.104587	0.184557	0.201005	0.153745	0.196904	0.0994785	0.114146	0.127744	0.0915641	0.078316	0.169219	0.112562	0.105698	0.205853	0.215139	0.231147	0.152289	0.136288	0.163968	0.0894546	0.182071	0.106321	0.081281	0.101716	0.130208	0.179126	0.104037	0.130019	0.101558	0.136552	0.169424	0.0585573	0.156015	0.121116	0.175382	0.166955	0.00176167	0.169023
Integrin_cell_surface_interactions	-0.0919058	-0.0506729	-0.0528929	-0.0520002	-0.0634014	-0.0919504	-0.0756379	-0.0289426	-0.0548192	-0.106021	-0.0524054	-0.0798096	-0.0326515	-0.0859727	-0.0761113	-0.0361259	-0.0256514	-0.0567199	-0.054959	-0.0319731	0.0246122	-0.0367687	-0.0340209	-0.0725888	-0.0569789	-0.0928147	-0.0454613	-0.0376801	0.0381076	-0.0088509	-0.0689366	-0.072959	-0.0828526	-0.0838345	-0.0108581	-0.0743595	-0.0612223	-0.0585984	-0.0228265	-0.0649633	-0.01654	0.00500251	0.0316277	-0.0179324	-0.112676	-0.0571314	-0.0223177	0.11487	-0.0455124
Hippo_signaling_cascade	-0.172452	-0.089087	-0.137386	-0.0669592	-0.142306	-0.12558	-0.0399363	-0.0977336	-0.0688918	-0.0684796	0.015527	0.0523041	-0.145595	-0.0898345	-0.0199017	-0.149388	-0.108639	-0.0762107	-0.0415912	0.0315565	-0.0121726	-0.132577	-0.00828028	0.0241373	-0.0843515	-0.169184	-0.113314	-0.068593	-0.15377	-0.171083	-0.0258149	-0.104314	-0.130574	0.0245331	0.0040732	-0.0924229	-0.0878515	0.101197	-0.10673	-0.0664056	-0.0668236	-0.125837	-0.175058	-0.0525915	-0.0626729	-0.184731	0.0260694	-0.145861	-0.0651438
Antagonism_of_Activin_by_Follistatin	0.241815	0.12122	0.227328	0.14993	0.24397	0.369339	0.153312	0.0388044	0.116193	0.109885	0.290942	0.423096	0.0310821	0.0991272	0.302388	0.215788	0.233113	0.104729	-0.171599	0.116339	0.123039	0.248045	0.108238	0.355461	-0.194109	0.366118	-0.18294	0.122619	0.3377	0.103373	0.173142	0.0494596	0.359852	0.273738	0.265865	0.114736	0.152991	0.110028	0.185422	0.109198	0.22459	0.179172	0.429784	0.111381	0.367307	0.280858	-0.167283	0.170145	0.166158
Signaling_by_Activin	0.0740528	0.180914	0.100891	0.134671	0.186303	0.244094	0.0275793	0.0368276	0.142259	0.249422	0.266101	0.27005	0.101523	0.121214	0.175072	0.120573	0.0479221	0.131428	0.0208065	0.0164519	0.120791	0.0478661	0.167578	0.162315	-0.0463567	0.187401	0.0295426	0.109842	0.0570231	0.174128	0.0681776	0.19116	0.140347	0.216389	0.143219	-0.0446867	0.166314	0.173264	0.13365	0.224656	0.101282	0.0986576	0.162565	0.0993847	0.219796	0.173437	-0.00453535	0.0930377	0.0273027
chrebp_regulation_by_carbohydrates_and_camp	0.105482	0.0207116	0.100139	0.0840516	0.0448569	0.122908	0.00842145	0.166969	0.141904	0.136868	0.172442	0.186428	0.097457	0.0963284	0.190955	0.0625541	0.0853417	0.137537	0.226601	0.137619	0.217592	0.105737	0.170603	0.139577	0.0409975	0.10146	0.136175	0.208664	0.147278	0.230951	0.238383	0.122182	0.163485	0.12356	0.163625	0.184873	0.2827	0.177247	0.1654	0.0824036	0.142067	0.104158	0.0430415	0.227082	0.120196	0.0753953	0.151232	0.0962889	0.137448
il22_soluble_receptor_signaling_pathway	-0.0201737	0.0638804	0.104446	-0.0177292	-0.0724001	0.0973937	0.0191721	0.0132612	0.0829069	-0.0667282	0.0931336	0.0959053	0.0979306	0.0570174	-0.0269394	0.00801979	0.0662605	-0.0452031	0.0578521	0.038574	0.257481	0.0396167	-0.0900468	0.146957	0.0315864	-0.0890746	0.00524767	0.0130071	0.122309	0.00253334	0.0999049	-0.119744	0.0711375	-0.0300092	0.21859	-0.0869563	-0.0185946	0.0236496	-0.0404765	0.037076	0.169601	0.143562	0.29535	0.128649	0.0370342	-0.0366169	-0.0458174	0.205041	0.170621
p53_pathway	-0.0361796	-0.0997191	-0.104762	-0.0585272	-0.0460922	-0.0601237	-0.0945886	-0.0311281	-0.0345136	0.0321129	-0.0121484	-0.0441517	-0.0295256	0.0062352	-0.0149586	-0.0779391	-0.0599886	0.0676475	-0.0280161	-0.0831083	-0.0390178	-0.080934	-0.0319621	-0.0581423	0.017533	0.00473612	0.013457	-0.00746684	-0.0912276	-0.0324078	0.0081856	-0.0479387	-0.00158199	0.00548709	-0.0163219	-0.0110367	0.022573	0.00527603	-0.0318235	0.0197395	-0.0530526	-0.063164	-0.114254	-0.0259917	-0.0484901	-0.0891797	-0.0180991	-0.125425	-0.0572235
cxcr4_signaling_pathway	0.0381043	-0.106295	-0.0705738	-0.0511071	-0.0166096	0.0791501	-0.0867154	-0.0665784	-0.0328776	0.0360983	0.0725235	-0.0283817	-0.00156665	-0.0509103	-0.00809596	-0.0759886	-0.0988236	0.0439287	-0.0414167	0.0688255	0.0980933	0.0722861	0.00558281	-0.014076	-0.0509448	0.0451994	0.0476446	0.0302899	0.0656568	0.123042	-0.0313122	0.0568687	0.0406776	-0.026571	-0.00108	-0.0484371	0.0542835	0.0740402	-0.153441	0.0517043	-0.0113234	-0.0336542	-0.0277489	0.154555	-0.0184752	-0.0345212	-0.00194209	-0.0963346	-0.0544803
erk_and_pi-3_kinase_are_necessary_for_collagen_binding_in_corneal_epithelia	-0.0433148	-0.0268679	-0.0630681	-0.0114179	-0.0101176	-0.0294045	-0.063012	-0.00579165	-0.000455673	-0.00829278	0.0114831	-0.0233853	-0.0849297	-0.0207096	-0.00893873	-0.059823	-0.0268804	-0.00436486	-0.00492579	0.0137208	-0.0636895	0.00455319	0.012011	-0.0644611	-0.0214675	-0.0240861	-0.0418247	-0.0218689	-0.0247494	-0.00197376	-0.00915545	-0.0458182	-0.0152528	-0.0679149	0.00382562	0.0178305	-0.0361669	-0.02155	-0.0202893	-0.0115655	-0.05682	-0.0515603	-0.04552	-0.00126987	-0.025268	-0.0620595	0.00428383	0.0176039	-0.013717
ccr3_signaling_in_eosinophils	0.0750102	0.0293526	0.0193408	0.0156279	0.0254607	-0.00410225	0.0147045	0.0812694	0.00115676	0.0646318	0.0846666	0.0943427	0.0180227	0.0419782	0.0766917	0.0123567	-0.00792431	0.0637721	0.0646867	0.0398791	0.0226428	0.0369525	0.0759203	0.076475	0.0878286	0.0363881	0.171059	0.0870114	0.0343991	0.134992	0.0664935	0.142301	0.099529	0.000856597	0.021165	0.0571088	0.0938232	0.103883	0.0397948	0.0442092	-0.0655442	0.103967	0.0172326	0.0518034	0.0335396	0.0571505	0.0941487	-0.0221782	0.0563003
Regulation_of_CDC42_activity	-0.0299449	-0.0964207	-0.0315527	-0.046092	-0.0121292	0.0324865	-0.0865136	0.0764362	-0.0440918	-0.081937	0.00701554	0.027749	-0.0175012	-0.0385624	-0.026257	-0.061345	0.00951277	-0.0706256	0.0660289	0.0108219	0.0485207	-0.0861287	0.0421545	-0.0293798	-0.0483675	-0.0224362	-0.0439613	0.0210865	0.0908547	0.00108798	0.0341036	-0.07472	0.0255428	0.0503714	0.0543184	-0.0128354	-0.0557193	-0.00669507	0.00400065	-0.0180872	-0.071402	-0.0917737	0.0154714	-0.0133343	0.0284135	-0.10751	-0.0569978	0.0255466	-0.0179335
IL1-mediated_signaling_events	0.0991096	0.0313206	0.0306586	0.0116425	0.0576512	0.0440362	0.037992	0.0223284	0.0643925	-0.000882527	0.0197168	0.0130641	0.050301	0.039529	0.0481065	0.0312991	0.0703387	0.0526011	0.0360398	0.0269701	0.0604271	0.0315774	0.0356235	0.0431362	0.0631073	0.0169301	0.0489092	0.0625998	0.0590372	0.0551637	0.0358453	0.0387309	0.0536381	0.0230538	0.122728	0.0344959	0.0563159	0.0833704	0.0188863	0.0550989	-0.0117121	0.00519959	0.0510764	0.0517736	0.0125692	0.0205866	0.0303056	0.105091	0.0102118
TRAIL_signaling_pathway	0.166841	0.0240322	0.153859	0.0359387	0.141293	0.111908	0.014772	0.100431	0.105139	0.139653	0.0988936	0.173385	0.0777081	0.14034	0.0107377	0.126065	0.110715	0.0985568	0.0549648	0.113323	0.076148	0.175309	0.0882712	0.147445	0.116535	0.146206	0.148949	0.143407	0.193595	0.15946	0.0490001	0.0845671	0.187599	0.0786861	0.067585	0.0327381	0.075296	0.123109	0.047063	0.165612	-0.00728743	0.070812	0.0597061	0.206221	0.11096	0.0858063	0.0849534	0.0471506	0.0461932
Ephrin_B_reverse_signaling	0.0238459	-0.0281768	-0.0328262	0.0332711	0.0430335	0.0545804	-0.0349036	0.0237724	-0.00756756	-0.00386865	-0.00415285	-0.0205721	-0.00137415	0.00867971	0.0077793	-0.0696336	-0.0223302	0.00989015	-0.00523589	0.0468259	0.0508273	0.00298614	0.0318185	-0.0133225	-0.00920667	0.009626	-0.0397814	0.0220942	0.117077	0.0237454	0.0113143	-0.037487	0.0221467	0.0302846	0.0514115	-0.00471671	-0.0342162	0.0175762	-0.0183479	-0.000807504	-0.0296222	-0.0159617	0.0639507	0.0667323	-0.0284558	-0.0153342	0.02817	-0.0107705	0.0439644
Alpha-synuclein_signaling	0.09407	0.108092	0.144108	0.127552	0.119317	0.138458	0.157591	0.0882895	0.162107	0.0462913	0.103049	0.101361	0.12424	0.146922	0.0898631	0.105139	0.109202	0.0921615	0.0992232	0.127387	0.0987029	0.105251	0.0813013	0.0989978	0.113572	0.0996565	0.115095	0.113148	0.105044	0.118852	0.0858789	0.108416	0.0995334	0.0613468	0.0781934	0.1003	0.114324	0.0822755	0.113357	0.0579369	0.101452	0.118243	0.0918235	0.0940049	0.0909043	0.10539	0.122841	0.0582038	0.127301
AP-1_transcription_factor_network	-0.105621	-0.0918376	-0.0252345	-0.0218765	-0.079596	0.0400229	0.0255788	-0.0419714	-0.0651601	-0.109012	-0.0462285	-0.0550242	-0.097358	-0.0508926	0.00909564	0.101556	0.14526	0.0738225	-0.0828675	-0.112175	0.0943336	-0.100312	-0.0433878	0.155335	-0.0948317	0.0386304	-0.113093	0.0738958	-0.095054	-0.00266199	-0.0765265	-0.0835135	0.0725481	0.0563665	0.187139	-0.0652249	-0.0396632	-0.112367	-0.107064	0.00640052	-0.0152471	-0.0107576	0.225827	-0.117964	-0.0415068	-0.0939803	-0.0839756	0.18329	0.0202945
erk1/erk2_mapk_signaling_pathway	0.0785634	0.0354351	-0.0360276	0.0436745	-0.0679918	0.00438863	-0.000398558	0.0224961	0.0388882	-0.0300509	0.0396279	0.0208339	-0.04147	0.066893	0.0470723	-0.0252381	0.0249624	0.0167118	-0.0120051	-0.0367866	0.0357662	0.0138536	-0.00811278	-0.012016	0.0453458	0.00376279	0.0364704	0.0603067	0.00658301	0.0532995	-0.0189112	-0.0263047	0.0311507	-0.0032517	0.120511	-0.0216257	0.0218072	-0.0136384	0.0460883	-0.0189575	-0.0213555	0.0925001	0.1238	-0.0262254	-0.0121033	0.0096005	-0.0338093	0.0413434	0.0127635
mechanism_of_acetaminophen_activity_and_toxicity	0.212749	0.152206	0.157427	0.159922	0.193913	0.153389	0.164386	0.167011	0.15514	0.147033	0.145503	0.152491	0.141236	0.141662	0.140635	0.129483	0.132531	0.103689	0.146651	0.182693	0.14662	0.118198	0.140365	0.190143	0.14192	0.104401	0.145407	0.0909837	0.110886	0.158231	0.178962	0.100575	0.158903	0.125012	0.328438	0.182853	0.157401	0.148071	-0.0529769	0.104756	0.131401	0.179338	0.279441	0.152609	0.155037	0.160869	0.158577	0.156801	0.144362
cyclin_e_destruction_pathway	0.0359315	0.14704	-0.0244719	0.0712636	-0.0341158	-0.0253599	-0.0077734	-0.0201714	0.0713195	0.00272951	-0.0287017	-0.0355166	-0.0873585	0.109472	-0.0013061	-0.0572668	-0.049199	0.0279702	0.0194381	-0.0290564	0.0107184	-0.0528524	0.0998906	0.0466191	0.222303	-0.0336215	0.151068	0.0847324	0.0998623	-0.0165623	-0.0294123	0.00410346	0.0589257	0.0151636	-0.0114311	-0.0292809	0.0231149	-0.033389	0.248408	0.0148093	0.00413649	-0.0931031	-0.0448114	0.053896	-0.0436109	0.00728925	-0.0475106	-0.0988085	-0.0713518
pelp1_modulation_of_estrogen_receptor_activity	0.105879	0.185831	0.178461	0.254578	0.160599	0.159428	0.243043	0.155021	0.245863	0.0578219	0.15804	0.191644	0.14771	0.111549	0.139648	0.0986897	0.153451	0.117473	0.239411	0.122604	0.158352	0.182459	0.153643	0.097387	0.122474	0.0342291	0.0194652	0.147806	0.147743	0.0654976	0.137194	0.0768517	0.213561	0.0722059	0.123368	0.192847	0.153376	0.116828	0.108388	0.0494008	0.0851235	0.150734	0.0931244	0.0519128	0.188366	0.12667	0.163933	0.0484972	0.233735
Atypical_NF-kappaB_pathway	0.0989866	0.0428073	0.110076	0.0308271	0.0851229	0.0553262	0.0704275	0.00355248	0.0309864	0.0733703	0.0211598	0.0334193	0.0207024	0.00720769	0.012507	0.0432302	0.0535045	0.0863815	0.0533499	0.0318629	0.0940212	0.113285	0.0200191	0.0966099	0.0220611	0.0195168	0.0692756	0.0828831	0.026826	0.0453327	-0.00445536	0.0200812	0.0952538	0.0435114	0.112232	0.0552646	0.0211243	0.117945	-0.00363636	0.0548041	0.0249786	0.0802389	0.0695574	0.0728157	0.0720162	0.0679517	0.0592667	0.0615584	0.0577214
Acyl_chain_remodelling_of_PE	0.0837645	0.0606651	0.00472168	0.0333469	0.17513	0.0945014	0.0690886	0.109833	0.0948561	-0.0312286	0.0188269	0.0520753	0.118703	0.127872	0.0333543	0.00870713	0.0260977	-0.144378	0.0827088	0.0782532	0.0727403	0.00562521	0.0509324	0.0913	0.0694468	0.00379926	-0.00162905	0.0642758	0.117486	0.129513	0.00781691	0.182168	0.0304569	0.112166	0.0797387	0.0672523	0.0187951	-0.0444867	0.00212123	-0.0294503	0.0716362	-0.0155887	0.0715952	-0.0279425	0.0369341	0.0243945	-0.0673557	0.094289	0.0299179
Hydrolysis_of_LPE	0.468209	0.483576	0.462144	-0.340287	0.468826	0.464251	0.464817	0.45829	0.4642	0.477357	0.268642	-0.358583	0.45351	0.453458	0.45166	0.401241	0.249009	0.266894	0.461528	0.461322	0.445235	0.465536	0.461219	0.445235	0.463172	0.467181	0.462864	0.401549	0.444978	0.461425	0.461373	0.476072	0.426014	-0.440918	0.416197	0.464149	-0.351594	0.463892	0.409875	0.463121	0.469083	0.450118	0.407614	-0.358789	0.466153	0.294031	0.459472	0.411315	0.45166
Synthesis_of_PE	0.231264	-0.444597	-0.494379	0.241364	-0.45768	0.229799	-0.47227	-0.473293	0.234451	0.213352	-0.473507	-0.472609	-0.473984	0.188398	-0.477372	0.205102	0.195825	-0.490716	-0.471146	-0.469197	-0.488299	-0.460959	-0.476243	0.188912	-0.492173	0.222603	-0.490999	-0.488245	0.142783	-0.464253	-0.47296	0.216153	-0.440586	0.200451	0.112175	-0.467354	0.245578	-0.461681	0.207081	0.211836	-0.476455	-0.461077	0.103207	-0.474864	-0.469918	-0.459166	-0.468318	0.0858598	-0.473381
Synthesis_of_PA	0.105488	0.140754	0.100684	0.0732667	0.179602	0.0551434	0.113628	0.0717007	0.0708118	0.0685801	0.0236088	0.0923343	0.118427	0.189495	0.0510989	0.0957528	0.0778484	-0.00216514	0.0644846	0.106786	0.0858944	0.104825	0.0040568	0.107663	0.210067	-0.0910444	0.0911466	0.118397	0.182408	0.0895368	0.0397937	0.183593	0.0462208	0.194098	0.148892	0.0571873	0.0368482	0.066753	0.0368985	0.0941949	0.103024	0.0782195	0.0898222	-0.0181145	0.0560201	0.0988512	-0.100487	0.135018	0.027697
prion_pathway	-0.0447645	-0.0294677	-0.0592463	0.0261589	-0.0200629	-0.0422978	-0.033504	-0.0606404	-0.0217	-0.0995396	0.0578374	0.0222009	-0.103947	-0.0853425	-0.0402843	-0.0588187	-0.0639698	-0.111281	-0.0356752	-0.0446275	-0.0677927	-0.0375753	0.00630049	-0.0485528	-0.071736	-0.0374613	-0.00963708	-0.112043	-0.0339266	-0.11472	-0.0632996	-0.0550303	-0.0737204	-0.0929149	-0.0829649	0.0572607	-0.0460722	-0.0573142	-0.0299131	-0.10383	-0.0355912	-0.00299271	-0.102984	-0.0474479	-0.0693393	-0.0187846	-0.0278875	-0.139824	-0.044773
Synthesis_of_PC	-0.295612	0.379672	0.473699	-0.262321	-0.292799	-0.265714	-0.255006	-0.319295	-0.2988	-0.308615	-0.278715	-0.279091	-0.32154	-0.323548	-0.319973	0.46602	-0.309904	-0.400445	-0.299383	-0.292155	-0.286894	-0.297582	-0.308244	-0.26559	-0.304812	0.463798	-0.307126	0.47166	-0.33695	0.358818	-0.309792	0.458982	-0.233343	0.462942	-0.307756	-0.302209	-0.27193	-0.307781	0.45824	-0.309246	-0.330803	-0.33306	0.432073	-0.312872	-0.268761	-0.256986	-0.301853	0.407262	-0.31397
tnf/stress_related_signaling	0.0605802	0.025392	0.0530838	0.0428268	0.0842999	0.0721357	0.102227	0.0952269	0.0590388	0.057682	0.111791	0.0615913	0.0165174	0.0978948	0.0684943	0.117048	0.115433	0.105076	0.0411505	0.042784	0.129018	0.0268135	0.0811772	0.0937911	0.0849617	0.0760161	0.0479744	0.104997	0.0468118	0.15665	0.0711016	0.0137834	0.181594	0.107316	0.153856	0.102303	0.0685819	0.0377413	0.0813674	0.0842479	0.0261829	0.0133182	0.0423379	0.0648087	0.0708901	0.0395737	0.0769625	0.0755726	0.102073
proteolysis_and_signaling_pathway_of_notch	-0.130165	-0.00506267	-0.0729229	-0.0498895	-0.0719244	0.00548241	-0.00240407	-0.0151451	0.0244845	-0.0611158	0.0297042	0.0892637	0.0179922	0.0709985	-0.0451466	-0.0113553	0.00893283	-0.165432	-0.0516367	0.0554482	0.0982772	0.0490839	-0.213897	-0.0155391	-0.00649977	-0.0529774	-0.116162	0.0947321	0.0866513	-0.0660112	0.100205	-0.16628	0.00836418	-0.0286214	-0.0263017	-0.128265	-0.0974002	0.0977905	-0.00759555	-0.00262698	0.0498528	0.00668659	-0.0544724	0.0178767	-0.034345	-0.124155	-0.144863	0.0676565	0.0306647
phosphoinositides_and_their_downstream_targets	0.0172503	-0.0612244	0.0297202	0.0904531	0.0464277	0.0243396	0.0869538	0.0578724	0.0161071	-0.000342369	0.0985917	0.0507912	0.0024881	0.0782462	-6.91e-05	0.00845933	0.103687	-0.00320182	0.038194	0.0550038	0.0188516	0.086489	-0.00170306	0.106788	0.0330459	0.0423142	0.0579588	0.0578948	0.0131868	0.0455257	0.021817	-0.00139539	0.0721024	0.0291666	0.0201444	0.0898187	0.0432835	0.0341975	0.10138	0.112276	0.0778679	0.0554951	0.0946651	0.0101875	0.0134866	-0.013792	-0.0590617	0.0024976	0.060906
Effects_of_Botulinum_toxin	0.0710377	0.111137	0.0438737	0.0854927	0.0758375	0.0856522	0.10248	0.0682676	0.101714	0.0451173	0.0690128	0.0845157	0.0441758	0.0401977	0.0796137	0.0932538	0.0775088	0.0756011	0.0858104	0.062358	0.0537332	0.130377	0.104619	0.0280212	0.0837391	0.0589941	0.0701081	0.103991	-0.00249185	0.0608612	0.0747354	0.0314886	0.0659852	0.0533191	0.000756043	0.0913921	0.158495	0.0517941	0.0409615	0.0871723	0.0495653	0.0663826	-0.0219898	0.110139	0.11565	0.102659	0.0837977	-0.00573943	0.0103258
Synthesis_and_interconversion_of_nucleotide_di-_and_triphosphates	-0.00749362	0.183239	0.0683162	0.139648	0.120685	0.11904	0.152964	0.211369	0.134229	-0.0204418	0.129597	-0.139488	-0.106639	-0.0283406	-0.0630045	0.260533	-0.136529	0.125998	-0.0164349	-0.0731634	-0.0573675	0.165097	-0.0799525	0.0251931	-0.00284176	0.0302688	0.336612	0.267926	-0.0267051	0.29352	0.205409	0.29044	0.187786	-0.0408071	-0.0125415	-0.0542635	0.213382	-0.066882	0.234692	0.0798476	-0.0659269	0.0455741	-0.0254001	-0.0401764	-0.100673	0.0910676	-0.00931079	-0.0252794	0.130679
Vitamin_B2_(riboflavin)_metabolism	0.470008	0.471909	0.464714	0.467284	0.424574	0.466718	0.467232	0.460705	0.466718	0.465947	0.460397	0.406124	0.456491	0.472886	0.453972	0.458444	0.455	0.47489	0.411006	0.46384	0.448268	0.417122	0.463892	0.448525	0.466102	0.423238	0.411572	0.405712	0.38793	0.463378	0.463481	0.463378	0.429097	0.396924	0.42072	0.466256	0.422776	0.466461	0.41409	0.465896	0.451094	0.453253	0.412908	0.467027	0.417328	0.422262	0.413884	0.415683	0.396718
Vitamin_B5_(pantothenate)_metabolism	-0.277871	-0.424232	-0.423286	-0.275713	0.289095	0.290323	-0.257745	0.285018	0.305749	0.361949	0.305651	0.283923	-0.304556	0.255305	0.266404	0.281796	-0.03681	0.290947	0.363727	0.369435	0.285068	-0.296599	0.0907688	0.255679	-0.02399	0.371261	0.375569	0.275492	0.238502	0.301697	0.295003	-0.283914	0.320019	0.279091	-0.0926878	-0.276818	0.300549	0.361887	0.289128	0.275197	-0.0535103	-0.427784	0.0523742	0.371393	0.290586	-0.267219	-0.00983632	0.16707	0.257399
Vitamin_C_(ascorbate)_metabolism	0.105813	0.179457	0.219262	0.0924489	0.178496	-0.0495621	-0.0439763	-0.0619421	-0.0478096	0.227028	-0.0580382	-0.0567533	-0.0641881	0.169486	-0.0350065	-0.0597778	-0.0626994	0.238702	-0.0544984	-0.0436152	0.156729	0.226275	-0.0537746	-0.0684962	-0.430416	-0.0923803	-0.0560308	-0.105218	-0.124213	-0.107526	0.121199	-0.0712765	-0.0360258	-0.0709793	0.101884	0.217618	0.142839	0.125171	0.212501	0.223896	-0.0730897	0.205404	0.0847572	-0.0502917	-0.0518196	-0.0177088	0.225161	-0.109624	-0.0652592
pkc-catalyzed_phosphorylation_of_inhibitory_phosphoprotein_of_myosin_phosphatase	0.0350616	-0.0150882	0.045718	-0.00938326	0.0801843	0.0201606	0.026163	0.0462791	0.00812941	-0.0249946	0.0538079	0.0748259	0.0336	-0.0145885	-0.0136238	0.0166915	0.00981906	-0.00538827	0.0315132	0.0464717	0.0855413	0.0380253	0.0350763	0.0380076	0.0275367	0.00333393	0.0937849	0.0326357	-0.00109809	0.145117	0.104975	0.025355	0.0951593	0.00690275	0.0650789	0.0518977	0.00490896	0.042438	0.0446945	-0.0145397	-0.00354421	0.0269628	0.000261685	0.0623385	-0.0153119	0.0313576	-0.0334981	-0.0368703	-0.0601442
no2-dependent_il-12_pathway_in_nk_cells	-0.256955	-0.189197	0.0687236	-0.141648	-0.218785	-0.20548	-0.2416	-0.097704	-0.0514157	-0.073165	-0.124297	-0.087353	0.208167	-0.0438061	-0.107914	-0.128746	-0.311853	0.0688764	-0.131651	0.128207	0.275007	0.0337312	-0.185769	-0.268371	-0.00691681	-0.191294	-0.27248	-0.298748	0.345912	-0.162086	-0.183829	0.0022259	-0.151797	-0.137355	0.385836	-0.133115	-0.186207	-0.163898	-0.201556	-0.0322816	-0.0467171	0.286925	0.381366	-0.101344	-0.183212	-0.306091	-0.150643	0.345704	0.162183
Digestion_of_dietary_lipid	-0.126439	0.202335	-0.115239	-0.121687	0.215334	-0.128706	-0.113106	0.36373	-0.128054	0.371617	0.366569	-0.138164	0.173705	-0.160648	-0.153123	-0.149006	-0.151	0.37459	0.371514	-0.125257	-0.196253	-0.117872	0.368195	-0.160176	0.200154	-0.136788	-0.143478	-0.177864	-0.189429	0.328585	0.200569	-0.135633	-0.138635	0.325573	-0.201193	0.376064	-0.124701	-0.1669	0.336487	0.370009	-0.170788	-0.180758	-0.206824	0.374677	-0.130843	-0.114515	0.384347	0.29002	-0.154401
Synthesis_of_IP2__IP__and_Ins_in_the_cytosol	-0.152508	-0.0675261	0.00886958	0.0135302	-0.067119	0.169692	-0.134779	0.153594	0.106445	-0.165251	-0.168703	0.0901935	-0.0878546	-0.0958666	0.141753	-0.427779	0.145836	-0.155091	0.159346	0.100992	0.0394953	-0.165741	0.130077	-0.0932816	0.0337067	-0.148334	-0.161358	-0.421708	-0.0678944	-0.427222	0.089349	-0.0763735	-0.147934	0.221419	-0.141955	0.0453754	0.065279	0.116474	-0.0836218	-0.171561	-0.188281	-0.189494	-0.146674	0.315322	0.221286	0.0278679	-0.15678	0.0416502	-0.091831
stress_induction_of_hsp_regulation	0.0799412	-0.02659	0.0437091	0.0297031	0.088476	0.101859	0.0389252	0.0269846	0.0433078	0.0634773	0.0715272	0.0934365	0.0693761	0.0878814	0.0655902	0.101625	0.0516072	0.113801	0.0556527	0.0937782	0.117914	0.126548	0.01376	-0.0103691	0.0830308	0.0459227	0.070234	0.119026	0.036237	0.104335	0.0864677	0.0355947	0.143441	0.0766347	0.0247115	0.0605348	0.0640327	0.0906479	0.0680179	0.0974134	0.0192277	0.0243258	-0.00827106	0.0772482	0.0777756	0.0784717	0.0352706	0.010794	0.0885398
Regulation_of_actin_dynamics_for_phagocytic_cup_formation	0.107558	0.128768	0.157776	0.127321	0.107936	0.11245	0.124225	0.0993088	0.109338	0.102786	0.0811124	0.0981075	0.0907717	0.080046	0.0949737	0.10515	0.079774	0.0965674	0.0992678	0.105848	0.0761592	0.104589	0.0806623	0.0989786	0.0921178	0.110228	0.0856893	0.101436	0.0648649	0.0844934	0.0917975	0.121719	0.137318	0.069471	0.05118	0.10594	0.10248	0.0983275	0.0774531	0.107923	0.0944962	0.108318	0.0560318	0.0883994	0.0920831	0.115114	0.142992	0.0454713	0.0997525
p53_signaling_pathway	-0.086139	0.00968534	-0.0654275	-0.032934	-0.0261172	0.00554032	0.00939152	0.0510523	-0.103099	-0.0175517	-0.0331216	-0.0655042	-0.0902968	0.0550831	-0.0507198	-0.11647	-0.0549538	-0.144394	0.0544287	-0.0868036	-0.0464971	-0.0572788	0.101096	0.00128997	0.0811111	-0.157265	-0.0486329	-0.0289116	0.0373122	-0.0468621	-0.0296341	-0.100909	-0.0350025	-0.108042	-0.0634465	-0.125681	0.0184854	0.0551716	-0.0354632	-0.00870434	-0.100694	-0.140143	-0.0657443	-0.068295	-0.00795358	-0.059611	0.0429404	-0.0572699	-0.0636597
ifn_alpha_signaling_pathway	0.130132	0.139944	0.0930135	0.0989737	0.0935612	0.109203	0.127029	0.225453	0.128053	0.143892	0.0689348	0.136075	0.0765992	0.0592174	0.186776	0.0796821	0.105182	0.122066	0.216701	0.116547	0.167592	0.0971843	0.205063	0.21609	0.0638735	0.11492	0.0233231	0.0833767	0.173796	0.178236	0.205297	0.0908604	0.0279691	0.189027	0.155178	0.0795092	0.149028	0.162579	0.124542	0.169054	0.181968	0.165387	0.160451	0.102887	0.108495	0.11771	0.0368399	0.141107	0.075096
phospholipase_c_signaling_pathway	0.025028	-0.161393	-0.140937	-0.0894278	0.0405027	0.0425194	-0.161097	-0.0106446	-0.0979814	0.0531127	0.0284949	-0.056485	0.00671041	0.0337482	0.00116397	-0.0949234	-0.0709105	0.0862064	-0.0762518	0.103903	0.0128542	0.0826716	0.0605408	-0.121091	-0.0334519	0.0935095	-0.00587158	0.0311991	-0.00150802	0.127444	-0.0504426	-0.00123117	0.114462	0.059966	-0.00670921	-0.053458	-0.0153298	0.152505	-0.0915394	0.113084	-0.0856902	-0.139008	-0.139197	0.181264	-0.0517167	-0.0716021	0.0210963	-0.0477039	-0.115304
GABA_B_receptor_activation	-0.00650554	-0.0229475	-0.284308	-0.295842	-0.292726	-0.00855618	-0.292588	-0.0206271	-0.00924091	-0.0175629	-0.113754	-0.00432102	-0.321918	-0.306493	-0.127581	-0.317132	-0.0235388	-0.0059187	-0.302278	-0.00832708	-0.170616	-0.00396005	-0.0192385	-0.322247	-0.304037	-0.286158	-0.0173314	-0.135872	-0.334732	-0.0499687	-0.0180024	-0.0139858	-0.283907	-0.134006	-0.0553375	-0.119839	0.00415324	-0.0394884	-0.0406354	-0.309844	-0.0350756	-0.037393	-0.0608491	-0.313869	0.00432885	-0.0840885	-0.272827	-0.0679377	-0.0125611
GABA_A_receptor_activation	-0.0213326	0.00175288	-0.00960778	-0.00996859	0.0127207	0.0214091	0.0520787	0.0154784	-0.0203037	0.0782413	0.0849513	0.0630241	-0.0476326	0.191545	0.0631456	0.099929	-0.04636	-0.0361507	-0.0192376	0.196259	0.0492855	0.131923	0.0985673	0.00275599	0.0692885	0.00262649	0.0514731	0.0767305	0.0447337	0.117943	0.00238414	0.0365035	0.032733	0.16023	-0.106537	0.0216338	0.0411091	0.0481722	-0.0256984	0.107997	-0.0286991	0.0126849	0.112758	0.0289657	0.0347229	0.0937356	0.173251	-0.0138056	-0.04946
Activation_of_Ca-permeable_Kainate_Receptor	-0.110048	-0.154642	-0.209532	-0.124967	-0.0391015	-0.133142	-0.233992	-0.242565	-0.124377	0.00720406	-0.246367	-0.226011	-0.224715	-0.142049	-0.0942643	-0.276116	-0.266729	-0.0968411	-0.234642	-0.0659875	0.040359	-0.0603913	-0.236857	0.0251959	-0.0588139	-0.252305	-0.10102	-0.149613	-0.0781406	-0.120889	-0.126497	-0.142281	-0.107853	-0.233132	-0.265749	-0.259085	-0.273734	-0.000423196	-0.0863795	-0.0405109	-0.0223541	-0.0559189	-0.146205	-0.0427404	-0.238341	-0.140965	-0.179008	-0.0627264	-0.274239
Presynaptic_function_of_Kainate_receptors	-0.0851365	-0.0489111	0.068912	-0.00115887	-0.0992332	-0.0838321	-0.00451811	-0.0560386	-0.00231024	-0.0487082	-0.0714647	-0.102239	-0.0171887	0.00268564	-0.0906808	-0.0484236	-0.0202904	-0.109691	-0.123055	-0.0887775	-0.0530247	-0.013719	-0.123367	-0.131024	0.103766	-0.0778358	0.0348938	-0.0184586	-0.0248375	0.0105706	-0.0792007	0.0267822	-0.0454036	-0.0430681	-0.00895023	-0.075607	-0.0233814	-0.161014	-0.0495359	-0.105777	-0.0620239	-0.0150211	-0.0461274	-0.120522	-0.0645645	-0.000349667	-0.0883564	-0.103586	-0.0512727
Activation_of_Na-permeable_Kainate_Receptors	-0.0369409	-0.193051	-0.189493	-0.0273997	0.304619	-0.0392244	-0.192562	-0.225834	0.0593983	-0.057407	-0.220901	-0.236662	-0.244333	-0.0226349	0.0363254	-0.23646	-0.22411	-0.0518438	-0.231717	-0.0372595	0.391861	0.0644862	-0.218136	0.328492	-0.0524949	-0.247838	-0.228565	0.00945846	0.242325	0.0455368	-0.0553134	-0.217774	-0.0374993	-0.237407	-0.26861	-0.220594	-0.236795	0.0477067	-0.0738389	-0.0585485	-0.0897752	-0.0992631	-0.0200689	0.0580708	-0.230351	-0.216939	-0.239864	-0.0294484	-0.24842
Activation_of_CaMK_IV	-0.288376	0.0636585	-0.281438	-0.287963	-0.279323	-0.292423	-0.285169	-0.308204	-0.292147	0.0283023	-0.299119	-0.297235	-0.297636	0.0151858	0.0208815	-0.308347	-0.309001	-0.310113	-0.291912	-0.291623	-0.325045	-0.302129	-0.304809	0.0236392	-0.299492	-0.298946	-0.305967	-0.326262	-0.334438	0.0114585	-0.302279	0.0339357	-0.293497	-0.239985	-0.223317	-0.296941	-0.298939	0.0334289	0.0338095	0.0255075	0.00935715	-0.0183486	-0.168923	-0.308993	-0.294985	-0.291773	0.0532923	-0.0720254	-0.311585
regulation_of_map_kinase_pathways_through_dual_specificity_phosphatases	-0.204362	-0.22833	0.0353636	-0.201784	-0.136899	-0.174524	-0.066564	0.0486718	-0.114282	-0.208984	-0.0225123	-0.0179512	-0.0910367	-0.266239	-0.00125943	0.065201	0.151128	0.199482	8.63e-05	-0.0765028	0.089561	-0.141393	-0.0338548	0.20862	-0.0929214	0.116426	0.00366427	0.215041	-0.0538923	0.094341	-0.121603	-0.22852	0.140783	0.107368	0.323393	-0.00706635	0.12784	-0.133282	-0.231753	0.0294155	-0.0295078	-0.0465851	0.1684	-0.015391	0.0351628	-0.0498252	-0.0338421	0.0537107	0.0445689
SHC_activation	0.293732	0.266007	0.203264	0.172729	0.16986	0.201692	0.18139	0.149004	0.175572	0.159673	0.161762	0.164377	0.128806	0.257178	0.147213	0.14711	0.144985	0.20477	0.16238	0.156355	0.121677	0.170889	0.170737	0.137159	0.155099	0.160801	0.181353	0.177447	0.206661	0.0398403	0.150222	0.143142	0.223241	0.127886	0.120388	0.204862	0.176505	0.207208	0.256313	0.156696	0.1293	0.119544	0.111721	0.159077	0.166541	0.18965	0.196404	0.0302858	0.149105
SHC-mediated_signalling	0.117376	0.0969449	-0.0215898	-0.00826917	0.182255	-0.0450382	0.0148935	0.0631072	-0.0317177	-0.0373478	-0.0313737	0.00852152	-0.0459709	0.0928249	0.0941598	0.0566082	-0.0453624	0.00833564	0.108769	-0.034822	0.160339	-0.0361178	0.193114	0.0824801	0.084998	0.0894212	0.17927	0.134826	0.0538791	0.0812887	-0.0385707	-0.0088286	0.0710671	0.0477899	0.0587609	0.0554064	0.0972848	0.156357	0.0689052	0.0932424	-0.0653104	-0.0139201	-0.0420983	0.111698	-0.0298577	-0.0028546	0.0938214	0.0412917	0.0405177
IRS_activation	0.282694	0.280133	0.12519	0.29036	0.249982	0.316551	0.295324	0.271685	0.290863	0.280385	0.277268	0.280197	0.258381	0.217889	0.266496	0.273409	0.0783587	0.310209	0.281653	0.287643	0.265235	0.283838	0.276686	0.259857	0.0928147	0.278654	0.294268	0.282978	0.218004	0.188344	0.280158	0.259754	0.319403	0.258876	0.234854	0.306983	0.289552	0.311583	0.26672	0.28146	0.255705	0.222458	0.238876	0.28743	0.287334	0.295287	0.312801	0.174134	0.257476
PI3K_Cascade	0.0850944	0.102104	0.00318043	0.0506845	0.0697059	0.0242089	-0.00505651	0.0671359	0.0035255	0.169259	0.0440152	0.0736823	-0.00372017	0.0914272	0.0252267	0.0716387	0.0790904	0.151538	0.0716464	0.155237	0.0492343	0.0999632	0.0903794	0.100753	0.0623429	0.00411303	0.0245094	0.127396	0.102854	0.0438993	0.101626	-0.00844558	0.0833495	0.137319	0.016946	0.0100321	0.0747659	0.151182	0.0663622	0.156314	0.124435	0.0201999	0.0703941	0.0684151	0.116223	0.0734194	0.0136182	0.0927138	-0.0311337
PDE3B_signalling	0.144377	0.0609041	0.0491501	0.311003	0.37881	0.135924	0.317774	0.368862	0.139503	0.147337	0.370738	0.37065	0.247855	0.10658	0.360845	0.113678	0.385333	0.14491	0.376339	0.375323	0.0718956	0.0832716	0.291673	0.10349	0.12691	0.332798	0.367366	0.316657	0.0781605	0.0913362	0.265962	0.295722	0.360691	0.0991315	0.354873	0.13692	0.315861	0.293422	0.289188	0.121204	0.117616	-0.283702	0.0445895	0.272804	0.165669	-0.218903	0.308012	0.317685	0.11066
mTOR_signalling	0.00555963	-0.140497	-0.069039	0.147053	0.154987	0.316738	0.266075	0.194015	-0.0286118	0.0073769	0.205231	0.178063	0.179945	0.0443024	0.133815	0.277925	-0.0350144	-0.148086	0.0744486	0.221871	0.0221721	0.152535	0.0653042	-0.0222449	0.174545	0.0341226	0.202753	0.256763	0.136929	0.21827	-0.0214235	0.0758328	0.263486	0.0259817	-0.211537	0.212172	0.261175	0.0717517	0.19664	0.0696327	0.0389	-0.0305304	-0.147606	-0.0648909	0.220231	0.0928345	0.028692	-0.164179	0.15097
Inhibition_of_TSC_complex_formation_by_PKB	0.149828	-0.0916937	-0.0969324	0.0606652	0.0973613	-0.0579447	0.0782391	0.257553	-0.0527093	0.10259	0.0889758	0.0946448	0.182458	-0.0950913	0.251158	-0.0787825	0.0916226	0.189562	0.0957983	0.097205	-0.114999	0.0511669	0.214385	-0.0954954	-0.0680133	0.0860952	0.0826231	0.0793657	-0.135555	-0.0895589	0.0197473	0.0382053	0.12927	-0.0853821	0.0433952	-0.0513871	0.0666343	0.0409073	0.231654	0.0890247	-0.0944589	-0.171723	-0.161391	0.213407	0.163191	-0.0970469	0.243926	0.18715	-0.0827104
Cross-presentation_of_particulate_exogenous_antigens_(phagosomes)	0.00495396	0.0194936	-0.00948903	-0.0688893	-0.0668995	-0.0720911	-0.0640917	-0.0745357	-0.0343116	-0.00142697	-0.0217851	-0.0710205	-0.0215155	-0.0319813	-0.0800864	0.0267971	0.039366	-0.00691607	-0.0702735	-0.00764885	0.0399029	0.0569926	-0.0753586	-0.0777318	-0.0388294	-0.0157744	-0.018096	0.0952473	-0.0446078	-0.00622747	-0.0758935	0.0759222	-0.0541161	-0.02478	0.0886663	-0.0730319	-0.0113353	-0.0223374	-0.00190632	0.0582322	-0.0054889	0.232103	0.173402	-0.0161181	-0.0720694	0.00897687	0.110718	0.271672	-0.00596821
Antigen_processing__Ubiquitination___Proteasome_degradation	0.0924697	0.0848291	0.0761285	0.0761761	0.0972185	0.111464	0.110786	0.0825274	0.109546	0.0655303	0.103748	0.0763757	0.125406	0.0907743	0.120406	0.105806	0.0715674	0.0918758	0.100294	0.0800554	0.0652684	0.0808119	0.0864649	0.0621538	0.116122	0.12332	0.152147	0.113654	0.0907918	0.111977	0.105587	0.126685	0.0816581	0.0628887	0.0250887	0.0918743	0.102165	0.078987	0.0831021	0.0420873	0.0733306	0.0828807	0.0267773	0.117927	0.0849113	0.0698654	0.155135	-0.0162718	0.0583414
Antigen_Presentation__Folding__assembly_and_peptide_loading_of_class_I_MHC	0.179355	0.159029	0.196519	0.120738	0.249515	0.19409	0.20548	0.225189	0.259832	0.121064	0.181425	0.174385	0.246783	0.19275	0.212823	0.204566	0.181462	0.117874	0.247294	0.209049	0.191899	0.129193	0.15838	0.160896	0.208973	0.24407	0.234988	0.137332	0.208854	0.0966918	0.164356	0.193619	0.241773	0.150969	0.144955	0.221114	0.146417	0.149195	0.15679	0.163132	0.165028	0.151739	0.159765	0.1778	0.243494	0.190117	0.258588	0.126327	0.219298
Cross-presentation_of_soluble_exogenous_antigens_(endosomes)	0.115396	0.214128	0.284444	0.193638	0.20665	0.189639	0.247826	0.139679	0.218826	0.060847	0.153024	0.116258	0.235082	0.220886	0.167827	0.232663	0.137073	0.0695153	0.150695	0.141295	0.107833	0.172943	0.117707	0.132942	0.262047	0.233953	0.240226	0.178043	0.160172	0.183665	0.112199	0.196202	0.125746	0.0907409	0.0725315	0.154527	0.16444	0.0635463	0.125925	0.0669075	0.160788	0.201707	0.153811	0.134311	0.10381	0.195259	0.230547	0.0935024	0.187385
MHC_class_II_antigen_presentation	-0.0139707	0.0301695	0.0533272	-0.0183451	-0.00546116	0.0243507	0.00871765	0.0122125	0.0222128	-0.0308979	0.00111818	-0.000888899	0.116179	0.0038073	0.0117553	0.0367986	0.0275279	0.026617	-0.00787428	0.0265378	0.0314959	0.0233494	0.00591464	0.00615317	0.0710799	0.0268276	0.0487796	-0.00182414	0.0801777	0.0084588	0.00653109	0.0355292	0.00439007	-0.0116334	0.0540452	0.0186974	-0.016839	-0.0150135	0.0367947	-0.00825824	0.0526033	0.105877	0.0206004	0.0150244	-0.0182389	-0.0211552	0.135417	0.0288962	0.101771
ER-Phagosome_pathway	0.162736	0.20435	0.265849	0.184753	0.246577	0.19555	0.273498	0.19137	0.246967	0.120025	0.163885	0.135667	0.250495	0.222164	0.194218	0.247048	0.151125	0.120535	0.211094	0.169439	0.148311	0.182437	0.130826	0.142718	0.247704	0.264963	0.241419	0.158036	0.195359	0.154091	0.135993	0.199169	0.190193	0.107222	0.116657	0.211842	0.177741	0.107424	0.166297	0.136984	0.181803	0.19408	0.131609	0.146061	0.21106	0.233364	0.242541	0.0867454	0.231513
Endosomal/Vacuolar_pathway	0.139176	0.155552	0.230271	0.137354	0.207776	0.1476	0.215584	0.20666	0.215867	0.119257	0.139082	0.147664	0.196106	0.164104	0.18266	0.191766	0.121042	0.116319	0.226576	0.153012	0.152796	0.136539	0.145937	0.112119	0.200381	0.222238	0.181497	0.113966	0.148621	0.0851138	0.146636	0.152231	0.194211	0.100232	0.116609	0.201351	0.155575	0.11865	0.133598	0.129689	0.152951	0.144873	0.107905	0.13782	0.205539	0.186866	0.227262	0.0816404	0.189605
SOS-mediated_signalling	0.201207	0.197072	-0.0330156	0.111137	0.18719	0.0889923	0.126133	0.0748262	0.0898568	0.0834001	0.0873551	0.118285	0.0792998	0.128562	0.187458	0.159367	-0.0573377	0.106776	0.118235	0.0949089	0.237323	0.0804075	0.199112	0.178269	0.0775245	0.17964	0.190665	0.249749	0.199146	0.120099	0.0861392	0.126333	0.204579	0.177905	0.134198	0.0892928	0.187823	0.208675	0.167958	0.191783	0.055274	0.0784356	0.083022	0.127361	0.0908219	0.110731	0.194624	0.160537	0.0694587
Signal_attenuation	0.164073	0.183117	0.106083	0.189858	0.163352	0.187154	0.181852	0.182134	0.163959	0.155874	0.155251	0.202438	0.150484	0.131218	0.18741	0.127458	0.0662833	0.182187	0.236201	0.183079	0.211072	0.152239	0.234326	0.144884	0.0521122	0.152376	0.18844	0.172908	0.145071	0.145255	0.155452	0.144942	0.198047	0.16403	0.200071	0.203706	0.170016	0.230952	0.148103	0.120473	0.138406	0.140244	0.139812	0.213776	0.17709	0.177675	0.209389	0.110554	0.170243
Immunoregulatory_interactions_between_a_Lymphoid_and_a_non-Lymphoid_cell	0.111641	0.165601	0.233784	0.149811	0.158065	0.151083	0.177166	0.141073	0.158979	0.104995	0.101664	0.111436	0.196925	0.141907	0.125096	0.13937	0.110234	0.099851	0.1573	0.143835	0.186353	0.116791	0.100685	0.12306	0.185846	0.148255	0.140083	0.0944091	0.178184	0.0952975	0.110215	0.152503	0.131047	0.0953255	0.142518	0.150279	0.129974	0.100065	0.124551	0.117573	0.178377	0.178322	0.160577	0.100582	0.138627	0.14549	0.163374	0.132517	0.20077
Rap1_signalling	0.014719	-0.116431	-0.00204129	0.136274	-0.0763246	0.0305002	-0.0256484	-0.00788162	0.152507	-0.0660905	-0.0487994	0.0668665	0.0618361	0.0203512	0.00163379	0.0694089	-0.0127262	-0.0613512	0.0500485	-0.00272829	-0.0338795	0.0277163	0.0078449	0.0960841	0.0663537	-0.00909933	-0.106971	0.0410015	-0.0513371	0.0785564	0.0244864	0.0556003	-0.0181549	0.0527494	0.10229	0.031813	0.0924337	-0.0187573	0.0128909	-0.117859	0.132551	0.115852	0.0387	-0.00825915	-0.0466542	0.100044	0.0437497	0.0377714	0.0754891
Signaling_events_mediated_by_TCPTP	0.0733197	0.0287997	0.00687173	0.080002	0.0107892	0.109175	0.0345648	0.0791647	0.0716227	0.0588146	0.0742287	0.087908	0.0499904	0.0612729	0.105481	0.0833706	0.0993415	0.0916999	0.0854943	0.0828603	0.119707	0.079018	0.0884928	0.081561	0.0118657	0.065302	0.0490808	0.0967134	0.0858269	0.0353993	0.0704048	0.0203482	0.133956	0.0798468	0.150661	0.0538237	0.0771806	0.113116	0.10708	0.0784056	0.0810575	0.0568331	0.115328	0.110616	0.07097	0.0262211	0.0723951	0.136465	0.0256698
Epidermal_Growth_Factor_Receptor_(EGFR)_signaling	0.0736233	-0.107199	-0.11953	-0.0963525	-0.19554	-0.0384232	-0.12068	0.0993924	-0.08293	-0.155431	-0.154116	-0.0444974	0.245594	-0.0891138	-0.0575168	-0.122585	-0.117822	-0.213716	-0.0703299	-0.0770293	0.00476004	-0.114815	-0.0507894	-0.135728	-0.1948	-0.15236	-0.157132	0.137742	0.0218117	-0.102041	-0.107878	-0.162024	-0.0282112	-0.0577303	-0.0718621	-0.112436	-0.0743532	0.0986899	-0.0484582	-0.1589	-0.110813	-0.163083	-0.141874	0.0573391	-0.104292	-0.159	-0.0271301	0.180184	-0.178781
Formation_of_the_Early_Elongation_Complex	0.139288	0.140381	0.205348	0.145678	0.129381	0.118544	0.217586	0.114768	0.123506	0.226266	0.157697	0.0713867	0.118897	0.143196	0.0644134	0.229403	0.0736803	0.239354	0.131122	0.089902	0.0619206	0.169148	0.0708431	0.112102	0.1413	0.225107	0.131679	0.102639	0.0589467	0.17405	0.152978	0.20132	0.0635413	0.0686515	-0.00985737	0.122297	0.131461	0.0834633	0.0579895	0.183827	0.127597	0.172219	-0.0414162	0.157176	0.0836253	0.147562	0.185226	-0.0697583	0.110465
Formation_of_RNA_Pol_II_elongation_complex	0.105253	0.109082	0.167335	0.146949	0.123538	0.0531813	0.191972	0.101702	0.0794021	0.175649	0.131619	0.0421607	0.113209	0.131194	0.078759	0.196982	0.0438001	0.196083	0.0793528	0.041837	0.0487539	0.126154	0.0338877	0.100463	0.134623	0.145368	0.126811	0.0947786	0.0510498	0.136798	0.129424	0.175795	0.0533048	0.0279534	-0.0271091	0.0945597	0.0934229	0.0363534	0.0361261	0.142141	0.0938691	0.134138	-0.0824126	0.121295	0.0518797	0.124117	0.160366	-0.0994129	0.0873247
Fc-epsilon_receptor_I_signaling_in_mast_cells	0.0501948	0.0264963	0.0271774	0.0541319	0.0351394	0.022452	0.0758138	0.0363966	0.0211801	0.0539418	0.0406066	0.025785	0.0364847	0.0285455	0.0427801	0.0512695	0.0407741	0.0620686	0.0254683	0.0267809	0.0304669	0.0466628	0.0354493	0.0580883	0.0687349	0.0319846	0.0340345	0.0587676	0.0387492	0.0688749	0.0161419	0.066212	0.0532511	0.0154805	0.0757774	0.0511841	0.0381167	0.0272989	0.0354918	0.080416	0.0185584	0.0521692	0.0490667	0.0437852	-0.00221224	0.0457916	0.0506437	0.0423727	0.0537244
Uncoating_of_the_Influenza_Virion	0.24878	0.253752	0.177771	0.181066	0.251303	0.247635	0.191399	0.225664	0.251309	0.231321	0.239809	0.245335	0.21462	0.207347	0.220504	0.223298	0.213894	0.232094	0.224078	0.24707	0.184403	0.171983	0.214614	0.208152	0.231532	0.240867	0.23535	0.196793	0.163171	0.20929	0.218798	0.238122	0.265919	0.224497	0.134384	0.247184	0.261748	0.229843	0.232103	0.229789	0.124947	0.184473	0.131132	0.245569	0.246501	0.267795	0.254988	0.116605	0.210528
Transport_of_Ribonucleoproteins_into_the_Host_Nucleus	0.0954759	0.105837	0.0390494	0.042042	0.0857425	0.085978	0.0726427	0.113146	0.0983513	0.170215	0.117601	0.13571	0.10372	0.0842077	0.0954169	0.0957678	0.0776921	0.152892	0.0922995	0.115727	0.0476644	0.0869028	0.121693	0.0976208	0.0983646	0.148867	0.095677	0.14328	0.0481694	0.0726299	0.154282	0.129385	0.13399	0.108458	0.0138161	0.122925	0.18694	0.149156	0.122275	0.13936	0.0336349	0.069611	-0.00205669	0.144144	0.125774	0.115524	0.144163	-0.0120088	0.0725085
vRNP_Assembly	0.17264	0.256873	0.177929	0.18381	0.176177	0.174736	0.214017	0.172289	0.177535	0.220783	0.161067	0.167083	0.177445	0.127385	0.166751	0.157724	0.160367	0.202803	0.212851	0.217948	0.108255	0.188148	0.209967	0.197835	0.158585	0.191614	0.156268	0.157319	0.0879326	0.153634	0.160239	0.185043	0.239701	0.136431	0.0655491	0.182422	0.220089	0.220029	0.196283	0.219472	0.14305	0.156296	0.0559328	0.219251	0.214599	0.232407	0.201773	0.0594756	0.180855
Influenza_Life_Cycle	0.246203	0.251332	0.183781	0.187321	0.249398	0.245114	0.197506	0.222989	0.248726	0.228627	0.237667	0.243442	0.212183	0.20448	0.217803	0.220641	0.21177	0.229379	0.222656	0.245159	0.181047	0.177268	0.213194	0.205414	0.228965	0.238196	0.23326	0.19536	0.160629	0.206426	0.217317	0.236115	0.264093	0.222258	0.130917	0.244764	0.259384	0.22786	0.228327	0.2277	0.12961	0.181928	0.126792	0.243502	0.243903	0.264923	0.252549	0.111927	0.2078
Entry_of_Influenza_Virion_into_Host_Cell_via_Endocytosis	0.233119	0.241135	0.203765	0.208303	0.245652	0.243817	0.219638	0.198398	0.245214	0.197497	0.255086	0.229973	0.245008	0.203549	0.206072	0.253305	0.211792	0.238103	0.183769	0.243533	0.185396	0.20286	0.187468	0.225009	0.238324	0.245581	0.227568	0.208623	0.163069	0.230675	0.230743	0.243846	0.263206	0.196958	0.109832	0.242165	0.266068	0.20247	0.250317	0.196422	0.142932	0.199248	0.147894	0.231196	0.202404	0.264758	0.241891	0.0923719	0.218985
Fusion_of_the_Influenza_Virion_to_the_Host_Cell_Endosome	0.262609	0.266678	0.168408	0.171433	0.264064	0.261242	0.181961	0.239775	0.264988	0.245722	0.253434	0.258483	0.229134	0.222181	0.234895	0.237488	0.227304	0.246347	0.232745	0.259797	0.20024	0.161489	0.223547	0.222535	0.245226	0.255174	0.248789	0.20577	0.177789	0.22395	0.227933	0.250742	0.27842	0.238573	0.150388	0.260648	0.275118	0.243189	0.245338	0.24331	0.114839	0.198909	0.145133	0.259423	0.260328	0.279169	0.268306	0.131845	0.224574
Viral_Messenger_RNA_Synthesis	0.159104	0.221086	0.237006	0.220022	0.175094	0.178563	0.264571	0.154656	0.183945	0.239386	0.173147	0.135361	0.15406	0.149976	0.144217	0.222102	0.143901	0.221337	0.191119	0.172636	0.115373	0.225578	0.170199	0.164528	0.178649	0.197523	0.180985	0.132861	0.0718475	0.202752	0.162453	0.197273	0.168898	0.116933	0.0387699	0.174243	0.194972	0.191972	0.158197	0.217108	0.143127	0.176576	0.025924	0.184075	0.151843	0.228201	0.219443	-0.00368612	0.176991
cRNA_Synthesis	0.203607	0.259978	0.209272	0.213917	0.202229	0.202469	0.244063	0.201912	0.206306	0.238076	0.18838	0.195508	0.195566	0.160016	0.196555	0.183287	0.189891	0.220211	0.228659	0.236581	0.13401	0.219112	0.22739	0.214862	0.186394	0.216613	0.184382	0.189125	0.114177	0.184383	0.188446	0.210266	0.247045	0.172018	0.08493	0.20874	0.24251	0.237171	0.203737	0.236715	0.172663	0.173301	0.0761119	0.237157	0.224685	0.253016	0.232241	0.0812591	0.198364
S1P5_pathway	0.0333478	0.0973257	0.186485	0.10855	0.0306609	0.203333	0.226174	0.0680286	0.206515	0.000184238	-0.0206508	0.0317971	-0.0264481	0.11566	-0.0336029	0.0635495	0.0126029	0.144267	0.0380098	0.0696439	0.0453337	0.184462	0.113682	0.0917697	0.262584	0.0650859	0.0582687	0.150882	0.198471	0.150146	0.290763	0.0988312	-0.00968875	0.129892	0.178488	0.137677	0.0451497	0.0893928	0.0964823	0.08891	0.282883	0.25413	0.0516512	0.0339171	0.0256375	0.146716	0.0928154	0.0516744	0.22827
Neurotransmitter_Clearance_In_The_Synaptic_Cleft	-0.295612	0.379672	0.473699	-0.262321	-0.292799	-0.265714	-0.255006	-0.319295	-0.2988	-0.308615	-0.278715	-0.279091	-0.32154	-0.323548	-0.319973	0.46602	-0.309904	-0.400445	-0.299383	-0.292155	-0.286894	-0.297582	-0.308244	-0.26559	-0.304812	0.463798	-0.307126	0.47166	-0.33695	0.358818	-0.309792	0.458982	-0.233343	0.462942	-0.307756	-0.302209	-0.27193	-0.307781	0.45824	-0.309246	-0.330803	-0.33306	0.432073	-0.312872	-0.268761	-0.256986	-0.301853	0.407262	-0.31397
Dopamine_clearance_from_the_synaptic_cleft	-0.355654	-0.33895	-0.34558	-0.35663	0.114662	-0.360228	-0.358532	-0.379758	-0.358892	-0.362181	-0.453356	0.104229	0.0639868	0.0630617	-0.381043	-0.447137	0.454435	-0.323223	-0.36069	-0.351285	0.0331498	-0.35221	-0.368605	-0.376674	-0.296806	-0.438297	-0.3021	-0.316388	-0.375132	-0.362541	-0.451762	-0.291872	-0.328723	-0.336329	-0.386388	-0.29511	-0.30061	-0.357196	0.463172	-0.362746	0.0490823	-0.441895	-0.381557	-0.375389	0.110705	-0.35478	-0.367372	0.414912	-0.373385
calcium_signaling_by_hbx_of_hepatitis_b_virus	0.128268	0.0864024	0.0761712	0.0238127	0.0577842	0.132969	0.0686093	0.111123	0.118958	0.0363401	0.0327305	0.120997	0.0876336	0.0505208	0.0645117	0.0193108	0.0841116	0.0417714	0.111127	0.123854	0.12169	0.0868306	0.140311	0.0774934	0.14177	0.0457864	0.0854033	0.0227258	0.0390682	0.101769	0.102743	0.0284034	0.0762475	0.037613	0.109763	0.111178	0.0469652	0.119534	0.128952	0.0108868	0.0983275	0.107653	0.0979519	0.0891849	0.036305	0.0987302	0.0738587	0.102449	0.0269312
FoxO_family_signaling	-0.0694726	-0.0940257	-0.12514	-0.0267614	-0.117627	-0.0592426	-0.0604818	0.0324019	-0.00386874	-0.025641	-0.0331705	-0.0178306	0.000743877	-0.1096	0.0470683	-0.0706241	-0.116573	0.0409887	-0.0172731	-0.0363611	-0.00908897	-0.123559	0.00068479	-0.000305388	-0.0315233	-0.0485812	-0.0380906	-0.0320417	-0.0327661	-0.0442419	0.00175918	0.0135389	-0.0357868	-0.0237867	0.018523	-0.0579555	0.0586313	-0.00262887	-0.080431	-0.122403	-0.0848345	-0.116455	-0.0906146	-0.0408702	-0.0293844	-0.151977	-0.0363777	-0.09665	-0.067742
sonic_hedgehog_receptor_ptc1_regulates_cell_cycle	0.0769103	0.0114176	0.0423152	0.0640027	0.023153	0.00950029	0.127485	-0.00413085	0.0572312	0.155322	-0.0083303	-0.0342381	0.0221242	0.0806275	-0.0111002	0.0036153	0.0198956	0.123208	0.0584631	-0.0255858	-0.0335026	0.0426969	0.161437	0.00560837	0.0539079	0.121984	0.0574263	0.0323684	-0.052169	-0.0142635	0.0368222	0.122284	-0.050646	0.00190787	0.0143249	0.0179454	0.038723	0.0514482	0.0539483	-0.021038	-0.0131531	0.100114	-0.0518062	0.0410138	0.0169494	0.0112346	0.0334739	-0.107404	0.0601839
Nuclear_Receptor_transcription_pathway	0.249873	0.169319	0.14105	0.237035	0.280087	0.234792	0.275822	0.265159	0.196816	0.194171	0.259922	0.231443	0.212225	0.246688	0.218949	0.265876	0.245407	0.155541	0.24449	0.190237	0.249442	0.14877	0.241996	0.239908	0.211473	0.228892	0.163336	0.211529	0.233592	0.232287	0.277939	0.147202	0.214932	0.238069	0.23826	0.233296	0.128167	0.244305	0.185839	0.219141	0.137366	0.15974	0.236089	0.20279	0.278289	0.126124	0.265855	0.182401	0.194408
YAP1-_and_WWTR1_(TAZ)-stimulated_gene_expression	0.00423914	-0.0680834	-0.09971	-0.063054	-0.0895067	-0.0528643	-0.110552	0.0641958	0.00906376	0.0403212	0.00920792	0.0396762	0.030566	-0.0837313	0.0393593	-0.0691934	-0.0653448	0.0712059	0.0440707	-0.0440506	-0.00676625	-0.0915788	0.063194	0.027426	-0.0586683	0.0226054	-0.0135685	0.0562869	-0.030586	0.0120012	0.120011	0.015445	0.107238	0.0297149	0.0473815	-0.0292311	0.0677461	-0.0020148	-0.0186997	0.0280762	-0.0101756	-0.034473	-0.0415708	0.0258718	0.109951	-0.0189218	0.0364509	-0.0719878	-0.00253184
thrombin_signaling_and_protease-activated_receptors	0.00357114	-0.0667017	-0.102007	-0.0472019	0.025129	0.00226705	-0.055837	0.0313292	-0.0651225	-0.0109963	0.000272533	0.0262798	-0.0211969	-0.0618983	-0.0253649	-0.0569208	-0.0496964	-0.00446851	0.0251478	0.0131193	0.0494814	-0.0474368	0.0132158	-0.00241792	-0.0752217	-0.0237101	-0.043884	0.00932309	0.0373699	0.0457208	0.018362	-0.0474372	0.0298653	0.0207499	0.0454683	-0.0248467	-0.0146231	0.0546497	-0.00820063	0.00495967	-0.0687486	-0.0578284	-0.0218643	-0.0114251	-0.00390103	-0.0857448	-0.0229976	-0.00137158	-0.0713017
Nonsense_Mediated_Decay_Independent_of_the_Exon_Junction_Complex	0.211393	0.295363	0.301608	0.254838	0.176442	0.0339818	0.295914	0.0249732	0.0370605	0.253879	-0.00460754	-0.216024	0.00347207	-0.00199281	-0.0988661	0.131594	-0.13506	0.313631	-0.157278	-0.199914	-0.159937	0.307674	-0.208073	0.128387	0.047839	0.134372	0.14911	-0.137191	-0.0729338	0.0235212	0.0795302	0.322127	-0.00870197	-0.0499351	-0.125735	0.171721	0.333679	-0.206916	-0.00591475	0.243287	0.0138192	0.297442	-0.227532	0.0254097	-0.0505161	0.371276	-0.0490076	-0.258255	0.284287
snRNP_Assembly	0.0379874	0.128996	0.0442202	0.0332374	0.0560054	-0.023242	0.0729896	0.0390083	-0.0199022	0.189431	0.0497559	0.00125495	0.027629	0.0694806	0.0154616	0.100688	-0.0348135	0.148376	0.0151082	-0.0242097	-0.0291396	0.0776274	0.0319636	0.0137098	0.0678971	0.0785068	0.109279	0.110272	-0.0225549	0.0215202	0.0674332	0.147733	0.0232195	0.0310923	-0.0839076	0.0596491	0.210372	0.0657161	0.041082	0.133508	-0.00743255	0.0978258	-0.0975006	0.0761012	0.0547627	0.106311	0.101213	-0.0991092	0.0394352
Generic_Transcription_Pathway	-0.0777078	-0.125845	-0.13471	-0.109812	-0.0510421	-0.143477	-0.170516	-0.0899905	-0.18264	0.0248575	-0.0301455	-0.0322121	-0.0663683	0.0564374	-0.0350703	-0.167815	-0.161139	-0.0236796	-0.00527217	-0.165765	-0.135126	-0.172873	-0.0473236	-0.136166	-0.136513	0.00903633	-0.0640131	-0.0797262	-0.102679	-0.101686	-9.39e-05	-0.0162856	-0.0831627	-0.00393353	-0.222635	-0.10826	0.0329742	0.00396674	-0.0950531	0.00329638	-0.0977611	-0.0925237	-0.26078	-0.0618981	-0.000136404	-0.0737605	-0.0192863	-0.153776	-0.0503519
Notch-HLH_transcription_pathway	-0.0346949	0.000617754	-0.13639	0.0500271	-0.1159	-0.0346657	0.0256896	-0.0407284	-0.0351765	-0.0186559	0.0661018	0.047461	0.0442636	-0.00089827	0.0681779	-0.00658248	-0.036541	0.0575603	-0.0454051	0.0450492	0.0194304	0.020234	-0.106488	-0.0126921	0.0145971	0.0394793	-0.0615538	-0.0500432	0.0241146	-0.143679	0.0695078	-0.11041	0.00934491	0.0811995	-0.0385057	0.0507048	-0.113495	0.0834529	0.00972906	0.0182611	0.0159173	-0.00872053	-0.0861373	0.0539638	0.00404606	-0.00562313	-0.0604932	0.00276681	0.0415489
betaKlotho-mediated_ligand_binding	0.481624	0.483615	0.138197	0.480092	0.473594	0.133153	0.140357	0.121176	0.131884	0.479406	0.430533	0.477789	0.476515	0.472802	0.121267	0.474344	0.471861	0.466623	0.128784	0.478527	0.444144	0.480635	0.123068	0.467576	0.129258	0.113535	0.126104	0.470775	0.467239	0.480357	0.429278	0.483556	0.471103	0.477349	0.0789132	0.130521	0.463553	0.479735	0.466802	0.123311	0.470462	0.41662	0.444291	0.128774	0.481498	0.482295	0.132116	0.446225	0.421299
FGFR1c_and_Klotho_ligand_binding_and_activation	-0.165578	0.183444	0.200375	0.127196	-0.187683	-0.125332	-0.138839	0.183765	-0.124857	0.107715	0.186302	0.189171	-0.199447	0.0874853	0.176622	-0.175781	0.178048	0.189474	0.113052	0.197643	0.0151046	-0.159827	0.187484	-0.192275	-0.17077	-0.19811	-0.204125	0.0913384	0.200376	-0.194606	0.188129	-0.192735	0.206534	0.0899447	0.12431	-0.170086	0.130408	0.189462	-0.167206	0.105891	0.122695	-0.235387	-0.201138	-0.173185	0.19666	-0.152241	-0.163428	0.0830584	-0.192123
FGFR2c_ligand_binding_and_activation	0.0314607	0.0911632	-0.0776222	-0.0968259	0.0479076	-0.0754798	-0.00800359	-0.0283968	-0.00747709	0.230922	-0.143034	-0.138205	-0.162538	0.0459	-0.139828	0.0728771	0.0266156	0.0331277	-0.0313761	0.16077	-0.0987531	0.174385	0.0317221	0.145351	-0.00852772	-0.0963565	-0.0479714	-0.0862925	0.0175071	-0.101867	-0.0739097	-0.148531	-0.12114	0.0349776	-0.0849363	-0.0606283	-0.12187	0.0607891	0.070748	0.20966	0.162073	-0.00319627	0.0836763	0.00528396	-0.0312593	0.0814022	-0.0791261	0.00474048	-0.141653
FGFR2b_ligand_binding_and_activation	0.195998	0.200972	-0.0204271	-0.0276783	0.273184	-0.0386847	-0.0141938	-0.0600035	0.00896694	0.270711	-0.0338125	-0.0470232	-0.0304157	0.178876	-0.038691	0.261664	0.321742	0.273413	-0.0443229	0.300859	-0.105205	0.26838	0.243834	0.177515	-0.0343791	-0.0329176	-0.0375476	-0.0517876	0.119946	-0.0292522	-0.0567766	-0.0499388	-0.0352294	0.188639	-0.134917	-0.0143742	-0.00811949	0.199542	0.216654	0.269219	0.241122	0.245701	0.245293	-0.0518842	-0.0402082	0.288537	0.0202349	0.164857	-0.069591
FGFR4_ligand_binding_and_activation	0.120831	0.17009	0.0590192	0.169473	0.1971	0.00814419	0.152765	0.146065	0.163784	0.247503	0.0917887	0.13694	0.118082	0.134051	0.025789	0.180691	0.106505	0.13141	0.136198	0.178424	0.178563	0.154409	-0.0118294	0.179678	0.201003	0.0365744	0.120879	0.189215	0.130531	0.183429	0.133797	0.112237	0.144135	0.163872	0.147457	0.0504678	0.121328	0.168645	0.18123	0.128104	0.211996	0.0591977	0.120657	0.120803	0.223063	0.166457	0.0550613	0.129481	0.0932249
FGFR3b_ligand_binding_and_activation	-0.0884711	0.0509955	0.0060366	-0.0245401	-0.0113128	-0.140185	-0.0949188	-0.0142377	-0.0991352	0.12733	-0.0908373	-0.0878501	-0.105713	-0.0206075	-0.10592	0.0545594	-0.105765	-0.0901282	-0.0106109	-0.0721303	0.00306424	-0.0857478	-0.100968	-0.0548484	0.293361	-0.100848	-0.0357527	0.189014	-0.0413489	0.0453706	-0.100999	-0.0974823	-0.0804523	-0.0198493	-0.0653952	-0.0922802	-0.0800522	-0.00721348	-0.0213003	-0.00876769	0.092814	-0.124979	-0.0429554	0.0012765	-0.00649124	-0.0476784	-0.0724349	0.00689554	-0.0736681
FGFR3c_ligand_binding_and_activation	-0.0437211	0.0467548	0.0223668	0.00109263	0.00249771	-0.0633925	-0.0246534	0.080936	-0.0114017	0.176594	-0.0482891	-0.0453002	-0.0670085	-0.00765561	-0.0403287	0.103349	-0.0745842	-0.0297907	0.0709739	-0.0854914	0.0403655	0.00181642	-0.0778148	0.0261075	0.175484	0.0116443	0.0535981	0.120325	-0.0054011	0.0350302	0.0215547	-0.0623028	-0.0449178	-0.0108081	-0.0480816	0.0290226	-0.0471904	0.00499442	0.0100301	0.0644588	0.12947	-0.0829836	-0.0256369	0.188373	0.0748206	-0.012486	-0.088268	0.0435186	-0.0436878
Glypican_1_network	-0.0827465	-0.031534	-0.0471906	-0.0938931	-0.0125815	-0.047174	-0.0623375	-0.0136721	-0.0432828	-0.0409234	-0.0970569	0.0141015	-0.0127322	-0.0412165	-0.0896411	-0.0454224	-0.116054	-0.0969496	-0.0299809	-0.0270177	0.0110359	-0.026602	-0.0391397	0.0570093	-0.124753	0.00670785	-0.0726875	-0.0388049	0.0424758	0.0783373	-0.0263872	-0.106361	-0.0885521	-0.0188718	0.0876886	-0.0596953	-0.0610379	-0.0639897	-0.0143963	-0.0327224	0.074977	0.00123302	0.125309	-0.0759605	-0.0730186	-0.0805005	0.0446938	0.122887	0.0324768
cyclins_and_cell_cycle_regulation	-0.00994637	0.0238223	-0.0467354	-0.0325407	-0.0111095	-0.0196621	-0.0307935	-0.0557875	-0.108066	0.00457091	-0.0382506	-0.10795	-0.0852406	0.0710645	-0.0593785	-0.0789219	-0.0478779	0.00324127	-0.0506553	-0.0889626	-0.0543379	-0.066778	-0.0304946	0.0227179	0.0736495	-0.00271018	-0.0141197	-0.000732949	-0.0564399	-0.0390504	-0.0503885	0.00897072	-0.0527776	-0.0646873	-0.0718959	-0.0824738	-0.0249036	-0.0392799	0.0102551	-0.00870332	-0.0718028	-0.0629989	-0.0479178	-0.10111	-0.0684292	0.0319862	0.0158886	-0.111912	-0.0603853
trefoil_factors_initiate_mucosal_healing	0.111196	0.05572	0.00549724	0.0250552	0.0417324	0.0572787	-0.0118924	-0.020258	-0.0107372	0.0242984	-0.0117981	0.0450759	-0.0107897	0.0664539	0.0406985	0.0193051	0.0713603	0.0136354	-0.0173151	0.074273	0.0773149	0.066452	0.00273795	0.00632166	0.0498854	0.00463347	0.0251494	0.115387	0.0656387	0.0566835	0.0209667	-0.0419068	0.0671766	0.0268536	0.0536463	-0.00536916	-0.00655373	0.0469863	0.0801822	0.00816442	0.0193748	-0.025251	0.0545001	0.060989	-0.0148837	0.00321635	0.00888611	0.00942474	-0.0340286
g-protein_signaling_through_tubby_proteins	0.0740983	0.000184792	-0.12205	-0.127789	-0.13654	0.259617	-0.118063	-0.154922	-0.135404	-0.154023	-0.148898	-0.144615	-0.16919	-0.169622	0.00901646	-0.156961	-0.160623	0.0179105	0.0293873	-0.135368	-0.0331617	-0.0060947	-0.152219	-0.00122123	-0.149125	0.0258768	-0.15214	-0.160648	-0.0416075	-0.177843	-0.150836	-0.143397	-0.11946	-0.159513	-0.213813	-0.138474	-0.130507	-0.14771	0.0655817	-0.154776	-0.179571	-0.189773	-0.219237	0.0243818	0.0344397	-0.121316	-0.114477	-0.237047	-0.161602
g-secretase_mediated_erbb4_signaling_pathway	0.0372312	0.0813343	-0.0252867	0.0442851	0.165744	0.111748	-0.0075426	0.0225892	0.0198794	0.105519	0.0934352	0.0738316	0.0450909	0.037195	0.0570445	0.129773	0.274999	0.0708224	0.0371062	0.219054	0.198576	0.142188	0.0238718	-0.00744256	0.0180613	0.0196707	0.12309	0.143588	0.0992061	0.123062	0.0487321	0.0328924	-0.0071901	0.100324	0.0886917	-0.025781	0.0542545	0.148129	0.150292	-0.00321551	0.0728402	0.0295145	0.0579589	0.0068209	0.0151934	0.0494478	0.107441	0.0433698	-0.0483712
Stabilization_of_p53	0.041982	-0.450758	0.0964215	0.0173821	0.0844033	0.0715106	-0.447665	0.00296636	0.0770713	0.0522986	0.0654769	0.0995595	0.012934	0.0836237	-0.455639	-0.405139	0.0431619	-0.266451	0.045882	0.23837	0.160725	0.0321826	0.251919	0.0410276	0.0958677	-0.38362	0.0851213	0.0631368	0.0249881	0.102668	0.0094411	-0.42444	-0.421843	0.344881	0.289562	-0.480876	0.0677716	0.22537	0.0210452	0.249773	0.0593314	-0.303668	0.00941173	-0.00783041	0.298442	-0.443898	0.00658807	0.293469	-0.372301
Autodegradation_of_the_E3_ubiquitin_ligase_COP1	0.18046	0.247325	0.286114	0.234714	0.253238	0.207742	0.316853	0.174958	0.234389	0.130283	0.195909	0.123729	0.261946	0.260487	0.205201	0.277138	0.16886	0.15716	0.183381	0.150259	0.130827	0.258349	0.150579	0.160796	0.278896	0.290616	0.279303	0.190437	0.197621	0.228519	0.145962	0.211994	0.140859	0.130556	0.114195	0.200868	0.231437	0.114791	0.181926	0.179707	0.196735	0.224914	0.115802	0.188277	0.176683	0.246054	0.255061	0.06174	0.237719
p53-Dependent_G1_DNA_Damage_Response	0.178426	0.111365	-0.0175722	-0.062248	-0.033386	0.0506337	0.0548451	0.0161041	-0.0706502	-0.247163	0.0317264	-0.0193948	-0.0478619	0.114691	0.0104012	-0.242916	0.0324792	-0.0100788	-0.103764	0.0478906	0.00647128	0.0374854	0.175739	0.0270583	0.375028	-0.17211	-0.130083	0.11588	0.238779	-0.00182715	0.117587	-0.0801732	-0.0113803	0.0328292	-0.00852848	-0.0704356	0.00801568	0.164013	0.188313	0.0477177	0.0180952	0.000454271	-0.0201032	-0.244918	0.018007	-0.217738	-0.0119411	-0.0424258	-0.0950414
Regulation_of_RAC1_activity	0.0286109	-0.071329	-0.0421399	-0.0458467	-0.0221543	0.00442751	-0.0490623	0.0812196	0.0212287	-0.0218449	-0.00856681	-0.0264637	0.00429993	-0.079094	-0.0191376	-0.0964984	-0.0350697	-0.0463881	0.104335	0.0140989	0.0476559	-0.0657841	0.104517	-0.0544486	-0.0289123	-0.00977137	-0.034737	0.00973029	0.0684475	0.0097632	-0.0036312	-0.0844486	-0.011723	0.0101266	0.0824576	-0.0123602	-0.0718422	0.0206497	-0.0102597	-0.0209885	-0.078033	-0.00532798	-0.0227318	-0.0072362	-0.0341836	-0.0908451	-0.0268664	0.0427017	-0.0332974
Transcriptional__activation_of__cell_cycle_inhibitor_p21	0.262876	0.256151	0.281676	-0.445816	0.282741	0.301175	0.25078	-0.457383	-0.452781	-0.295219	0.270011	0.307318	0.239431	0.285495	-0.437993	-0.4498	0.30056	-0.200773	-0.444461	0.268714	0.286525	0.469625	0.318129	0.31722	0.286311	-0.41696	-0.44344	0.262868	0.215457	-0.438022	0.29344	-0.42403	0.31411	0.307641	0.233017	-0.448495	-0.426611	0.195414	0.275583	0.469085	0.277011	0.148673	0.130864	-0.451994	0.304987	-0.426144	0.284574	0.197698	-0.429459
pten_dependent_cell_cycle_arrest_and_apoptosis	0.115117	0.0602796	-0.0118144	0.00939441	0.0248225	0.094615	0.0192002	0.0271377	0.00795517	0.037837	0.0293938	-0.00773322	0.0159569	0.0464649	0.0833464	0.000162436	0.0519481	0.0943857	0.0221087	0.11479	0.104173	0.0707718	0.0487369	0.0352913	0.0890371	0.0552456	0.0143228	0.0624277	0.101313	0.0462487	0.0159912	0.044003	0.0966905	0.0128214	0.0795428	0.0104637	0.0264285	0.0950846	0.0466974	0.0434111	0.00397135	0.0385702	0.0341366	0.0700434	-0.021812	0.0196364	0.0647249	0.0330629	0.0478607
multi-step_regulation_of_transcription_by_pitx2	-0.0672297	-0.116337	-0.0948114	-0.053238	-0.0454883	-0.0565236	-0.0676054	-0.0265926	-0.0477517	-0.0101806	-0.00684609	-0.00143757	-0.0155749	-0.0554856	-0.0254811	-0.130661	-0.0801671	-0.0783273	0.0292839	-0.0866782	-0.0244767	-0.0667725	-0.0139699	-0.0669945	-0.0328824	-0.053585	-0.0095446	-0.066325	-0.0913813	-0.0538408	0.0166575	0.00533729	-0.044168	-0.0689037	-0.0555589	-0.0757724	0.0135333	-0.0516292	0.0160347	-0.0520325	-0.0782456	-0.069495	-0.0807639	0.0868657	-0.01274	0.0234386	-0.131687	-0.0673452	-0.0546391
granzyme_a_mediated_apoptosis_pathway	-0.149008	-0.0216142	0.0764616	-0.0108911	-0.102389	-0.0562041	0.0438013	-0.135205	-0.0955323	0.0722322	-0.0322584	-0.188153	0.0830148	0.088349	-0.112909	-0.0550426	-0.208395	-0.0347313	-0.0664198	-0.0406197	-0.0129268	0.106651	-0.125682	-0.176643	0.138236	-0.137855	0.0130299	-0.127645	0.059907	-0.0651574	-0.165526	0.111458	-0.191244	-0.0522626	-0.0187404	0.0133458	-0.0601144	-0.155905	-0.0893855	0.00300818	-0.0437636	0.197188	-0.0221805	-0.0966632	-0.10525	-0.0139977	0.00364922	0.0152213	0.135698
S6K1-mediated_signalling	0.0231889	-0.119936	-0.0521656	0.111153	0.121134	0.254783	0.235224	0.160505	-0.0098976	-0.037603	0.173672	0.103996	0.149866	0.059189	0.0989536	0.219702	-0.0181816	-0.124444	0.0368812	0.190427	-0.0152372	0.199194	0.0271166	-0.0643953	0.140727	0.0500212	0.170934	0.200109	0.107787	0.150485	-0.00316717	0.0369329	0.236129	0.0425824	-0.191821	0.180378	0.190653	0.0325696	0.242268	0.0290068	0.0349817	-0.0708192	-0.0296944	-0.0465572	0.189091	0.0684911	-0.0133464	-0.138941	0.119744
S6K1_signalling	0.0945534	-0.0145909	-0.157256	-0.0110008	0.190678	-0.0371619	-0.032873	0.0505474	0.0446315	-0.000920727	0.132463	-0.185587	-0.054433	-0.131005	0.101267	-0.0255721	-0.128963	-0.159448	0.0164754	-0.111201	-0.0820303	0.0764761	0.0513481	0.0985282	-0.111705	0.241595	-0.0992121	-0.207574	-0.182145	-0.0169981	0.0460207	0.178551	-0.154123	0.144616	-0.0180501	-0.0177607	-0.00545094	-0.197754	0.0221089	-0.0574726	-0.0999635	-0.162846	-0.0902292	0.0257793	0.121829	0.0487179	0.0570292	-0.0198586	0.0627727
Regulation_of_Signaling_by_NODAL	0.0202111	0.1514	0.0725339	0.145312	0.128234	-0.0180769	-0.0316762	0.00807272	0.107804	0.245813	0.133044	0.245651	0.0549448	0.0602507	0.168144	0.127594	0.138791	0.0275555	0.138253	0.0666344	0.209172	0.140403	0.152353	0.0531674	-0.0609993	-0.0020939	0.199827	0.230585	0.0531226	0.232286	0.10002	0.277652	-0.0432553	0.183393	-0.0297245	-0.112144	0.174088	0.237502	0.11249	0.315293	0.277804	-0.00887249	0.0981244	0.137941	0.118802	0.0785682	0.00867422	0.197677	-0.00173992
Release_of_eIF4E	0.0198446	-0.0162237	-0.025293	0.130688	0.0799356	0.229964	0.17026	0.0999875	-0.0127147	-0.0383352	0.114465	0.0635542	0.0901278	0.161182	0.0533654	0.200385	0.0337591	-0.0940741	0.0166099	0.139468	0.0305543	0.137852	0.0055678	0.00544181	0.145996	0.202196	0.120823	0.184175	0.106569	0.152627	-0.0158566	0.0184419	0.219216	0.0101377	-0.170532	0.12258	0.130749	0.0355142	0.158798	0.00553099	-0.0234216	-0.0102787	-0.06376	-0.0440224	0.129261	0.0507313	-0.0135011	-0.153357	0.123001
Signaling_by_NODAL	0.0521421	0.123575	0.0742311	0.163482	0.114531	0.0351338	0.0155472	0.115188	0.229241	0.203102	0.234344	0.153242	0.102261	0.0864471	0.175008	0.0523175	0.0962528	0.160486	0.240569	0.0297986	0.241846	0.064124	0.218076	0.013735	0.00781241	0.0805556	0.324953	0.149688	-0.0030877	0.209935	0.229994	0.25945	0.03544	0.24047	0.00773212	-0.0373755	0.256967	0.166214	0.18615	0.310757	0.159239	0.0771835	-0.0162809	0.218161	0.223903	0.144339	0.0436034	0.0705849	0.108057
AKT-mediated_inactivation_of_FOXO1A	-0.173805	-0.0582796	-0.0967729	0.0528115	0.0368393	-0.166278	0.0242676	0.0852514	-0.00334207	-0.0658264	0.0748982	0.0846242	0.059267	-0.0887146	0.0273299	-0.079521	0.0322799	-0.055861	0.0927699	0.0820576	-0.0389228	0.035378	-0.0135115	-0.0351257	-0.188334	-0.0110228	-0.0790316	0.0190286	-0.062937	-0.0413123	0.0335884	-0.129639	0.0713991	-0.0862697	0.0492305	-0.164246	0.0485794	0.0295092	-0.133781	-0.184131	-0.0308184	-0.276231	-0.0843123	0.0267936	0.00940819	-0.202894	0.0523158	-0.0448846	-0.0857864
Regulation_of_AMPK_activity_via_LKB1	0.259604	0.0235232	0.182986	0.183554	0.0342204	0.182065	0.0484936	0.310034	0.262138	0.220431	0.251704	0.19869	0.232706	0.152184	0.222601	0.160768	0.0348359	0.208111	0.259739	0.253864	0.249619	0.118303	0.276535	0.171534	0.0343742	0.209319	0.17419	0.269856	0.170574	0.304251	0.235071	0.179872	0.191067	0.203128	0.178535	0.251614	0.293471	0.307304	0.092807	0.189319	0.247608	0.14525	0.0384447	0.2573	0.0105954	0.218904	0.210641	0.0936338	0.131471
Regulation_of_gene_expression_in_beta_cells	0.341618	0.335561	0.270134	0.356784	0.328188	0.324206	0.325019	0.319728	0.324645	0.309306	0.300678	0.336664	0.288951	0.320006	0.318396	0.306401	0.315213	0.331723	0.352316	0.335928	0.31105	0.323621	0.362643	0.323495	0.338571	0.311512	0.29074	0.31907	0.325668	0.340169	0.321537	0.292326	0.327913	0.317268	0.289046	0.321906	0.357921	0.351942	0.317325	0.278831	0.320627	0.308033	0.300914	0.309209	0.337539	0.326784	0.250966	0.270853	0.326933
Regulation_of_Rheb_GTPase_activity_by_AMPK	0.256281	0.012267	0.150795	0.168305	0.0600009	0.237045	0.0819015	0.29083	0.183637	0.245404	0.223302	0.252049	0.262745	0.107689	0.274866	0.196719	-0.00511956	0.218868	0.241488	0.236677	0.195437	0.112681	0.293619	0.197992	0.0957452	0.165994	0.191012	0.27717	0.156073	0.254983	0.161124	0.196074	0.191464	0.129796	0.104338	0.229744	0.346784	0.270125	0.166649	0.222528	0.22753	0.12065	-0.0320913	0.235265	0.103786	0.186018	0.276699	0.0881755	0.143802
COX_reactions	0.462504	-0.420617	-0.349486	-0.360331	0.314332	-0.363826	-0.362335	-0.382893	-0.362284	-0.364494	-0.379038	-0.375698	-0.377548	-0.377599	-0.38387	-0.37395	-0.368348	-0.314435	-0.363877	-0.355243	-0.430845	-0.285345	-0.371638	0.437783	-0.359663	-0.357555	-0.358583	-0.427504	-0.377805	-0.444156	-0.37688	-0.343524	-0.415889	-0.448011	0.205375	-0.364442	-0.366087	-0.442049	-0.42956	-0.36583	-0.386748	-0.374362	0.193091	-0.378113	-0.366755	-0.358069	-0.289303	-0.396359	-0.376674
Miscellaneous_substrates	0.140993	-0.305961	0.134458	-0.341734	0.105757	0.136043	0.135215	-0.0313076	-0.00967723	-0.359539	0.125398	-0.0204512	-0.36148	-0.362351	-0.035751	-0.0329236	0.125767	-0.367337	0.13264	0.136715	0.0816475	0.136824	-0.0247451	-0.0422533	0.134336	-0.378198	0.148217	-0.047757	0.11575	0.0904546	0.128681	-0.349932	-0.407765	-0.444687	-0.095817	-0.0127488	-0.00619906	0.0999609	-0.423385	-0.382913	-0.351213	-0.394305	0.0828638	-0.0212626	-0.349554	-0.341402	0.130445	0.0830596	-0.0399683
Eicosanoids	0.464606	0.420317	0.45762	0.460099	0.465513	0.460596	0.460009	0.452792	0.460181	0.458928	0.452913	0.452462	0.449274	0.449577	0.445431	0.451007	0.44875	0.46943	0.457821	0.458741	0.442069	0.461156	0.456353	0.441207	0.460253	0.462703	0.458895	0.401049	0.38206	0.457051	0.455921	0.41117	0.425755	0.393565	0.410081	0.459972	0.462417	0.459717	0.408275	0.458304	0.44259	0.444787	0.402256	0.460777	0.462219	0.463877	0.456137	0.403836	0.447166
Fatty_acids	0.453078	0.461084	0.445534	0.449835	0.452832	0.451016	0.450789	0.45153	0.451128	0.422015	0.445147	0.445136	0.439255	0.436969	0.43786	0.441631	0.438122	0.419261	0.447312	0.448859	0.406506	0.423587	0.446603	0.432894	0.447598	0.451909	0.420751	0.415149	0.427664	0.443838	0.447682	0.445743	0.455005	0.447044	0.402153	0.449135	0.460459	0.422291	0.421345	0.420769	0.44297	0.378374	0.394418	0.451956	0.451632	0.452536	0.449074	0.409423	0.436916
CYP2E1_reactions	0.341743	0.353254	0.374728	0.384616	0.349674	0.384712	0.368912	0.375351	0.361735	0.390131	0.377307	0.378017	0.378697	0.333368	0.383991	0.37355	0.369739	0.39664	0.361778	0.382442	0.307269	0.351857	0.368056	0.363811	0.327025	0.339029	0.374976	0.20367	0.312912	0.324471	0.38931	0.343334	0.308796	0.286822	0.32688	0.383373	0.401927	0.381467	0.202208	0.358573	0.384969	0.359178	0.317185	0.385258	0.394311	0.383136	0.342435	0.329637	0.347516
Aromatic_amines_can_be_N-hydroxylated_or_N-dealkylated_by_CYP1A2	0.391322	0.389523	0.374721	0.384641	0.388187	0.387878	0.388495	0.373128	0.389369	0.38166	0.378627	0.381351	0.383613	0.360999	0.367372	-0.070514	0.366704	-0.0613143	0.381711	0.384795	0.382688	-0.0459472	0.378679	0.361873	0.376212	-0.0584362	0.378473	-0.0796109	0.342651	0.368502	0.383767	-0.0540162	0.401447	-0.0778121	0.310323	0.384024	0.394097	0.382122	0.397386	0.100734	0.359149	0.343268	0.293569	0.3905	0.404479	0.40746	0.388033	0.295419	0.360999
Regulation_of_gene_expression_in_late_stage_(branching_morphogenesis)_pancreatic_bud_precursor_cells	0.205846	0.243662	0.226855	0.245669	0.190914	0.14623	0.274283	0.22969	0.21076	0.159572	0.10738	0.205627	0.105146	0.206012	0.135493	0.210952	0.213769	0.163928	0.170511	0.112021	0.25719	0.175739	0.234259	0.128996	0.209978	0.124874	0.147106	0.189825	0.106992	0.188661	0.134936	0.268308	0.200482	0.246013	0.19796	0.209706	0.156855	0.110725	0.122459	0.135889	0.124695	0.275534	0.084837	-0.161449	0.113613	0.265175	-0.148847	0.14081	0.105199
Regulation_of_gene_expression_in_early_pancreatic_precursor_cells	0.31964	0.323171	0.306676	0.335803	0.344245	0.318398	0.327079	0.324974	0.333957	0.346895	0.310165	0.3162	0.302732	0.302537	0.35741	0.336147	0.303001	0.349973	0.334431	0.318717	0.268761	0.369693	0.32705	0.29923	0.344767	0.314872	0.311156	0.289755	0.281986	0.304278	0.327729	0.301396	0.325015	0.302906	0.265537	0.319784	0.331865	0.311955	0.344049	0.34327	0.321391	0.292995	0.287026	0.14856	0.318382	0.326374	0.161226	0.257209	0.303808
Transport_to_the_Golgi_and_subsequent_modification	0.388317	0.0751413	0.0625421	0.1366	0.151239	0.355115	0.325035	0.198121	0.357247	0.307454	0.342903	0.346227	0.142104	0.360014	0.332669	0.350851	0.3315	0.276817	0.20785	0.351901	0.150805	0.131679	0.201376	0.184015	0.333082	0.367073	0.372531	0.27548	0.319116	0.19036	0.345864	0.0539604	0.26391	0.294915	0.138158	0.351665	0.178554	0.182254	0.250431	0.199058	0.320776	0.0443824	0.257001	0.206126	0.213995	0.294562	0.367678	0.253785	0.327323
ER_Quality_Control_Compartment_(ERQC)	0.39542	0.233276	0.267448	0.266953	0.19584	0.294483	0.263052	0.23216	0.341233	0.285114	0.304817	0.318134	0.222377	0.315464	0.289198	0.223567	0.260783	0.347088	0.239286	0.285286	0.23033	0.298023	0.234032	0.185326	0.242768	0.283495	0.243422	0.266875	0.282382	0.182342	0.205904	0.134156	0.274771	0.234233	0.164458	0.31772	0.120836	0.278207	0.244774	0.151221	0.245981	0.153736	0.215904	0.164362	0.213194	0.341378	0.369464	0.176266	0.250367
Termination_of_O-glycan_biosynthesis	0.0593707	-0.00979865	0.0669782	0.0693728	0.0854535	0.0489009	0.00217317	-0.031809	0.0256855	-0.0860034	-0.0680459	0.0646138	-0.0367659	0.0801286	0.108573	0.00901091	0.0400531	-0.0519974	0.0175727	0.0355951	-0.047804	0.00471904	0.0543314	-0.0215063	0.0737152	-0.0698732	-0.000595404	0.0504739	0.0284874	0.175675	-0.018995	-0.00328297	0.0404147	0.0536197	0.0258344	-0.00807203	0.00507868	-0.0451085	0.093988	-0.0466915	0.0341142	-0.0729111	0.0600423	-0.0611515	0.0077718	0.103561	-0.000264834	0.0761503	0.0473885
O-linked_glycosylation_of_mucins	-0.0644673	-0.0709827	-0.0935163	-0.100479	-0.0361587	-0.0705619	-0.105747	-0.0976666	-0.0928857	-0.146615	-0.107586	-0.0690762	-0.0624021	-0.056565	-0.0262461	-0.0999153	-0.0584025	-0.152877	-0.087612	-0.0106726	-0.134392	-0.109063	-0.0841677	-0.124805	-0.0663169	-0.123599	-0.0819971	0.012238	-0.0627806	0.0136185	-0.0726823	-0.100573	-0.0904029	-0.0220492	-0.10359	-0.144739	-0.0829248	-0.0567822	-0.0376655	-0.108268	-0.0316062	-0.140786	-0.0607682	-0.0974379	-0.0715256	-0.0474675	-0.0850913	-0.0173861	-0.11175
PLK3_signaling_events	0.0637506	0.0541455	-0.005417	-0.153093	-0.0899565	-0.257972	-0.154775	-0.196999	-0.220956	-0.0495998	-0.224088	-0.116625	-0.163384	0.0434621	-0.240893	-0.150489	-0.049264	-0.137478	-0.0386776	-0.133263	-0.0634551	-0.12254	-0.0930158	0.032608	0.121756	-0.0653957	-0.0740512	-0.0489032	-0.0132286	-0.0544297	-0.251833	-0.0942399	-0.0371864	-0.0525829	0.0816851	-0.242402	-0.160892	-0.119189	-0.0457524	-0.0821358	-0.255063	-0.0863184	-0.0106789	-0.0455218	-0.146686	-0.155162	-0.189528	0.00704111	-0.117748
nerve_growth_factor_pathway_(ngf)	0.106918	0.0318098	-0.155172	-0.0131992	-0.0739134	0.0610625	-0.047925	-0.0448394	-0.00171214	-0.0226296	-0.0186532	-0.0690311	-0.0559004	0.0393811	0.0483954	-0.0373796	0.0234614	0.0361193	-0.0614174	-0.0101492	0.0314811	0.00319167	0.0555599	-0.00235571	0.0349674	0.0291431	-0.0650286	0.0397867	0.0195154	0.0136665	-0.0604555	-0.0594359	0.0213336	-0.00241432	0.0873808	-0.0194315	-0.0184984	0.0463875	0.00591382	0.019504	-0.0461014	-0.015827	0.0268816	0.0705906	-0.0412855	-0.0300807	-0.0021192	0.0389568	-0.0123873
the_41bb-dependent_immune_response	0.0074324	-0.0847231	-0.0914571	-0.0355123	-0.0136034	-0.00170388	0.0540229	-0.0355867	0.0684665	0.0455845	0.141524	-0.023619	-0.0196742	0.107705	0.000106291	0.0712179	0.154761	0.0447662	0.00425899	0.0426506	0.245112	-0.0951444	0.0186366	0.102824	0.0637132	0.0111121	0.0571368	0.0700927	0.0128291	0.179436	-0.0626868	-0.0530073	0.18505	0.0327374	0.157262	0.0733677	0.00451283	0.0315343	0.0277262	0.0143705	0.0015732	-0.156744	0.0352858	0.042854	-0.0565924	-0.0304669	0.0635718	-0.0416907	-0.0808587
TGF-beta_receptor_signaling	0.0292917	-0.0597183	-0.071353	-0.0066764	-0.02466	-0.0389777	-0.0512229	0.0688183	0.0141852	0.00491719	0.0387795	-0.0116191	-0.0158296	-0.0260597	0.0497629	-0.00539498	0.0421915	0.0528336	0.0315617	0.0767355	-0.011301	-0.0180785	0.0496303	0.0485288	-0.0512123	0.0724139	-0.0449071	0.0325705	-0.00960096	0.000119368	0.0601458	-0.0107394	0.0166644	0.0268747	0.0269884	-0.0157544	0.0779704	0.0342402	0.02358	0.030543	0.0170817	-0.0545674	0.0234631	0.0217546	0.032312	-0.0565856	0.0155998	0.0118626	0.00160086
Insulin_receptor_mediated_signaling	0.269609	0.267454	0.336331	0.294612	0.29317	0.34118	0.300057	0.274541	0.294376	0.283036	0.280075	0.283282	0.257581	0.262092	0.269068	0.274037	0.26899	0.341777	0.285152	0.290981	0.256254	0.287783	0.2796	0.261804	0.284671	0.289056	0.298048	0.289311	0.200716	0.118429	0.281561	0.254533	0.330402	0.246836	0.255664	0.325556	0.299053	0.341857	0.246198	0.280834	0.25806	0.247986	0.244106	0.288238	0.290052	0.299258	0.32969	0.156182	0.257086
Spry_regulation_of_FGF_signaling	-0.0754315	-0.00854643	0.0282695	-0.104664	-0.0672283	-0.0434908	-0.0372058	-0.0021763	-0.0933196	-0.0388297	-0.0553415	-0.0754891	-0.00153227	-0.0410803	-0.0968924	0.00900555	-0.0461429	0.0226371	-0.0723217	-0.120727	-0.0643793	-0.0413832	-0.0745814	0.100233	-0.0872961	0.0736984	-0.103324	0.0164156	-0.079928	-0.0137685	-0.148533	-0.0314526	0.095849	-0.0563314	0.0482402	-0.0999692	0.0351614	-0.100898	-0.110354	-0.0289661	-0.0425746	-0.0131799	-0.0218906	-0.0574931	-0.0667781	-0.0847678	-0.160436	-0.073205	-0.0224474
Negative_regulation_of_FGFR_signaling	0.0755612	0.130995	0.0644675	0.0566954	0.0749075	0.00159764	0.030915	0.0630921	0.00449234	0.169862	0.0392292	0.0494769	-0.00931048	0.109799	0.0137285	0.0930873	0.111696	0.146102	0.0892848	0.118404	0.0147149	0.10428	0.0633779	0.140197	0.0797727	0.0218223	0.0315143	0.124846	0.0952424	0.0305784	0.0855569	-0.0225918	0.0736408	0.115014	0.0315853	0.00515238	0.100934	0.130703	0.0512174	0.157086	0.132813	0.0324067	0.0575776	0.0378837	0.126406	0.0910591	-0.0409247	0.0708997	-0.012129
PI-3K_cascade	0.0754205	0.120703	0.0409058	0.0632605	0.0802842	0.00643625	0.000105994	0.0654559	0.0113432	0.171702	0.0538316	0.0636874	-0.00647999	0.10944	0.0323992	0.0920273	0.118312	0.149748	0.0888452	0.143165	0.0583462	0.105922	0.101278	0.103121	0.0728326	-0.0241441	0.0288274	0.114912	0.131261	0.0218263	0.0953766	-0.0227422	0.0814337	0.15087	0.0252013	0.0039355	0.0849257	0.16656	0.0690103	0.152855	0.139284	0.0156133	0.0509166	0.0552525	0.136435	0.0818456	-0.00495246	0.0777877	-0.0268979
SHC-mediated_cascade	0.10336	0.164244	0.0323076	0.0483694	0.0788515	-0.0496528	-0.00633685	0.0377011	-0.0124366	0.158643	0.0277193	0.0428149	-0.0334634	0.0956086	0.022148	0.0862361	0.0934864	0.108453	0.036277	0.117837	0.0443319	0.0843393	0.0843903	0.0805691	0.0929345	-0.0204595	0.00438762	0.109908	0.0897002	0.00649727	0.0452282	-0.0227396	0.0727106	0.0983321	-0.00917507	-0.0183637	0.055683	0.124811	0.0709193	0.128439	0.120082	0.00889401	0.0309303	0.0137709	0.0784236	0.0743505	-0.0224912	0.0714128	-0.0452823
Phospholipase_C-mediated_cascade	0.0655376	0.1571	0.062396	0.0815514	0.0911716	-0.0272513	0.0118301	0.0767783	0.016215	0.21351	0.0696867	0.0733996	-0.00583769	0.107911	0.0268239	0.113587	0.141679	0.152181	0.064755	0.16602	0.0427252	0.130272	0.104033	0.100729	0.065667	-0.015161	0.00757014	0.113437	0.097402	0.0361747	0.085025	-0.0102768	0.0839326	0.122469	0.00382415	0.0171722	0.0672548	0.146798	0.0826801	0.159134	0.176001	0.0379979	0.0662982	0.0467197	0.121786	0.110707	-0.0298348	0.0894168	-0.0225761
FRS2-mediated_cascade	0.0950069	0.122753	0.0310469	0.0672704	0.098101	-0.0123784	-0.00468869	0.0404502	0.00938506	0.146055	0.0501139	0.0458788	-0.0273247	0.118066	0.0479155	0.0851903	0.091821	0.147413	0.070194	0.116254	0.0385731	0.0970676	0.0814193	0.108611	0.0903501	0.00496701	0.0351798	0.133639	0.104058	0.0100224	0.0734268	-0.0215309	0.0923834	0.138741	-0.00854111	0.00348654	0.102818	0.142477	0.074615	0.148282	0.127505	0.0235141	0.02239	0.0186416	0.125616	0.0881562	-4.54e-05	0.0597674	-0.0227946
NRIF_signals_cell_death_from_the_nucleus	0.156774	0.192912	0.155427	0.209455	0.180564	0.186646	0.213021	0.115113	0.166929	0.118769	0.177072	0.108075	0.14797	0.174457	0.125538	0.22191	0.109433	0.188524	0.111596	0.0152623	0.134626	0.193209	0.129069	0.110772	0.170491	0.219399	0.190019	0.111237	0.103952	0.209523	0.154809	0.114808	0.0908205	0.0693487	0.145368	0.207393	0.204451	0.104776	0.174426	0.18588	0.176352	0.210937	0.0844243	0.146453	0.147295	0.218568	0.124092	0.0980862	0.168799
NRAGE_signals_death_through_JNK	0.00415578	-0.0296576	-0.0695372	-0.0306626	0.0113826	0.0190154	-0.0536843	0.0367255	0.00459759	0.0136655	0.00619849	0.0183746	0.00326427	-0.000481069	0.0345555	-0.0817494	0.00550644	0.040233	0.0268089	0.0105956	0.0515134	-0.0199472	0.0521649	-0.0205693	-0.0299544	-0.0266029	-0.00147364	-0.000730036	0.0391211	-0.00257787	0.0150053	-0.0934161	-0.00586476	0.0148795	0.0456477	0.00506863	-0.0140072	0.0425394	0.0464056	0.0444516	-0.0307022	0.00447003	-0.00996077	-0.044514	-0.00287947	-0.0819064	-0.0601524	0.0423675	-0.0202098
NFG_and_proNGF_binds_to_p75NTR	0.0823177	0.30842	-0.108411	0.301004	-0.121039	0.297451	0.188262	0.060232	0.300554	-0.15303	0.167581	-0.131158	0.043635	0.263946	0.267979	0.163744	0.156883	0.140877	-0.125706	-0.0829509	0.205237	0.152769	0.160234	0.148651	0.169632	-0.0939728	0.167835	0.0596467	0.131923	0.0432996	-0.134282	-0.128738	-0.1048	-0.144687	0.218781	0.177276	0.0912668	0.0610041	0.265163	0.0614206	0.163704	0.252632	0.206987	-0.134	-0.122881	0.0969503	-0.120021	0.213572	0.156269
NGF_processing	0.276899	0.371598	0.113886	0.298655	0.118152	0.35877	0.30205	0.323859	0.359296	0.108043	0.284656	0.109284	0.259632	0.341982	0.162737	0.387056	0.342951	0.230887	0.0316845	0.115731	0.390064	0.337211	0.172253	0.335741	0.353738	-0.141966	0.353399	0.344179	0.219894	0.254505	0.110822	-0.00988686	0.126466	0.159933	0.306596	0.294317	0.28382	0.267805	0.348243	0.155779	0.128243	0.331606	0.29335	0.0288814	0.128527	0.291161	-0.114981	0.298763	0.272407
Insulin_receptor_recycling	0.0312	0.107828	0.110314	0.0998291	0.0555485	0.109771	0.147593	0.0783725	0.100375	0.0238562	0.082786	0.0631996	0.0217629	-0.0152002	0.109188	0.212491	0.140676	0.0637782	0.0894492	0.188314	0.00841714	0.0704313	0.121173	0.00102895	0.0697962	0.110412	0.115793	0.203288	0.0885159	0.100907	0.0685003	0.101527	0.112735	-0.0263726	-0.0249937	0.11681	0.0657367	0.0692011	0.0718067	0.190172	0.024915	0.0841022	-0.00304811	0.0708357	-0.0112414	0.136177	0.16003	0.0100328	0.162883
Negative_regulation_of_the_PI3K/AKT_network	0.0583948	0.0839014	0.0741602	0.100814	0.0935043	0.191295	0.192046	0.129266	0.168867	0.0718515	0.0709128	0.129302	0.15195	0.0184452	0.207925	0.0877096	0.10554	0.138445	0.152189	0.192399	0.130777	0.0324396	0.138771	0.120553	0.0301956	0.0293073	0.10873	0.0232981	0.0310501	0.0250227	0.204984	0.0653912	0.210319	0.0700404	0.151666	0.115147	0.153354	0.148689	0.0937992	0.121849	0.136296	-0.0485027	0.0746415	0.0501869	0.146489	0.11819	0.146689	0.101552	0.0828641
p75NTR_negatively_regulates_cell_cycle_via_SC1	-0.0541682	0.07369	-0.176079	-0.00666874	-0.188438	0.0402893	-0.00909564	-0.158527	-0.0105974	-0.185062	-0.0332335	-0.200207	-0.0138286	0.0140888	0.0123494	-0.036287	-0.0410513	0.0611541	-0.194183	-0.168363	-0.0108129	-0.0103158	-0.0954299	-0.0492424	0.0466206	-0.181651	0.00609272	-0.162717	-0.0838658	-0.117618	-0.283327	-0.0578765	-0.176174	-0.209785	-0.0638731	-0.023642	-0.0666751	-0.105213	-0.0308423	-0.105789	-0.0313565	0.0750691	-0.0334848	-0.107208	-0.190882	0.0409103	-0.190311	0.124436	-0.088042
NADE_modulates_death_signalling	-0.0480582	0.117476	-0.00975334	0.0368942	-0.0416	0.0363451	-0.0475264	-0.0353571	0.106099	-0.0165919	-0.0692847	-0.183066	-0.0140193	0.133769	0.0243695	0.115562	0.0302004	0.0736934	-0.0954168	-0.0431354	0.04072	0.167896	-0.00610972	-0.0475719	0.0494085	-0.174551	0.0998141	-0.0648882	-0.00392747	-0.0787619	-0.19009	-0.125742	-0.160962	-0.0615154	-0.0376762	0.00864175	0.0523131	0.0493197	0.0314622	0.0748168	0.0630204	0.0649948	-0.0471249	-0.126484	-0.177056	-0.0913375	0.0938537	0.068875	-0.0903523
mets_affect_on_macrophage_differentiation	-0.0398877	-0.121847	-0.112344	-0.165322	-0.0533122	-0.0703144	-0.0616079	-0.0565267	-0.0596175	-0.105522	-0.0852884	-0.122645	-0.0229767	-0.0593142	-0.0672653	-0.0175199	0.0700144	-0.0154418	0.0139712	-0.0981734	-0.00725371	-0.13527	-0.0917424	-0.00967793	-0.0978491	0.0327068	-0.0104748	-0.0580717	-0.0391996	-0.127508	0.00776659	-0.0925215	-0.0191051	0.0251303	0.0808717	-0.0647191	-0.0774261	-0.115933	-0.0458061	-0.0683087	-0.0419883	-0.0728059	0.0706101	-0.0778883	-0.0462172	-0.113222	-0.00184615	0.0941707	-0.0777906
LKB1_signaling_events	0.0748891	0.0389766	0.0552032	0.0625121	0.025912	0.0465362	0.121495	0.110256	0.0429219	0.0640677	0.0657403	0.0467631	0.0793577	0.0818828	0.091177	0.0785321	0.0203588	0.0517709	0.0753538	0.022293	0.098929	0.110199	0.108933	0.0144959	0.0447208	0.0642357	0.0618264	0.0807588	-0.0288742	0.106738	0.0593787	0.0381797	0.0701107	0.0138042	-0.0275659	0.0815781	0.00682658	0.0460816	0.111184	0.10637	0.061101	0.0796878	-0.00656577	0.0737963	0.0726799	0.0106148	0.0131272	0.0305951	0.0287301
p73_transcription_factor_network	0.0360214	-0.0350311	0.00820875	-0.0248715	0.00812295	0.0131761	-0.007734	0.0476726	0.00568471	0.0354859	0.033361	0.0159036	0.0332095	0.0347982	0.0125755	0.0299931	0.0500247	0.0778412	0.0374137	0.0118449	0.0646406	-0.0223324	0.0124953	0.0537466	0.0590931	0.0123321	0.0619191	0.0620987	0.0147877	0.0932538	0.050871	0.036895	0.0405834	0.0443468	0.0766423	-0.0127122	0.0230239	0.0352501	0.0524246	0.0463946	-0.0136805	-0.0249329	0.0102294	0.024577	0.0156046	-0.013133	0.0229629	-0.0075429	-0.0243279
S1P2_pathway	0.00331901	-0.0603889	-0.0400049	-0.0674101	-0.0129886	0.0366359	0.0173732	0.0293472	-0.0149074	0.0112708	-0.0678919	-0.0285118	-0.0603077	0.0414403	-0.0244039	0.0576213	0.0289032	0.0702052	-0.0279002	0.0495758	0.0618149	0.0464057	-0.00610733	0.0871812	0.0690337	0.0803924	-0.0190585	0.162192	0.0173588	0.0781169	0.0700842	0.0381824	0.0553216	0.0807786	0.160031	0.0315062	-0.0132445	0.0581321	-0.0188001	0.0723527	-0.00295268	-0.00517762	0.118077	0.0478382	-0.0204859	-0.00492363	0.0171118	0.140207	0.0403707
hemoglobins_chaperone	0.35473	0.309587	-0.0385769	0.40561	0.0730414	0.429702	0.357667	0.159227	0.429895	0.151704	0.166779	0.288173	0.420522	0.420192	0.407627	0.0129157	0.429922	0.411579	0.104507	0.437616	0.386677	-0.115159	0.345891	0.391396	0.322997	0.352677	-0.0614515	0.345959	0.266091	0.194419	0.312752	0.0113496	-0.040806	0.0820011	0.40425	0.429146	-0.0476813	0.20071	0.197619	0.0499884	0.283694	0.0917209	0.345484	0.354343	0.027035	0.344589	0.0204396	0.24808	0.330401
CDC42_signaling_events	0.0306919	0.0348453	0.0208105	0.0238987	0.0122007	0.0233053	0.0410415	0.0673143	0.031593	0.0414239	0.00532137	0.0294704	0.0442514	0.055345	0.0327176	0.032839	0.024004	0.0313557	0.0338177	0.0422752	0.0335529	0.0212789	0.0217825	0.0340304	0.0565024	0.0636259	0.0238827	0.079034	0.0153948	0.044954	0.00743705	0.0474513	0.141575	0.0310992	0.0734791	0.0126783	0.017784	0.0497715	0.0188607	0.0484118	0.00482763	-0.00801707	0.0126959	0.022095	0.0280463	0.0186599	0.0522275	-0.0170431	0.0135685
Vpu_mediated_degradation_of_CD4	0.161007	0.253288	0.267706	0.211816	0.238688	0.231487	0.300263	0.16294	0.24726	0.140745	0.183643	0.149076	0.249628	0.234437	0.189002	0.259403	0.173528	0.156512	0.172693	0.155002	0.137377	0.256586	0.150571	0.174165	0.287834	0.272173	0.294503	0.183206	0.195493	0.22735	0.127138	0.222426	0.121655	0.11518	0.147381	0.177895	0.239742	0.138205	0.167649	0.133287	0.196637	0.260115	0.126853	0.169481	0.153143	0.235743	0.242661	0.0700636	0.216546
ErbB1_downstream_signaling	-0.0100267	-0.0193188	-0.0121732	-0.0123051	-0.00314005	-0.0189669	-0.0126926	-0.000273645	-0.0053683	-0.0179962	-0.0293574	-0.00892754	-0.011537	0.00681578	0.0324675	0.0310599	0.0171096	0.0109491	-0.00914896	-0.009303	0.00412701	-0.0176588	-0.00839007	0.0599209	-0.0345907	0.0124391	-0.0032185	0.0905657	-0.0195438	0.0132114	-0.020609	0.0174569	0.0714006	-0.0141305	0.0492036	-0.0206547	-0.0177828	0.0308594	-0.0136084	0.0172289	-0.0249035	-0.00461199	0.00826037	-0.0381	-0.0281007	-0.0209688	0.0419971	0.0084719	-0.00982641
Nef_and_signal_transduction	0.0446748	0.0780098	0.142121	0.0691419	0.0769772	0.0377772	0.078873	0.077399	0.120266	0.129202	0.0710653	0.0726718	0.253552	0.123194	-0.0202716	-0.0303589	-0.0162247	-0.00770324	-0.00811046	0.0308695	0.320021	0.00785925	0.0716241	0.0680123	-0.00841286	-0.00038533	0.0642243	-0.0393503	0.293142	0.0923566	0.101957	0.116298	0.0578309	-0.0203977	0.322661	0.108785	0.00827408	0.101386	-0.00966189	0.108096	0.135441	0.186312	0.264051	-0.0255551	0.032028	-0.00601287	0.0978258	0.252742	0.246536
Interactions_of_Tat_with_host_cellular_proteins	0.0534061	-0.0390899	0.0578288	0.0582281	0.0218768	-0.0930281	0.0665254	0.0344377	0.0539911	0.00577408	0.00990191	0.254383	-0.012352	-0.0133663	-0.00208359	0.000698244	-0.00548203	0.00639823	0.0164802	0.0229844	-0.037329	0.0602512	0.00659345	0.0211803	0.0393047	0.0138426	0.00608423	-0.104439	0.185627	-0.111167	-0.104148	0.0401642	-0.0736871	0.231827	-0.0707119	0.0499094	0.0385104	0.0115668	-0.0670654	0.00469127	0.0121915	-0.00116309	-0.0780337	-0.100124	0.0510397	0.0641065	-0.0743228	-0.0522276	0.0243374
Nef_Mediated_CD8_Down-regulation	0.107321	0.0719671	0.106	0.0401902	0.101831	0.101735	0.102885	0.0286629	0.0647794	0.125191	0.0815004	0.00500986	0.17068	0.139096	0.0799894	0.0979599	0.0336964	0.145336	0.0290893	0.103673	0.101474	0.101254	0.0488811	0.0205991	0.12738	0.125449	0.0154268	0.0179449	0.158368	0.103834	0.0866577	0.140419	0.146718	0.02642	-0.0381792	0.127436	-0.0409327	0.0316721	-0.0687826	0.139463	0.175934	0.189151	0.120141	0.042365	0.0506877	0.0829081	0.116581	0.101096	0.248819
Nef_Mediated_CD4_Down-regulation	0.0597541	0.0744159	0.120084	0.0113872	0.0537152	0.12765	0.0996261	0.0191851	0.102167	0.0949994	0.0614033	0.0547914	0.216586	0.0685118	0.0340611	0.0515196	0.131269	0.0882009	-0.0035298	0.0585055	0.1838	0.182011	0.0103666	0.122287	0.0556841	0.0648072	0.0949609	0.0012758	0.163971	0.119941	0.0399631	0.136885	0.095385	-0.0196207	0.117526	0.115285	0.100691	0.0789523	0.046162	0.121193	0.206474	0.290169	0.220217	0.00480976	0.0146918	0.0452104	0.069195	0.190465	0.295109
Nef_mediated_downregulation_of_MHC_class_I_complex_cell_surface_expression	0.0793872	-0.024638	0.0553723	-0.0248395	0.0894438	0.152912	0.12263	0.105545	0.124706	-0.0148478	0.00645579	0.0569868	0.12175	0.0636881	0.0734358	0.10818	0.10315	-0.0387069	0.15512	0.127291	0.0691029	0.0331959	0.0542284	0.0575458	0.00152697	0.079294	0.0771534	0.079309	0.0738685	0.00797794	0.0747278	0.0451008	0.0261694	-0.0192325	0.0097417	0.0970336	0.0100285	-0.0574899	0.0498353	-0.0216267	0.0757483	0.0683762	0.0604254	-0.0101922	0.0820494	0.113561	0.188879	0.0434099	0.08559
Nef_mediated_downregulation_of_CD28_cell_surface_expression	-0.0228537	-0.101089	0.242161	-0.0988535	0.197184	-0.0216982	-0.0200446	0.138777	-0.01529	0.0322425	-0.0280733	0.141076	-0.0704151	0.0125249	-0.0617887	0.0500426	-0.0456746	-0.0350485	0.171825	-0.0383991	0.126391	-0.0191945	-0.0530185	-0.069047	-0.122093	0.0545878	-0.0208392	-0.0379408	0.299416	0.310548	0.143892	0.390233	0.352076	-0.0694517	0.103249	0.04772	-0.0328679	-0.0581547	-0.0397619	0.0501468	-0.0802011	0.303517	0.278523	-0.0255154	0.135796	0.0644289	0.0789224	0.0353434	0.303462
gata3_participate_in_activating_the_th2_cytokine_genes_expression	-0.061197	-0.0415624	-0.0221304	-0.0104926	0.0596315	0.093591	0.0207529	0.0344651	0.0294567	-0.0463602	0.0452661	0.0802494	-0.0040469	0.0786763	0.0573361	-0.00902924	0.116823	0.0703058	0.0754508	0.0384105	0.123571	-0.0580803	0.0244035	0.111835	0.0539273	-0.000792888	0.0034887	0.0908271	0.0978231	0.146177	0.0586253	0.0344899	0.151829	0.094091	0.111108	0.114104	0.106123	0.0234597	0.039646	-0.0704649	0.0370219	0.0276599	0.0614745	0.0891952	0.137355	-0.0578779	0.0570533	0.0474458	0.0200843
Serotonin_Neurotransmitter_Release_Cycle	-0.0253017	0.176677	-0.0226816	0.133492	-0.0653371	0.0535016	-0.000650898	0.0170047	0.0495662	0.0304575	0.111039	-0.0329063	0.0381081	-0.0143198	0.0272785	0.0693822	0.0156171	0.0165156	0.0220567	-0.0578858	0.00815484	0.154088	0.00648422	-0.0324046	0.00862178	0.107059	0.0402935	0.162585	-0.123866	0.0170525	0.0172417	0.0963807	-0.0234977	0.0710508	0.0188237	0.0204505	0.108916	0.0928267	0.0249686	0.0314747	0.0696013	0.0689196	-0.0933222	0.117446	0.0324857	0.128015	0.00984351	-0.0649006	-0.0364229
Norepinephrine_Neurotransmitter_Release_Cycle	0.0334425	0.148095	0.0366805	0.111905	-0.00921816	0.0641393	0.0213265	0.0271544	0.129089	0.0433404	0.0521525	0.0241034	0.013271	0.0528207	0.0349633	0.0576651	0.0200028	0.0344151	0.0252039	-0.00618386	0.0276119	0.195119	0.00630541	-0.00323146	0.0848116	0.0498888	0.0616891	0.13347	-0.0762195	0.0287178	0.0206913	0.0368594	0.0337692	0.0354198	0.039667	0.0211289	0.138821	0.0332467	0.0363954	0.0450443	0.0641419	0.0958683	-0.0599389	0.0595703	0.109062	0.123302	0.0389572	-0.0201589	-0.0458242
Depolarization_of_the_Presynaptic_Terminal_Triggers_the_Opening_of_Calcium_Channels	-0.117376	-0.156308	-0.068662	0.13296	-0.12554	-0.189729	-0.103189	-0.106981	0.15555	0.00496099	-0.0405033	-0.129004	-0.0896271	-0.157042	0.0757307	-0.131335	-0.138797	-0.160412	-0.00858204	-0.11905	-0.170203	0.010884	0.0613386	-0.147589	-0.201547	-0.139743	-0.198242	-0.172504	-0.209726	-0.0628665	-0.087246	-0.0835278	-0.176119	-0.149435	-0.0947424	-0.0808299	0.0204614	-0.133938	-0.0310981	0.00371907	-0.123283	-0.0814089	-0.253405	0.0429229	-0.150164	-0.12215	0.0935208	-0.151427	-0.0844625
GABA_synthesis__release__reuptake_and_degradation	0.0564973	0.0770787	0.00260608	0.0526045	-0.0234316	0.0413785	0.0152712	0.0246749	0.0593404	0.0465108	0.0293637	0.0382723	0.0332556	0.0249397	0.0135346	0.0454127	0.0164593	0.0475315	0.0124698	-0.0186652	-0.0169376	0.106897	0.0697901	-0.00540863	0.0457841	0.0358708	0.0289049	0.0713279	-0.0888114	0.00406464	0.00746996	0.0114516	-0.0158102	0.0141583	-0.0309056	0.0950268	0.095404	0.0228707	0.0114353	0.0185941	0.0409042	0.0396123	-0.0538111	0.0462463	0.068527	0.0823147	0.0122012	-0.0323746	-0.0818591
Acetylcholine_Neurotransmitter_Release_Cycle	0.0718793	0.15491	0.0507979	0.121613	0.0342448	0.109998	0.0717931	0.0865244	0.147623	0.101396	0.0995068	0.0737509	0.0612678	0.0977235	0.0467654	0.113684	0.0673559	0.0931452	0.0742683	0.0476636	0.0362113	0.207384	0.0573567	0.0461972	0.127337	0.0978444	0.117868	0.137518	-0.0343904	0.0999062	0.0722908	0.0519637	0.0518141	0.0835267	0.0534063	0.0716154	0.187962	0.0562807	0.0948647	0.103633	0.117345	0.108805	-0.00426674	0.106687	0.159892	0.17191	0.0540811	0.0322223	-0.0268132
Dopamine_Neurotransmitter_Release_Cycle	-0.019095	0.182079	-0.0172139	0.138931	-0.058931	0.0595083	0.00491358	0.0232955	0.0557581	0.0368919	0.117126	-0.0265648	0.0444268	-0.00766181	0.0336877	0.0754579	0.0219272	0.0228694	0.0281438	-0.0515886	0.0146946	0.159593	0.0126893	-0.0260557	0.0149372	0.113289	0.0465593	0.168377	-0.116613	0.0234912	0.0237245	0.102018	-0.0171507	0.0773053	0.0251394	0.0265134	0.114706	0.098932	0.0313226	0.0378871	0.0760399	0.0750671	-0.0869374	0.123626	0.0386177	0.133231	0.0158305	-0.0580411	-0.030132
Glutamate_Neurotransmitter_Release_Cycle	0.0904495	0.148069	0.0839954	0.138323	0.0551092	0.145443	0.0607774	0.0782895	0.136636	0.0210739	0.105626	0.0804605	0.0500044	0.0797508	0.0559299	0.0826096	0.0762673	0.0141771	0.112269	0.0568091	0.0659843	0.176332	0.0970442	0.035413	0.0895155	0.131436	0.0395056	0.139911	-0.0292524	0.103804	0.0804876	0.0164205	-0.0174545	0.121188	0.0682213	0.0787622	0.157167	-0.0231071	0.111462	0.0214068	0.11654	0.122585	0.0142877	0.112745	0.148294	0.14264	0.0645682	0.0703445	-0.0121836
GABA_synthesis	-0.0697491	-0.062284	-0.0553446	-0.0606851	-0.0878993	-0.071482	-0.0513686	-0.0917882	-0.0692582	-0.0885161	-0.0848721	-0.0795661	-0.10696	-0.107379	-0.0972543	-0.0858482	-0.0977616	-0.0904596	-0.0766427	-0.0685679	-0.127578	-0.0646953	0.272439	-0.106321	-0.101632	-0.0809216	-0.10379	-0.0997862	-0.155539	-0.106302	-0.0864131	-0.078167	-0.0726225	-0.10224	-0.158915	0.284302	-0.0634056	-0.0883109	-0.0905671	-0.0892328	-0.118559	-0.142618	-0.163491	-0.0765235	-0.0726489	-0.0535809	-0.0561913	-0.183637	-0.0993002
EGFR-dependent_Endothelin_signaling_events	0.0908684	0.0914008	0.0103716	0.123174	-0.0646909	0.0435158	0.0436414	0.0284489	-0.0755249	-0.0163986	-0.0827664	-0.0021991	0.0666859	-0.00565346	0.0563854	-0.0217745	-0.0368837	-0.0561016	0.00292369	0.0216997	0.0287073	-0.0543963	-0.00265168	-0.0259156	0.0421833	-0.035392	-0.0498222	-0.0258127	-0.00199907	0.00920632	-0.0129341	-0.0516352	0.00095235	-0.0174747	0.0713871	-0.0766338	0.0360301	0.0387189	-0.00266293	0.00125783	-0.0286967	-0.0357801	-0.0105157	-0.0187391	-0.00879568	-0.0316953	-0.02678	0.0744436	-0.0964122
Nonsense_Mediated_Decay_Enhanced_by_the_Exon_Junction_Complex	0.180805	0.258504	0.246929	0.19989	0.133821	0.00289974	0.2517	0.0113332	0.026231	0.227124	0.0220073	-0.163751	-0.00952827	-0.00439604	-0.0402917	0.11352	-0.138539	0.281693	-0.111223	-0.196491	-0.128403	0.264931	-0.15371	0.0902349	0.0596916	0.113941	0.125834	-0.110905	-0.0458484	0.0179552	0.0907033	0.26863	0.0194235	-0.0261011	-0.130897	0.146614	0.28715	-0.163406	-0.006687	0.211235	0.0117591	0.254021	-0.220006	0.0185887	-0.0236556	0.323462	-0.023842	-0.231594	0.234568
Stabilization_of_mRNA_by_HuR	-0.102298	-0.0944383	-0.176831	-0.103701	0.158588	0.153506	-0.0409869	-0.12701	-0.142621	0.252942	0.18116	-0.121881	-0.151935	0.129024	0.161119	-0.183471	-0.134021	0.012288	-0.0815341	0.121974	-0.171871	-0.0984824	-0.0636995	-0.164359	0.211796	0.183467	-0.104388	-0.11487	0.141452	0.18461	-0.12357	-0.0972691	0.179728	-0.114647	-0.169603	0.195197	0.199721	-0.0834604	-0.100301	-0.0891068	-0.27038	0.218396	-0.240846	0.194454	-0.109866	0.203408	-0.10201	-0.206745	-0.100222
Destabilization_of_mRNA_by_KSRP	-0.0799559	0.0763402	0.126808	0.124766	0.0753136	0.0339702	0.132034	-0.0175986	0.0357821	0.107499	0.0344201	-0.0809858	0.00255423	0.0291943	0.0370091	0.161367	0.035364	0.236854	-0.0700333	-0.110222	-0.0323125	0.0692485	-0.0723978	0.0631956	0.0805487	0.167728	0.124053	0.0489985	-0.026179	0.0373613	-0.00163244	0.0693328	0.0612632	0.0120617	-0.0673869	0.0710673	0.111953	-0.0927215	-0.0385201	0.0986168	0.124814	0.0202581	-0.0153062	0.0239793	-0.0545593	0.110884	0.133791	-0.0142764	0.159249
Destabilization_of_mRNA_by_Tristetraprolin_(TTP)	-0.0273882	0.0498747	0.117163	0.0621696	0.0659402	0.0149938	0.0961589	0.000223606	0.0118393	0.0530244	0.0306837	-0.062796	0.0256812	0.0464319	0.0324332	0.0805456	0.0431525	0.156086	-0.0525631	-0.122395	-0.0448869	0.0801173	-0.00416239	0.0828867	0.0814623	0.0358495	0.0988698	0.0515383	0.0076735	-0.0860073	-0.0411524	0.0563651	0.000191759	-0.079557	-0.133555	0.0217918	0.0856098	-0.0277129	-0.0332136	0.0645341	0.0784576	0.034074	-0.0680308	-0.037854	-0.0594996	0.108671	0.135435	-0.0945692	0.0904169
Destabilization_of_mRNA_by_Butyrate_Response_Factor_1_(BRF1)	0.0863745	0.102003	0.192603	0.0293602	0.0352077	0.0714885	0.0621853	0.07354	-0.0312031	0.0184656	0.080828	0.00459346	-0.00668681	0.0148904	0.00533855	0.0473607	0.0617077	0.199381	-0.101406	-0.135832	0.0225757	0.121535	0.0323109	0.0894665	0.0454969	0.0573328	0.0606936	0.0562515	-0.0344126	0.0225296	0.0209494	0.0236397	0.0462927	0.0222705	-0.0504936	-0.00817275	0.131807	0.142477	0.0262874	0.153679	0.0444733	-0.00418862	-0.00145545	-0.0860057	0.038796	0.074342	0.0826598	-0.0853314	0.0510975
Destabilization_of_mRNA_by_AUF1_(hnRNP_D0)	-0.0240138	0.241852	0.0303211	0.21007	-0.0043087	-0.0273939	0.101815	-0.0346667	0.0034493	0.00628037	-0.040976	0.00391954	-0.0316135	-0.0291529	0.0282125	0.0226983	-0.0793397	0.0475465	-0.0147153	-0.106868	-0.10727	0.230007	-0.0548848	-0.00322722	0.00437662	0.0517423	0.209551	-0.0590793	0.143072	-0.036882	-0.0394453	0.0359972	-0.0727413	-0.0201169	-0.0654387	0.0145605	0.0880645	-0.0856024	0.181026	0.0360593	0.0013277	-0.0245386	-0.0983349	0.0147843	0.027234	0.0466472	-0.0120486	-0.141528	0.276625
mRNA_Decay_by_5__to_3__Exoribonuclease	0.0447792	0.0282154	0.0517586	-0.0418632	-0.0241734	-0.0185691	0.0417434	-0.0634477	0.0787323	0.183655	-0.0251336	-0.15984	-0.095621	0.150098	-0.0227646	-0.0586838	0.074098	0.234121	-0.000219191	-0.0224885	-0.0669206	0.0173868	-0.0916744	0.0491399	0.0857271	-0.0946487	0.107893	0.0195188	0.0152715	0.0208446	-0.0066879	0.0617077	0.0135927	0.00722898	-0.190168	0.0315926	0.00119343	-0.0088773	-0.0259401	0.164156	-0.168952	0.0212288	-0.187591	-0.0563329	-0.00797014	0.0740649	-0.0808303	-0.11673	-0.0064645
mRNA_Decay_by_3__to_5__Exoribonuclease	-0.0215797	0.164636	0.333582	0.251465	0.211532	0.154421	0.266592	0.046071	0.157309	0.206296	0.146256	-0.0636083	0.121906	0.221913	0.161279	0.256983	0.125377	0.301674	-0.0562182	-0.0701353	-0.0978924	0.249551	0.00611678	0.128721	0.259751	0.176667	0.259545	0.0545825	0.0885419	-0.0118681	-0.0175232	0.204997	0.0375602	-0.106866	-0.164799	0.143886	0.226442	-0.0839271	0.0976741	0.179364	0.250732	0.195513	-0.0028719	0.0235219	-0.0416853	0.296161	0.299625	-0.082236	0.264068
FGFR1c_ligand_binding_and_activation	-0.163381	-0.10402	-0.0676894	-0.102091	-0.0736694	-0.0528087	-0.008547	-0.0367816	0.00506058	0.0229087	-0.173904	-0.16978	-0.191799	-0.111021	-0.187185	-0.0625927	-0.173541	-0.122238	-0.033372	-0.0767569	-0.0631596	-0.1119	-0.164234	-0.0759614	0.0233287	-0.103189	-0.0563569	-0.00996932	-0.108579	-0.112786	-0.102913	-0.176652	-0.15629	-0.118333	-0.0348977	-0.0909363	-0.153816	-0.0972469	-0.0865738	-0.0393649	-0.0651406	-0.216513	-0.198335	0.0376749	-0.0300294	-0.124867	-0.0847118	-0.119062	-0.159186
FGFR1b_ligand_binding_and_activation	0.115985	0.123367	0.124085	0.126758	0.12251	0.115268	0.203888	0.16433	0.216191	0.159943	0.111372	0.109537	0.110039	0.0751185	0.0946874	0.0918612	0.0919778	0.134508	0.178106	0.185603	0.118524	0.205389	0.0991401	0.142312	0.11239	0.205513	0.227984	0.118615	0.0340073	0.0777823	0.174415	0.105336	0.0925819	0.0862915	0.0722074	0.282876	0.138996	0.0975714	0.0521435	0.235838	0.0649414	0.0634239	0.00833893	0.177515	0.183445	0.160042	0.192028	-0.0552685	0.0807968
GRB2_events_in_EGFR_signaling	0.155848	0.101529	-0.0304588	-0.0039425	0.0591132	-0.0328888	-0.00507715	-0.0379975	-0.104241	-0.0682542	-0.106844	0.00859991	0.10712	0.0256505	0.0935182	0.057361	-0.0753288	-0.0767161	0.00853388	-0.0242024	0.138333	-0.111109	0.104348	0.0837653	0.0279723	0.0305294	0.0305404	0.165819	0.113117	-0.0103971	-0.063588	-0.0347184	0.105112	0.085248	0.0315624	-0.101882	0.0990712	0.117059	0.0642131	0.0704338	-0.0655595	-0.0874894	-0.0403638	-0.010292	-0.101802	-0.0723277	0.0798037	0.182003	-0.124374
EGFR_interacts_with_phospholipase_C-gamma	0.196902	0.104977	0.0682494	0.10698	-0.0193119	0.0971535	0.076588	0.084378	-0.0155871	0.0343329	0.0289742	0.0901454	0.284006	0.014316	0.0726868	0.0758623	0.0226152	-0.0391204	0.091122	0.0959344	0.044582	-0.020632	0.137998	0.0642546	-0.0322667	0.0344226	-0.0331318	0.0736346	0.0321116	0.0754783	0.0377055	-0.0273738	0.110149	0.074869	0.00882316	0.0437967	0.106509	0.0817656	0.0757063	0.056708	0.0527583	-0.0775088	0.00408275	0.113009	-0.0197311	0.00175327	0.062845	0.200847	-0.0480677
GAB1_signalosome	0.129029	0.0752221	0.0541371	0.075318	0.0623369	0.113762	0.0636374	0.082145	0.0594412	0.0535117	0.0475286	0.092529	0.156886	0.086042	0.113859	0.0532165	0.0454801	0.0391546	0.119453	0.0958248	0.0896403	0.0501504	0.101743	0.0458434	0.0310293	0.0318481	0.0370311	0.0662786	0.115431	0.0493799	0.078701	0.0386098	0.139636	0.126155	0.0782915	0.0481832	0.106222	0.0949543	0.111451	0.0807121	0.0338161	-0.015696	0.0322082	0.119424	0.111898	0.0409035	0.0961156	0.160936	0.0235171
SHC1_events_in_EGFR_signaling	0.206394	0.15341	-0.0221458	0.00693268	0.052275	-0.0273845	0.00932628	-0.0273264	-0.0675049	-0.0482074	-0.0732779	0.0117323	0.0751086	0.0804144	0.0716759	0.043708	-0.0576261	-0.0571536	0.0117905	-0.0198099	0.0970741	-0.0733488	0.106146	0.0608033	0.0226652	0.0264925	0.0253697	0.149066	0.133114	-0.0197355	-0.046888	-0.0214991	0.114202	0.0639366	0.0014817	-0.0672162	0.0855478	0.09217	0.112705	0.055078	-0.0572352	-0.0762208	-0.0542359	-0.0053178	-0.0676471	-0.0370809	0.0629079	0.117943	-0.0645
Fibroblast_Growth_Factor_Receptor_(FGFR)_signaling	-0.101936	-0.149769	-0.066158	-0.0775986	-0.0805351	-0.109419	-0.0407864	-0.0488838	-0.104692	-0.0861562	-0.0880084	-0.0874042	-0.11021	-0.0912488	-0.0963556	-0.0699502	0.109232	-0.0913029	0.116166	-0.0812827	-0.126031	-0.067074	-0.127633	0.0145056	-0.0706042	0.17777	-0.0758047	0.196414	-0.0967666	0.00507389	-0.105935	-0.0967958	0.211534	-0.0569316	-0.0530164	-0.0656916	-0.0686849	-0.188281	-0.0994499	-0.0575746	-0.19534	-0.0776013	0.10038	-0.090308	-0.103226	-0.0461689	-0.131133	-0.0490524	-0.085799
EGFR_downregulation	0.126162	0.116798	0.108941	0.09396	0.0789666	0.099565	0.118753	0.0854636	0.0573056	0.0782258	0.118165	0.0416407	0.12509	0.0709948	0.0764893	0.0991081	0.0487591	0.113253	0.0553378	0.111256	0.0705751	0.0888121	0.0856345	0.0878396	0.0902634	0.147518	0.0356201	0.051754	0.0467824	0.1048	0.0816027	0.102019	0.132438	0.0544279	0.0429105	0.0906011	0.131261	0.0184044	0.0631587	0.0536078	0.0990585	0.0565395	0.0440232	0.0830145	0.0248455	0.0671244	0.0781651	0.0349351	0.0918604
Fanconi_anemia_pathway	0.0493644	0.00966146	-0.0646046	-0.0866158	-0.0490539	-0.0549955	-0.0910395	-0.0921025	-0.0749813	0.101419	-0.0445893	-0.021719	-0.0412956	0.0846518	-0.065671	-0.0739504	-0.0495551	0.0458467	-0.0078943	-0.0645263	-0.0398497	-0.0519321	-0.0811897	-0.118142	0.0342741	-0.0258277	0.0573737	-0.00662251	-0.0508725	-0.0624534	-0.0745836	0.0481375	-0.0600837	0.00481283	-0.0979276	-0.060821	-0.0114268	-0.0331176	0.00270605	-0.0739327	-0.0954783	-0.0683832	-0.16358	-0.0477898	-0.0410686	-0.00798529	-0.00683425	-0.105914	-0.129639
ifn_gamma_signaling_pathway	-0.0270401	-0.0600176	0.0499346	0.0587676	-0.0241226	-0.0345449	0.020364	0.0272924	0.0789822	-0.112578	0.0582504	0.0176867	0.0265923	0.0882485	0.0339711	0.0512997	-0.0532903	-0.0123905	-0.0634736	0.0457505	0.230374	-0.0968382	0.0249837	0.136389	-0.0393574	0.021506	-0.0540451	-0.0325279	-0.0504648	-0.0105381	0.0455475	-0.0811593	-0.0100465	-0.0552415	0.216781	0.0800927	0.109278	-0.0473316	-0.00844554	-0.102848	0.0528721	0.118304	0.203662	0.00530238	0.108635	-0.0631273	0.14183	0.263984	0.111937
pertussis_toxin-insensitive_ccr5_signaling_in_macrophage	-0.13928	-0.0653335	0.0613999	-0.169505	-0.17679	0.03734	-0.0353831	-0.153651	-0.0547301	-0.0686471	-0.102027	-0.187685	0.142252	-0.207619	0.0325197	-0.0590687	0.126045	-0.0490078	-0.0759574	-0.0928043	0.287172	-0.0450132	-0.103935	0.0504907	-0.193768	0.033747	-0.195581	-0.113096	0.151372	-0.13126	-0.151257	-0.185764	-0.0851422	-0.068172	0.197789	-0.092005	-0.0816073	-0.091072	-0.195826	0.0191546	0.0731888	0.090941	0.230694	0.0359003	-0.0687539	-0.160882	-0.129181	0.112551	0.166317
tsp-1_induced_apoptosis_in_microvascular_endothelial_cell	-0.0412213	-0.0502437	0.142021	0.0969463	0.0357834	0.11875	0.144145	0.02943	0.0432154	0.0300636	0.00390848	-0.0311834	0.275762	0.131611	0.0785767	0.149205	0.244137	0.114681	-0.0531152	0.063972	0.384187	-0.000636181	0.037031	0.172986	0.0703187	0.149107	0.0818628	0.120334	0.170635	0.0373541	0.0104712	0.0125147	0.131323	0.176347	0.337951	0.0519834	-0.0724317	0.100747	-0.108159	0.0723116	0.234565	0.018446	0.311377	-0.0106456	-0.041495	-0.0698165	0.136988	0.312048	0.287175
regulation_of_p27_phosphorylation_during_cell_cycle_progression	0.0599589	0.124066	0.0573712	0.067744	-0.0464207	0.0329852	0.0368422	-0.0493782	0.0238724	0.0581516	-0.00182878	-0.09725	-0.0212232	0.0779467	0.0121037	-0.0335067	-0.015957	0.0481929	-0.0513634	-0.0142933	-0.012735	-0.000986913	-0.00531177	-0.0450197	0.138797	-0.0142662	0.0521512	0.0195102	0.056995	0.031735	-0.079018	0.124166	0.0163547	-0.0686855	-0.027875	0.000484587	-0.00849013	-0.0405873	0.128966	0.0138361	-0.0187715	0.0384401	-0.0236138	-0.0575559	-0.0888887	0.0273733	-0.0443975	-0.0408233	0.0208084
spliceosomal_assembly	0.0436964	0.246279	0.210518	0.208993	0.138189	-0.0422942	0.202918	-0.00824135	0.00896442	0.25476	0.0205192	-0.0882038	0.00625872	0.18228	0.0652608	0.186263	-0.0317022	0.222994	-0.0288637	-0.107015	-0.066563	0.200773	-0.0478198	-0.022746	0.1944	0.0394633	0.195716	0.0244612	-0.0268628	0.0811422	0.0440692	0.236631	0.0300549	-0.0271264	-0.110127	0.141994	0.165278	0.0206226	0.154712	0.202893	0.0301398	0.223419	-0.163181	0.00785426	-0.0242614	0.219867	0.0341241	-0.134774	0.218437
generation_of_amyloid_b-peptide_by_ps1	-0.0277689	0.0610714	-0.0349008	-0.0345305	0.161077	-0.0382363	-0.0270991	0.157523	-0.0363948	0.082099	0.0840437	0.0827512	0.10459	0.0606542	0.067834	0.0428246	-0.056572	-0.0320197	-0.0321375	-0.0389268	0.137793	0.0856247	-0.0473348	-0.0628784	-0.0381536	0.164633	-0.0374768	0.127237	0.157737	0.13977	0.078434	-0.0744248	-0.0198059	-0.0216004	-0.100599	-0.0823823	-0.0351147	0.305882	0.0795769	0.0878422	0.00963662	0.106973	-0.109347	0.171055	-0.0246628	-0.0617966	0.0962533	0.198706	-0.0503798
Transport_of_fatty_acids	-0.00776392	0.0400696	0.19118	0.196074	-0.00418551	-0.00673048	0.0518749	0.0205594	0.192278	-0.330871	-0.0143038	-0.0148685	0.00796585	-0.0362861	0.0142705	0.0151859	0.0132044	-0.304198	0.0330934	0.189967	-0.356977	0.146544	-0.333203	-0.0356831	-0.0167267	-0.0151702	0.0243264	0.00535094	-0.0556227	0.14218	0.0296926	-0.0100983	0.0515087	0.124545	-0.0716846	0.150317	-0.309872	-0.337805	0.0172073	-0.330784	-0.04304	0.0351684	0.0870028	-0.334609	0.188128	-0.00170573	0.0110469	0.0764772	-0.0310972
a6b1_and_a6b4_Integrin_signaling	0.0612888	0.0358911	0.0213919	0.0504447	0.0329542	0.0724348	0.0322761	0.06357	0.0590758	0.016532	0.0451555	0.0240819	0.0276737	0.0341028	0.0632905	0.0133239	0.0237621	0.0494096	0.0633942	0.0408425	0.030295	0.0381696	0.0590064	0.0394939	0.0103387	0.0338559	0.0690513	0.0910515	0.0168574	0.0351438	0.037439	0.0340191	0.0712449	0.00556913	0.0131415	0.0133453	0.0504546	0.0608548	0.0626163	0.0250995	-0.0330657	-0.0227978	0.000302355	0.105037	0.00727505	0.0196678	0.0636252	-0.0199294	-0.0108035
alpha-synuclein_and_parkin-mediated_proteolysis_in_parkinson_s_disease	0.140888	-0.00219894	0.150557	0.149058	0.176598	0.138946	0.157147	0.120139	0.141365	0.106393	0.114068	0.119801	0.104753	0.109887	0.112882	0.112949	0.110661	0.124027	0.0898324	0.139552	0.0803997	0.12576	0.124707	0.103428	0.127795	0.0807869	0.112651	0.0951648	0.0553677	0.160666	0.125537	-0.0269885	0.138518	0.0647255	0.0439099	0.133354	0.132734	0.123987	0.066926	0.0709351	0.0931751	0.115305	-0.0206273	0.129349	-0.0149397	0.00467005	0.13411	0.0826106	0.0621504
nfat_and_hypertrophy_of_the_heart_	0.00062366	0.0285631	0.0594691	-0.0243632	0.0321972	0.00888691	-0.0367091	-0.0120418	0.0121367	-0.0308536	-0.0442875	-0.000635306	0.0937966	0.0469919	-0.0416525	-0.0425555	-0.0207803	-0.030084	-0.00766638	0.025305	0.0877984	0.0121952	-0.0345209	-0.0322838	0.0252834	-0.0415279	-0.0022848	-0.0368886	0.0606259	-0.0107691	-0.0185233	-0.0354647	-0.00521324	-0.0452028	0.084177	-0.0150864	-0.0154034	0.0348297	0.034616	-0.0121314	0.0550567	0.0688185	0.0816869	0.0306008	-0.00115942	-0.006164	-0.0236081	0.046279	-0.00683379
[truncated: 677 more rows]
[truncated: 310 more columns]

## Sheet: Table S7
Table S7. differential pathway enrichment between high and low EPI group.
Pathway	logFC	AveExpr	t	P.Value	adj.P.Val	B
Amino_acid_synthesis_and_interconversion_(transamination)	0.202815	-0.233851	8.08291	9.71946e-15	8.42556e-13	22.6927
Activation_of_NOXA_and_translocation_to_mitochondria	0.177648	-0.125684	6.65579	1.0533e-10	2.1173e-09	13.5915
[truncated: 1,385 more rows]

## Sheet: Table S8
Table S8. differential gene expression between high and low EPI group.
[truncated: 3,385 more rows]

## Sheet: Table S9
Table S9. GO enrichment of high EPI group.
[truncated: 425 more rows]

[truncated: 2 more sheets: Table S10, Table S11]
